# Supplementary material for: Profiling transcriptomes of human SH-SY5Y neuroblastoma cells exposed to maleic acid
Source: PeerJ. 2017 Apr 5;5:e3175. doi: 10.7717/peerj.3175 (PMC5384566; doi:10.7717/peerj.3175)
Supplement: Supplemental Information 1 [file peerj-05-3175-s001.xlsx]

## Sheet: 42genes
Gene_symbol	C	M10	M50	M100
ABCA7	50.6502	78.5096	107.735	2223.73
EXOC3L2	141.276	235.183	393.217	626.879
IGF1	139.112	257.868	379.67	492.988
FCGR1B	65.1037	121.939	174.61	243.012
FAM92A1P2	59.103	110.668	157.255	210.514
TNF	37.4882	79.511	107.285	128.788
CLDN25	360.065	461.864	727.282	842.878
CR1	59.0709	104.366	138.803	178.201
RSPH6A	375.225	542.489	808.996	824.551
PCDHAC1	184.936	233.3	420.773	483.528
SOX17	44.1441	68.1944	92.8699	137.046
OR11G2	511.149	557.092	971.236	1064.55
FBXO40	225.186	325.747	508.184	508.76
FAM153A	88.0528	151.214	224.48	240.234
PKD1L1	353.674	427.544	636.676	697.946
GRIA1	35.5736	55.3642	82.6743	102.822
SPEM1	34.6376	75.2869	90.8163	91.4854
SPANXD	60.9535	112.837	162.878	185.849
FAM115C	276.43	352.657	525.063	560.531
GAB3	150.309	214.115	300.979	324.499
GNRHR	1024.38	1027.36	1466.16	1608.01
LOC541473	414.101	453.491	677.482	739.807
NFAT5	456.493	490.835	667.786	784.185
SLC25A48	346.066	400.445	563.937	629.254
FMO1	143.479	214.974	309.947	310.507
FCGR1A	181.505	242.049	345.07	369.097
ZNF671	114.754	143.881	215.646	257.035
SPATA1	1269.38	1369.62	1830.6	1863.57
AGAP1	109.055	157.049	218.208	242.804
EFCAB4A	397.195	432.559	632.702	663.545
CCBE1	276.117	284.455	413.091	534.155
OR6C65	305.078	349.623	492.783	542.172
C20orf173	110.162	139.332	234.492	238.458
SKAP1	110.668	147.057	219.608	234.783
B4GALNT4	202.002	174.803	157.558	97.9119
KCNC1	533.62	365.26	304.635	203.201
AKT2	301.476	201.375	177.395	129.688
PDPK1	262.525	177.8	167.266	112.732
ZNF800	572.699	289.484	272.866	193.627
HIST1H2BG	375.816	263.327	255.315	135.909
C4orf21	695.521	388.942	261.244	102.045
