# Supplementary material for: Profiling transcriptomes of human SH-SY5Y neuroblastoma cells exposed to maleic acid
Source: PeerJ. 2017 Apr 5;5:e3175. doi: 10.7717/peerj.3175 (PMC5384566; doi:10.7717/peerj.3175)
Supplement: Supplemental Information 4 [file peerj-05-3175-s004.xlsx]

## Sheet: 389 probs
	log2 (Ratio)				Annotation
ID	M10/C	M50/M10	M100/M50	M100/C	Gene_symbol		Description	Group	Entrez_gene	RefSeq	RNA_nucleotide_gi	Protein_accession.version	Ensembl_gene	Ensembl_transcript	Ensembl_protein
PH_hs_0030485	-0.17683	-0.0670939	-6.60199	-6.64386	TMEM185A	15.0531	transmembrane protein 185A	1	84548	"NM_001174092.1,NM_032508.2"	291575180;291575179	"NP_001167563.1,NP_115897.1"	ENSG00000268010|ENSG00000269556|ENSG00000155984	"ENST00000597324|ENST00000600449|ENST00000536359,ENST00000316916,ENST00000513505"	"ENSP00000471856|ENSP00000471932|ENSP00000443119,ENSP00000359449,ENSP00000429207"
PH_hs_0040950	-0.989674	-0.00740531	-1.14176	-2.34941	ZDBF2	38.1785	"zinc finger, DBF-type containing 2"	1	57683	NM_020923.1	151301097	NP_065974.1	NA	NA	NA
PH_hs_0016563	0.749799	0.266604	1.06696	2.28555	EXOC3L2	626.879	exocyst complex component 3-like 2	1	90332	NM_138568.3	226371707	NP_612635.3	ENSG00000130201	"ENST00000413988,ENST00000252482"	"ENSP00000400713,ENSP00000252482"
PH_hs_0045754	0.90885	0.0953178	0.763369	1.93389	IGF1	492.988	insulin-like growth factor 1 (somatomedin C)	1	3479	NM_001111285.1	163659902	NP_001104755.1	ENSG00000017427	ENST00000307046	ENSP00000302665
PH_hs_0000236	0.443625	0.182149	0.285529	1.031	INHBB	138.712	"inhibin, beta B"	1	3625	NM_002193.2	154813203	NP_002184.2	ENSG00000163083	ENST00000295228	ENSP00000295228
PH_hs_0004461	0.646366	0.0808785	0.880886	1.81902	FCGR1B|FCGR1A	243.012	"Fc fragment of IgG, high affinity Ib, receptor (CD64)|Fc fragment of IgG, high affinity Ia, receptor (CD64)"	4	2210|2209	"NM_001004340.3,NM_001017986.3,NR_045213.1|NM_000566.3"	349732138;349732137;349732146|167621452	"NP_001004340.2,NP_001017986.1,-|NP_000557.1"	ENSG00000266332|ENSG00000150337	ENST00000580698|ENST00000369168	ENSP00000462402|ENSP00000358165
PH_hs_0039714	0.639059	0.0688241	0.818366	1.71879	FAM92A1P2|FAM92A1	210.514	"family with sequence similarity 92, member A3|family with sequence similarity 92, member A1"	4	403315|137392	NR_003612.1|NM_145269.3	153791949|150170657	-|NP_660312.2	ENSG00000188343	"ENST00000521641,ENST00000517718,ENST00000518116,ENST00000423990,ENST00000359421"	"ENSP00000428751,ENSP00000428874,ENSP00000428065,ENSP00000401774,ENSP00000352391"
PH_hs_0000607	-0.824938	-0.0664587	-0.253186	-1.12579	EOGT	45.7239	EGF domain-specific O-linked N-acetylglucosamine (GlcNAc) transferase	1	285203	NM_173654.1	39930530	NP_775925.1	ENSG00000163378	"ENST00000295571,ENST00000383701"	"ENSP00000295571,ENSP00000373206"
PH_hs_0021977	-0.845463	-0.379647	-0.344865	-1.66925	PIK3R1	133.955	"phosphoinositide-3-kinase, regulatory subunit 1 (alpha)"	1	5295	"NM_181524.1,NM_001242466.1,NM_181504.3,NM_181523.2"	32455249;335057533;335057532;335057530	"NP_852665.1,NP_001229395.1,NP_852556.2,NP_852664.1"	ENSG00000145675	"ENST00000274335,ENST00000396611,ENST00000521381"	"ENSP00000274335,ENSP00000379855,ENSP00000428056"
PH_hs_0011427	1.34359	0.0444606	0.26359	1.65663	BANK1	859.096	B-cell scaffold protein with ankyrin repeats 1	1	55024	"NM_001083907.2,NM_001127507.2,NM_017935.4"	260763965;260763962;260763959	"NP_001077376.2,NP_001120979.2,NP_060405.4"	ENSG00000153064	"ENST00000428908,ENST00000444316,ENST00000322953,ENST00000504592"	"ENSP00000412748,ENSP00000388817,ENSP00000320509,ENSP00000421443"
PH_hs_0001363	-0.212218	-0.165783	-0.554308	-1.05509	NOP10	96.8202	NOP10 ribonucleoprotein	1	55505	NM_018648.3	77812675	NP_061118.1	ENSG00000182117	"ENST00000557912,ENST00000328848"	"ENSP00000453475,ENSP00000332198"
PH_hs_0044966	0.132724	0.385249	1.02167	1.64349	FAM86B3P	2520.72	"family with sequence similarity 86, member A pseudogene"	1	286042	NR_024361.1	211938422	-	NA	NA	NA
PH_hs_0001509	-0.781532	-0.039849	-0.0974406	-1.07378	PBLD	69.4653	phenazine biosynthesis-like protein domain containing	1	64081	NM_022129.3	74316007	NP_071412.2	ENSG00000108187	"ENST00000358769,ENST00000336578"	"ENSP00000351619,ENSP00000338041"
PH_hs_0060053	-0.724706	-0.375754	-0.408567	-1.64018	ZNF121	100.663	zinc finger protein 121	1	7675	NM_001008727.2	221136819	NP_001008727.1	ENSG00000197961	"ENST00000320451,ENST00000591447,ENST00000588400,ENST00000586602"	"ENSP00000326967,ENSP00000467838,ENSP00000467491,ENSP00000468643"
PH_hs_0062345	1.07919	0.0169879	0.419312	1.58852	BTNL10	121.64	butyrophilin-like 10	1	100129094	"XM_003960279.1,XM_001722031.3,XM_001722254.3"	410171583;397138936;397137973	"XP_003960328.1,XP_001722083.1,XP_001722306.1"	NA	NA	NA
PH_hs_0042256	1.00572	0.255092	0.137672	1.57975	OR10A4	585.144	"olfactory receptor, family 10, subfamily A, member 4"	1	283297	NM_207186.2	284172517	NP_997069.2	ENSG00000170782	ENST00000379829	ENSP00000369157
PH_hs_0012958	0.732726	0.00533381	0.725729	1.56455	TNF	128.788	tumor necrosis factor	1	7124	NM_000594.3	395132451	NP_000585.2	ENSG00000204490|ENSG00000206439|ENSG00000223952|ENSG00000230108|ENSG00000228321|ENSG00000232810|ENSG00000228849|ENSG00000228978	ENST00000376122|ENST00000383496|ENST00000448781|ENST00000443707|ENST00000412275|ENST00000449264|ENST00000420425|ENST00000445232	ENSP00000365290|ENSP00000372988|ENSP00000389490|ENSP00000389492|ENSP00000392858|ENSP00000398698|ENSP00000410668|ENSP00000389265
PH_hs_0043004	0.687162	0.112322	0.609566	1.55674	CLDN25	842.878	claudin 25	1	644672	NM_001101389.1	157820126	NP_001094859.1	ENSG00000228607	ENST00000453129	ENSP00000396304
PH_hs_0040936	-0.146959	-0.316052	-0.905259	-1.52478	FOXN3	168.301	forkhead box N3	1	1112	"NM_005197.3,NM_001085471.1"	146231981;146231999	"NP_005188.2,NP_001078940.1"	NA	NA	NA
PH_hs_0013220	-0.695884	-0.303735	-0.410263	-1.51352	PIK3C2A	124.88	"phosphatidylinositol-4-phosphate 3-kinase, catalytic subunit type 2 alpha"	1	5286	NM_002645.2	157671928	NP_002636.2	ENSG00000011405	ENST00000540361	ENSP00000438687
PH_hs_0019624	-0.96423	-0.141943	-0.292018	-1.50541	CHM	98.7092	choroideremia (Rab escort protein 1)	1	1121	NM_000390.2	82617643	NP_000381.1	ENSG00000188419	ENST00000537751	ENSP00000441728
PH_hs_0027569	-0.444414	-0.0849943	-0.820757	-1.47886	PDCL	61.2389	phosducin-like	1	5082	NM_005388.4	299782540	NP_005379.3	NA	NA	NA
PH_hs_0038856	-0.67397	-0.022504	-0.635193	-1.4641	CNOT6L	42.2644	"CCR4-NOT transcription complex, subunit 6-like"	1	246175	NM_144571.2	115583678	NP_653172.2	NA	NA	NA
PH_hs_0000376	-0.500902	-0.289029	-0.510369	-1.45966	SP4	85.7263	Sp4 transcription factor	1	6671	NM_003112.3	67010024	NP_003103.2	ENSG00000105866	ENST00000432066	ENSP00000393623
PH_hs_0045571	0.371823	0.145983	0.777871	1.44436	CR1	178.201	complement component (3b/4b) receptor 1 (Knops blood group)	1	1378	"NM_000651.4,NM_000573.3"	86793108;86793035	"NP_000642.3,NP_000564.2"	NA	NA	NA
PH_hs_0003027	0.484457	0.31933	0.231114	1.06204	NA	1226.39	NA	5	NA	NA	NA	NA	NA	NA	NA
PH_hs_0008743	1.00379	0.00547607	0.418739	1.44414	RSPH6A	824.551	radial spoke head 6 homolog A (Chlamydomonas)	1	81492	NM_030785.3	269315843	NP_110412.1	ENSG00000104941	"ENST00000597055,ENST00000600188,ENST00000221538"	"ENSP00000472630,ENSP00000471559,ENSP00000221538"
PH_hs_0034684	-0.275498	-0.503345	-0.509312	-1.43524	HIST1H2BG	135.909	"histone cluster 1, H2bg"	1	8339	NM_003518.3	21536482	NP_003509.1	ENSG00000187990	ENST00000244601	ENSP00000244601
PH_hs_0045407	0.396576	0.324162	0.585904	1.42555	PCDHAC1	483.528	"protocadherin alpha subfamily C, 1"	1	56135	NM_031882.2	14717402	NP_114088.2	ENSG00000248383	ENST00000409700	ENSP00000386356
PH_hs_0014405	1.11054	0.274827	0.033538	1.41513	CSAD	936.456	cysteine sulfinic acid decarboxylase	1	51380	"NM_015989.4,NM_001244705.1,NM_001244706.1"	194294550;347659020;347659022	"NP_057073.4,NP_001231634.1,NP_001231635.1"	ENSG00000139631	"ENST00000379843,ENST00000444623,ENST00000379846,ENST00000379850,ENST00000267085"	"ENSP00000369172,ENSP00000415485,ENSP00000369175,ENSP00000369179,ENSP00000267085"
PH_hs_0035957	-0.456093	-0.264463	-0.61749	-1.40938	ERCC6L2	273.782	"excision repair cross-complementing rodent repair deficiency, complementation group 6-like 2"	1	375748	NM_001010895.2	157364962	NP_001010895.1	ENSG00000182150	"ENST00000402838,ENST00000456993"	"ENSP00000384215,ENSP00000409751"
PH_hs_0041104	-0.507127	-0.0648654	-0.727199	-1.40667	GTF2I	117.386	general transcription factor IIi	1	2969	"NM_001163636.1,NM_033001.2,NM_033000.2,NM_032999.2,NM_001518.3"	254692933;169881255;169881254;169881253;169881251	"NP_001157108.1,NP_127494.1,NP_127493.1,NP_127492.1,NP_001509.3"	ENSG00000077809	ENST00000443166	ENSP00000404240
PH_hs_0042832	0.424011	0.367718	0.493286	1.3983	OR11G2	1064.55	"olfactory receptor, family 11, subfamily G, member 2"	1	390439	NM_001005503.1	53828743	NP_001005503.1	ENSG00000196832	ENST00000357366	ENSP00000349930
PH_hs_0004608	-0.838236	-0.0120489	-0.30853	-1.19127	MREG	102.179	melanoregulin	1	55686	NM_018000.2	124487398	NP_060470.2	ENSG00000118242	"ENST00000420348,ENST00000424992,ENST00000439791,ENST00000263268"	"ENSP00000404470,ENSP00000413302,ENSP00000411076,ENSP00000263268"
PH_hs_0027858	-1.0045	-0.0540333	-0.303188	-1.39518	DBT	122.54	dihydrolipoamide branched chain transacylase E2	1	1629	NM_001918.3	392494078	NP_001909.3	NA	NA	NA
PH_hs_0006032	-0.632199	-0.172011	-0.481386	-1.38457	MPP5	125.831	"membrane protein, palmitoylated 5 (MAGUK p55 subfamily member 5)"	1	64398	"NM_022474.3,NM_001256550.1"	375065849;375065851	"NP_071919.2,NP_001243479.1"	NA	NA	NA
PH_hs_0022745	-0.646292	-0.539855	-0.100408	-1.38074	ZNF800	193.627	zinc finger protein 800	1	168850	NM_176814.3	39753952	NP_789784.2	ENSG00000048405	ENST00000434602	ENSP00000403945
PH_hs_0028151	-0.449886	-0.187834	-0.617491	-1.37951	ZNF326	102.925	zinc finger protein 326	1	284695	NM_182976.2	156523255	NP_892021.1	NA	NA	NA
PH_hs_0002946	-0.542205	-0.404251	-0.340895	-1.37922	NR1D2	149.368	"nuclear receptor subfamily 1, group D, member 2"	1	9975	"NM_001145425.1,NM_005126.4"	224177492;224177490	"NP_001138897.1,NP_005117.3"	ENSG00000174738	ENST00000396676	ENSP00000379909
PH_hs_0014080	0.699014	0.178596	0.39342	1.36204	FBXO40	508.76	F-box protein 40	1	51725	NM_016298.3	156546887	NP_057382.2	NA	NA	NA
PH_hs_0044245	0.553369	0.16925	0.452215	1.36143	FAM153A|FAM153B	240.234	"family with sequence similarity 153, member A|family with sequence similarity 153, member B"	4	285596|202134	NM_173663.3|NM_001265615.1	123701921|388453844	NP_775934.3|NP_001252544.1	ENSG00000170074|ENSG00000182230	ENST00000440605|ENST00000515817	ENSP00000411506|ENSP00000427684
PH_hs_0006042	-0.403186	-0.117386	-0.612401	-1.21197	KCTD12	128.145	potassium channel tetramerisation domain containing 12	1	115207	NM_138444.3	146149187	NP_612453.1	NA	NA	NA
PH_hs_0025041	-0.408004	-0.204096	-0.634124	-1.35976	ARFIP1	170.847	ADP-ribosylation factor interacting protein 1	1	27236	"NM_001025595.1,NM_001025593.1,NM_014447.2"	71040093;71040091;71040088	"NP_001020766.1,NP_001020764.1,NP_055262.1"	ENSG00000164144	"ENST00000356064,ENST00000405727"	"ENSP00000348360,ENSP00000384189"
PH_hs_0007905	-0.240703	-0.197589	-0.789229	-1.34961	RABL3	156.051	"RAB, member of RAS oncogene family-like 3"	1	285282	NM_173825.3	115529441	NP_776186.2	ENSG00000144840	"ENST00000485161,ENST00000473654"	"ENSP00000417266,ENSP00000419310"
PH_hs_0006461	-0.775625	-0.0640294	-0.153924	-1.04467	previous version conserved probe	85.432	NA	7	NA	NA	NA	NA	NA	NA	NA
PH_hs_0006485	-0.598432	-0.223396	-0.197208	-1.03961	previous version conserved probe	296.665	NA	7	NA	NA	NA	NA	NA	NA	NA
PH_hs_0045405	0.787613	0.37891	0.080706	1.33617	GIGYF2	698.697	GRB10 interacting GYF protein 2	1	26058	"NM_001103148.1,NM_001103147.1,NM_001103146.1,NM_015575.3"	156766046;156766044;156766042;156766041	"NP_001096618.1,NP_001096617.1,NP_001096616.1,NP_056390.2"	ENSG00000204120	ENST00000373566	ENSP00000362667
PH_hs_0026375	-0.548266	-0.0861178	-0.602456	-1.32975	TRIM52	119.107	tripartite motif containing 52	1	84851	NM_032765.2	34147443	NP_116154.1	ENSG00000183718	ENST00000327767	ENSP00000332152
PH_hs_0038782	-0.14746	-0.223242	-0.780492	-1.32531	HEATR1	77.743	HEAT repeat containing 1	1	55127	NM_018072.5	301069317	NP_060542.4	ENSG00000119285	ENST00000366579	ENSP00000355538
PH_hs_0030984	-0.413422	-0.0450369	-0.734622	-1.32015	LOC101060541	148.084	RNA-binding protein 8A-like	1	101060541	XM_003960178.1	410171312	XP_003960227.1	ENSG00000265241|ENSG00000131795	ENST00000583313|ENST00000330165	ENSP00000463058|ENSP00000333001
PH_hs_0007308	0.60031	0.20046	0.296584	1.1024	LOC283710	2497.32	uncharacterized LOC283710	1	283710	NM_001243538.1	343780888	NP_001230467.1	NA	NA	NA
PH_hs_0041076	-0.466555	-0.16956	-0.55413	-1.31785	STX17	102.617	syntaxin 17	1	55014	NM_017919.2	157388936	NP_060389.2	ENSG00000136874	"ENST00000524405,ENST00000525342,ENST00000531035,ENST00000529340"	"ENSP00000436666,ENSP00000433701,ENSP00000433694,ENSP00000434323"
PH_hs_0002452	0.999502	0.0213	0.181973	1.31341	LPAR4	169.28	lysophosphatidic acid receptor 4	1	2846	NM_005296.2	223029437	NP_005287.1	ENSG00000147145	"ENST00000435339,ENST00000373301"	"ENSP00000408205,ENSP00000362398"
PH_hs_0008451	-0.671242	-0.234334	-0.271654	-1.24127	NA	164.985	NA	1	NA	NA	NA	NA	ENSG00000173905	ENST00000470487	ENSP00000417354
PH_hs_0044358	-0.317544	-0.0259911	-0.822831	-1.31011	FAM71F2	89.5315	"family with sequence similarity 71, member F2"	1	346653	NM_001012454.3	149192823	NP_001012457.3	ENSG00000205085	"ENST00000434001,ENST00000480462"	"ENSP00000401654,ENSP00000420140"
PH_hs_0008837	0.402774	0.164061	0.746556	1.37496	LOC100129484	1071.34	uncharacterized LOC100129484	1	100129484	"XR_171622.1,XR_108734.1,XR_110633.1,XR_112958.1"	410172131;310119906;310118218;310115168	-	ENSG00000234432	ENST00000382426	ENSP00000371863
PH_hs_0009318	-0.493308	-0.496754	-0.19065	-1.29886	PDPK1	112.732	3-phosphoinositide dependent protein kinase-1	1	5170	"NM_031268.5,NM_002613.4"	387849237;387849236	"NP_112558.2,NP_002604.1"	ENSG00000140992	"ENST00000354836,ENST00000389224"	"ENSP00000346895,ENSP00000373876"
PH_hs_0027848	-0.645254	-0.226763	-0.336085	-1.29526	POLK	124.353	polymerase (DNA directed) kappa	1	51426	NM_016218.2	208431818	NP_057302.1	ENSG00000122008	"ENST00000380481,ENST00000509126,ENST00000508526,ENST00000505975,ENST00000510815,ENST00000503479"	"ENSP00000369848,ENSP00000423532,ENSP00000426853,ENSP00000424859,ENSP00000422094,ENSP00000421997"
PH_hs_0024731	0.586528	0.116492	0.534465	1.29408	PKD1L1	697.946	polycystic kidney disease 1 like 1	1	168507	NM_138295.3	315434237	NP_612152.1	ENSG00000158683	ENST00000289672	ENSP00000289672
PH_hs_0014694	0.335827	0.560503	0.351354	1.29181	VWA7	1234.12	von Willebrand factor A domain containing 7	1	80737	NM_025258.2	153945851	NP_079534.2	ENSG00000223757|ENSG00000234433|ENSG00000204396|ENSG00000230048|ENSG00000227144|ENSG00000238203	"ENST00000547402,ENST00000438725|ENST00000550381,ENST00000430726|ENST00000375686,ENST00000375688|ENST00000546928,ENST00000438415|ENST00000550450,ENST00000452630|ENST00000551851,ENST00000452329"	"ENSP00000449880,ENSP00000413704|ENSP00000449988,ENSP00000411910|ENSP00000364838,ENSP00000364840|ENSP00000449478,ENSP00000390732|ENSP00000450313,ENSP00000411804|ENSP00000449358,ENSP00000406943"
PH_hs_0004827	-0.923571	-0.0183688	-0.279107	-1.28944	SUV39H2	106.525	suppressor of variegation 3-9 homolog 2 (Drosophila)	1	79723	"NM_001193425.1,NM_001193427.1,NM_001193426.1,NM_001193424.1,NM_024670.3,NR_034181.1"	301171596;301171612;301171604;301171587;34147611;301171620	"NP_001180354.1,NP_001180356.1,NP_001180355.1,NP_001180353.1,NP_078946.1,-"	ENSG00000152455	"ENST00000358298,ENST00000313519,ENST00000378331"	"ENSP00000351046,ENSP00000319208,ENSP00000367582"
PH_hs_0000023	-0.724612	-0.342834	-0.202454	-1.28658	MAP2	1458.27	microtubule-associated protein 2	1	4133	"NM_001039538.1,NM_002374.3,NM_031845.2,NM_031847.2"	87578393;87578395;87578391;87578254	"NP_001034627.1,NP_002365.3,NP_114033.2,NP_114035.2"	NA	NA	NA
PH_hs_0011058	-0.426345	-0.316783	-0.19065	-1.01699	KIAA1377	150.268	KIAA1377	1	57562	NM_020802.2	115387117	NP_065853.2	ENSG00000110318	"ENST00000537689,ENST00000532077,ENST00000532529"	"ENSP00000443184,ENSP00000437014,ENSP00000433643"
PH_hs_0032319	-0.305252	-0.428459	-0.450297	-1.28371	ZNF528	150.175	zinc finger protein 528	1	84436	NM_032423.2	46410932	NP_115799.2	ENSG00000167555	"ENST00000360465,ENST00000391788"	"ENSP00000353652,ENSP00000375665"
PH_hs_0011348	0.755975	0.101942	0.354501	1.27413	previous version conserved probe	596.91	NA	7	NA	NA	NA	NA	NA	NA	NA
PH_hs_0001809	-0.358544	-0.327777	-0.48974	-1.28206	SCRN3	190.41	secernin 3	1	79634	"NM_001193528.1,NM_024583.4"	302058286;302058285	"NP_001180457.1,NP_078859.2"	ENSG00000144306	ENST00000272732	ENSP00000272732
PH_hs_0012412	0.923589	0.145912	0.120909	1.12567	CLEC4G	735.913	"C-type lectin domain family 4, member G"	1	339390	"NM_198492.3,NM_001244856.1"	221136795;349732268	"NP_940894.1,NP_001231785.1"	ENSG00000182566	ENST00000328853	ENSP00000327599
PH_hs_0028398	-0.693056	-0.0775145	-0.399801	-1.27532	KIAA0825	95.2393	KIAA0825	1	285600	"NM_173665.2,NM_001145678.1"	197100792;224589076	"NP_775936.1,NP_001139150.1"	NA	NA	NA
PH_hs_0011156	-0.417352	-0.120478	-0.647693	-1.27071	TCEANC2	224.243	transcription elongation factor A (SII) N-terminal and central domain containing 2	1	127428	NM_153035.1	23308504	NP_694580.1	ENSG00000116205	ENST00000234827	ENSP00000234827
PH_hs_0025994	-0.436351	-0.119482	-0.587804	-1.26416	KIF1B	75.7	kinesin family member 1B	1	23095	NM_015074.3	189339259	NP_055889.2	ENSG00000054523	ENST00000263934	ENSP00000263934
PH_hs_0032201	-0.749384	-0.0642136	-0.415215	-1.26313	FAM200A	309.737	"family with sequence similarity 200, member A"	1	221786	NM_145111.3	301601651	NP_659802.1	ENSG00000221909	"ENST00000408938,ENST00000449309"	"ENSP00000386191,ENSP00000411372"
PH_hs_0032148	-0.805707	-0.18905	-0.163516	-1.26043	PEG3	106.833	paternally expressed 3	1	5178	"NM_001146187.1,NM_001146186.1,NM_001146185.1,NM_001146184.1,NM_006210.2"	226053184;226053168;226053147;226053125;226053068	"NP_001139659.1,NP_001139658.1,NP_001139657.1,NP_001139656.1,NP_006201.1"	ENSG00000198300	ENST00000598410	ENSP00000473190
PH_hs_0013248	-0.331985	-0.275676	-0.386628	-1.11687	previous version conserved probe	74.1568	NA	7	NA	NA	NA	NA	NA	NA	NA
PH_hs_0032859	-0.558751	-0.109723	-0.480967	-1.25599	SMAD1	99.6468	SMAD family member 1	1	4086	"NM_001003688.1,NM_005900.2"	51173726;51173725	"NP_001003688.1,NP_005891.1"	NA	NA	NA
PH_hs_0013497	0.86775	0.206772	0.120646	1.17155	PRSS36	1703.35	"protease, serine, 36"	1	146547	"NM_173502.4,NM_001258291.1,NM_001258290.1"	385137131;385137134;385137132	"NP_775773.2,NP_001245220.1,NP_001245219.1"	ENSG00000178226	"ENST00000569305,ENST00000418068,ENST00000268281"	"ENSP00000454768,ENSP00000407160,ENSP00000268281"
PH_hs_0013831	0.789866	0.0978141	0.351793	1.24226	NA	1433.93	NA	5	NA	NA	NA	NA	NA	NA	NA
PH_hs_0013981	0.635873	0.0720921	0.402429	1.20793	ADAMTS8	106.665	"ADAM metallopeptidase with thrombospondin type 1 motif, 8"	1	11095	NM_007037.4	153792350	NP_008968.4	ENSG00000134917	ENST00000257359	ENSP00000257359
PH_hs_0035519	-0.679192	-0.154377	-0.35378	-1.2559	SGOL1	218.203	shugoshin-like 1 (S. pombe)	1	151648	"NM_138484.3,NM_001199256.1,NM_001012412.3,NM_001199257.1,NM_001199254.1"	312922398;312922340;312922396;312922344;312922338	"NP_612493.1,NP_001186185.1,NP_001012412.1,NP_001186186.1,NP_001186183.1"	ENSG00000129810	"ENST00000429446,ENST00000383774,ENST00000417364,ENST00000437051,ENST00000452020,ENST00000443724,ENST00000425061,ENST00000419233,ENST00000306698"	"ENSP00000404562,ENSP00000373284,ENSP00000394613,ENSP00000389034,ENSP00000411200,ENSP00000413070,ENSP00000414960,ENSP00000394625,ENSP00000306581"
PH_hs_0014292	0.765338	0.0281062	0.332356	1.21608	previous version conserved probe	116.87	NA	7	NA	NA	NA	NA	NA	NA	NA
PH_hs_0062252	0.426064	0.0733182	0.592617	1.25488	SPANXD|SPANXB1|SPANXB2|SPANXE|SPANXC|SPANXF1|SPANXA2|SPANXA1	185.849	"SPANX family, member D|SPANX family, member B1|SPANX family, member B2|SPANX family, member E|SPANX family, member C|SPANX family, member F1|SPANX family, member A2|sperm protein associated with the nucleus, X-linked, family member A1"	4	64648|728695|100133171|171489|64663|171490|728712|30014	NM_032417.2|NM_032461.2|NM_145664.1|NM_145665.1|NM_022661.2|NM_139019.1|NM_145662.2|NM_013453.2	22027494|22027490|22027491|22027495|22027493|190570191|49619235|14192936	NP_115793.1|NP_115850.1|NP_663697.1|NP_663698.1|NP_073152.1|NP_620588.1|NP_663695.1|NP_038481.2	ENSG00000269838|ENSG00000196406|ENSG00000269309|ENSG00000235604|ENSG00000227234|ENSG00000268239|ENSG00000269063|ENSG00000269853|ENSG00000203926|ENSG00000198021|ENSG00000198573	ENST00000597815|ENST00000370515|ENST00000594260|ENST00000370530|ENST00000449283|ENST00000600641|ENST00000597736|ENST00000598204|ENST00000370518|ENST00000370519|ENST00000358993	ENSP00000472247|ENSP00000359546|ENSP00000472817|ENSP00000359561|ENSP00000405202|ENSP00000471479|ENSP00000472201|ENSP00000469053|ENSP00000359549|ENSP00000359550|ENSP00000351884
PH_hs_0046211	-0.449336	-0.0226902	-0.745739	-1.25366	GTPBP10	478.647	GTP-binding protein 10 (putative)	1	85865	"NM_033107.3,NM_001042717.2"	313760600;313760599	"NP_149098.2,NP_001036182.1"	NA	NA	NA
PH_hs_0044321	-0.538797	-0.242803	-0.412184	-1.2512	PHF6	158.21	PHD finger protein 6	1	84295	NM_032335.3	183603926	NP_115711.2	ENSG00000156531	ENST00000370800	ENSP00000359836
PH_hs_0015864	0.80293	0.102597	0.47236	1.4346	NA	730.889	NA	5	NA	NA	NA	NA	NA	NA	NA
PH_hs_0006398	-0.349664	-0.431158	-0.427625	-1.24618	HDAC9	523.146	histone deacetylase 9	1	9734	"NM_178425.2,NM_178423.1"	116284377;30795201	"NP_848512.1,NP_848510.1"	ENSG00000048052	ENST00000406451	ENSP00000384657
PH_hs_0016217	-0.247624	-0.136885	-0.634064	-1.12855	SOX6	67.306	SRY (sex determining region Y)-box 6	1	55553	"NM_001145819.1,NM_001145811.1,NM_017508.2,NM_033326.3"	224967053;224967049;224967048;224967047	"NP_001139291.1,NP_001139283.1,NP_059978.1,NP_201583.2"	NA	NA	NA
PH_hs_0016601	0.468942	0.363429	0.382053	1.23737	MYLK3	1117.57	myosin light chain kinase 3	1	91807	NM_182493.2	146219831	NP_872299.2	ENSG00000140795	"ENST00000536476,ENST00000394809"	"ENSP00000439297,ENSP00000378288"
PH_hs_0060952	0.572972	0.118724	0.475958	1.23603	FAM115C	560.531	"family with sequence similarity 115, member C"	1	285966	NM_001130026.2	293651620	NP_001123498.2	ENSG00000170379	"ENST00000409703,ENST00000441159"	"ENSP00000386405,ENSP00000404265"
PH_hs_0016517	0.571146	0.0764516	0.73379	1.54549	previous version conserved probe	250.647	NA	7	NA	NA	NA	NA	NA	NA	NA
PH_hs_0024252	-0.625326	-0.0828978	-0.439343	-1.22421	RAD18	125.369	RAD18 homolog (S. cerevisiae)	1	56852	NM_020165.3	256818820	NP_064550.3	NA	NA	NA
PH_hs_0035792	-0.448926	-0.640554	-0.0202938	-1.22226	AKT2	129.688	v-akt murine thymoma viral oncogene homolog 2	1	208	"NM_001626.4,NM_001243028.1,NM_001243027.1"	339895851;339895854;339895852	"NP_001617.1,NP_001229957.1,NP_001229956.1"	ENSG00000105221	"ENST00000424901,ENST00000578615,ENST00000579047,ENST00000311278,ENST00000584288,ENST00000391844"	"ENSP00000399532,ENSP00000463262,ENSP00000471369,ENSP00000309428,ENSP00000462469,ENSP00000375719"
PH_hs_0036032	-0.694119	-0.130511	-0.276945	-1.22037	ZNF850	86.729	zinc finger protein 850	1	342892	"NM_001267779.1,NM_001193552.1"	392050771;302148469	"NP_001254708.1,NP_001180481.1"	NA	NA	NA
PH_hs_0016947	-0.773697	-0.0229328	-0.118946	-1.00299	ZNF396	76.227	zinc finger protein 396	1	252884	NM_145756.2	222352103	NP_665699.1	ENSG00000186496	ENST00000306346	ENSP00000302310
PH_hs_0003291	0.327071	0.386255	0.435282	1.2181	TCIRG1	894.388	"T-cell, immune regulator 1, ATPase, H+ transporting, lysosomal V0 subunit A3"	1	10312	"NM_006053.3,NM_006019.3"	314122261;314122259	"NP_006044.1,NP_006010.2"	ENSG00000110719	"ENST00000532635,ENST00000265686,ENST00000530063"	"ENSP00000434407,ENSP00000265686,ENSP00000432957"
PH_hs_0034411	-0.751842	-0.221575	-0.185516	-1.21505	ZNF208	142.144	zinc finger protein 208	1	7757	NM_007153.3	256418947	NP_009084.2	ENSG00000160321	ENST00000397126	ENSP00000380315
PH_hs_0019087	-0.145172	-0.203612	-0.50577	-1.08702	REST	126.885	RE1-silencing transcription factor	1	5978	"NM_001193508.1,NM_005612.4"	301897976;301897973	"NP_001180437.1,NP_005603.3"	NA	NA	NA
PH_hs_0019418	0.566574	0.147225	0.336601	1.07279	LOC286370	1117.18	uncharacterized LOC286370	1	286370	NR_038882.1	336455066	-	NA	NA	NA
PH_hs_0010745	-0.181475	-0.710119	-0.199508	-1.21489	KCNC1	203.201	"potassium voltage-gated channel, Shaw-related subfamily, member 1"	1	3746	"NM_001112741.1,NM_004976.4"	163792200;163792199	"NP_001106212.1,NP_004967.1"	NA	NA	NA
PH_hs_0020015	0.440929	0.122098	0.425534	1.13895	NA	229.708	NA	5	NA	NA	NA	NA	NA	NA	NA
PH_hs_0016437	-0.714249	-0.0206245	-0.396352	-1.20992	CEP19	145.911	centrosomal protein 19kDa	1	84984	NM_032898.3	190885492	NP_116287.2	NA	NA	NA
PH_hs_0000553	0.700265	0.221728	0.292854	1.20986	EPS8L3	2281.14	EPS8-like 3	1	79574	"NM_024526.3,NM_133181.3,NM_139053.2"	320118889;320118888;320118887	"NP_078802.2,NP_573444.2,NP_620641.1"	ENSG00000198758	"ENST00000369805,ENST00000361852"	"ENSP00000358820,ENSP00000354551"
PH_hs_0022052	-0.447755	-0.252601	-0.243044	-1.0621	SIKE1	101.344	suppressor of IKBKE 1	1	80143	"NM_001102396.1,NM_025073.2,NR_049742.1,NR_049741.1"	156151378;156151376;387942383;387942382	"NP_001095866.1,NP_079349.2,-"	ENSG00000052723	ENST00000060969	ENSP00000060969
PH_hs_0060089	0.795155	0.0375649	0.355453	1.2083	CDH23	834.392	cadherin-related 23	1	64072	NM_001171932.1	284925131	NP_001165403.1	NA	NA	NA
PH_hs_0022233	0.243444	0.0361895	0.909937	1.41141	SOX17	137.046	SRY (sex determining region Y)-box 17	1	64321	NM_022454.3	145275218	NP_071899.1	ENSG00000164736	ENST00000297316	ENSP00000297316
PH_hs_0022331	0.619683	0.0240423	0.451218	1.21471	GAB3	324.499	GRB2-associated binding protein 3	1	139716	"NM_001081573.1,NM_080612.2"	126091129;126091132	"NP_001075042.1,NP_542179.1"	ENSG00000268699|ENSG00000160219	ENST00000596917|ENST00000369575	ENSP00000468967|ENSP00000358588
PH_hs_0026204	0.751133	0.0469105	0.3333	1.20639	ANKK1	126.153	ankyrin repeat and kinase domain containing 1	1	255239	NM_178510.1	30425443	NP_848605.1	ENSG00000170209	ENST00000303941	ENSP00000306678
PH_hs_0022703	-0.335074	-0.379405	-0.203244	-1.06046	PRKCE	88.2586	"protein kinase C, epsilon"	1	5581	NM_005400.2	47157326	NP_005391.1	NA	NA	NA
PH_hs_0046378	-0.393738	-0.420793	-0.273233	-1.20593	ZNF773	112.168	zinc finger protein 773	1	374928	NM_198542.1	38524613	NP_940944.1	ENSG00000152439	"ENST00000282292,ENST00000598770"	"ENSP00000282292,ENSP00000469416"
PH_hs_0022750	-0.604768	-0.180796	-0.201939	-1.06553	SETD7	67.9493	SET domain containing (lysine methyltransferase) 7	1	80854	NM_030648.2	83035135	NP_085151.1	NA	NA	NA
PH_hs_0023129	-0.888965	-0.0241212	-0.215428	-1.20107	previous version conserved probe	101.074	NA	7	NA	NA	NA	NA	NA	NA	NA
PH_hs_0045050	-0.247914	-0.0457402	-0.782088	-1.19724	INTS6	99.1712	integrator complex subunit 6	1	26512	NM_001039938.1	90193623	NP_001035027.1	ENSG00000102786	ENST00000442263	ENSP00000411245
PH_hs_0023282	-0.430742	-0.202179	-0.798529	-1.53245	previous version conserved probe	225.927	NA	7	NA	NA	NA	NA	NA	NA	NA
PH_hs_0026240	0.699517	0.0304612	0.324823	1.19571	ADM2	262.186	adrenomedullin 2	1	79924	"NM_001253845.1,NM_024866.5"	359718925;359718924	"NP_001240774.1,NP_079142.2"	NA	NA	NA
PH_hs_0048806	-0.709867	-0.0139134	-0.427614	-1.1951	ZNF277	214.165	zinc finger protein 277	1	11179	NM_021994.2	126723500	NP_068834.2	NA	NA	NA
PH_hs_0061475	0.559473	0.0784272	0.542366	1.19459	GNRHR	1608.01	gonadotropin-releasing hormone receptor	1	2798	"NM_000406.2,NM_001012763.1"	61676182;61676183	"NP_000397.1,NP_001012781.1"	ENSG00000109163	ENST00000226413	ENSP00000226413
PH_hs_0023654	-0.287382	-0.151046	-0.561693	-1.10534	previous version conserved probe	159.934	NA	7	NA	NA	NA	NA	NA	NA	NA
PH_hs_0040797	-0.201337	-0.580003	-0.237789	-1.18773	B4GALNT4	97.9119	"beta-1,4-N-acetyl-galactosaminyl transferase 4"	1	338707	NM_178537.4	227498915	NP_848632.2	NA	NA	NA
PH_hs_0010099	-0.598878	-0.410758	-0.0842286	-1.17925	TMX4	171.271	thioredoxin-related transmembrane protein 4	1	56255	NM_021156.2	40254946	NP_066979.2	NA	NA	NA
PH_hs_0023912	-0.51686	-0.0598409	-0.585103	-1.24275	WDR17	139.177	WD repeat domain 17	1	116966	"NM_181265.3,NM_170710.4"	266457047;266457004	"NP_851782.3,NP_733828.2"	ENSG00000150627	"ENST00000507824,ENST00000280190,ENST00000508596"	"ENSP00000422200,ENSP00000280190,ENSP00000422763"
PH_hs_0003124	-0.569318	-0.106924	-0.482221	-1.17756	MSH3	1610.08	mutS homolog 3 (E. coli)	1	4437	NM_002439.4	390517033	NP_002430.3	ENSG00000113318	ENST00000265081	ENSP00000265081
PH_hs_0036035	-0.690659	-0.4229	-0.0122783	-1.17742	BOD1L1	216.865	biorientation of chromosomes in cell division 1-like 1	1	259282	NM_148894.2	87299627	NP_683692.2	NA	NA	NA
PH_hs_0002445	-0.400307	-0.287272	-0.441831	-1.17456	SEMA5A	753.648	"sema domain, seven thrombospondin repeats (type 1 and type 1-like), transmembrane domain (TM) and short cytoplasmic domain, (semaphorin) 5A"	1	9037	NM_003966.2	147904699	NP_003957.2	NA	NA	NA
PH_hs_0024257	0.799816	0.0751055	0.185553	1.09646	CCND2	164.099	cyclin D2	1	894	NM_001759.3	209969683	NP_001750.1	ENSG00000118971	ENST00000261254	ENSP00000261254
PH_hs_0062503	0.739237	0.143934	0.279334	1.17443	LOC100652741	1007.14	protein capicua homolog	1	100652741	"XM_003960779.1,XM_003403479.1,XM_003846613.1"	410173618;341915866;397137904	"XP_003960828.1,XP_003403527.1,XP_003846661.1"	NA	NA	NA
PH_hs_0024376	-0.202431	-0.108072	-0.643395	-1.04326	previous version conserved probe	112.089	NA	7	NA	NA	NA	NA	NA	NA	NA
PH_hs_0024562	-0.70011	-0.0576001	-0.174532	-1.01594	N4BP2	82.0888	NEDD4 binding protein 2	1	55728	NM_018177.4	339275991	NP_060647.2	ENSG00000078177	ENST00000513269	ENSP00000426430
PH_hs_0046432	0.483781	0.119749	0.515266	1.17307	LOC541473	739.807	"FK506 binding protein 6, 36kDa pseudogene"	1	541473	NR_003602.2	392871547	-	NA	NA	NA
PH_hs_0013072	0.299284	0.532739	0.239576	1.17305	CD68	519.588	CD68 molecule	1	968	"NM_001040059.1,NM_001251.2"	91199549;91199547	"NP_001035148.1,NP_001242.2"	ENSG00000129226	"ENST00000584180,ENST00000380498,ENST00000250092"	"ENSP00000462198,ENSP00000369867,ENSP00000250092"
PH_hs_0032542	-0.394523	-0.148368	-0.586774	-1.17126	ZNF655	688.217	zinc finger protein 655	1	79027	"NM_001009960.1,NM_001085368.1,NM_001083956.1,NM_138494.2"	58331263;145701020;145701014;58331258	"NP_001009960.1,NP_001078837.1,NP_001077425.1,NP_612503.1"	NA	NA	NA
PH_hs_0034159	-0.652351	-0.205257	-0.296435	-1.17063	ZNF271	209.922	zinc finger protein 271	1	10778	"NR_024565.1,NR_024566.1"	217035127;217035128	-	NA	NA	NA
PH_hs_0024886	0.233944	0.142668	0.483758	1.01886	SKAP1	234.783	src kinase associated phosphoprotein 1	1	8631	"NM_001075099.1,NM_003726.3"	115527075;115527073	"NP_001068567.1,NP_003717.3"	ENSG00000141293	"ENST00000581419,ENST00000581400,ENST00000584924,ENST00000584709,ENST00000336915"	"ENSP00000462437,ENSP00000462360,ENSP00000464311,ENSP00000463284,ENSP00000338171"
PH_hs_0060432	0.460386	0.00459544	0.635776	1.1667	NFAT5	784.185	"nuclear factor of activated T-cells 5, tonicity-responsive"	1	10725	NM_173215.2	342672016	NP_775322.1	ENSG00000102908	ENST00000566899	ENSP00000455628
PH_hs_0027950	-0.619983	-0.0359446	-0.444372	-1.16526	ZNF268	188.833	zinc finger protein 268	1	10795	"NM_001165884.2,NM_001165882.2,NM_001165881.2,NM_001165887.1,NM_001165886.1,NM_001165885.1,NM_001165883.1,NM_152943.2,NM_003415.2"	298358579;298358576;298358568;259490342;259490338;259490334;259490326;259490311;259490308	"NP_001159356.2,NP_001159354.1,NP_001159353.1,NP_001159359.1,NP_001159358.1,NP_001159357.1,NP_001159355.1,NP_694422.2,NP_003406.1"	ENSG00000090612	"ENST00000537565,ENST00000541009,ENST00000542986,ENST00000536899,ENST00000228289"	"ENSP00000445713,ENSP00000439539,ENSP00000443721,ENSP00000438941,ENSP00000228289"
PH_hs_0043099	0.474761	0.0523263	0.551484	1.16282	SLC25A48	629.254	"solute carrier family 25, member 48"	1	153328	NM_145282.4	223468575	NP_660325.4	ENSG00000145832	ENST00000412661	ENSP00000413049
PH_hs_0028368	-0.272545	-0.197066	-0.584202	-1.16044	FAM91A1	122.078	"family with sequence similarity 91, member A1"	1	157769	NM_144963.2	84000431	NP_659400.2	NA	NA	NA
PH_hs_0046473	0.641774	0.22649	0.269476	1.15994	BET3L	824.865	BET3 like (S. cerevisiae)	1	100128327	NM_001139444.2	228008411	NP_001132916.1	ENSG00000173626	"ENST00000368602,ENST00000437098"	"ENSP00000357591,ENSP00000395769"
PH_hs_0025760	0.42858	0.140959	0.390944	1.0511	SLC16A7	111.151	"solute carrier family 16, member 7 (monocarboxylic acid transporter 2)"	1	9194	"NM_001270622.1,NM_001270623.1,NR_073056.1,NR_073055.1,NM_004731.4"	397739032;397739030;398303862;398303861;397739029	"NP_001257551.1,NP_001257552.1,-,NP_004722.2"	NA	NA	NA
PH_hs_0025926	-0.62465	-0.30797	-0.108291	-1.06235	previous version conserved probe	138.712	NA	7	NA	NA	NA	NA	NA	NA	NA
PH_hs_0060047	-0.157645	-0.306776	-0.574725	-1.15609	ACBD4	136.898	acyl-CoA binding domain containing 4	1	79777	NM_001135707.1	209364599	NP_001129179.1	ENSG00000181513	ENST00000376955	ENSP00000366154
PH_hs_0026014	-0.563441	-0.0315421	-0.471392	-1.12352	ALS2CR8	45.0942	"amyotrophic lateral sclerosis 2 (juvenile) chromosome region, candidate 8"	1	79800	"NM_024744.14,NM_001104586.1"	157168370;157168371	"NP_079020.13,NP_001098056.1"	ENSG00000138380	"ENST00000545262,ENST00000545253,ENST00000438828,ENST00000428585,ENST00000414439,ENST00000402905"	"ENSP00000440467,ENSP00000439769,ENSP00000414644,ENSP00000396221,ENSP00000416160,ENSP00000384006"
PH_hs_0003748	-0.183644	-0.336023	-0.522468	-1.15206	ADAMTS5	136.936	"ADAM metallopeptidase with thrombospondin type 1 motif, 5"	1	11096	NM_007038.3	195539371	NP_008969.2	NA	NA	NA
PH_hs_0033011	-0.802395	-0.102732	-0.130568	-1.14897	C4orf21	82.2941	chromosome 4 open reading frame 21	1	55345	NM_018392.4	254826808	NP_060862.3	ENSG00000138658	ENST00000309071	ENSP00000309095
PH_hs_0026279	0.163971	0.251906	0.455518	1.00972	NA	381.916	NA	5	NA	NA	NA	NA	NA	NA	NA
PH_hs_0060306	-0.750031	-0.24996	-0.0753294	-1.14857	NEK2	128.634	NIMA-related kinase 2	1	4751	NM_001204183.1	323510689	NP_001191112.1	ENSG00000117650	ENST00000366998	ENSP00000355965
PH_hs_0061933	-0.905574	-0.126423	-0.102284	-1.14625	LIMS1	1611.59	LIM and senescent cell antigen-like domains 1	1	3987	"NM_001193488.1,NM_001193484.1,NM_001193482.1,NM_001193485.2,NM_004987.5,NM_001193483.2"	301601629;301601608;301601604;336455030;336455029;336455028	"NP_001180417.1,NP_001180413.1,NP_001180411.1,NP_001180414.1,NP_004978.2,NP_001180412.1"	NA	NA	NA
PH_hs_0026612	-0.23425	-0.441834	-0.265966	-1.03085	SDCCAG8	90.9825	serologically defined colon cancer antigen 8	1	10806	NM_006642.3	308210778	NP_006633.1	ENSG00000054282	"ENST00000343783,ENST00000355875,ENST00000435549,ENST00000366541"	"ENSP00000341260,ENSP00000348137,ENSP00000410200,ENSP00000355499"
PH_hs_0061000	0.608918	0.31513	0.202374	1.14439	RNF183	1088.65	ring finger protein 183	1	138065	NM_145051.3	153252109	NP_659488.2	ENSG00000165188	"ENST00000297894,ENST00000478815,ENST00000416588,ENST00000441031"	"ENSP00000417943,ENSP00000419454,ENSP00000420740,ENSP00000417176"
PH_hs_0027349	0.603795	0.218813	0.198287	1.0261	previous version conserved probe	2439.87	NA	7	NA	NA	NA	NA	NA	NA	NA
PH_hs_0006975	0.671919	0.0880027	0.382335	1.14426	DNAJB3|LOC100286922	2652.25	"DnaJ (Hsp40) homolog, subfamily B, member 3|DnaJ (Hsp40) homolog, subfamily B, member 3 pseudogene"	4	414061|100286922	NM_001001394.3|NR_037694.1	157786298|317171914	NP_001001394.1|-	NA	NA	NA
PH_hs_0027651	-0.326433	-0.167508	-0.470222	-1.10067	TNFRSF10B	76.162	"tumor necrosis factor receptor superfamily, member 10b"	1	8795	"NR_027140.1,NM_147187.2,NM_003842.4"	224494036;224494025;224494018	"-,NP_671716.2,NP_003833.4"	NA	NA	NA
PH_hs_0048342	-0.310633	-0.238365	-0.48902	-1.14131	FAM111B	130.677	"family with sequence similarity 111, member B"	1	374393	"NM_001142704.1,NM_001142703.1,NM_198947.3"	218156274;218156272;218156271	"NP_001136176.1,NP_001136175.1,NP_945185.1"	ENSG00000189057	"ENST00000411426,ENST00000343597,ENST00000529618"	"ENSP00000393855,ENSP00000341565,ENSP00000432875"
PH_hs_0027768	-0.541884	-0.0851908	-0.375448	-1.10004	SPIN4	70.4166	"spindlin family, member 4"	1	139886	NM_001012968.2	108796660	NP_001012986.2	NA	NA	NA
PH_hs_0027842	0.303084	0.0287147	2.89564	3.56064	ABCA7	2223.73	"ATP-binding cassette, sub-family A (ABC1), member 7"	1	10347	NM_019112.3	150417983	NP_061985.2	NA	NA	NA
PH_hs_0061642	-0.337977	-0.0713205	-0.638167	-1.13886	BRWD1	152.259	bromodomain and WD repeat domain containing 1	1	54014	"NM_018963.4,NM_033656.3"	335057563;335057561	"NP_061836.2,NP_387505.1"	NA	NA	NA
PH_hs_0027855	-0.295148	-0.0793269	-0.577607	-1.0489	FIGNL1	31.8034	fidgetin-like 1	1	63979	"NM_022116.3,NM_001042762.1"	112789544;112789542	"NP_071399.2,NP_001036227.1"	ENSG00000132436	"ENST00000448788,ENST00000420829"	"ENSP00000402957,ENSP00000409281"
PH_hs_0023749	-0.670921	-0.0962589	-0.32156	-1.13796	PRELID2	181.027	PRELI domain containing 2	1	153768	"NM_205846.1,NM_182960.2,NM_138492.4"	45593131;45545422;45505153	"NP_995318.1,NP_892005.1,NP_612501.3"	ENSG00000186314	"ENST00000358004,ENST00000334744"	"ENSP00000350694,ENSP00000335675"
PH_hs_0024773	0.689669	0.0762409	0.320169	1.13786	CD55	528.679	"CD55 molecule, decay accelerating factor for complement (Cromer blood group)"	1	1604	"NM_001114752.1,NM_000574.3"	168693642;167621447	"NP_001108224.1,NP_000565.1"	ENSG00000196352	"ENST00000367062,ENST00000391920,ENST00000367065,ENST00000314754,ENST00000391921,ENST00000367064"	"ENSP00000356029,ENSP00000375787,ENSP00000356032,ENSP00000316333,ENSP00000375788,ENSP00000356031"
PH_hs_0027901	-0.515148	-0.0968056	-0.328582	-1.02956	previous version conserved probe	95.3283	NA	7	NA	NA	NA	NA	NA	NA	NA
PH_hs_0044210	-0.462862	-0.282891	-0.3161	-1.13647	TRIM14	177.917	tripartite motif containing 14	1	9830	"NM_033219.1,NM_033220.1"	15208664;15208666	"NP_150088.1,NP_150089.1"	ENSG00000106785	"ENST00000475147,ENST00000342043,ENST00000375098"	"ENSP00000428805,ENSP00000343990,ENSP00000364239"
PH_hs_0023548	-0.306334	-0.0290432	-0.722398	-1.13544	CCDC88A	201.361	coiled-coil domain containing 88A	1	55704	"NM_018084.4,NM_001135597.1,NM_001254943.1"	208022633;208022631;363807221	"NP_060554.3,NP_001129069.1,NP_001241872.1"	ENSG00000115355	"ENST00000413716,ENST00000456975,ENST00000412148"	"ENSP00000404431,ENSP00000415267,ENSP00000390012"
PH_hs_0061046	0.710059	0.151901	0.271366	1.13528	CDH8	2931.11	"cadherin 8, type 2"	1	1006	NM_001796.4	332688225	NP_001787.2	NA	NA	NA
PH_hs_0060673	0.813192	0.124427	0.216192	1.13414	DLX1	1687.58	distal-less homeobox 1	1	1745	"NM_001038493.1,NM_178120.4"	84043955;84043957	"NP_001033582.1,NP_835221.2"	ENSG00000144355	"ENST00000469444,ENST00000361609"	"ENSP00000448827,ENSP00000354865"
PH_hs_0028232	-0.4248	-0.284969	-0.299104	-1.07312	ZNF345	96.3309	zinc finger protein 345	1	25850	"NM_001242475.1,NM_001242472.1,NM_003419.4"	335057552;335057545;335057544	"NP_001229404.1,NP_001229401.1,NP_003410.1"	ENSG00000251247	"ENST00000331800,ENST00000526123"	"ENSP00000331120,ENSP00000467611"
PH_hs_0005110	0.672311	0.088642	0.239222	1.13343	FRMPD4	246.428	FERM and PDZ domain containing 4	1	9758	NM_014728.3	284172515	NP_055543.2	NA	NA	NA
PH_hs_0000191	0.571626	0.0621631	0.378135	1.13271	FMO1	310.507	flavin containing monooxygenase 1	1	2326	NM_002021.1	4503754	NP_002012.1	ENSG00000010932	"ENST00000354841,ENST00000367750"	"ENSP00000346901,ENSP00000356724"
PH_hs_0028421	0.76093	0.107821	0.263996	1.12781	LOC340515	1911.08	uncharacterized LOC340515	1	340515	NR_034157.1	301069356	-	NA	NA	NA
PH_hs_0039663	-0.551992	-0.0379516	-0.489993	-1.1323	ZNF765	222.751	zinc finger protein 765	1	91661	NM_001040185.1	93277109	NP_001035275.1	ENSG00000196417	ENST00000396408	ENSP00000379689
PH_hs_0049068	-0.499375	-0.0630066	-0.493906	-1.13116	ZNF268	140.703	zinc finger protein 268	1	10795	"NM_001165884.2,NM_001165882.2,NM_001165881.2,NM_001165887.1,NM_001165886.1,NM_001165885.1,NM_001165883.1,NM_152943.2,NM_003415.2"	298358579;298358576;298358568;259490342;259490338;259490334;259490326;259490311;259490308	"NP_001159356.2,NP_001159354.1,NP_001159353.1,NP_001159359.1,NP_001159358.1,NP_001159357.1,NP_001159355.1,NP_694422.2,NP_003406.1"	ENSG00000090612	ENST00000536435	ENSP00000444412
PH_hs_0028484	-0.843756	-0.0245356	-0.164594	-1.05199	FAM177A1	205.84	"family with sequence similarity 177, member A1"	1	283635	"NM_001079519.1,NM_173607.3"	118498365;118498370	"NP_001072987.1,NP_775878.2"	NA	NA	NA
PH_hs_0028567	0.663364	0.0859476	0.375482	1.23462	APOC4	166.775	apolipoprotein C-IV	1	346	NM_001646.2	325651851	NP_001637.1	ENSG00000267467|ENSG00000224916	ENST00000592954|ENST00000436871	ENSP00000468236|ENSP00000412935
PH_hs_0023582	-0.662877	-0.0961136	-0.26617	-1.12762	RAB27A	84.775	"RAB27A, member RAS oncogene family"	1	5873	"NM_183234.2,NM_004580.4,NM_183236.2,NM_183235.2"	332078504;332078501;332078500;332078499	"NP_899057.1,NP_004571.2,NP_899059.1,NP_899058.1"	ENSG00000069974	ENST00000336787	ENSP00000337761
PH_hs_0014669	-0.618078	-0.148885	-0.310284	-1.12643	KIAA1704	190.835	KIAA1704	1	55425	NM_018559.2	33354278	NP_061029.2	ENSG00000133114	"ENST00000357537,ENST00000379151"	"ENSP00000350145,ENSP00000368447"
PH_hs_0041102	-0.386418	-0.280651	-0.320824	-1.12571	ZFP62	86.3046	ZFP62 zinc finger protein	1	643836	"NM_001172638.1,NM_152283.4"	289547561;289547559	"NP_001166109.1,NP_689496.4"	ENSG00000196670	"ENST00000509066,ENST00000506439,ENST00000504225"	"ENSP00000424156,ENSP00000423709,ENSP00000422987"
PH_hs_0061077	0.411604	0.484013	0.185086	1.12475	SCAF1	876.526	SR-related CTD-associated factor 1	1	58506	NM_021228.2	226509739	NP_067051.2	ENSG00000126461	ENST00000598359	ENSP00000473210
PH_hs_0030285	0.377044	0.205562	0.31551	1.00525	TBXA2R	411.577	thromboxane A2 receptor	1	6915	NM_201636.2	260593680	NP_963998.2	ENSG00000006638	ENST00000411851	ENSP00000393333
PH_hs_0022471	-0.532142	-0.213148	-0.313788	-1.12389	ZNF566	157.851	zinc finger protein 566	1	84924	"NM_001145345.1,NM_032838.4,NM_001145344.1,NM_001145343.1"	223890214;223890213;223890211;223890209	"NP_001138817.1,NP_116227.1,NP_001138816.1,NP_001138815.1"	ENSG00000186017	"ENST00000424129,ENST00000392170"	"ENSP00000401259,ENSP00000376010"
PH_hs_0016918	0.981153	0.169033	0.025999	1.12063	STAU2-AS1	865.208	STAU2 antisense RNA 1	1	100128126	NR_038406.1	336088628	-	NA	NA	NA
PH_hs_0030610	-0.175938	-0.180593	-0.828465	-1.28838	ZBTB33	229.024	zinc finger and BTB domain containing 33	1	10009	"NM_001184742.1,NM_006777.3"	296179375;41152068	"NP_001171671.1,NP_006768.1"	ENSG00000269603|ENSG00000177485	ENST00000602186|ENST00000557385	ENSP00000470483|ENSP00000450969
PH_hs_0034165	-0.344266	-0.336273	-0.286174	-1.11816	ZNF836	76.8053	zinc finger protein 836	1	162962	NM_001102657.1	156627572	NP_001096127.1	ENSG00000196267	"ENST00000322146,ENST00000597252"	"ENSP00000325038,ENSP00000470239"
PH_hs_0061724	-0.471696	-0.260574	-0.290941	-1.11768	USP45	114.327	ubiquitin specific peptidase 45	1	85015	NM_001080481.1	122937411	NP_001073950.1	NA	NA	NA
PH_hs_0031211	-0.724359	-0.0164179	-0.277502	-1.09198	ELAC1	65.7764	elaC homolog 1 (E. coli)	1	55520	NM_018696.2	50726987	NP_061166.1	ENSG00000141642	ENST00000269466	ENSP00000269466
PH_hs_0031287	-0.741312	-0.0727467	-0.226372	-1.09779	previous version conserved probe	130.215	NA	7	NA	NA	NA	NA	NA	NA	NA
PH_hs_0031489	1.15968	0.0246707	0.155574	1.28152	BNC2	53.0126	basonuclin 2	1	54796	NM_017637.5	94721326	NP_060107.3	ENSG00000173068	ENST00000380672	ENSP00000370047
PH_hs_0048820	-0.00783846	-0.230098	-0.805451	-1.11738	FIP1L1	273.974	FIP1 like 1 (S. cerevisiae)	1	81608	"NM_001134938.1,NM_001134937.1,NM_030917.3"	201023340;201023338;201023337	"NP_001128410.1,NP_001128409.1,NP_112179.2"	ENSG00000145216	ENST00000504094	ENSP00000421691
PH_hs_0016308	-0.344594	-0.278251	-0.407824	-1.11647	GINS4	189.781	GINS complex subunit 4 (Sld5 homolog)	1	84296	NM_032336.2	223029408	NP_115712.1	ENSG00000147536	"ENST00000518671,ENST00000520354"	"ENSP00000428754,ENSP00000429894"
PH_hs_0002926	0.664097	0.150273	0.31539	1.11584	ALPI	8412.37	"alkaline phosphatase, intestinal"	1	248	NM_001631.3	157266291	NP_001622.2	ENSG00000163295	ENST00000295463	ENSP00000295463
PH_hs_0031827	-0.567014	-0.153176	-0.289242	-1.06336	previous version conserved probe	201.172	NA	7	NA	NA	NA	NA	NA	NA	NA
PH_hs_0031799	0.777226	0.0218335	0.323502	1.11542	LGALS16|LGALS14|LGALS13	2971.23	"lectin, galactoside-binding, soluble, 16|lectin, galactoside-binding, soluble, 14|lectin, galactoside-binding, soluble, 13"	4	148003|56891|29124	"NM_001190441.1|NM_203471.1,NM_020129.2|NM_013268.2"	298919184|45439324;45439323|20302163	"NP_001177370.1|NP_982297.1,NP_064514.1|NP_037400.1"	ENSG00000249861|ENSG00000006659|ENSG00000105198	"ENST00000594480,ENST00000392051|ENST00000392052|ENST00000221797"	"ENSP00000471564,ENSP00000375904|ENSP00000375905|ENSP00000221797"
PH_hs_0062044	0.477658	0.0444212	0.47345	1.11467	FCGR1A|FCGR1B	369.097	"Fc fragment of IgG, high affinity Ia, receptor (CD64)|Fc fragment of IgG, high affinity Ib, receptor (CD64)"	4	2209|2210	"NM_000566.3|NM_001004340.3,NM_001017986.3,NR_045213.1"	167621452|349732138;349732137;349732146	"NP_000557.1|NP_001004340.2,NP_001017986.1,-"	ENSG00000266332|ENSG00000150337	ENST00000580698|ENST00000369168	ENSP00000462402|ENSP00000358165
PH_hs_0018936	-0.739106	-0.0234064	-0.309755	-1.11359	PNPT1	150.254	polyribonucleotide nucleotidyltransferase 1	1	87178	NM_033109.4	429484497	NP_149100.2	ENSG00000138035	"ENST00000260604,ENST00000415374"	"ENSP00000260604,ENSP00000393953"
PH_hs_0027286	0.176754	0.124344	0.635045	1.11133	ZNF671	257.035	zinc finger protein 671	1	79891	NM_024833.2	190610005	NP_079109.2	ENSG00000083814	"ENST00000317398,ENST00000600125"	"ENSP00000321848,ENSP00000471087"
PH_hs_0005767	0.658571	0.208918	0.235011	1.10886	MUC7	1473.4	"mucin 7, secreted"	1	4589	"NM_001145007.1,NM_001145006.1,NM_152291.2"	222418648;222418646;222418644	"NP_001138479.1,NP_001138478.1,NP_689504.2"	ENSG00000171195	"ENST00000456088,ENST00000413702,ENST00000304887"	"ENSP00000400585,ENSP00000407422,ENSP00000302021"
PH_hs_0028045	-0.465605	-0.193435	-0.371422	-1.1085	GXYLT1	143.081	glucoside xylosyltransferase 1	1	283464	"NM_001099650.1,NM_173601.1"	153791275;153791361	"NP_001093120.1,NP_775872.1"	NA	NA	NA
PH_hs_0062320	0.665831	0.00472007	0.424617	1.10635	SPATA1	1863.57	spermatogenesis associated 1	1	100505741	"XM_003960123.1,XM_003118960.3,XM_003119805.3"	410171199;397138886;397138015	"XP_003960172.1,XP_003119008.3,XP_003119853.3"	NA	NA	NA
PH_hs_0060458	0.387966	0.0136153	0.546736	1.10501	AGAP1	242.804	"ArfGAP with GTPase domain, ankyrin repeat and PH domain 1"	1	116987	NM_001244888.1	349585206	NP_001231817.1	ENSG00000157985	ENST00000409457	ENSP00000387174
PH_hs_0033153	0.677225	0.160062	0.237096	1.14433	LOC151009	452.072	uncharacterized LOC151009	1	151009	NR_027244.1	224586908	-	NA	NA	NA
PH_hs_0033198	0.526532	0.0255155	0.447133	1.05123	previous version conserved probe	514.359	NA	7	NA	NA	NA	NA	NA	NA	NA
PH_hs_0002414	-0.524866	-0.0642418	-0.447599	-1.10332	CACYBP	174.96	calcyclin binding protein	1	27101	"NM_014412.2,NM_001007214.1"	55925645;60218912	"NP_055227.1,NP_001007215.1"	ENSG00000116161	"ENST00000367679,ENST00000367681"	"ENSP00000356652,ENSP00000356654"
PH_hs_0033370	-0.32115	-0.300625	-0.2626	-1.03329	WDR37	87.7316	WD repeat domain 37	1	22884	NM_014023.3	71164896	NP_054742.2	ENSG00000047056	"ENST00000436154,ENST00000381329"	"ENSP00000404346,ENSP00000370730"
PH_hs_0033499	-0.412922	-0.189945	-0.905463	-1.64422	C4orf21	102.045	chromosome 4 open reading frame 21	1	55345	NM_018392.4	254826808	NP_060862.3	ENSG00000138658	"ENST00000445413,ENST00000505019"	"ENSP00000404365,ENSP00000424737"
PH_hs_0033613	1.01805	0.13435	0.436479	1.73878	NA	176.524	NA	1	NA	NA	NA	NA	ENSG00000218672	ENST00000401499	ENSP00000384676
PH_hs_0033626	0.887229	0.145957	0.0515342	1.06622	NA	61.5333	NA	5	NA	NA	NA	NA	NA	NA	NA
PH_hs_0033796	0.857605	0.176129	0.0484468	1.07433	NA	1316.39	NA	5	NA	NA	NA	NA	NA	NA	NA
PH_hs_0002631	-0.474069	-0.150175	-0.411509	-1.103	LZTFL1	135.509	leucine zipper transcription factor-like 1	1	54585	NM_020347.2	56676319	NP_065080.1	NA	NA	NA
PH_hs_0035583	0.655963	0.139439	0.284604	1.10276	NIPAL1	798.551	NIPA-like domain containing 1	1	152519	NM_207330.1	46409301	NP_997213.1	NA	NA	NA
PH_hs_0034260	0.0532472	0.112307	1.24609	1.45763	ACTR2	1165.32	ARP2 actin-related protein 2 homolog (yeast)	1	10097	"NM_005722.3,NM_001005386.2"	205361120;205361119	"NP_005713.1,NP_001005386.1"	ENSG00000138071	ENST00000377982	ENSP00000367220
PH_hs_0016070	-0.173551	-0.0916139	-0.741535	-1.10152	RAMP2-AS1	258.976	RAMP2 antisense RNA 1	1	100190938	"NR_024462.1,NR_024461.1"	213385284;213385281	-	NA	NA	NA
PH_hs_0040675	-0.655951	-0.262383	-0.140799	-1.09981	ZNF33A	245.479	zinc finger protein 33A	1	7581	"NM_006974.2,NM_006954.1"	110347444;110347445	"NP_008905.1,NP_008885.1"	NA	NA	NA
PH_hs_0023569	-0.597083	-0.0187473	-0.433933	-1.09789	RUFY2	226.043	RUN and FYVE domain containing 2	1	55680	"NM_017987.4,NM_001042417.1"	109240555;109240551	"NP_060457.4,NP_001035882.1"	ENSG00000204130	"ENST00000454950,ENST00000466493"	"ENSP00000404986,ENSP00000433197"
PH_hs_0026466	-0.551256	-0.192819	-0.2911	-1.09712	NEGR1	145.011	neuronal growth regulator 1	1	257194	NM_173808.2	66346705	NP_776169.2	NA	NA	NA
PH_hs_0046542	0.611387	0.213165	0.238114	1.09379	KRTAP5-7	518.623	keratin associated protein 5-7	1	440050	NM_001012503.1	60279696	NP_001012521.1	ENSG00000244411|ENSG00000172890	ENST00000398536|ENST00000526622	ENSP00000417330|ENSP00000432217
PH_hs_0035581	-0.0742174	-0.288361	-0.60566	-1.12637	previous version conserved probe	99.5578	NA	7	NA	NA	NA	NA	NA	NA	NA
PH_hs_0028168	-0.124721	-0.190281	-0.672377	-1.09373	ZNF426	180.37	zinc finger protein 426	1	79088	NM_024106.1	13129115	NP_077011.1	NA	NA	NA
PH_hs_0000011	0.329945	0.350803	0.364564	1.09324	IL1RL1	810.234	interleukin 1 receptor-like 1	1	9173	NM_003856.2	27894327	NP_003847.2	ENSG00000115602	ENST00000409584	ENSP00000386618
PH_hs_0035613	-0.36826	-0.31256	-0.322036	-1.07643	TEAD1	193.018	TEA domain family member 1 (SV40 transcriptional enhancer factor)	1	7003	NM_021961.5	296434318	NP_068780.2	NA	NA	NA
PH_hs_0046172	-0.280541	-0.266231	-0.506437	-1.0916	ALS2CR8	382.983	"amyotrophic lateral sclerosis 2 (juvenile) chromosome region, candidate 8"	1	79800	"NM_024744.14,NM_001104586.1"	157168370;157168371	"NP_079020.13,NP_001098056.1"	ENSG00000138380	ENST00000320443	ENSP00000316224
PH_hs_0035649	-0.433704	-0.239238	-0.370157	-1.13163	previous version conserved probe	210.709	NA	7	NA	NA	NA	NA	NA	NA	NA
PH_hs_0035791	-0.746944	-0.00249042	-0.310319	-1.10574	ZNF354B	144.471	zinc finger protein 354B	1	117608	NM_058230.2	207450730	NP_478137.1	NA	NA	NA
PH_hs_0013146	0.537125	0.156657	0.359372	1.09146	GABRA4	900.819	"gamma-aminobutyric acid (GABA) A receptor, alpha 4"	1	2557	"NM_001204267.1,NM_001204266.1,NM_000809.3"	324021690;324021687;324021686	"NP_001191196.1,NP_001191195.1,NP_000800.2"	ENSG00000109158	ENST00000264318	ENSP00000264318
PH_hs_0035911	-0.716054	-0.371993	-0.0120415	-1.16217	previous version conserved probe	151.475	NA	7	NA	NA	NA	NA	NA	NA	NA
PH_hs_0028435	-0.116636	-0.0247743	-0.827767	-1.09041	ITGAV	145.46	"integrin, alpha V"	1	3685	"NM_001145000.1,NM_001144999.1,NM_002210.3"	223468596;223468594;223468593	"NP_001138472.1,NP_001138471.1,NP_002201.1"	NA	NA	NA
PH_hs_0042628	0.44523	0.350537	0.161752	1.09016	OR5AN1	435.729	"olfactory receptor, family 5, subfamily AN, member 1"	1	390195	NM_001004729.1	52317110	NP_001004729.1	ENSG00000176495	ENST00000313940	ENSP00000320302
PH_hs_0032792	0.705311	0.15824	0.223398	1.08829	ARSH	3110.47	"arylsulfatase family, member H"	1	347527	NM_001011719.1	58743318	NP_001011719.1	ENSG00000205667	ENST00000381130	ENSP00000370522
PH_hs_0062059	0.614422	0.0960018	0.381405	1.08677	KRTAP5-2|KRTAP5-11|KRTAP5-10	1725.12	keratin associated protein 5-2|keratin associated protein 5-11|keratin associated protein 5-10	4	440021|440051|387273	"NM_001004325.1|NM_001005405.2|XM_003846553.1,NM_001012710.1"	51972219|123173798|397137318;60593039	"NP_001004325.1|NP_001005405.1|XP_003846601.1,NP_001012728.1"	ENSG00000205867|ENSG00000187811|ENSG00000204571|ENSG00000204572	ENST00000412090|ENST00000343767|ENST00000398530|ENST00000398531	ENSP00000400041|ENSP00000345469|ENSP00000381541|ENSP00000381542
PH_hs_0036187	-0.513695	-0.261724	-0.359714	-1.2538	C17orf104	108.735	chromosome 17 open reading frame 104	1	284071	NM_001145080.2	274315852	NP_001138552.2	ENSG00000180336	ENST00000359945	ENSP00000353028
PH_hs_0036198	-0.483066	-0.289316	-0.20406	-1.08314	previous version conserved probe	88.5152	NA	7	NA	NA	NA	NA	NA	NA	NA
PH_hs_0004305	0.681573	0.29969	0.0329542	1.08631	ITIH2	422.082	inter-alpha-trypsin inhibitor heavy chain 2	1	3698	NM_002216.2	70778917	NP_002207.2	ENSG00000151655	"ENST00000379587,ENST00000358415"	"ENSP00000368906,ENSP00000351190"
PH_hs_0046346	0.732512	0.277345	0.0806725	1.0835	ZNF326	1244.68	zinc finger protein 326	1	284695	NM_182975.2	156523256	NP_892020.1	ENSG00000162664	ENST00000361911	ENSP00000355318
PH_hs_0036724	-0.447284	-0.0734731	-0.409919	-1.00007	previous version conserved probe	159.291	NA	7	NA	NA	NA	NA	NA	NA	NA
PH_hs_0037849	-0.811996	-0.0325364	-0.109073	-1.00032	KIF27	62.4605	kinesin family member 27	1	55582	"NM_001271928.1,NM_001271927.1,NM_017576.2"	429535823;429535821;429535820	"NP_001258857.1,NP_001258856.1,NP_060046.1"	ENSG00000165115	"ENST00000334204,ENST00000413982,ENST00000297814"	"ENSP00000333928,ENSP00000401688,ENSP00000297814"
PH_hs_0038260	-0.840037	-0.564027	-0.00224569	-1.56257	previous version conserved probe	97.3849	NA	7	NA	NA	NA	NA	NA	NA	NA
PH_hs_0024000	-0.627756	-0.11395	-0.231766	-1.08266	TNFAIP8L1	92.5257	"tumor necrosis factor, alpha-induced protein 8-like 1"	1	126282	"NM_152362.2,NM_001167942.1"	269846917;269846911	"NP_689575.2,NP_001161414.1"	NA	NA	NA
PH_hs_0038657	-0.348596	-0.220115	-0.376534	-1.04002	NXPH2	45.4536	neurexophilin 2	1	11249	NM_007226.2	221307582	NP_009157.1	NA	NA	NA
PH_hs_0000991	0.0730048	0.293198	0.648893	1.08135	ANGPTL4	1071.84	angiopoietin-like 4	1	51129	"NM_001039667.1,NM_139314.1"	89264695;21536397	"NP_001034756.1,NP_647475.1"	ENSG00000167772	"ENST00000541807,ENST00000593998,ENST00000393962,ENST00000595079,ENST00000301455"	"ENSP00000439833,ENSP00000472551,ENSP00000377534,ENSP00000473025,ENSP00000301455"
PH_hs_0001462	-0.747546	-0.191124	-0.0405556	-1.08019	NOM1	106.679	nucleolar protein with MIF4G domain 1	1	64434	NM_138400.1	61097911	NP_612409.1	ENSG00000146909	ENST00000275820	ENSP00000275820
PH_hs_0038824	0.854716	0.0186636	0.694542	1.69719	previous version conserved probe	404.538	NA	7	NA	NA	NA	NA	NA	NA	NA
PH_hs_0061025	0.42418	0.223472	0.371469	1.07733	PABPC5	707.982	"poly(A) binding protein, cytoplasmic 5"	1	140886	NM_080832.2	211904087	NP_543022.1	ENSG00000174740	ENST00000373105	ENSP00000362197
PH_hs_0045561	0.670491	0.0794383	0.336118	1.07303	DBNDD2	2133.56	dysbindin (dystrobrevin binding protein 1) domain containing 2	1	55861	"NM_018478.3,NM_001048226.2,NM_001048225.2"	308199489;308199479;308199477	"NP_060948.3,NP_001041691.2,NP_001041690.2"	ENSG00000244274	"ENST00000443296,ENST00000372710,ENST00000372720"	"ENSP00000414161,ENSP00000361795,ENSP00000361805"
PH_hs_0002190	0.388733	0.4596	0.060526	1.07279	RGS5	311056	regulator of G-protein signaling 5	1	8490	"NM_001254748.1,NM_001254749.1,NM_003617.3,NM_001195303.2"	363001420;363001550;295842286;363001422	"NP_001241677.1,NP_001241678.1,NP_003608.1,NP_001182232.1"	NA	NA	NA
PH_hs_0039717	-0.831368	-0.225776	-0.0869096	-1.29195	previous version conserved probe	53.4232	NA	7	NA	NA	NA	NA	NA	NA	NA
PH_hs_0039935	-0.650593	-0.0232464	-0.345306	-1.10624	previous version conserved probe	71.4706	NA	7	NA	NA	NA	NA	NA	NA	NA
PH_hs_0040086	-0.428848	-0.206511	-0.402885	-1.12755	previous version conserved probe	119.713	NA	7	NA	NA	NA	NA	NA	NA	NA
PH_hs_0040179	-0.893226	-0.0214995	-0.0430597	-1.03548	previous version conserved probe	75.7514	NA	7	NA	NA	NA	NA	NA	NA	NA
PH_hs_0028869	-0.317029	-0.374831	-0.298294	-1.07033	FLRT3	204.601	fibronectin leucine rich transmembrane protein 3	1	23767	"NM_013281.3,NM_198391.2"	301129219;301129216	"NP_037413.1,NP_938205.1"	ENSG00000125848	ENST00000341420	ENSP00000339912
PH_hs_0040478	0.604122	0.0228323	0.387124	1.06348	previous version conserved probe	487.034	NA	7	NA	NA	NA	NA	NA	NA	NA
PH_hs_0040486	-0.480684	-0.143329	-0.387154	-1.06071	KIAA1841	91.0098	KIAA1841	1	84542	NM_001129993.1	194018432	NP_001123465.1	NA	NA	NA
PH_hs_0040594	-0.296014	-0.441122	-0.26559	-1.07578	previous version conserved probe	223.278	NA	7	NA	NA	NA	NA	NA	NA	NA
PH_hs_0004132	0.462933	0.0900121	0.462028	1.07031	EFCAB4A	663.545	EF-hand calcium binding domain 4A	1	283229	NM_173584.3	150170652	NP_775855.3	ENSG00000177685	"ENST00000450448,ENST00000525077,ENST00000528542"	"ENSP00000409256,ENSP00000435299,ENSP00000432334"
PH_hs_0043362	0.651392	0.067914	0.324355	1.06997	TCF23	797.781	transcription factor 23	1	150921	NM_175769.2	295821226	NP_786951.1	ENSG00000163792	ENST00000296096	ENSP00000296096
PH_hs_0040690	-0.522804	-0.0915604	-0.285183	-1.00857	TMEM67	70.1976	transmembrane protein 67	1	91147	"NM_001142301.1,NM_153704.5,NR_024522.1"	214830752;214830731;215490109	"NP_001135773.1,NP_714915.3,-"	ENSG00000164953	"ENST00000520680,ENST00000453906,ENST00000452276"	"ENSP00000428785,ENSP00000403035,ENSP00000388671"
PH_hs_0043217	-0.606278	-0.125297	-0.278298	-1.06959	FGD4	143.957	"FYVE, RhoGEF and PH domain containing 4"	1	121512	NM_139241.2	198041927	NP_640334.2	ENSG00000139132	ENST00000427716	ENSP00000394487
PH_hs_0040742	0.729161	0.0523964	0.232063	1.01592	NA	1885.98	NA	1	NA	NA	NA	NA	ENSG00000185404	ENST00000444636	ENSP00000395195
PH_hs_0025332	-0.550679	-0.0587871	-0.389736	-1.0691	FBXW8	122.926	F-box and WD repeat domain containing 8	1	26259	"NM_012174.1,NM_153348.2"	30795120;30795122	"NP_036306.1,NP_699179.2"	ENSG00000174989	ENST00000455858	ENSP00000389144
PH_hs_0040833	-0.635066	-0.210811	-0.153856	-1.13086	ZNF175	64.7738	zinc finger protein 175	1	7728	NM_007147.2	37594438	NP_009078.1	ENSG00000105497	ENST00000600460	ENSP00000469914
PH_hs_0040926	-0.0566015	-0.319367	-0.516716	-1.02898	DMTF1	116.332	cyclin D binding myb-like transcription factor 1	1	9988	"NR_024550.1,NR_024549.1"	215598858;215598846	-	ENSG00000135164	"ENST00000411766,ENST00000584619"	"ENSP00000396570,ENSP00000464092"
PH_hs_0009299	0.708675	0.175543	0.181633	1.06891	ACHE	2425.62	acetylcholinesterase	1	43	NM_015831.2	88999566	NP_056646.1	ENSG00000087085	ENST00000302913	ENSP00000303211
PH_hs_0006578	0.606933	0.187166	0.275573	1.06771	LINC00837	1517.95	long intergenic non-protein coding RNA 837	1	100507605	"NR_038376.1,NR_038375.1,NR_038374.1"	335353778;335353777;335353776	-	NA	NA	NA
PH_hs_0040972	-0.416713	-0.154696	-0.429025	-1.12436	KIAA1598	59.285	KIAA1598	1	57698	"NM_001258300.1,NM_001258299.1,NM_001258298.1,NM_018330.6,NM_001127211.2"	385198096;385198094;385198092;385198091;385198090	"NP_001245229.1,NP_001245228.1,NP_001245227.1,NP_060800.2,NP_001120683.1"	NA	NA	NA
PH_hs_0001941	0.603399	0.195822	0.285662	1.06646	MIR4500HG	9068.92	MIR4500 host gene (non-protein coding)	1	642345	NR_033829.1	299782501	-	NA	NA	NA
PH_hs_0060427	0.487334	0.281412	0.266469	1.06603	LOC100653052	805.183	putative killer cell immunoglobulin-like receptor like protein KIR3DP1-like	1	100653052	XM_003403405.2	397140272	XP_003403453.2	NA	NA	NA
PH_hs_0041081	-0.514218	-0.068265	-0.391985	-1.07285	DHFRL1	86.202	dihydrofolate reductase-like 1	1	200895	"NM_176815.4,NM_001195643.1"	307548864;307548862	"NP_789785.1,NP_001182572.1"	ENSG00000178700	ENST00000496983	ENSP00000420810
PH_hs_0061219	0.614635	0.0735669	0.370223	1.0638	MACC1	1358.14	metastasis associated in colon cancer 1	1	346389	NM_182762.3	157502190	NP_877439.3	NA	NA	NA
PH_hs_0047486	-0.899444	-0.109935	-0.0575662	-1.06363	ZNF470	223.87	zinc finger protein 470	1	388566	NM_001001668.3	154091002	NP_001001668.3	ENSG00000197016	"ENST00000391709,ENST00000330619"	"ENSP00000375590,ENSP00000333223"
PH_hs_0041157	-0.208621	-0.250505	-0.455126	-1.01745	PGAP1	60.9173	post-GPI attachment to proteins 1	1	80055	NM_024989.3	62865856	NP_079265.2	NA	NA	NA
PH_hs_0042021	0.322294	0.183886	0.365403	1.02534	C1orf68	404.802	chromosome 1 open reading frame 68	1	100129271	NM_001024679.2	194354005	NP_001019850.1	ENSG00000198854	"ENST00000368775,ENST00000362017"	"ENSP00000357764,ENSP00000354769"
PH_hs_0042242	0.393801	0.0480678	0.547531	1.0558	previous version conserved probe	97.3712	NA	7	NA	NA	NA	NA	NA	NA	NA
PH_hs_0000953	0.655674	0.232032	0.164759	1.06303	VGLL1	1016.92	vestigial like 1 (Drosophila)	1	51442	NM_016267.3	253970475	NP_057351.1	ENSG00000102243	"ENST00000456412,ENST00000370634"	"ENSP00000388868,ENSP00000359668"
PH_hs_0031733	-0.597004	-0.0498417	-0.36233	-1.06246	ZNF880	213.652	zinc finger protein 880	1	400713	NM_001145434.1	224177532	NP_001138906.1	ENSG00000221923	ENST00000422689	ENSP00000406318
PH_hs_0044969	-0.206404	-0.214278	-0.531777	-1.0578	GUSBP2	153.532	"glucuronidase, beta pseudogene 2"	1	387036	NR_003504.3	300360484	-	NA	NA	NA
PH_hs_0024613	-0.723802	-0.257906	-0.0433802	-1.05619	ANKRD11	1033.01	ankyrin repeat domain 11	1	29123	"NM_001256183.1,NM_013275.5,NM_001256182.1"	371874366;371874333;371874305	"NP_001243112.1,NP_037407.4,NP_001243111.1"	NA	NA	NA
PH_hs_0048874	0.707772	0.0423262	0.306439	1.05607	ABCG2	1374.07	"ATP-binding cassette, sub-family G (WHITE), member 2"	1	9429	"NM_004827.2,NM_001257386.1"	62526032;383792175	"NP_004818.2,NP_001244315.1"	ENSG00000118777	"ENST00000237612,ENST00000515655"	"ENSP00000237612,ENSP00000426917"
PH_hs_0042663	0.61959	0.250806	0.324196	1.21883	previous version conserved probe	1047.78	NA	7	NA	NA	NA	NA	NA	NA	NA
PH_hs_0042691	0.669648	0.0223408	0.536953	1.25778	SPEM1	91.4854	spermatid maturation 1	1	374768	NM_199339.2	116268094	NP_955371.2	ENSG00000181323	ENST00000323675	ENSP00000315554
PH_hs_0005610	0.603476	0.193684	0.261108	1.05478	BEAN1	1670.95	"brain expressed, associated with NEDD4, 1"	1	146227	"NM_001136106.4,NM_001178020.2"	363000014;362999962	"NP_001129578.1,NP_001171491.1"	ENSG00000166546	ENST00000562849	ENSP00000456822
PH_hs_0024793	-0.738274	-0.129378	-0.140728	-1.0539	THAP9	144.471	THAP domain containing 9	1	79725	NM_024672.4	198442881	NP_078948.3	ENSG00000168152	ENST00000505901	ENSP00000425966
PH_hs_0035574	-0.804347	-0.0676033	-0.133927	-1.05368	DNAJC21	117.54	"DnaJ (Hsp40) homolog, subfamily C, member 21"	1	134218	"NM_194283.3,NM_001012339.2"	68077167;68077165	"NP_919259.3,NP_001012339.2"	NA	NA	NA
PH_hs_0043738	0.608086	0.111381	0.335964	1.05273	IL9R	2939.48	interleukin 9 receptor	1	3581	"NM_176786.1,NM_002186.2"	29171683;29171681	"NP_789743.2,NP_002177.2"	ENSG00000124334	"ENST00000424344,ENST00000540897,ENST00000369423"	"ENSP00000388918,ENSP00000438112,ENSP00000358431"
PH_hs_0036111	-0.70357	-0.0460876	-0.255936	-1.05269	ZNF114	154.497	zinc finger protein 114	1	163071	NM_153608.1	23957699	NP_705836.1	ENSG00000178150	"ENST00000315849,ENST00000600687,ENST00000595607,ENST00000597695"	"ENSP00000318898,ENSP00000471727,ENSP00000469998,ENSP00000472747"
PH_hs_0040738	-0.366806	-0.15088	-0.454336	-1.05139	ZNF83	140.279	zinc finger protein 83	1	55769	"NM_018300.3,NM_001242531.1,NM_001105553.1,NM_001105551.1,NM_001242538.1,NM_001105554.1,NM_001105552.1,NM_001105550.1,NM_001105549.1"	157738650;335892862;157738660;157738656;335892883;157738662;157738658;157738654;157738652	"NP_060770.3,NP_001229460.1,NP_001099023.1,NP_001099021.1,NP_001229467.1,NP_001099024.1,NP_001099022.1,NP_001099020.1,NP_001099019.1"	NA	NA	NA
PH_hs_0042348	0.645535	0.131395	0.276526	1.05114	NPVF	1635.5	neuropeptide VF precursor	1	64111	NM_022150.3	93204874	NP_071433.3	ENSG00000105954	ENST00000222674	ENSP00000222674
PH_hs_0002992	-0.496794	-0.21164	-0.281103	-1.0511	CDK6	172.609	cyclin-dependent kinase 6	1	1021	"NM_001145306.1,NM_001259.6"	223718133;223718130	"NP_001138778.1,NP_001250.1"	ENSG00000105810	ENST00000424848	ENSP00000397087
PH_hs_0006562	0.654957	0.0749538	0.30358	1.05071	STX11	1431.24	syntaxin 11	1	8676	NM_003764.3	187423911	NP_003755.2	ENSG00000135604	ENST00000367568	ENSP00000356540
PH_hs_0043537	0.162841	0.303013	0.387613	1.02638	C20orf173	238.458	chromosome 20 open reading frame 173	1	140873	NR_026933.1	223972619	-	NA	NA	NA
PH_hs_0024920	0.677278	0.0698924	0.314054	1.0494	PADI1	2233.92	"peptidyl arginine deiminase, type I"	1	29943	NM_013358.2	122056684	NP_037490.2	ENSG00000142623	"ENST00000536552,ENST00000413717"	"ENSP00000444833,ENSP00000396697"
PH_hs_0035621	0.518815	0.330386	0.194476	1.0483	SCIMP	2367.92	SLP adaptor and CSK interacting membrane protein	1	388325	"NM_001271842.1,NM_207103.3"	427197600;427197599	"NP_001258771.1,NP_996986.1"	ENSG00000161929	ENST00000399600	ENSP00000382509
PH_hs_0043957	0.626431	0.083253	0.306983	1.16313	previous version conserved probe	314.733	NA	7	NA	NA	NA	NA	NA	NA	NA
PH_hs_0043960	0.587095	0.0113188	0.520089	1.2529	previous version conserved probe	166.72	NA	7	NA	NA	NA	NA	NA	NA	NA
PH_hs_0044045	0.886274	0.0164176	0.465235	1.47918	LOC154872	136.949	uncharacterized protein LOC154872	1	154872	NM_001024603.1	66912169	NP_001019774.1	NA	NA	NA
PH_hs_0044087	0.576014	0.426416	0.189366	1.32673	previous version conserved probe	401.732	NA	7	NA	NA	NA	NA	NA	NA	NA
PH_hs_0045582	0.576281	0.250924	0.17293	1.04606	PARP9	500.298	"poly (ADP-ribose) polymerase family, member 9"	1	83666	NM_001146106.1	226371717	NP_001139578.1	ENSG00000138496	ENST00000462315	ENSP00000418894
PH_hs_0020650	0.610517	0.0666903	0.377571	1.04579	GGT5	4107.34	gamma-glutamyltransferase 5	1	2687	"NM_001099782.1,NM_001099781.1,NM_004121.2"	153266906;153266900;153266884	"NP_001093252.1,NP_001093251.1,NP_004112.2"	ENSG00000099998	"ENST00000398292,ENST00000425408,ENST00000327365,ENST00000263112"	"ENSP00000381340,ENSP00000402917,ENSP00000330080,ENSP00000263112"
PH_hs_0060519	0.728917	0.0117262	0.3066	1.045	TRIM16L	1550.52	tripartite motif containing 16-like	1	147166	NM_001037330.1	82617563	NP_001032407.1	ENSG00000108448|ENSG00000221926	"ENST00000424146,ENST00000414850,ENST00000571542|ENST00000580110,ENST00000579219"	"ENSP00000399959,ENSP00000403648,ENSP00000460537|ENSP00000464072,ENSP00000463639"
PH_hs_0045383	0.343103	0.323782	0.335627	1.04388	MSH5	859.965	mutS homolog 5 (E. coli)	1	4439	"NM_025259.5,NM_172165.3,NM_172166.3,NM_002441.4"	262231785;262231787;262231784;262231783	"NP_079535.4,NP_751897.1,NP_751898.1,NP_002432.1"	ENSG00000266442|ENSG00000227314|ENSG00000255419|ENSG00000237333|ENSG00000255152|ENSG00000204410|ENSG00000266027|ENSG00000230293|ENSG00000235222|ENSG00000254405|ENSG00000264619|ENSG00000233345	"ENST00000465533,ENST00000482009|ENST00000547775,ENST00000447504,ENST00000497253,ENST00000436004,ENST00000448617,ENST00000436192,ENST00000441401,ENST00000441395|ENST00000490634,ENST00000480622|ENST00000412630,ENST00000492052,ENST00000444225,ENST00000426512,ENST00000414514,ENST00000437726,ENST00000448169|ENST00000476085,ENST00000498473|ENST00000431848,ENST00000375742,ENST00000429846,ENST0000048430…	"ENSP00000463617,ENSP00000437010|ENSP00000448368,ENSP00000406211,ENSP00000431494,ENSP00000398373,ENSP00000387609,ENSP00000406868,ENSP00000406269,ENSP00000402659|ENSP00000463789,ENSP00000454400|ENSP00000406310,ENSP00000433922,ENSP00000389840,ENSP00000409866,ENSP00000408136,ENSP00000412179,ENSP00000400820|ENSP00000435414,ENSP00000419220|ENSP00000416784,ENSP00000364894,ENSP00000406849,ENSP0000042023…
PH_hs_0044472	-0.459802	-0.335807	-0.124624	-1.04645	NAA16	91.0611	"N(alpha)-acetyltransferase 16, NatA auxiliary subunit"	1	79612	"NM_018527.3,NM_001110798.1"	325120978;160707984	"NP_060997.2,NP_001104268.1"	ENSG00000172766	ENST00000403412	ENSP00000386103
PH_hs_0044646	0.668906	0.0908587	0.30021	1.1842	TACSTD2	183.111	tumor-associated calcium signal transducer 2	1	4070	NM_002353.2	166795235	NP_002344.2	ENSG00000184292	ENST00000371225	ENSP00000360269
PH_hs_0044677	-0.81022	-0.0777469	-0.143946	-1.07218	FOXP1	142.582	forkhead box P1	1	27086	NM_001012505.1	60498986	NP_001012523.1	ENSG00000114861	ENST00000318779	ENSP00000318721
PH_hs_0023916	0.640746	0.331795	0.0700129	1.04361	CCDC27	1821.14	coiled-coil domain containing 27	1	148870	NM_152492.2	217035163	NP_689705.2	ENSG00000162592	"ENST00000462521,ENST00000294600"	"ENSP00000463275,ENSP00000294600"
PH_hs_0035609	-0.0824289	-0.387424	-0.457161	-1.04235	ETV1	175.128	ets variant 1	1	2115	"NM_001163150.1,NM_001163152.1,NM_001163151.1,NM_001163149.1,NM_001163148.1,NM_001163147.1,NM_004956.4"	253683432;253683436;253683434;253683430;253683428;253683426;253683425	"NP_001156622.1,NP_001156624.1,NP_001156623.1,NP_001156621.1,NP_001156620.1,NP_001156619.1,NP_004947.2"	NA	NA	NA
PH_hs_0043272	-0.509629	-0.104355	-0.368121	-1.04194	DDTL	166.245	D-dopachrome tautomerase-like	1	100037417	NM_001084393.1	145386558	NP_001077862.1	ENSG00000099974	ENST00000215770	ENSP00000215770
PH_hs_0010921	-0.487845	-0.198316	-0.280863	-1.04146	KATNAL1	155.435	katanin p60 subunit A-like 1	1	84056	"NM_032116.4,NM_001014380.2"	387849031;387762674	"NP_115492.1,NP_001014402.1"	ENSG00000102781	ENST00000380617	ENSP00000369991
PH_hs_0045148	-0.361893	-0.018543	-0.681374	-1.12049	KIAA0825	47.6778	KIAA0825	1	285600	NM_173665.2	197100792	NP_775936.1	ENSG00000185261	ENST00000329378	ENSP00000331385
PH_hs_0045204	0.679751	0.0574385	0.354362	1.11094	previous version conserved probe	1166.66	NA	7	NA	NA	NA	NA	NA	NA	NA
PH_hs_0023265	-0.765717	-0.0321016	-0.174523	-1.04129	ZCCHC2	97.3849	"zinc finger, CCHC domain containing 2"	1	54877	NM_017742.4	170016068	NP_060212.4	ENSG00000141664	"ENST00000586834,ENST00000269499"	"ENSP00000464791,ENSP00000269499"
PH_hs_0061673	0.605779	0.0420563	0.345656	1.0408	IPCEF1	661.143	interaction protein for cytohesin exchange factors 1	1	26034	"NM_001130700.1,NM_001130699.1,NM_015553.2"	194733752;194733746;195947410	"NP_001124172.1,NP_001124171.1,NP_056368.1"	ENSG00000074706	ENST00000422970	ENSP00000394751
PH_hs_0043701	-0.317122	-0.362386	-0.254864	-1.04006	PPP1R37	192.032	"protein phosphatase 1, regulatory subunit 37"	1	284352	NM_019121.1	338797735	NP_061994.1	ENSG00000104866	"ENST00000421905,ENST00000221462"	"ENSP00000390861,ENSP00000221462"
PH_hs_0045460	0.547892	0.155453	0.343076	1.05039	NA	1627.58	NA	1	NA	NA	NA	NA	ENSG00000228267	ENST00000546441	ENSP00000450261
PH_hs_0042652	-0.612305	-0.0633954	-0.306209	-1.04	MBOAT4	131.628	membrane bound O-acyltransferase domain containing 4	1	619373	NM_001100916.1	189571628	NP_001094386.1	NA	NA	NA
PH_hs_0042913	0.432213	0.0381124	0.507871	1.03974	OR6C65	542.172	"olfactory receptor, family 6, subfamily C, member 65"	1	403282	NM_001005518.1	53933281	NP_001005518.1	ENSG00000205328	ENST00000379665	ENSP00000368986
PH_hs_0000089	0.450779	0.26046	0.302182	1.03867	GATA1	920.961	GATA binding protein 1 (globin transcription factor 1)	1	2623	NM_002049.3	183227689	NP_002040.1	ENSG00000267841|ENSG00000102145	"ENST00000599393,ENST00000596219,ENST00000596667|ENST00000447551,ENST00000376665,ENST00000376670"	"ENSP00000469331,ENSP00000472899,ENSP00000469059|ENSP00000404985,ENSP00000365853,ENSP00000365858"
PH_hs_0045585	-0.768482	-0.000478212	-0.247947	-1.08898	RPAIN	66.7277	RPA interacting protein	1	84268	"NR_027679.1,NM_001160243.1"	237858710;237858697	"-,NP_001153715.1"	NA	NA	NA
PH_hs_0038333	0.71713	0.111403	0.213783	1.0385	CD3D	6555.39	"CD3d molecule, delta (CD3-TCR complex)"	1	915	"NM_001040651.1,NM_000732.4"	98985800;98985799	"NP_001035741.1,NP_000723.1"	ENSG00000167286	ENST00000300692	ENSP00000300692
PH_hs_0005132	-0.570267	-0.115422	-0.302984	-1.03756	NF1	168.315	neurofibromin 1	1	4763	"NM_001042492.2,NM_000267.3"	270132520;270132515	"NP_001035957.1,NP_000258.1"	ENSG00000196712	"ENST00000456735,ENST00000579081"	"ENSP00000389907,ENSP00000462408"
PH_hs_0045795	0.244713	0.166411	0.515299	1.063	previous version conserved probe	357.733	NA	7	NA	NA	NA	NA	NA	NA	NA
PH_hs_0040357	0.625751	0.147483	0.259544	1.03731	SERPINC1	2153.43	"serpin peptidase inhibitor, clade C (antithrombin), member 1"	1	462	NM_000488.3	254588059	NP_000479.1	NA	NA	NA
PH_hs_0042860	0.722304	0.0311661	0.285822	1.03724	OR5B21	1543.72	"olfactory receptor, family 5, subfamily B, member 21"	1	219968	NM_001005218.1	57634529	NP_001005218.1	ENSG00000198283	ENST00000360374	ENSP00000353537
PH_hs_0046229	-0.651954	-0.150947	-0.21857	-1.08053	H2AFV	130.28	"H2A histone family, member V"	1	94239	"NM_012412.4,NM_201516.2,NM_201517.2,NM_201436.2"	149999596;149999600;149999598;149999599	"NP_036544.1,NP_958924.1,NP_958925.1,NP_958844.1"	NA	NA	NA
PH_hs_0013302	0.668726	0.135581	0.231146	1.03703	SLC22A7	2691.67	"solute carrier family 22 (organic anion transporter), member 7"	1	10864	"NM_153320.2,NM_006672.3"	90669190;90669131	"NP_696961.2,NP_006663.2"	ENSG00000137204	"ENST00000372585,ENST00000372589"	"ENSP00000361666,ENSP00000361670"
PH_hs_0030111	0.800905	0.00381296	0.260107	1.03576	ADAMTSL4	4557.63	ADAMTS-like 4	1	54507	NM_019032.4	83281433	NP_061905.2	ENSG00000143382	"ENST00000271643,ENST00000369038"	"ENSP00000271643,ENSP00000358034"
PH_hs_0006991	0.659616	0.183985	0.214678	1.03489	DEFB126	4735.09	"defensin, beta 126"	1	81623	NM_030931.2	30061484	NP_112193.1	ENSG00000125788	ENST00000382398	ENSP00000371835
PH_hs_0031081	-0.640094	-0.270911	-0.0247608	-1.03253	LIN28B	140.344	lin-28 homolog B (C. elegans)	1	389421	NM_001004317.3	392513692	NP_001004317.1	NA	NA	NA
PH_hs_0043498	0.479646	0.183908	0.341179	1.03113	SIRPB1	868.013	signal-regulatory protein beta 1	1	10326	"NM_006065.3,NM_001083910.2"	223941791;223941789	"NP_006056.2,NP_001077379.1"	ENSG00000101307	"ENST00000381603,ENST00000381605,ENST00000262929"	"ENSP00000371016,ENSP00000371018,ENSP00000262929"
PH_hs_0046641	0.682749	0.0496632	0.322281	1.05041	LOC100996383	2839.58	uncharacterized LOC100996383	1	100996383	XM_003846427.1	397140015	XP_003846475.1	NA	NA	NA
PH_hs_0046660	0.566374	0.0953403	0.416273	1.10053	NA	1084.18	NA	5	NA	NA	NA	NA	NA	NA	NA
PH_hs_0046662	0.64782	0.0722501	0.334246	1.0549	previous version conserved probe	1862.04	NA	7	NA	NA	NA	NA	NA	NA	NA
PH_hs_0046687	0.204282	0.0296943	0.708524	1.04516	LOC284581|LOC100507032	678.799	uncharacterized LOC284581|uncharacterized LOC100507032	4	284581|100507032	"NR_046098.1,NR_046097.1|NR_037893.1"	373838762;373838759|323635450	-|-	NA	NA	NA
PH_hs_0046690	0.317352	0.121132	0.464477	1.09213	previous version conserved probe	272.842	NA	7	NA	NA	NA	NA	NA	NA	NA
PH_hs_0046751	0.54846	0.203407	0.326168	1.14383	previous version conserved probe	497.109	NA	7	NA	NA	NA	NA	NA	NA	NA
PH_hs_0046951	0.750874	0.0382342	0.315261	1.09605	previous version conserved probe	2470.53	NA	7	NA	NA	NA	NA	NA	NA	NA
PH_hs_0047101	0.656149	0.0695139	0.448539	1.16127	NA	6997.66	NA	5	NA	NA	NA	NA	NA	NA	NA
PH_hs_0047173	0.556495	0.264416	0.294887	1.09512	NA	3554.32	NA	5	NA	NA	NA	NA	NA	NA	NA
PH_hs_0047196	0.802538	0.132525	0.0877892	1.12038	KRT19P2	199.858	keratin 19 pseudogene 2	1	160313	NR_036685.1	308736978	-	NA	NA	NA
PH_hs_0047200	0.490463	0.0417603	0.517616	1.10018	NA	607.46	NA	1	NA	NA	NA	NA	ENSG00000227782	ENST00000442828	ENSP00000396858
PH_hs_0047329	-0.8321	-0.173267	-0.030686	-1.01416	INTS8	164.547	integrator complex subunit 8	1	55656	"NM_017864.3,NR_073445.1,NR_073444.1"	422398947;422399075;422399074	"NP_060334.2,-"	ENSG00000164941	"ENST00000447247,ENST00000523206,ENST00000343161"	"ENSP00000398203,ENSP00000429452,ENSP00000343274"
PH_hs_0047396	-0.4199	-0.156031	-0.403189	-1.09897	ZNF507	81.9861	zinc finger protein 507	1	22847	"NM_001136156.1,NM_014910.4"	209954810;209954809	"NP_001129628.1,NP_055725.2"	ENSG00000168813	ENST00000311921	ENSP00000312277
PH_hs_0025182	-0.634201	-0.279537	-0.0458921	-1.0296	SMC5	110.522	structural maintenance of chromosomes 5	1	23137	NM_015110.3	155722984	NP_055925.2	NA	NA	NA
PH_hs_0047700	0.267061	0.578923	0.133947	1.08576	LGI2	44.8889	"leucine-rich repeat LGI family, member 2"	1	55203	NM_018176.3	195539333	NP_060646.2	ENSG00000153012	ENST00000382114	ENSP00000371548
PH_hs_0003518	0.633447	0.28035	0.100545	1.02858	KLK5	1233.8	kallikrein-related peptidase 5	1	25818	"NM_001077492.1,NM_001077491.1,NM_012427.4"	117306175;117306171;117306170	"NP_001070960.1,NP_001070959.1,NP_036559.1"	ENSG00000167754	"ENST00000593428,ENST00000336334,ENST00000391809"	"ENSP00000471966,ENSP00000337733,ENSP00000375685"
PH_hs_0048705	0.56192	0.0663056	0.357621	1.14984	GLI3	200.358	GLI family zinc finger 3	1	2737	NM_000168.5	195947346	NP_000159.3	ENSG00000106571	ENST00000395925	ENSP00000379258
PH_hs_0017505	-0.25442	-0.0465588	-0.624936	-1.02743	MAN1A2	154.986	"mannosidase, alpha, class 1A, member 2"	1	10905	NM_006699.3	46852167	NP_006690.1	NA	NA	NA
PH_hs_0028471	0.404254	0.191624	0.355107	1.02472	FMOD	634.044	fibromodulin	1	2331	NM_002023.3	71040110	NP_002014.2	NA	NA	NA
PH_hs_0029550	-0.489881	-0.238768	-0.209645	-1.02399	KRR1	104.017	"KRR1, small subunit (SSU) processome component, homolog (yeast)"	1	11103	NM_007043.6	117676402	NP_008974.5	ENSG00000111615	ENST00000229214	ENSP00000229214
PH_hs_0030563	0.714475	0.0202013	0.28297	1.02245	MUC4	931.911	"mucin 4, cell surface associated"	1	4585	NM_018406.6	336285427	NP_060876.5	NA	NA	NA
PH_hs_0049347	0.177758	0.158527	0.815401	1.26553	GRIA1	102.822	"glutamate receptor, ionotropic, AMPA 1"	1	2890	"NM_001258023.1,NM_001258022.1,NM_001258021.1,NM_001258020.1,NM_001258019.1,NM_001114183.1,NM_000827.3,NR_047578.1"	384381491;384381489;384381487;384381485;384381483;167001483;167001418;384381493	"NP_001244952.1,NP_001244951.1,NP_001244950.1,NP_001244949.1,NP_001244948.1,NP_001107655.1,NP_000818.2,-"	NA	NA	NA
PH_hs_0049446	0.249604	0.26412	0.355813	1.02785	OVOL1	166.063	ovo-like 1(Drosophila)	1	5017	NM_004561.3	342349332	NP_004552.2	ENSG00000172818	ENST00000335987	ENSP00000337862
PH_hs_0049540	-0.608534	-0.13037	-0.193003	-1.00239	ASAH2B|ASAH2	57.9607	N-acylsphingosine amidohydrolase (non-lysosomal ceramidase) 2B|N-acylsphingosine amidohydrolase (non-lysosomal ceramidase) 2	4	653308|56624	"NM_001079516.1|NM_019893.2,NM_001143974.1"	118442844|221218980;221307474	"NP_001072984.1|NP_063946.2,NP_001137446.1"	ENSG00000072444|ENSG00000204147|ENSG00000188611	"ENST00000426610|ENST00000185907,ENST00000374006|ENST00000443575,ENST00000447815"	"ENSP00000399947|ENSP00000185907,ENSP00000363118|ENSP00000392766,ENSP00000388206"
PH_hs_0060025	0.322553	0.145066	0.42209	1.00354	NANOG	129.585	Nanog homeobox	1	79923	NM_024865.2	153945815	NP_079141.2	ENSG00000176654|ENSG00000111704	"ENST00000530989|ENST00000229307,ENST00000526286"	"ENSP00000432545|ENSP00000229307,ENSP00000435288"
PH_hs_0006308	0.468096	0.429728	0.112536	1.02229	CRLF1	1431.07	cytokine receptor-like factor 1	1	9244	NM_004750.4	260655997	NP_004741.1	ENSG00000006016	ENST00000392386	ENSP00000376188
PH_hs_0013181	0.614604	0.149838	0.269763	1.02114	KRT38	5006.57	keratin 38	1	8687	NM_006771.3	15431317	NP_006762.3	ENSG00000171360	ENST00000246646	ENSP00000246646
PH_hs_0007533	0.493216	0.278344	0.231979	1.02111	DAPK2	3219.61	death-associated protein kinase 2	1	23604	NM_014326.3	71774012	NP_055141.2	ENSG00000035664	"ENST00000261891,ENST00000559007"	"ENSP00000261891,ENSP00000453639"
PH_hs_0060100	0.789304	0.112541	0.583257	1.51246	GOLGA3	64.011	golgin A3	1	2802	NM_001172557.1	289191385	NP_001166028.1	ENSG00000090615	"ENST00000545875,ENST00000537452"	"ENSP00000442603,ENSP00000442143"
PH_hs_0024300	-0.575146	-0.241124	-0.171207	-1.02102	HOOK1	213.676	hook homolog 1 (Drosophila)	1	51361	NM_015888.4	95007031	NP_056972.1	ENSG00000134709	ENST00000395561	ENSP00000378928
PH_hs_0060385	0.481097	0.158988	0.303068	1.03457	NA	491.89	NA	5	NA	NA	NA	NA	NA	NA	NA
PH_hs_0061429	0.658488	0.213769	0.144454	1.01917	CHST5	1411.87	carbohydrate (N-acetylglucosamine 6-O) sulfotransferase 5	1	23563	NM_024533.4	345091043	NP_078809.2	ENSG00000183196|ENSG00000135702|ENSG00000260092	ENST00000390664|ENST00000336257|ENST00000460606	ENSP00000375079|ENSP00000338783|ENSP00000457544
PH_hs_0061080	0.555547	0.1812	0.293875	1.01917	S100A3	1901.7	S100 calcium binding protein A3	1	6274	NM_002960.1	4506762	NP_002951.1	ENSG00000188015	"ENST00000368712,ENST00000368713"	"ENSP00000357701,ENSP00000357702"
PH_hs_0035551	-0.338299	-0.191508	-0.413542	-1.01745	TMEM249	145.973	transmembrane protein 249	1	340393	"NM_001252402.1,NM_001252404.1,NR_047684.1"	357394955;357394960;386268033	"NP_001239331.1,NP_001239333.1,-"	ENSG00000214597|ENSG00000261587	"ENST00000526263,ENST00000531225,ENST00000398633|ENST00000562477,ENST00000562628,ENST00000565365"	"ENSP00000435362,ENSP00000436572,ENSP00000381630|ENSP00000457580,ENSP00000454248,ENSP00000454468"
PH_hs_0060526	-0.653276	-0.196613	-0.177148	-1.01596	SYNJ2BP	397.013	synaptojanin 2 binding protein	1	55333	NM_018373.2	157388992	NP_060843.2	ENSG00000213463	ENST00000256366	ENSP00000256366
PH_hs_0031788	-0.407006	-0.0900074	-0.456759	-1.01586	FAM102B	194.099	"family with sequence similarity 102, member B"	1	284611	NM_001010883.2	162809335	NP_001010883.2	NA	NA	NA
PH_hs_0060638	0.677733	0.116761	0.272502	1.05984	NA	3631.85	NA	5	NA	NA	NA	NA	NA	NA	NA
PH_hs_0023746	-0.672331	-0.295901	-0.0188083	-1.01503	HEATR3	223.511	HEAT repeat containing 3	1	55027	NM_182922.2	90819240	NP_891552.1	ENSG00000155393	ENST00000285767	ENSP00000285767
PH_hs_0033336	-0.377562	-0.22033	-0.342874	-1.01494	ZNF33B|ZNF33A	163.031	zinc finger protein 33B|zinc finger protein 33A	4	7582|7581	"NM_006955.1|NM_006974.2,NM_006954.1"	24307874|110347444;110347445	"NP_008886.1|NP_008905.1,NP_008885.1"	ENSG00000196693|ENSG00000189180	"ENST00000359467|ENST00000374618,ENST00000458705"	"ENSP00000352444|ENSP00000363747,ENSP00000387713"
PH_hs_0060960	0.342355	0.462517	0.206816	1.01034	ERBB4	753.93	v-erb-a erythroblastic leukemia viral oncogene homolog 4 (avian)	1	2066	"NM_001042599.1,NM_005235.2"	110825957;110825959	"NP_001036064.1,NP_005226.1"	ENSG00000178568	ENST00000402597	ENSP00000385565
PH_hs_0060961	0.61619	0.0627784	0.404286	1.16674	MAF	599.209	v-maf musculoaponeurotic fibrosarcoma oncogene homolog (avian)	1	4094	NM_001031804.2	197313769	NP_001026974.1	ENSG00000178573	ENST00000393350	ENSP00000377019
PH_hs_0060973	0.738317	0.133094	0.266558	1.13368	NA	2219.32	NA	4	NA	NA	NA	NA	ENSG00000160886|ENSG00000262378	ENST00000292430|ENST00000572300	ENSP00000292430|ENSP00000458502
PH_hs_0036686	0.563143	0.158112	0.290199	1.01476	VCY1B|VCY	1498.17	"variable charge, Y-linked 1B|variable charge, Y-linked"	4	353513|9084	NM_181880.1|NM_004679.2	49355827|49355825	NP_870996.1|NP_004670.1	ENSG00000129862|ENSG00000129864	ENST00000250823|ENST00000250825	ENSP00000250823|ENSP00000250825
PH_hs_0061013	0.216303	0.148957	0.553803	1.06886	NA	171.49	NA	5	NA	NA	NA	NA	NA	NA	NA
PH_hs_0045072	-0.230014	-0.263125	-0.37878	-1.0129	DNMT3A	95.8416	DNA (cytosine-5-)-methyltransferase 3 alpha	1	1788	NM_175630.1	28559070	NP_783329.1	ENSG00000119772	ENST00000406659	ENSP00000384852
PH_hs_0001780	-0.524442	-0.0792977	-0.396586	-1.01191	MRE11A	375.164	MRE11 meiotic recombination 11 homolog A (S. cerevisiae)	1	4361	"NM_005590.3,NM_005591.3"	56550106;56550105	"NP_005581.2,NP_005582.1"	NA	NA	NA
PH_hs_0061057	0.512668	0.124075	0.396827	1.02547	NA	3648.01	NA	1	NA	NA	NA	NA	ENSG00000106031	ENST00000222753	ENSP00000222753
PH_hs_0027688	-0.388551	-0.160041	-0.397304	-1.01086	WASF1	222.662	"WAS protein family, member 1"	1	8936	"NM_001024936.1,NM_001024935.1,NM_001024934.1,NM_003931.2"	68161503;68161501;68161499;68161486	"NP_001020107.1,NP_001020106.1,NP_001020105.1,NP_003922.1"	ENSG00000112290	"ENST00000368938,ENST00000265601,ENST00000444391"	"ENSP00000357934,ENSP00000265601,ENSP00000407041"
PH_hs_0010594	0.662784	0.101544	0.200523	1.01044	BRDT	444.123	"bromodomain, testis-specific"	1	676	"NM_001242810.1,NM_001242808.1,NM_001242807.1,NM_001242806.1,NM_001242805.1,NM_207189.2,NM_001726.3"	338797767;338797760;338797762;338797756;338797754;168229154;168229153	"NP_001229739.1,NP_001229737.1,NP_001229736.1,NP_001229735.1,NP_001229734.1,NP_997072.1,NP_001717.2"	ENSG00000137948	"ENST00000394530,ENST00000399546,ENST00000402388,ENST00000370389,ENST00000362005"	"ENSP00000378038,ENSP00000387822,ENSP00000384051,ENSP00000359416,ENSP00000354568"
PH_hs_0022144	0.686261	0.207252	0.107764	1.00998	NME9	2364.15	NME/NM23 family member 9	1	347736	NM_178130.2	31342394	NP_835231.1	ENSG00000181322	"ENST00000317876,ENST00000492993,ENST00000383180"	"ENSP00000321929,ENSP00000419355,ENSP00000372667"
PH_hs_0045632	0.726519	0.0756404	0.206892	1.00961	MYO7A	2526.2	myosin VIIA	1	4647	NM_001127179.2	256355178	NP_001120651.2	ENSG00000261910|ENSG00000137474	ENST00000576665|ENST00000409893	ENSP00000459383|ENSP00000386689
PH_hs_0061391	0.227265	0.0753755	0.676946	1.05349	CCBE1	534.155	collagen and calcium binding EGF domains 1	1	147372	NM_133459.3	290562712	NP_597716.1	ENSG00000183287	ENST00000398179	ENSP00000381241
PH_hs_0061204	0.686139	0.0996488	0.227444	1.0075	GRIA1	3747.74	"glutamate receptor, ionotropic, AMPA 1"	1	2890	"NM_001258023.1,NM_001258022.1,NM_001258021.1,NM_001258020.1,NM_001258019.1,NM_001114183.1,NM_000827.3,NR_047578.1"	384381491;384381489;384381487;384381485;384381483;167001483;167001418;384381493	"NP_001244952.1,NP_001244951.1,NP_001244950.1,NP_001244949.1,NP_001244948.1,NP_001107655.1,NP_000818.2,-"	ENSG00000155511	"ENST00000518783,ENST00000285900"	"ENSP00000428994,ENSP00000285900"
PH_hs_0029833	-0.446426	-0.310313	-0.175747	-1.0071	SOCS4	170.796	suppressor of cytokine signaling 4	1	122809	"NM_199421.1,NM_080867.2"	40807479;40807478	"NP_955453.1,NP_543143.1"	NA	NA	NA
PH_hs_0042620	0.39395	0.241053	0.350054	1.00702	OR4D11	1304.14	"olfactory receptor, family 4, subfamily D, member 11"	1	219986	NM_001004706.1	52317240	NP_001004706.1	ENSG00000176200	ENST00000313253	ENSP00000320077
PH_hs_0061654	0.751017	0.171852	0.154059	1.07176	NA	2333.76	NA	1	NA	NA	NA	NA	ENSG00000163623	ENST00000295886	ENSP00000295886
PH_hs_0027873	-0.61576	-0.0650018	-0.294441	-1.00609	PRKX	194.099	"protein kinase, X-linked"	1	5613	NM_005044.4	290648026	NP_005035.1	NA	NA	NA
PH_hs_0040664	-0.391972	-0.109119	-0.456317	-1.00521	GNPTAB	282.717	"N-acetylglucosamine-1-phosphate transferase, alpha and beta subunits"	1	79158	NM_024312.4	296010928	NP_077288.2	ENSG00000111670	"ENST00000550718,ENST00000549738"	"ENSP00000449557,ENSP00000450161"
PH_hs_0005436	0.466446	0.298461	0.234361	1.00507	ILDR1	1584.18	immunoglobulin-like domain containing receptor 1	1	286676	"NM_001199799.1,NM_001199800.1,NM_175924.3"	315259077;315259079;315259076	"NP_001186728.1,NP_001186729.1,NP_787120.1"	ENSG00000145103	ENST00000273691	ENSP00000273691
PH_hs_0032091	0.579633	0.257075	0.164779	1.00448	UTS2R	1278.19	urotensin 2 receptor	1	2837	NM_018949.1	9506744	NP_061822.1	ENSG00000181408	ENST00000313135	ENSP00000323516
PH_hs_0040978	-0.40455	-0.174851	-0.357698	-1.00433	SPG20	244.453	spastic paraplegia 20 (Troyer syndrome)	1	23111	"NM_015087.4,NM_001142296.1,NM_001142295.1,NM_001142294.1"	214830219;214830186;214830108;214830078	"NP_055902.1,NP_001135768.1,NP_001135767.1,NP_001135766.1"	NA	NA	NA
PH_hs_0038690	0.902451	0.00141929	0.109064	1.00345	RPL35	80724.2	ribosomal protein L35	1	11224	NM_007209.3	78190471	NP_009140.1	ENSG00000136942	"ENST00000348462,ENST00000493018,ENST00000373570"	"ENSP00000259469,ENSP00000437215,ENSP00000362671"
PH_hs_0002618	-0.24687	-0.253324	-0.447491	-1.00316	LONRF2	137.887	LON peptidase N-terminal domain and ring finger 2	1	164832	NM_198461.3	148528974	NP_940863.3	ENSG00000170500	ENST00000409647	ENSP00000386823
PH_hs_0025063	-0.294837	-0.33154	-0.218711	-1.00173	RERG	86.8044	"RAS-like, estrogen-regulated, growth inhibitor"	1	85004	"NM_001190726.1,NM_032918.2"	299758438;299758437	"NP_001177655.1,NP_116307.1"	ENSG00000134533	"ENST00000536465,ENST00000538313,ENST00000256953"	"ENSP00000438280,ENSP00000441505,ENSP00000256953"
PH_hs_0062427	0.652567	0.00377693	0.493025	1.13346	NA	8413.2	NA	5	NA	NA	NA	NA	NA	NA	NA
PH_hs_0062430	0.555862	0.075973	0.426229	1.09341	LOC731932	852.443	uncharacterized LOC731932	1	731932	"XM_003960526.1,XM_001716667.2,XM_001720173.2"	410172818;239744820;239756000	"XP_003960575.1,XP_001716719.1,XP_001720225.1"	NA	NA	NA
PH_hs_0036396	0.623402	0.0216698	0.324124	1.00123	LCE2A	769.615	late cornified envelope 2A	1	353139	NM_178428.3	57242769	NP_848515.1	ENSG00000187173	ENST00000368779	ENSP00000357768
PH_hs_0062537	0.646046	0.128865	0.417771	1.20406	NA	1279.69	NA	4	NA	NA	NA	NA	ENSG00000233434|ENSG00000232866	ENST00000543078|ENST00000377437	ENSP00000470520|ENSP00000472927
PH_hs_0062538	0.34587	0.0795179	0.604238	1.03831	NA	945.931	NA	4	NA	NA	NA	NA	ENSG00000232866|ENSG00000233434	ENST00000377437|ENST00000543078	ENSP00000472927|ENSP00000470520

## Sheet: 316 probs (remove 73 probes)
	log2 (Ratio)				Annotation
ID	M10/C	M50/M10	M100/M50	M100/C	Gene_symbol		Description	Group	Entrez_gene	RefSeq	RNA_nucleotide_gi	Protein_accession.version	Ensembl_gene	Ensembl_transcript	Ensembl_protein
PH_hs_0030485	-0.17683	-0.0670939	-6.60199	-6.64386	TMEM185A	15.0531	transmembrane protein 185A	1	84548	"NM_001174092.1,NM_032508.2"	291575180;291575179	"NP_001167563.1,NP_115897.1"	ENSG00000268010|ENSG00000269556|ENSG00000155984	"ENST00000597324|ENST00000600449|ENST00000536359,ENST00000316916,ENST00000513505"	"ENSP00000471856|ENSP00000471932|ENSP00000443119,ENSP00000359449,ENSP00000429207"
PH_hs_0040950	-0.989674	-0.00740531	-1.14176	-2.34941	ZDBF2	38.1785	"zinc finger, DBF-type containing 2"	1	57683	NM_020923.1	151301097	NP_065974.1	NA	NA	NA
PH_hs_0016563	0.749799	0.266604	1.06696	2.28555	EXOC3L2	626.879	exocyst complex component 3-like 2	1	90332	NM_138568.3	226371707	NP_612635.3	ENSG00000130201	"ENST00000413988,ENST00000252482"	"ENSP00000400713,ENSP00000252482"
PH_hs_0045754	0.90885	0.0953178	0.763369	1.93389	IGF1	492.988	insulin-like growth factor 1 (somatomedin C)	1	3479	NM_001111285.1	163659902	NP_001104755.1	ENSG00000017427	ENST00000307046	ENSP00000302665
PH_hs_0000236	0.443625	0.182149	0.285529	1.031	INHBB	138.712	"inhibin, beta B"	1	3625	NM_002193.2	154813203	NP_002184.2	ENSG00000163083	ENST00000295228	ENSP00000295228
PH_hs_0004461	0.646366	0.0808785	0.880886	1.81902	FCGR1B|FCGR1A	243.012	"Fc fragment of IgG, high affinity Ib, receptor (CD64)|Fc fragment of IgG, high affinity Ia, receptor (CD64)"	4	2210|2209	"NM_001004340.3,NM_001017986.3,NR_045213.1|NM_000566.3"	349732138;349732137;349732146|167621452	"NP_001004340.2,NP_001017986.1,-|NP_000557.1"	ENSG00000266332|ENSG00000150337	ENST00000580698|ENST00000369168	ENSP00000462402|ENSP00000358165
PH_hs_0039714	0.639059	0.0688241	0.818366	1.71879	FAM92A1P2|FAM92A1	210.514	"family with sequence similarity 92, member A3|family with sequence similarity 92, member A1"	4	403315|137392	NR_003612.1|NM_145269.3	153791949|150170657	-|NP_660312.2	ENSG00000188343	"ENST00000521641,ENST00000517718,ENST00000518116,ENST00000423990,ENST00000359421"	"ENSP00000428751,ENSP00000428874,ENSP00000428065,ENSP00000401774,ENSP00000352391"
PH_hs_0000607	-0.824938	-0.0664587	-0.253186	-1.12579	EOGT	45.7239	EGF domain-specific O-linked N-acetylglucosamine (GlcNAc) transferase	1	285203	NM_173654.1	39930530	NP_775925.1	ENSG00000163378	"ENST00000295571,ENST00000383701"	"ENSP00000295571,ENSP00000373206"
PH_hs_0021977	-0.845463	-0.379647	-0.344865	-1.66925	PIK3R1	133.955	"phosphoinositide-3-kinase, regulatory subunit 1 (alpha)"	1	5295	"NM_181524.1,NM_001242466.1,NM_181504.3,NM_181523.2"	32455249;335057533;335057532;335057530	"NP_852665.1,NP_001229395.1,NP_852556.2,NP_852664.1"	ENSG00000145675	"ENST00000274335,ENST00000396611,ENST00000521381"	"ENSP00000274335,ENSP00000379855,ENSP00000428056"
PH_hs_0011427	1.34359	0.0444606	0.26359	1.65663	BANK1	859.096	B-cell scaffold protein with ankyrin repeats 1	1	55024	"NM_001083907.2,NM_001127507.2,NM_017935.4"	260763965;260763962;260763959	"NP_001077376.2,NP_001120979.2,NP_060405.4"	ENSG00000153064	"ENST00000428908,ENST00000444316,ENST00000322953,ENST00000504592"	"ENSP00000412748,ENSP00000388817,ENSP00000320509,ENSP00000421443"
PH_hs_0001363	-0.212218	-0.165783	-0.554308	-1.05509	NOP10	96.8202	NOP10 ribonucleoprotein	1	55505	NM_018648.3	77812675	NP_061118.1	ENSG00000182117	"ENST00000557912,ENST00000328848"	"ENSP00000453475,ENSP00000332198"
PH_hs_0044966	0.132724	0.385249	1.02167	1.64349	FAM86B3P	2520.72	"family with sequence similarity 86, member A pseudogene"	1	286042	NR_024361.1	211938422	-	NA	NA	NA
PH_hs_0001509	-0.781532	-0.039849	-0.0974406	-1.07378	PBLD	69.4653	phenazine biosynthesis-like protein domain containing	1	64081	NM_022129.3	74316007	NP_071412.2	ENSG00000108187	"ENST00000358769,ENST00000336578"	"ENSP00000351619,ENSP00000338041"
PH_hs_0060053	-0.724706	-0.375754	-0.408567	-1.64018	ZNF121	100.663	zinc finger protein 121	1	7675	NM_001008727.2	221136819	NP_001008727.1	ENSG00000197961	"ENST00000320451,ENST00000591447,ENST00000588400,ENST00000586602"	"ENSP00000326967,ENSP00000467838,ENSP00000467491,ENSP00000468643"
PH_hs_0062345	1.07919	0.0169879	0.419312	1.58852	BTNL10	121.64	butyrophilin-like 10	1	100129094	"XM_003960279.1,XM_001722031.3,XM_001722254.3"	410171583;397138936;397137973	"XP_003960328.1,XP_001722083.1,XP_001722306.1"	NA	NA	NA
PH_hs_0042256	1.00572	0.255092	0.137672	1.57975	OR10A4	585.144	"olfactory receptor, family 10, subfamily A, member 4"	1	283297	NM_207186.2	284172517	NP_997069.2	ENSG00000170782	ENST00000379829	ENSP00000369157
PH_hs_0012958	0.732726	0.00533381	0.725729	1.56455	TNF	128.788	tumor necrosis factor	1	7124	NM_000594.3	395132451	NP_000585.2	ENSG00000204490|ENSG00000206439|ENSG00000223952|ENSG00000230108|ENSG00000228321|ENSG00000232810|ENSG00000228849|ENSG00000228978	ENST00000376122|ENST00000383496|ENST00000448781|ENST00000443707|ENST00000412275|ENST00000449264|ENST00000420425|ENST00000445232	ENSP00000365290|ENSP00000372988|ENSP00000389490|ENSP00000389492|ENSP00000392858|ENSP00000398698|ENSP00000410668|ENSP00000389265
PH_hs_0043004	0.687162	0.112322	0.609566	1.55674	CLDN25	842.878	claudin 25	1	644672	NM_001101389.1	157820126	NP_001094859.1	ENSG00000228607	ENST00000453129	ENSP00000396304
PH_hs_0040936	-0.146959	-0.316052	-0.905259	-1.52478	FOXN3	168.301	forkhead box N3	1	1112	"NM_005197.3,NM_001085471.1"	146231981;146231999	"NP_005188.2,NP_001078940.1"	NA	NA	NA
PH_hs_0013220	-0.695884	-0.303735	-0.410263	-1.51352	PIK3C2A	124.88	"phosphatidylinositol-4-phosphate 3-kinase, catalytic subunit type 2 alpha"	1	5286	NM_002645.2	157671928	NP_002636.2	ENSG00000011405	ENST00000540361	ENSP00000438687
PH_hs_0019624	-0.96423	-0.141943	-0.292018	-1.50541	CHM	98.7092	choroideremia (Rab escort protein 1)	1	1121	NM_000390.2	82617643	NP_000381.1	ENSG00000188419	ENST00000537751	ENSP00000441728
PH_hs_0027569	-0.444414	-0.0849943	-0.820757	-1.47886	PDCL	61.2389	phosducin-like	1	5082	NM_005388.4	299782540	NP_005379.3	NA	NA	NA
PH_hs_0038856	-0.67397	-0.022504	-0.635193	-1.4641	CNOT6L	42.2644	"CCR4-NOT transcription complex, subunit 6-like"	1	246175	NM_144571.2	115583678	NP_653172.2	NA	NA	NA
PH_hs_0000376	-0.500902	-0.289029	-0.510369	-1.45966	SP4	85.7263	Sp4 transcription factor	1	6671	NM_003112.3	67010024	NP_003103.2	ENSG00000105866	ENST00000432066	ENSP00000393623
PH_hs_0045571	0.371823	0.145983	0.777871	1.44436	CR1	178.201	complement component (3b/4b) receptor 1 (Knops blood group)	1	1378	"NM_000651.4,NM_000573.3"	86793108;86793035	"NP_000642.3,NP_000564.2"	NA	NA	NA
PH_hs_0008743	1.00379	0.00547607	0.418739	1.44414	RSPH6A	824.551	radial spoke head 6 homolog A (Chlamydomonas)	1	81492	NM_030785.3	269315843	NP_110412.1	ENSG00000104941	"ENST00000597055,ENST00000600188,ENST00000221538"	"ENSP00000472630,ENSP00000471559,ENSP00000221538"
PH_hs_0034684	-0.275498	-0.503345	-0.509312	-1.43524	HIST1H2BG	135.909	"histone cluster 1, H2bg"	1	8339	NM_003518.3	21536482	NP_003509.1	ENSG00000187990	ENST00000244601	ENSP00000244601
PH_hs_0045407	0.396576	0.324162	0.585904	1.42555	PCDHAC1	483.528	"protocadherin alpha subfamily C, 1"	1	56135	NM_031882.2	14717402	NP_114088.2	ENSG00000248383	ENST00000409700	ENSP00000386356
PH_hs_0014405	1.11054	0.274827	0.033538	1.41513	CSAD	936.456	cysteine sulfinic acid decarboxylase	1	51380	"NM_015989.4,NM_001244705.1,NM_001244706.1"	194294550;347659020;347659022	"NP_057073.4,NP_001231634.1,NP_001231635.1"	ENSG00000139631	"ENST00000379843,ENST00000444623,ENST00000379846,ENST00000379850,ENST00000267085"	"ENSP00000369172,ENSP00000415485,ENSP00000369175,ENSP00000369179,ENSP00000267085"
PH_hs_0035957	-0.456093	-0.264463	-0.61749	-1.40938	ERCC6L2	273.782	"excision repair cross-complementing rodent repair deficiency, complementation group 6-like 2"	1	375748	NM_001010895.2	157364962	NP_001010895.1	ENSG00000182150	"ENST00000402838,ENST00000456993"	"ENSP00000384215,ENSP00000409751"
PH_hs_0041104	-0.507127	-0.0648654	-0.727199	-1.40667	GTF2I	117.386	general transcription factor IIi	1	2969	"NM_001163636.1,NM_033001.2,NM_033000.2,NM_032999.2,NM_001518.3"	254692933;169881255;169881254;169881253;169881251	"NP_001157108.1,NP_127494.1,NP_127493.1,NP_127492.1,NP_001509.3"	ENSG00000077809	ENST00000443166	ENSP00000404240
PH_hs_0042832	0.424011	0.367718	0.493286	1.3983	OR11G2	1064.55	"olfactory receptor, family 11, subfamily G, member 2"	1	390439	NM_001005503.1	53828743	NP_001005503.1	ENSG00000196832	ENST00000357366	ENSP00000349930
PH_hs_0004608	-0.838236	-0.0120489	-0.30853	-1.19127	MREG	102.179	melanoregulin	1	55686	NM_018000.2	124487398	NP_060470.2	ENSG00000118242	"ENST00000420348,ENST00000424992,ENST00000439791,ENST00000263268"	"ENSP00000404470,ENSP00000413302,ENSP00000411076,ENSP00000263268"
PH_hs_0027858	-1.0045	-0.0540333	-0.303188	-1.39518	DBT	122.54	dihydrolipoamide branched chain transacylase E2	1	1629	NM_001918.3	392494078	NP_001909.3	NA	NA	NA
PH_hs_0006032	-0.632199	-0.172011	-0.481386	-1.38457	MPP5	125.831	"membrane protein, palmitoylated 5 (MAGUK p55 subfamily member 5)"	1	64398	"NM_022474.3,NM_001256550.1"	375065849;375065851	"NP_071919.2,NP_001243479.1"	NA	NA	NA
PH_hs_0022745	-0.646292	-0.539855	-0.100408	-1.38074	ZNF800	193.627	zinc finger protein 800	1	168850	NM_176814.3	39753952	NP_789784.2	ENSG00000048405	ENST00000434602	ENSP00000403945
PH_hs_0028151	-0.449886	-0.187834	-0.617491	-1.37951	ZNF326	102.925	zinc finger protein 326	1	284695	NM_182976.2	156523255	NP_892021.1	NA	NA	NA
PH_hs_0002946	-0.542205	-0.404251	-0.340895	-1.37922	NR1D2	149.368	"nuclear receptor subfamily 1, group D, member 2"	1	9975	"NM_001145425.1,NM_005126.4"	224177492;224177490	"NP_001138897.1,NP_005117.3"	ENSG00000174738	ENST00000396676	ENSP00000379909
PH_hs_0014080	0.699014	0.178596	0.39342	1.36204	FBXO40	508.76	F-box protein 40	1	51725	NM_016298.3	156546887	NP_057382.2	NA	NA	NA
PH_hs_0044245	0.553369	0.16925	0.452215	1.36143	FAM153A|FAM153B	240.234	"family with sequence similarity 153, member A|family with sequence similarity 153, member B"	4	285596|202134	NM_173663.3|NM_001265615.1	123701921|388453844	NP_775934.3|NP_001252544.1	ENSG00000170074|ENSG00000182230	ENST00000440605|ENST00000515817	ENSP00000411506|ENSP00000427684
PH_hs_0006042	-0.403186	-0.117386	-0.612401	-1.21197	KCTD12	128.145	potassium channel tetramerisation domain containing 12	1	115207	NM_138444.3	146149187	NP_612453.1	NA	NA	NA
PH_hs_0025041	-0.408004	-0.204096	-0.634124	-1.35976	ARFIP1	170.847	ADP-ribosylation factor interacting protein 1	1	27236	"NM_001025595.1,NM_001025593.1,NM_014447.2"	71040093;71040091;71040088	"NP_001020766.1,NP_001020764.1,NP_055262.1"	ENSG00000164144	"ENST00000356064,ENST00000405727"	"ENSP00000348360,ENSP00000384189"
PH_hs_0007905	-0.240703	-0.197589	-0.789229	-1.34961	RABL3	156.051	"RAB, member of RAS oncogene family-like 3"	1	285282	NM_173825.3	115529441	NP_776186.2	ENSG00000144840	"ENST00000485161,ENST00000473654"	"ENSP00000417266,ENSP00000419310"
PH_hs_0045405	0.787613	0.37891	0.080706	1.33617	GIGYF2	698.697	GRB10 interacting GYF protein 2	1	26058	"NM_001103148.1,NM_001103147.1,NM_001103146.1,NM_015575.3"	156766046;156766044;156766042;156766041	"NP_001096618.1,NP_001096617.1,NP_001096616.1,NP_056390.2"	ENSG00000204120	ENST00000373566	ENSP00000362667
PH_hs_0026375	-0.548266	-0.0861178	-0.602456	-1.32975	TRIM52	119.107	tripartite motif containing 52	1	84851	NM_032765.2	34147443	NP_116154.1	ENSG00000183718	ENST00000327767	ENSP00000332152
PH_hs_0038782	-0.14746	-0.223242	-0.780492	-1.32531	HEATR1	77.743	HEAT repeat containing 1	1	55127	NM_018072.5	301069317	NP_060542.4	ENSG00000119285	ENST00000366579	ENSP00000355538
PH_hs_0030984	-0.413422	-0.0450369	-0.734622	-1.32015	LOC101060541	148.084	RNA-binding protein 8A-like	1	101060541	XM_003960178.1	410171312	XP_003960227.1	ENSG00000265241|ENSG00000131795	ENST00000583313|ENST00000330165	ENSP00000463058|ENSP00000333001
PH_hs_0041076	-0.466555	-0.16956	-0.55413	-1.31785	STX17	102.617	syntaxin 17	1	55014	NM_017919.2	157388936	NP_060389.2	ENSG00000136874	"ENST00000524405,ENST00000525342,ENST00000531035,ENST00000529340"	"ENSP00000436666,ENSP00000433701,ENSP00000433694,ENSP00000434323"
PH_hs_0002452	0.999502	0.0213	0.181973	1.31341	LPAR4	169.28	lysophosphatidic acid receptor 4	1	2846	NM_005296.2	223029437	NP_005287.1	ENSG00000147145	"ENST00000435339,ENST00000373301"	"ENSP00000408205,ENSP00000362398"
PH_hs_0044358	-0.317544	-0.0259911	-0.822831	-1.31011	FAM71F2	89.5315	"family with sequence similarity 71, member F2"	1	346653	NM_001012454.3	149192823	NP_001012457.3	ENSG00000205085	"ENST00000434001,ENST00000480462"	"ENSP00000401654,ENSP00000420140"
PH_hs_0009318	-0.493308	-0.496754	-0.19065	-1.29886	PDPK1	112.732	3-phosphoinositide dependent protein kinase-1	1	5170	"NM_031268.5,NM_002613.4"	387849237;387849236	"NP_112558.2,NP_002604.1"	ENSG00000140992	"ENST00000354836,ENST00000389224"	"ENSP00000346895,ENSP00000373876"
PH_hs_0027848	-0.645254	-0.226763	-0.336085	-1.29526	POLK	124.353	polymerase (DNA directed) kappa	1	51426	NM_016218.2	208431818	NP_057302.1	ENSG00000122008	"ENST00000380481,ENST00000509126,ENST00000508526,ENST00000505975,ENST00000510815,ENST00000503479"	"ENSP00000369848,ENSP00000423532,ENSP00000426853,ENSP00000424859,ENSP00000422094,ENSP00000421997"
PH_hs_0024731	0.586528	0.116492	0.534465	1.29408	PKD1L1	697.946	polycystic kidney disease 1 like 1	1	168507	NM_138295.3	315434237	NP_612152.1	ENSG00000158683	ENST00000289672	ENSP00000289672
PH_hs_0014694	0.335827	0.560503	0.351354	1.29181	VWA7	1234.12	von Willebrand factor A domain containing 7	1	80737	NM_025258.2	153945851	NP_079534.2	ENSG00000223757|ENSG00000234433|ENSG00000204396|ENSG00000230048|ENSG00000227144|ENSG00000238203	"ENST00000547402,ENST00000438725|ENST00000550381,ENST00000430726|ENST00000375686,ENST00000375688|ENST00000546928,ENST00000438415|ENST00000550450,ENST00000452630|ENST00000551851,ENST00000452329"	"ENSP00000449880,ENSP00000413704|ENSP00000449988,ENSP00000411910|ENSP00000364838,ENSP00000364840|ENSP00000449478,ENSP00000390732|ENSP00000450313,ENSP00000411804|ENSP00000449358,ENSP00000406943"
PH_hs_0004827	-0.923571	-0.0183688	-0.279107	-1.28944	SUV39H2	106.525	suppressor of variegation 3-9 homolog 2 (Drosophila)	1	79723	"NM_001193425.1,NM_001193427.1,NM_001193426.1,NM_001193424.1,NM_024670.3,NR_034181.1"	301171596;301171612;301171604;301171587;34147611;301171620	"NP_001180354.1,NP_001180356.1,NP_001180355.1,NP_001180353.1,NP_078946.1,-"	ENSG00000152455	"ENST00000358298,ENST00000313519,ENST00000378331"	"ENSP00000351046,ENSP00000319208,ENSP00000367582"
PH_hs_0000023	-0.724612	-0.342834	-0.202454	-1.28658	MAP2	1458.27	microtubule-associated protein 2	1	4133	"NM_001039538.1,NM_002374.3,NM_031845.2,NM_031847.2"	87578393;87578395;87578391;87578254	"NP_001034627.1,NP_002365.3,NP_114033.2,NP_114035.2"	NA	NA	NA
PH_hs_0011058	-0.426345	-0.316783	-0.19065	-1.01699	KIAA1377	150.268	KIAA1377	1	57562	NM_020802.2	115387117	NP_065853.2	ENSG00000110318	"ENST00000537689,ENST00000532077,ENST00000532529"	"ENSP00000443184,ENSP00000437014,ENSP00000433643"
PH_hs_0032319	-0.305252	-0.428459	-0.450297	-1.28371	ZNF528	150.175	zinc finger protein 528	1	84436	NM_032423.2	46410932	NP_115799.2	ENSG00000167555	"ENST00000360465,ENST00000391788"	"ENSP00000353652,ENSP00000375665"
PH_hs_0001809	-0.358544	-0.327777	-0.48974	-1.28206	SCRN3	190.41	secernin 3	1	79634	"NM_001193528.1,NM_024583.4"	302058286;302058285	"NP_001180457.1,NP_078859.2"	ENSG00000144306	ENST00000272732	ENSP00000272732
PH_hs_0012412	0.923589	0.145912	0.120909	1.12567	CLEC4G	735.913	"C-type lectin domain family 4, member G"	1	339390	"NM_198492.3,NM_001244856.1"	221136795;349732268	"NP_940894.1,NP_001231785.1"	ENSG00000182566	ENST00000328853	ENSP00000327599
PH_hs_0028398	-0.693056	-0.0775145	-0.399801	-1.27532	KIAA0825	95.2393	KIAA0825	1	285600	"NM_173665.2,NM_001145678.1"	197100792;224589076	"NP_775936.1,NP_001139150.1"	NA	NA	NA
PH_hs_0011156	-0.417352	-0.120478	-0.647693	-1.27071	TCEANC2	224.243	transcription elongation factor A (SII) N-terminal and central domain containing 2	1	127428	NM_153035.1	23308504	NP_694580.1	ENSG00000116205	ENST00000234827	ENSP00000234827
PH_hs_0025994	-0.436351	-0.119482	-0.587804	-1.26416	KIF1B	75.7	kinesin family member 1B	1	23095	NM_015074.3	189339259	NP_055889.2	ENSG00000054523	ENST00000263934	ENSP00000263934
PH_hs_0032201	-0.749384	-0.0642136	-0.415215	-1.26313	FAM200A	309.737	"family with sequence similarity 200, member A"	1	221786	NM_145111.3	301601651	NP_659802.1	ENSG00000221909	"ENST00000408938,ENST00000449309"	"ENSP00000386191,ENSP00000411372"
PH_hs_0032148	-0.805707	-0.18905	-0.163516	-1.26043	PEG3	106.833	paternally expressed 3	1	5178	"NM_001146187.1,NM_001146186.1,NM_001146185.1,NM_001146184.1,NM_006210.2"	226053184;226053168;226053147;226053125;226053068	"NP_001139659.1,NP_001139658.1,NP_001139657.1,NP_001139656.1,NP_006201.1"	ENSG00000198300	ENST00000598410	ENSP00000473190
PH_hs_0032859	-0.558751	-0.109723	-0.480967	-1.25599	SMAD1	99.6468	SMAD family member 1	1	4086	"NM_001003688.1,NM_005900.2"	51173726;51173725	"NP_001003688.1,NP_005891.1"	NA	NA	NA
PH_hs_0013497	0.86775	0.206772	0.120646	1.17155	PRSS36	1703.35	"protease, serine, 36"	1	146547	"NM_173502.4,NM_001258291.1,NM_001258290.1"	385137131;385137134;385137132	"NP_775773.2,NP_001245220.1,NP_001245219.1"	ENSG00000178226	"ENST00000569305,ENST00000418068,ENST00000268281"	"ENSP00000454768,ENSP00000407160,ENSP00000268281"
PH_hs_0013981	0.635873	0.0720921	0.402429	1.20793	ADAMTS8	106.665	"ADAM metallopeptidase with thrombospondin type 1 motif, 8"	1	11095	NM_007037.4	153792350	NP_008968.4	ENSG00000134917	ENST00000257359	ENSP00000257359
PH_hs_0035519	-0.679192	-0.154377	-0.35378	-1.2559	SGOL1	218.203	shugoshin-like 1 (S. pombe)	1	151648	"NM_138484.3,NM_001199256.1,NM_001012412.3,NM_001199257.1,NM_001199254.1"	312922398;312922340;312922396;312922344;312922338	"NP_612493.1,NP_001186185.1,NP_001012412.1,NP_001186186.1,NP_001186183.1"	ENSG00000129810	"ENST00000429446,ENST00000383774,ENST00000417364,ENST00000437051,ENST00000452020,ENST00000443724,ENST00000425061,ENST00000419233,ENST00000306698"	"ENSP00000404562,ENSP00000373284,ENSP00000394613,ENSP00000389034,ENSP00000411200,ENSP00000413070,ENSP00000414960,ENSP00000394625,ENSP00000306581"
PH_hs_0062252	0.426064	0.0733182	0.592617	1.25488	SPANXD|SPANXB1|SPANXB2|SPANXE|SPANXC|SPANXF1|SPANXA2|SPANXA1	185.849	"SPANX family, member D|SPANX family, member B1|SPANX family, member B2|SPANX family, member E|SPANX family, member C|SPANX family, member F1|SPANX family, member A2|sperm protein associated with the nucleus, X-linked, family member A1"	4	64648|728695|100133171|171489|64663|171490|728712|30014	NM_032417.2|NM_032461.2|NM_145664.1|NM_145665.1|NM_022661.2|NM_139019.1|NM_145662.2|NM_013453.2	22027494|22027490|22027491|22027495|22027493|190570191|49619235|14192936	NP_115793.1|NP_115850.1|NP_663697.1|NP_663698.1|NP_073152.1|NP_620588.1|NP_663695.1|NP_038481.2	ENSG00000269838|ENSG00000196406|ENSG00000269309|ENSG00000235604|ENSG00000227234|ENSG00000268239|ENSG00000269063|ENSG00000269853|ENSG00000203926|ENSG00000198021|ENSG00000198573	ENST00000597815|ENST00000370515|ENST00000594260|ENST00000370530|ENST00000449283|ENST00000600641|ENST00000597736|ENST00000598204|ENST00000370518|ENST00000370519|ENST00000358993	ENSP00000472247|ENSP00000359546|ENSP00000472817|ENSP00000359561|ENSP00000405202|ENSP00000471479|ENSP00000472201|ENSP00000469053|ENSP00000359549|ENSP00000359550|ENSP00000351884
PH_hs_0046211	-0.449336	-0.0226902	-0.745739	-1.25366	GTPBP10	478.647	GTP-binding protein 10 (putative)	1	85865	"NM_033107.3,NM_001042717.2"	313760600;313760599	"NP_149098.2,NP_001036182.1"	NA	NA	NA
PH_hs_0044321	-0.538797	-0.242803	-0.412184	-1.2512	PHF6	158.21	PHD finger protein 6	1	84295	NM_032335.3	183603926	NP_115711.2	ENSG00000156531	ENST00000370800	ENSP00000359836
PH_hs_0006398	-0.349664	-0.431158	-0.427625	-1.24618	HDAC9	523.146	histone deacetylase 9	1	9734	"NM_178425.2,NM_178423.1"	116284377;30795201	"NP_848512.1,NP_848510.1"	ENSG00000048052	ENST00000406451	ENSP00000384657
PH_hs_0016217	-0.247624	-0.136885	-0.634064	-1.12855	SOX6	67.306	SRY (sex determining region Y)-box 6	1	55553	"NM_001145819.1,NM_001145811.1,NM_017508.2,NM_033326.3"	224967053;224967049;224967048;224967047	"NP_001139291.1,NP_001139283.1,NP_059978.1,NP_201583.2"	NA	NA	NA
PH_hs_0016601	0.468942	0.363429	0.382053	1.23737	MYLK3	1117.57	myosin light chain kinase 3	1	91807	NM_182493.2	146219831	NP_872299.2	ENSG00000140795	"ENST00000536476,ENST00000394809"	"ENSP00000439297,ENSP00000378288"
PH_hs_0060952	0.572972	0.118724	0.475958	1.23603	FAM115C	560.531	"family with sequence similarity 115, member C"	1	285966	NM_001130026.2	293651620	NP_001123498.2	ENSG00000170379	"ENST00000409703,ENST00000441159"	"ENSP00000386405,ENSP00000404265"
PH_hs_0024252	-0.625326	-0.0828978	-0.439343	-1.22421	RAD18	125.369	RAD18 homolog (S. cerevisiae)	1	56852	NM_020165.3	256818820	NP_064550.3	NA	NA	NA
PH_hs_0035792	-0.448926	-0.640554	-0.0202938	-1.22226	AKT2	129.688	v-akt murine thymoma viral oncogene homolog 2	1	208	"NM_001626.4,NM_001243028.1,NM_001243027.1"	339895851;339895854;339895852	"NP_001617.1,NP_001229957.1,NP_001229956.1"	ENSG00000105221	"ENST00000424901,ENST00000578615,ENST00000579047,ENST00000311278,ENST00000584288,ENST00000391844"	"ENSP00000399532,ENSP00000463262,ENSP00000471369,ENSP00000309428,ENSP00000462469,ENSP00000375719"
PH_hs_0036032	-0.694119	-0.130511	-0.276945	-1.22037	ZNF850	86.729	zinc finger protein 850	1	342892	"NM_001267779.1,NM_001193552.1"	392050771;302148469	"NP_001254708.1,NP_001180481.1"	NA	NA	NA
PH_hs_0016947	-0.773697	-0.0229328	-0.118946	-1.00299	ZNF396	76.227	zinc finger protein 396	1	252884	NM_145756.2	222352103	NP_665699.1	ENSG00000186496	ENST00000306346	ENSP00000302310
PH_hs_0003291	0.327071	0.386255	0.435282	1.2181	TCIRG1	894.388	"T-cell, immune regulator 1, ATPase, H+ transporting, lysosomal V0 subunit A3"	1	10312	"NM_006053.3,NM_006019.3"	314122261;314122259	"NP_006044.1,NP_006010.2"	ENSG00000110719	"ENST00000532635,ENST00000265686,ENST00000530063"	"ENSP00000434407,ENSP00000265686,ENSP00000432957"
PH_hs_0034411	-0.751842	-0.221575	-0.185516	-1.21505	ZNF208	142.144	zinc finger protein 208	1	7757	NM_007153.3	256418947	NP_009084.2	ENSG00000160321	ENST00000397126	ENSP00000380315
PH_hs_0019087	-0.145172	-0.203612	-0.50577	-1.08702	REST	126.885	RE1-silencing transcription factor	1	5978	"NM_001193508.1,NM_005612.4"	301897976;301897973	"NP_001180437.1,NP_005603.3"	NA	NA	NA
PH_hs_0010745	-0.181475	-0.710119	-0.199508	-1.21489	KCNC1	203.201	"potassium voltage-gated channel, Shaw-related subfamily, member 1"	1	3746	"NM_001112741.1,NM_004976.4"	163792200;163792199	"NP_001106212.1,NP_004967.1"	NA	NA	NA
PH_hs_0016437	-0.714249	-0.0206245	-0.396352	-1.20992	CEP19	145.911	centrosomal protein 19kDa	1	84984	NM_032898.3	190885492	NP_116287.2	NA	NA	NA
PH_hs_0000553	0.700265	0.221728	0.292854	1.20986	EPS8L3	2281.14	EPS8-like 3	1	79574	"NM_024526.3,NM_133181.3,NM_139053.2"	320118889;320118888;320118887	"NP_078802.2,NP_573444.2,NP_620641.1"	ENSG00000198758	"ENST00000369805,ENST00000361852"	"ENSP00000358820,ENSP00000354551"
PH_hs_0022052	-0.447755	-0.252601	-0.243044	-1.0621	SIKE1	101.344	suppressor of IKBKE 1	1	80143	"NM_001102396.1,NM_025073.2,NR_049742.1,NR_049741.1"	156151378;156151376;387942383;387942382	"NP_001095866.1,NP_079349.2,-"	ENSG00000052723	ENST00000060969	ENSP00000060969
PH_hs_0060089	0.795155	0.0375649	0.355453	1.2083	CDH23	834.392	cadherin-related 23	1	64072	NM_001171932.1	284925131	NP_001165403.1	NA	NA	NA
PH_hs_0022233	0.243444	0.0361895	0.909937	1.41141	SOX17	137.046	SRY (sex determining region Y)-box 17	1	64321	NM_022454.3	145275218	NP_071899.1	ENSG00000164736	ENST00000297316	ENSP00000297316
PH_hs_0022331	0.619683	0.0240423	0.451218	1.21471	GAB3	324.499	GRB2-associated binding protein 3	1	139716	"NM_001081573.1,NM_080612.2"	126091129;126091132	"NP_001075042.1,NP_542179.1"	ENSG00000268699|ENSG00000160219	ENST00000596917|ENST00000369575	ENSP00000468967|ENSP00000358588
PH_hs_0026204	0.751133	0.0469105	0.3333	1.20639	ANKK1	126.153	ankyrin repeat and kinase domain containing 1	1	255239	NM_178510.1	30425443	NP_848605.1	ENSG00000170209	ENST00000303941	ENSP00000306678
PH_hs_0022703	-0.335074	-0.379405	-0.203244	-1.06046	PRKCE	88.2586	"protein kinase C, epsilon"	1	5581	NM_005400.2	47157326	NP_005391.1	NA	NA	NA
PH_hs_0046378	-0.393738	-0.420793	-0.273233	-1.20593	ZNF773	112.168	zinc finger protein 773	1	374928	NM_198542.1	38524613	NP_940944.1	ENSG00000152439	"ENST00000282292,ENST00000598770"	"ENSP00000282292,ENSP00000469416"
PH_hs_0022750	-0.604768	-0.180796	-0.201939	-1.06553	SETD7	67.9493	SET domain containing (lysine methyltransferase) 7	1	80854	NM_030648.2	83035135	NP_085151.1	NA	NA	NA
PH_hs_0045050	-0.247914	-0.0457402	-0.782088	-1.19724	INTS6	99.1712	integrator complex subunit 6	1	26512	NM_001039938.1	90193623	NP_001035027.1	ENSG00000102786	ENST00000442263	ENSP00000411245
PH_hs_0026240	0.699517	0.0304612	0.324823	1.19571	ADM2	262.186	adrenomedullin 2	1	79924	"NM_001253845.1,NM_024866.5"	359718925;359718924	"NP_001240774.1,NP_079142.2"	NA	NA	NA
PH_hs_0048806	-0.709867	-0.0139134	-0.427614	-1.1951	ZNF277	214.165	zinc finger protein 277	1	11179	NM_021994.2	126723500	NP_068834.2	NA	NA	NA
PH_hs_0061475	0.559473	0.0784272	0.542366	1.19459	GNRHR	1608.01	gonadotropin-releasing hormone receptor	1	2798	"NM_000406.2,NM_001012763.1"	61676182;61676183	"NP_000397.1,NP_001012781.1"	ENSG00000109163	ENST00000226413	ENSP00000226413
PH_hs_0040797	-0.201337	-0.580003	-0.237789	-1.18773	B4GALNT4	97.9119	"beta-1,4-N-acetyl-galactosaminyl transferase 4"	1	338707	NM_178537.4	227498915	NP_848632.2	NA	NA	NA
PH_hs_0010099	-0.598878	-0.410758	-0.0842286	-1.17925	TMX4	171.271	thioredoxin-related transmembrane protein 4	1	56255	NM_021156.2	40254946	NP_066979.2	NA	NA	NA
PH_hs_0023912	-0.51686	-0.0598409	-0.585103	-1.24275	WDR17	139.177	WD repeat domain 17	1	116966	"NM_181265.3,NM_170710.4"	266457047;266457004	"NP_851782.3,NP_733828.2"	ENSG00000150627	"ENST00000507824,ENST00000280190,ENST00000508596"	"ENSP00000422200,ENSP00000280190,ENSP00000422763"
PH_hs_0003124	-0.569318	-0.106924	-0.482221	-1.17756	MSH3	1610.08	mutS homolog 3 (E. coli)	1	4437	NM_002439.4	390517033	NP_002430.3	ENSG00000113318	ENST00000265081	ENSP00000265081
PH_hs_0036035	-0.690659	-0.4229	-0.0122783	-1.17742	BOD1L1	216.865	biorientation of chromosomes in cell division 1-like 1	1	259282	NM_148894.2	87299627	NP_683692.2	NA	NA	NA
PH_hs_0002445	-0.400307	-0.287272	-0.441831	-1.17456	SEMA5A	753.648	"sema domain, seven thrombospondin repeats (type 1 and type 1-like), transmembrane domain (TM) and short cytoplasmic domain, (semaphorin) 5A"	1	9037	NM_003966.2	147904699	NP_003957.2	NA	NA	NA
PH_hs_0024257	0.799816	0.0751055	0.185553	1.09646	CCND2	164.099	cyclin D2	1	894	NM_001759.3	209969683	NP_001750.1	ENSG00000118971	ENST00000261254	ENSP00000261254
PH_hs_0062503	0.739237	0.143934	0.279334	1.17443	LOC100652741	1007.14	protein capicua homolog	1	100652741	"XM_003960779.1,XM_003403479.1,XM_003846613.1"	410173618;341915866;397137904	"XP_003960828.1,XP_003403527.1,XP_003846661.1"	NA	NA	NA
PH_hs_0024562	-0.70011	-0.0576001	-0.174532	-1.01594	N4BP2	82.0888	NEDD4 binding protein 2	1	55728	NM_018177.4	339275991	NP_060647.2	ENSG00000078177	ENST00000513269	ENSP00000426430
PH_hs_0046432	0.483781	0.119749	0.515266	1.17307	LOC541473	739.807	"FK506 binding protein 6, 36kDa pseudogene"	1	541473	NR_003602.2	392871547	-	NA	NA	NA
PH_hs_0013072	0.299284	0.532739	0.239576	1.17305	CD68	519.588	CD68 molecule	1	968	"NM_001040059.1,NM_001251.2"	91199549;91199547	"NP_001035148.1,NP_001242.2"	ENSG00000129226	"ENST00000584180,ENST00000380498,ENST00000250092"	"ENSP00000462198,ENSP00000369867,ENSP00000250092"
PH_hs_0032542	-0.394523	-0.148368	-0.586774	-1.17126	ZNF655	688.217	zinc finger protein 655	1	79027	"NM_001009960.1,NM_001085368.1,NM_001083956.1,NM_138494.2"	58331263;145701020;145701014;58331258	"NP_001009960.1,NP_001078837.1,NP_001077425.1,NP_612503.1"	NA	NA	NA
PH_hs_0034159	-0.652351	-0.205257	-0.296435	-1.17063	ZNF271	209.922	zinc finger protein 271	1	10778	"NR_024565.1,NR_024566.1"	217035127;217035128	-	NA	NA	NA
PH_hs_0024886	0.233944	0.142668	0.483758	1.01886	SKAP1	234.783	src kinase associated phosphoprotein 1	1	8631	"NM_001075099.1,NM_003726.3"	115527075;115527073	"NP_001068567.1,NP_003717.3"	ENSG00000141293	"ENST00000581419,ENST00000581400,ENST00000584924,ENST00000584709,ENST00000336915"	"ENSP00000462437,ENSP00000462360,ENSP00000464311,ENSP00000463284,ENSP00000338171"
PH_hs_0060432	0.460386	0.00459544	0.635776	1.1667	NFAT5	784.185	"nuclear factor of activated T-cells 5, tonicity-responsive"	1	10725	NM_173215.2	342672016	NP_775322.1	ENSG00000102908	ENST00000566899	ENSP00000455628
PH_hs_0027950	-0.619983	-0.0359446	-0.444372	-1.16526	ZNF268	188.833	zinc finger protein 268	1	10795	"NM_001165884.2,NM_001165882.2,NM_001165881.2,NM_001165887.1,NM_001165886.1,NM_001165885.1,NM_001165883.1,NM_152943.2,NM_003415.2"	298358579;298358576;298358568;259490342;259490338;259490334;259490326;259490311;259490308	"NP_001159356.2,NP_001159354.1,NP_001159353.1,NP_001159359.1,NP_001159358.1,NP_001159357.1,NP_001159355.1,NP_694422.2,NP_003406.1"	ENSG00000090612	"ENST00000537565,ENST00000541009,ENST00000542986,ENST00000536899,ENST00000228289"	"ENSP00000445713,ENSP00000439539,ENSP00000443721,ENSP00000438941,ENSP00000228289"
PH_hs_0043099	0.474761	0.0523263	0.551484	1.16282	SLC25A48	629.254	"solute carrier family 25, member 48"	1	153328	NM_145282.4	223468575	NP_660325.4	ENSG00000145832	ENST00000412661	ENSP00000413049
PH_hs_0028368	-0.272545	-0.197066	-0.584202	-1.16044	FAM91A1	122.078	"family with sequence similarity 91, member A1"	1	157769	NM_144963.2	84000431	NP_659400.2	NA	NA	NA
PH_hs_0046473	0.641774	0.22649	0.269476	1.15994	BET3L	824.865	BET3 like (S. cerevisiae)	1	100128327	NM_001139444.2	228008411	NP_001132916.1	ENSG00000173626	"ENST00000368602,ENST00000437098"	"ENSP00000357591,ENSP00000395769"
PH_hs_0025760	0.42858	0.140959	0.390944	1.0511	SLC16A7	111.151	"solute carrier family 16, member 7 (monocarboxylic acid transporter 2)"	1	9194	"NM_001270622.1,NM_001270623.1,NR_073056.1,NR_073055.1,NM_004731.4"	397739032;397739030;398303862;398303861;397739029	"NP_001257551.1,NP_001257552.1,-,NP_004722.2"	NA	NA	NA
PH_hs_0060047	-0.157645	-0.306776	-0.574725	-1.15609	ACBD4	136.898	acyl-CoA binding domain containing 4	1	79777	NM_001135707.1	209364599	NP_001129179.1	ENSG00000181513	ENST00000376955	ENSP00000366154
PH_hs_0026014	-0.563441	-0.0315421	-0.471392	-1.12352	ALS2CR8	45.0942	"amyotrophic lateral sclerosis 2 (juvenile) chromosome region, candidate 8"	1	79800	"NM_024744.14,NM_001104586.1"	157168370;157168371	"NP_079020.13,NP_001098056.1"	ENSG00000138380	"ENST00000545262,ENST00000545253,ENST00000438828,ENST00000428585,ENST00000414439,ENST00000402905"	"ENSP00000440467,ENSP00000439769,ENSP00000414644,ENSP00000396221,ENSP00000416160,ENSP00000384006"
PH_hs_0003748	-0.183644	-0.336023	-0.522468	-1.15206	ADAMTS5	136.936	"ADAM metallopeptidase with thrombospondin type 1 motif, 5"	1	11096	NM_007038.3	195539371	NP_008969.2	NA	NA	NA
PH_hs_0033011	-0.802395	-0.102732	-0.130568	-1.14897	C4orf21	82.2941	chromosome 4 open reading frame 21	1	55345	NM_018392.4	254826808	NP_060862.3	ENSG00000138658	ENST00000309071	ENSP00000309095
PH_hs_0060306	-0.750031	-0.24996	-0.0753294	-1.14857	NEK2	128.634	NIMA-related kinase 2	1	4751	NM_001204183.1	323510689	NP_001191112.1	ENSG00000117650	ENST00000366998	ENSP00000355965
PH_hs_0061933	-0.905574	-0.126423	-0.102284	-1.14625	LIMS1	1611.59	LIM and senescent cell antigen-like domains 1	1	3987	"NM_001193488.1,NM_001193484.1,NM_001193482.1,NM_001193485.2,NM_004987.5,NM_001193483.2"	301601629;301601608;301601604;336455030;336455029;336455028	"NP_001180417.1,NP_001180413.1,NP_001180411.1,NP_001180414.1,NP_004978.2,NP_001180412.1"	NA	NA	NA
PH_hs_0026612	-0.23425	-0.441834	-0.265966	-1.03085	SDCCAG8	90.9825	serologically defined colon cancer antigen 8	1	10806	NM_006642.3	308210778	NP_006633.1	ENSG00000054282	"ENST00000343783,ENST00000355875,ENST00000435549,ENST00000366541"	"ENSP00000341260,ENSP00000348137,ENSP00000410200,ENSP00000355499"
PH_hs_0061000	0.608918	0.31513	0.202374	1.14439	RNF183	1088.65	ring finger protein 183	1	138065	NM_145051.3	153252109	NP_659488.2	ENSG00000165188	"ENST00000297894,ENST00000478815,ENST00000416588,ENST00000441031"	"ENSP00000417943,ENSP00000419454,ENSP00000420740,ENSP00000417176"
PH_hs_0006975	0.671919	0.0880027	0.382335	1.14426	DNAJB3|LOC100286922	2652.25	"DnaJ (Hsp40) homolog, subfamily B, member 3|DnaJ (Hsp40) homolog, subfamily B, member 3 pseudogene"	4	414061|100286922	NM_001001394.3|NR_037694.1	157786298|317171914	NP_001001394.1|-	NA	NA	NA
PH_hs_0027651	-0.326433	-0.167508	-0.470222	-1.10067	TNFRSF10B	76.162	"tumor necrosis factor receptor superfamily, member 10b"	1	8795	"NR_027140.1,NM_147187.2,NM_003842.4"	224494036;224494025;224494018	"-,NP_671716.2,NP_003833.4"	NA	NA	NA
PH_hs_0048342	-0.310633	-0.238365	-0.48902	-1.14131	FAM111B	130.677	"family with sequence similarity 111, member B"	1	374393	"NM_001142704.1,NM_001142703.1,NM_198947.3"	218156274;218156272;218156271	"NP_001136176.1,NP_001136175.1,NP_945185.1"	ENSG00000189057	"ENST00000411426,ENST00000343597,ENST00000529618"	"ENSP00000393855,ENSP00000341565,ENSP00000432875"
PH_hs_0027768	-0.541884	-0.0851908	-0.375448	-1.10004	SPIN4	70.4166	"spindlin family, member 4"	1	139886	NM_001012968.2	108796660	NP_001012986.2	NA	NA	NA
PH_hs_0027842	0.303084	0.0287147	2.89564	3.56064	ABCA7	2223.73	"ATP-binding cassette, sub-family A (ABC1), member 7"	1	10347	NM_019112.3	150417983	NP_061985.2	NA	NA	NA
PH_hs_0061642	-0.337977	-0.0713205	-0.638167	-1.13886	BRWD1	152.259	bromodomain and WD repeat domain containing 1	1	54014	"NM_018963.4,NM_033656.3"	335057563;335057561	"NP_061836.2,NP_387505.1"	NA	NA	NA
PH_hs_0027855	-0.295148	-0.0793269	-0.577607	-1.0489	FIGNL1	31.8034	fidgetin-like 1	1	63979	"NM_022116.3,NM_001042762.1"	112789544;112789542	"NP_071399.2,NP_001036227.1"	ENSG00000132436	"ENST00000448788,ENST00000420829"	"ENSP00000402957,ENSP00000409281"
PH_hs_0023749	-0.670921	-0.0962589	-0.32156	-1.13796	PRELID2	181.027	PRELI domain containing 2	1	153768	"NM_205846.1,NM_182960.2,NM_138492.4"	45593131;45545422;45505153	"NP_995318.1,NP_892005.1,NP_612501.3"	ENSG00000186314	"ENST00000358004,ENST00000334744"	"ENSP00000350694,ENSP00000335675"
PH_hs_0024773	0.689669	0.0762409	0.320169	1.13786	CD55	528.679	"CD55 molecule, decay accelerating factor for complement (Cromer blood group)"	1	1604	"NM_001114752.1,NM_000574.3"	168693642;167621447	"NP_001108224.1,NP_000565.1"	ENSG00000196352	"ENST00000367062,ENST00000391920,ENST00000367065,ENST00000314754,ENST00000391921,ENST00000367064"	"ENSP00000356029,ENSP00000375787,ENSP00000356032,ENSP00000316333,ENSP00000375788,ENSP00000356031"
PH_hs_0044210	-0.462862	-0.282891	-0.3161	-1.13647	TRIM14	177.917	tripartite motif containing 14	1	9830	"NM_033219.1,NM_033220.1"	15208664;15208666	"NP_150088.1,NP_150089.1"	ENSG00000106785	"ENST00000475147,ENST00000342043,ENST00000375098"	"ENSP00000428805,ENSP00000343990,ENSP00000364239"
PH_hs_0023548	-0.306334	-0.0290432	-0.722398	-1.13544	CCDC88A	201.361	coiled-coil domain containing 88A	1	55704	"NM_018084.4,NM_001135597.1,NM_001254943.1"	208022633;208022631;363807221	"NP_060554.3,NP_001129069.1,NP_001241872.1"	ENSG00000115355	"ENST00000413716,ENST00000456975,ENST00000412148"	"ENSP00000404431,ENSP00000415267,ENSP00000390012"
PH_hs_0061046	0.710059	0.151901	0.271366	1.13528	CDH8	2931.11	"cadherin 8, type 2"	1	1006	NM_001796.4	332688225	NP_001787.2	NA	NA	NA
PH_hs_0060673	0.813192	0.124427	0.216192	1.13414	DLX1	1687.58	distal-less homeobox 1	1	1745	"NM_001038493.1,NM_178120.4"	84043955;84043957	"NP_001033582.1,NP_835221.2"	ENSG00000144355	"ENST00000469444,ENST00000361609"	"ENSP00000448827,ENSP00000354865"
PH_hs_0028232	-0.4248	-0.284969	-0.299104	-1.07312	ZNF345	96.3309	zinc finger protein 345	1	25850	"NM_001242475.1,NM_001242472.1,NM_003419.4"	335057552;335057545;335057544	"NP_001229404.1,NP_001229401.1,NP_003410.1"	ENSG00000251247	"ENST00000331800,ENST00000526123"	"ENSP00000331120,ENSP00000467611"
PH_hs_0005110	0.672311	0.088642	0.239222	1.13343	FRMPD4	246.428	FERM and PDZ domain containing 4	1	9758	NM_014728.3	284172515	NP_055543.2	NA	NA	NA
PH_hs_0000191	0.571626	0.0621631	0.378135	1.13271	FMO1	310.507	flavin containing monooxygenase 1	1	2326	NM_002021.1	4503754	NP_002012.1	ENSG00000010932	"ENST00000354841,ENST00000367750"	"ENSP00000346901,ENSP00000356724"
PH_hs_0039663	-0.551992	-0.0379516	-0.489993	-1.1323	ZNF765	222.751	zinc finger protein 765	1	91661	NM_001040185.1	93277109	NP_001035275.1	ENSG00000196417	ENST00000396408	ENSP00000379689
PH_hs_0049068	-0.499375	-0.0630066	-0.493906	-1.13116	ZNF268	140.703	zinc finger protein 268	1	10795	"NM_001165884.2,NM_001165882.2,NM_001165881.2,NM_001165887.1,NM_001165886.1,NM_001165885.1,NM_001165883.1,NM_152943.2,NM_003415.2"	298358579;298358576;298358568;259490342;259490338;259490334;259490326;259490311;259490308	"NP_001159356.2,NP_001159354.1,NP_001159353.1,NP_001159359.1,NP_001159358.1,NP_001159357.1,NP_001159355.1,NP_694422.2,NP_003406.1"	ENSG00000090612	ENST00000536435	ENSP00000444412
PH_hs_0028484	-0.843756	-0.0245356	-0.164594	-1.05199	FAM177A1	205.84	"family with sequence similarity 177, member A1"	1	283635	"NM_001079519.1,NM_173607.3"	118498365;118498370	"NP_001072987.1,NP_775878.2"	NA	NA	NA
PH_hs_0028567	0.663364	0.0859476	0.375482	1.23462	APOC4	166.775	apolipoprotein C-IV	1	346	NM_001646.2	325651851	NP_001637.1	ENSG00000267467|ENSG00000224916	ENST00000592954|ENST00000436871	ENSP00000468236|ENSP00000412935
PH_hs_0023582	-0.662877	-0.0961136	-0.26617	-1.12762	RAB27A	84.775	"RAB27A, member RAS oncogene family"	1	5873	"NM_183234.2,NM_004580.4,NM_183236.2,NM_183235.2"	332078504;332078501;332078500;332078499	"NP_899057.1,NP_004571.2,NP_899059.1,NP_899058.1"	ENSG00000069974	ENST00000336787	ENSP00000337761
PH_hs_0014669	-0.618078	-0.148885	-0.310284	-1.12643	KIAA1704	190.835	KIAA1704	1	55425	NM_018559.2	33354278	NP_061029.2	ENSG00000133114	"ENST00000357537,ENST00000379151"	"ENSP00000350145,ENSP00000368447"
PH_hs_0041102	-0.386418	-0.280651	-0.320824	-1.12571	ZFP62	86.3046	ZFP62 zinc finger protein	1	643836	"NM_001172638.1,NM_152283.4"	289547561;289547559	"NP_001166109.1,NP_689496.4"	ENSG00000196670	"ENST00000509066,ENST00000506439,ENST00000504225"	"ENSP00000424156,ENSP00000423709,ENSP00000422987"
PH_hs_0061077	0.411604	0.484013	0.185086	1.12475	SCAF1	876.526	SR-related CTD-associated factor 1	1	58506	NM_021228.2	226509739	NP_067051.2	ENSG00000126461	ENST00000598359	ENSP00000473210
PH_hs_0030285	0.377044	0.205562	0.31551	1.00525	TBXA2R	411.577	thromboxane A2 receptor	1	6915	NM_201636.2	260593680	NP_963998.2	ENSG00000006638	ENST00000411851	ENSP00000393333
PH_hs_0022471	-0.532142	-0.213148	-0.313788	-1.12389	ZNF566	157.851	zinc finger protein 566	1	84924	"NM_001145345.1,NM_032838.4,NM_001145344.1,NM_001145343.1"	223890214;223890213;223890211;223890209	"NP_001138817.1,NP_116227.1,NP_001138816.1,NP_001138815.1"	ENSG00000186017	"ENST00000424129,ENST00000392170"	"ENSP00000401259,ENSP00000376010"
PH_hs_0016918	0.981153	0.169033	0.025999	1.12063	STAU2-AS1	865.208	STAU2 antisense RNA 1	1	100128126	NR_038406.1	336088628	-	NA	NA	NA
PH_hs_0030610	-0.175938	-0.180593	-0.828465	-1.28838	ZBTB33	229.024	zinc finger and BTB domain containing 33	1	10009	"NM_001184742.1,NM_006777.3"	296179375;41152068	"NP_001171671.1,NP_006768.1"	ENSG00000269603|ENSG00000177485	ENST00000602186|ENST00000557385	ENSP00000470483|ENSP00000450969
PH_hs_0034165	-0.344266	-0.336273	-0.286174	-1.11816	ZNF836	76.8053	zinc finger protein 836	1	162962	NM_001102657.1	156627572	NP_001096127.1	ENSG00000196267	"ENST00000322146,ENST00000597252"	"ENSP00000325038,ENSP00000470239"
PH_hs_0061724	-0.471696	-0.260574	-0.290941	-1.11768	USP45	114.327	ubiquitin specific peptidase 45	1	85015	NM_001080481.1	122937411	NP_001073950.1	NA	NA	NA
PH_hs_0031211	-0.724359	-0.0164179	-0.277502	-1.09198	ELAC1	65.7764	elaC homolog 1 (E. coli)	1	55520	NM_018696.2	50726987	NP_061166.1	ENSG00000141642	ENST00000269466	ENSP00000269466
PH_hs_0031489	1.15968	0.0246707	0.155574	1.28152	BNC2	53.0126	basonuclin 2	1	54796	NM_017637.5	94721326	NP_060107.3	ENSG00000173068	ENST00000380672	ENSP00000370047
PH_hs_0048820	-0.00783846	-0.230098	-0.805451	-1.11738	FIP1L1	273.974	FIP1 like 1 (S. cerevisiae)	1	81608	"NM_001134938.1,NM_001134937.1,NM_030917.3"	201023340;201023338;201023337	"NP_001128410.1,NP_001128409.1,NP_112179.2"	ENSG00000145216	ENST00000504094	ENSP00000421691
PH_hs_0016308	-0.344594	-0.278251	-0.407824	-1.11647	GINS4	189.781	GINS complex subunit 4 (Sld5 homolog)	1	84296	NM_032336.2	223029408	NP_115712.1	ENSG00000147536	"ENST00000518671,ENST00000520354"	"ENSP00000428754,ENSP00000429894"
PH_hs_0002926	0.664097	0.150273	0.31539	1.11584	ALPI	8412.37	"alkaline phosphatase, intestinal"	1	248	NM_001631.3	157266291	NP_001622.2	ENSG00000163295	ENST00000295463	ENSP00000295463
PH_hs_0031799	0.777226	0.0218335	0.323502	1.11542	LGALS16|LGALS14|LGALS13	2971.23	"lectin, galactoside-binding, soluble, 16|lectin, galactoside-binding, soluble, 14|lectin, galactoside-binding, soluble, 13"	4	148003|56891|29124	"NM_001190441.1|NM_203471.1,NM_020129.2|NM_013268.2"	298919184|45439324;45439323|20302163	"NP_001177370.1|NP_982297.1,NP_064514.1|NP_037400.1"	ENSG00000249861|ENSG00000006659|ENSG00000105198	"ENST00000594480,ENST00000392051|ENST00000392052|ENST00000221797"	"ENSP00000471564,ENSP00000375904|ENSP00000375905|ENSP00000221797"
PH_hs_0062044	0.477658	0.0444212	0.47345	1.11467	FCGR1A|FCGR1B	369.097	"Fc fragment of IgG, high affinity Ia, receptor (CD64)|Fc fragment of IgG, high affinity Ib, receptor (CD64)"	4	2209|2210	"NM_000566.3|NM_001004340.3,NM_001017986.3,NR_045213.1"	167621452|349732138;349732137;349732146	"NP_000557.1|NP_001004340.2,NP_001017986.1,-"	ENSG00000266332|ENSG00000150337	ENST00000580698|ENST00000369168	ENSP00000462402|ENSP00000358165
PH_hs_0018936	-0.739106	-0.0234064	-0.309755	-1.11359	PNPT1	150.254	polyribonucleotide nucleotidyltransferase 1	1	87178	NM_033109.4	429484497	NP_149100.2	ENSG00000138035	"ENST00000260604,ENST00000415374"	"ENSP00000260604,ENSP00000393953"
PH_hs_0027286	0.176754	0.124344	0.635045	1.11133	ZNF671	257.035	zinc finger protein 671	1	79891	NM_024833.2	190610005	NP_079109.2	ENSG00000083814	"ENST00000317398,ENST00000600125"	"ENSP00000321848,ENSP00000471087"
PH_hs_0005767	0.658571	0.208918	0.235011	1.10886	MUC7	1473.4	"mucin 7, secreted"	1	4589	"NM_001145007.1,NM_001145006.1,NM_152291.2"	222418648;222418646;222418644	"NP_001138479.1,NP_001138478.1,NP_689504.2"	ENSG00000171195	"ENST00000456088,ENST00000413702,ENST00000304887"	"ENSP00000400585,ENSP00000407422,ENSP00000302021"
PH_hs_0028045	-0.465605	-0.193435	-0.371422	-1.1085	GXYLT1	143.081	glucoside xylosyltransferase 1	1	283464	"NM_001099650.1,NM_173601.1"	153791275;153791361	"NP_001093120.1,NP_775872.1"	NA	NA	NA
PH_hs_0062320	0.665831	0.00472007	0.424617	1.10635	SPATA1	1863.57	spermatogenesis associated 1	1	100505741	"XM_003960123.1,XM_003118960.3,XM_003119805.3"	410171199;397138886;397138015	"XP_003960172.1,XP_003119008.3,XP_003119853.3"	NA	NA	NA
PH_hs_0060458	0.387966	0.0136153	0.546736	1.10501	AGAP1	242.804	"ArfGAP with GTPase domain, ankyrin repeat and PH domain 1"	1	116987	NM_001244888.1	349585206	NP_001231817.1	ENSG00000157985	ENST00000409457	ENSP00000387174
PH_hs_0002414	-0.524866	-0.0642418	-0.447599	-1.10332	CACYBP	174.96	calcyclin binding protein	1	27101	"NM_014412.2,NM_001007214.1"	55925645;60218912	"NP_055227.1,NP_001007215.1"	ENSG00000116161	"ENST00000367679,ENST00000367681"	"ENSP00000356652,ENSP00000356654"
PH_hs_0033370	-0.32115	-0.300625	-0.2626	-1.03329	WDR37	87.7316	WD repeat domain 37	1	22884	NM_014023.3	71164896	NP_054742.2	ENSG00000047056	"ENST00000436154,ENST00000381329"	"ENSP00000404346,ENSP00000370730"
PH_hs_0033499	-0.412922	-0.189945	-0.905463	-1.64422	C4orf21	102.045	chromosome 4 open reading frame 21	1	55345	NM_018392.4	254826808	NP_060862.3	ENSG00000138658	"ENST00000445413,ENST00000505019"	"ENSP00000404365,ENSP00000424737"
PH_hs_0002631	-0.474069	-0.150175	-0.411509	-1.103	LZTFL1	135.509	leucine zipper transcription factor-like 1	1	54585	NM_020347.2	56676319	NP_065080.1	NA	NA	NA
PH_hs_0035583	0.655963	0.139439	0.284604	1.10276	NIPAL1	798.551	NIPA-like domain containing 1	1	152519	NM_207330.1	46409301	NP_997213.1	NA	NA	NA
PH_hs_0034260	0.0532472	0.112307	1.24609	1.45763	ACTR2	1165.32	ARP2 actin-related protein 2 homolog (yeast)	1	10097	"NM_005722.3,NM_001005386.2"	205361120;205361119	"NP_005713.1,NP_001005386.1"	ENSG00000138071	ENST00000377982	ENSP00000367220
PH_hs_0016070	-0.173551	-0.0916139	-0.741535	-1.10152	RAMP2-AS1	258.976	RAMP2 antisense RNA 1	1	100190938	"NR_024462.1,NR_024461.1"	213385284;213385281	-	NA	NA	NA
PH_hs_0040675	-0.655951	-0.262383	-0.140799	-1.09981	ZNF33A	245.479	zinc finger protein 33A	1	7581	"NM_006974.2,NM_006954.1"	110347444;110347445	"NP_008905.1,NP_008885.1"	NA	NA	NA
PH_hs_0023569	-0.597083	-0.0187473	-0.433933	-1.09789	RUFY2	226.043	RUN and FYVE domain containing 2	1	55680	"NM_017987.4,NM_001042417.1"	109240555;109240551	"NP_060457.4,NP_001035882.1"	ENSG00000204130	"ENST00000454950,ENST00000466493"	"ENSP00000404986,ENSP00000433197"
PH_hs_0026466	-0.551256	-0.192819	-0.2911	-1.09712	NEGR1	145.011	neuronal growth regulator 1	1	257194	NM_173808.2	66346705	NP_776169.2	NA	NA	NA
PH_hs_0046542	0.611387	0.213165	0.238114	1.09379	KRTAP5-7	518.623	keratin associated protein 5-7	1	440050	NM_001012503.1	60279696	NP_001012521.1	ENSG00000244411|ENSG00000172890	ENST00000398536|ENST00000526622	ENSP00000417330|ENSP00000432217
PH_hs_0028168	-0.124721	-0.190281	-0.672377	-1.09373	ZNF426	180.37	zinc finger protein 426	1	79088	NM_024106.1	13129115	NP_077011.1	NA	NA	NA
PH_hs_0000011	0.329945	0.350803	0.364564	1.09324	IL1RL1	810.234	interleukin 1 receptor-like 1	1	9173	NM_003856.2	27894327	NP_003847.2	ENSG00000115602	ENST00000409584	ENSP00000386618
PH_hs_0035613	-0.36826	-0.31256	-0.322036	-1.07643	TEAD1	193.018	TEA domain family member 1 (SV40 transcriptional enhancer factor)	1	7003	NM_021961.5	296434318	NP_068780.2	NA	NA	NA
PH_hs_0046172	-0.280541	-0.266231	-0.506437	-1.0916	ALS2CR8	382.983	"amyotrophic lateral sclerosis 2 (juvenile) chromosome region, candidate 8"	1	79800	"NM_024744.14,NM_001104586.1"	157168370;157168371	"NP_079020.13,NP_001098056.1"	ENSG00000138380	ENST00000320443	ENSP00000316224
PH_hs_0035791	-0.746944	-0.00249042	-0.310319	-1.10574	ZNF354B	144.471	zinc finger protein 354B	1	117608	NM_058230.2	207450730	NP_478137.1	NA	NA	NA
PH_hs_0013146	0.537125	0.156657	0.359372	1.09146	GABRA4	900.819	"gamma-aminobutyric acid (GABA) A receptor, alpha 4"	1	2557	"NM_001204267.1,NM_001204266.1,NM_000809.3"	324021690;324021687;324021686	"NP_001191196.1,NP_001191195.1,NP_000800.2"	ENSG00000109158	ENST00000264318	ENSP00000264318
PH_hs_0028435	-0.116636	-0.0247743	-0.827767	-1.09041	ITGAV	145.46	"integrin, alpha V"	1	3685	"NM_001145000.1,NM_001144999.1,NM_002210.3"	223468596;223468594;223468593	"NP_001138472.1,NP_001138471.1,NP_002201.1"	NA	NA	NA
PH_hs_0042628	0.44523	0.350537	0.161752	1.09016	OR5AN1	435.729	"olfactory receptor, family 5, subfamily AN, member 1"	1	390195	NM_001004729.1	52317110	NP_001004729.1	ENSG00000176495	ENST00000313940	ENSP00000320302
PH_hs_0032792	0.705311	0.15824	0.223398	1.08829	ARSH	3110.47	"arylsulfatase family, member H"	1	347527	NM_001011719.1	58743318	NP_001011719.1	ENSG00000205667	ENST00000381130	ENSP00000370522
PH_hs_0062059	0.614422	0.0960018	0.381405	1.08677	KRTAP5-2|KRTAP5-11|KRTAP5-10	1725.12	keratin associated protein 5-2|keratin associated protein 5-11|keratin associated protein 5-10	4	440021|440051|387273	"NM_001004325.1|NM_001005405.2|XM_003846553.1,NM_001012710.1"	51972219|123173798|397137318;60593039	"NP_001004325.1|NP_001005405.1|XP_003846601.1,NP_001012728.1"	ENSG00000205867|ENSG00000187811|ENSG00000204571|ENSG00000204572	ENST00000412090|ENST00000343767|ENST00000398530|ENST00000398531	ENSP00000400041|ENSP00000345469|ENSP00000381541|ENSP00000381542
PH_hs_0036187	-0.513695	-0.261724	-0.359714	-1.2538	C17orf104	108.735	chromosome 17 open reading frame 104	1	284071	NM_001145080.2	274315852	NP_001138552.2	ENSG00000180336	ENST00000359945	ENSP00000353028
PH_hs_0004305	0.681573	0.29969	0.0329542	1.08631	ITIH2	422.082	inter-alpha-trypsin inhibitor heavy chain 2	1	3698	NM_002216.2	70778917	NP_002207.2	ENSG00000151655	"ENST00000379587,ENST00000358415"	"ENSP00000368906,ENSP00000351190"
PH_hs_0046346	0.732512	0.277345	0.0806725	1.0835	ZNF326	1244.68	zinc finger protein 326	1	284695	NM_182975.2	156523256	NP_892020.1	ENSG00000162664	ENST00000361911	ENSP00000355318
PH_hs_0037849	-0.811996	-0.0325364	-0.109073	-1.00032	KIF27	62.4605	kinesin family member 27	1	55582	"NM_001271928.1,NM_001271927.1,NM_017576.2"	429535823;429535821;429535820	"NP_001258857.1,NP_001258856.1,NP_060046.1"	ENSG00000165115	"ENST00000334204,ENST00000413982,ENST00000297814"	"ENSP00000333928,ENSP00000401688,ENSP00000297814"
PH_hs_0024000	-0.627756	-0.11395	-0.231766	-1.08266	TNFAIP8L1	92.5257	"tumor necrosis factor, alpha-induced protein 8-like 1"	1	126282	"NM_152362.2,NM_001167942.1"	269846917;269846911	"NP_689575.2,NP_001161414.1"	NA	NA	NA
PH_hs_0038657	-0.348596	-0.220115	-0.376534	-1.04002	NXPH2	45.4536	neurexophilin 2	1	11249	NM_007226.2	221307582	NP_009157.1	NA	NA	NA
PH_hs_0000991	0.0730048	0.293198	0.648893	1.08135	ANGPTL4	1071.84	angiopoietin-like 4	1	51129	"NM_001039667.1,NM_139314.1"	89264695;21536397	"NP_001034756.1,NP_647475.1"	ENSG00000167772	"ENST00000541807,ENST00000593998,ENST00000393962,ENST00000595079,ENST00000301455"	"ENSP00000439833,ENSP00000472551,ENSP00000377534,ENSP00000473025,ENSP00000301455"
PH_hs_0001462	-0.747546	-0.191124	-0.0405556	-1.08019	NOM1	106.679	nucleolar protein with MIF4G domain 1	1	64434	NM_138400.1	61097911	NP_612409.1	ENSG00000146909	ENST00000275820	ENSP00000275820
PH_hs_0061025	0.42418	0.223472	0.371469	1.07733	PABPC5	707.982	"poly(A) binding protein, cytoplasmic 5"	1	140886	NM_080832.2	211904087	NP_543022.1	ENSG00000174740	ENST00000373105	ENSP00000362197
PH_hs_0045561	0.670491	0.0794383	0.336118	1.07303	DBNDD2	2133.56	dysbindin (dystrobrevin binding protein 1) domain containing 2	1	55861	"NM_018478.3,NM_001048226.2,NM_001048225.2"	308199489;308199479;308199477	"NP_060948.3,NP_001041691.2,NP_001041690.2"	ENSG00000244274	"ENST00000443296,ENST00000372710,ENST00000372720"	"ENSP00000414161,ENSP00000361795,ENSP00000361805"
PH_hs_0002190	0.388733	0.4596	0.060526	1.07279	RGS5	311056	regulator of G-protein signaling 5	1	8490	"NM_001254748.1,NM_001254749.1,NM_003617.3,NM_001195303.2"	363001420;363001550;295842286;363001422	"NP_001241677.1,NP_001241678.1,NP_003608.1,NP_001182232.1"	NA	NA	NA
PH_hs_0028869	-0.317029	-0.374831	-0.298294	-1.07033	FLRT3	204.601	fibronectin leucine rich transmembrane protein 3	1	23767	"NM_013281.3,NM_198391.2"	301129219;301129216	"NP_037413.1,NP_938205.1"	ENSG00000125848	ENST00000341420	ENSP00000339912
PH_hs_0040486	-0.480684	-0.143329	-0.387154	-1.06071	KIAA1841	91.0098	KIAA1841	1	84542	NM_001129993.1	194018432	NP_001123465.1	NA	NA	NA
PH_hs_0004132	0.462933	0.0900121	0.462028	1.07031	EFCAB4A	663.545	EF-hand calcium binding domain 4A	1	283229	NM_173584.3	150170652	NP_775855.3	ENSG00000177685	"ENST00000450448,ENST00000525077,ENST00000528542"	"ENSP00000409256,ENSP00000435299,ENSP00000432334"
PH_hs_0043362	0.651392	0.067914	0.324355	1.06997	TCF23	797.781	transcription factor 23	1	150921	NM_175769.2	295821226	NP_786951.1	ENSG00000163792	ENST00000296096	ENSP00000296096
PH_hs_0040690	-0.522804	-0.0915604	-0.285183	-1.00857	TMEM67	70.1976	transmembrane protein 67	1	91147	"NM_001142301.1,NM_153704.5,NR_024522.1"	214830752;214830731;215490109	"NP_001135773.1,NP_714915.3,-"	ENSG00000164953	"ENST00000520680,ENST00000453906,ENST00000452276"	"ENSP00000428785,ENSP00000403035,ENSP00000388671"
PH_hs_0043217	-0.606278	-0.125297	-0.278298	-1.06959	FGD4	143.957	"FYVE, RhoGEF and PH domain containing 4"	1	121512	NM_139241.2	198041927	NP_640334.2	ENSG00000139132	ENST00000427716	ENSP00000394487
PH_hs_0025332	-0.550679	-0.0587871	-0.389736	-1.0691	FBXW8	122.926	F-box and WD repeat domain containing 8	1	26259	"NM_012174.1,NM_153348.2"	30795120;30795122	"NP_036306.1,NP_699179.2"	ENSG00000174989	ENST00000455858	ENSP00000389144
PH_hs_0040833	-0.635066	-0.210811	-0.153856	-1.13086	ZNF175	64.7738	zinc finger protein 175	1	7728	NM_007147.2	37594438	NP_009078.1	ENSG00000105497	ENST00000600460	ENSP00000469914
PH_hs_0040926	-0.0566015	-0.319367	-0.516716	-1.02898	DMTF1	116.332	cyclin D binding myb-like transcription factor 1	1	9988	"NR_024550.1,NR_024549.1"	215598858;215598846	-	ENSG00000135164	"ENST00000411766,ENST00000584619"	"ENSP00000396570,ENSP00000464092"
PH_hs_0009299	0.708675	0.175543	0.181633	1.06891	ACHE	2425.62	acetylcholinesterase	1	43	NM_015831.2	88999566	NP_056646.1	ENSG00000087085	ENST00000302913	ENSP00000303211
PH_hs_0006578	0.606933	0.187166	0.275573	1.06771	LINC00837	1517.95	long intergenic non-protein coding RNA 837	1	100507605	"NR_038376.1,NR_038375.1,NR_038374.1"	335353778;335353777;335353776	-	NA	NA	NA
PH_hs_0040972	-0.416713	-0.154696	-0.429025	-1.12436	KIAA1598	59.285	KIAA1598	1	57698	"NM_001258300.1,NM_001258299.1,NM_001258298.1,NM_018330.6,NM_001127211.2"	385198096;385198094;385198092;385198091;385198090	"NP_001245229.1,NP_001245228.1,NP_001245227.1,NP_060800.2,NP_001120683.1"	NA	NA	NA
PH_hs_0001941	0.603399	0.195822	0.285662	1.06646	MIR4500HG	9068.92	MIR4500 host gene (non-protein coding)	1	642345	NR_033829.1	299782501	-	NA	NA	NA
PH_hs_0060427	0.487334	0.281412	0.266469	1.06603	LOC100653052	805.183	putative killer cell immunoglobulin-like receptor like protein KIR3DP1-like	1	100653052	XM_003403405.2	397140272	XP_003403453.2	NA	NA	NA
PH_hs_0041081	-0.514218	-0.068265	-0.391985	-1.07285	DHFRL1	86.202	dihydrofolate reductase-like 1	1	200895	"NM_176815.4,NM_001195643.1"	307548864;307548862	"NP_789785.1,NP_001182572.1"	ENSG00000178700	ENST00000496983	ENSP00000420810
PH_hs_0061219	0.614635	0.0735669	0.370223	1.0638	MACC1	1358.14	metastasis associated in colon cancer 1	1	346389	NM_182762.3	157502190	NP_877439.3	NA	NA	NA
PH_hs_0047486	-0.899444	-0.109935	-0.0575662	-1.06363	ZNF470	223.87	zinc finger protein 470	1	388566	NM_001001668.3	154091002	NP_001001668.3	ENSG00000197016	"ENST00000391709,ENST00000330619"	"ENSP00000375590,ENSP00000333223"
PH_hs_0041157	-0.208621	-0.250505	-0.455126	-1.01745	PGAP1	60.9173	post-GPI attachment to proteins 1	1	80055	NM_024989.3	62865856	NP_079265.2	NA	NA	NA
PH_hs_0042021	0.322294	0.183886	0.365403	1.02534	C1orf68	404.802	chromosome 1 open reading frame 68	1	100129271	NM_001024679.2	194354005	NP_001019850.1	ENSG00000198854	"ENST00000368775,ENST00000362017"	"ENSP00000357764,ENSP00000354769"
PH_hs_0000953	0.655674	0.232032	0.164759	1.06303	VGLL1	1016.92	vestigial like 1 (Drosophila)	1	51442	NM_016267.3	253970475	NP_057351.1	ENSG00000102243	"ENST00000456412,ENST00000370634"	"ENSP00000388868,ENSP00000359668"
PH_hs_0031733	-0.597004	-0.0498417	-0.36233	-1.06246	ZNF880	213.652	zinc finger protein 880	1	400713	NM_001145434.1	224177532	NP_001138906.1	ENSG00000221923	ENST00000422689	ENSP00000406318
PH_hs_0044969	-0.206404	-0.214278	-0.531777	-1.0578	GUSBP2	153.532	"glucuronidase, beta pseudogene 2"	1	387036	NR_003504.3	300360484	-	NA	NA	NA
PH_hs_0024613	-0.723802	-0.257906	-0.0433802	-1.05619	ANKRD11	1033.01	ankyrin repeat domain 11	1	29123	"NM_001256183.1,NM_013275.5,NM_001256182.1"	371874366;371874333;371874305	"NP_001243112.1,NP_037407.4,NP_001243111.1"	NA	NA	NA
PH_hs_0048874	0.707772	0.0423262	0.306439	1.05607	ABCG2	1374.07	"ATP-binding cassette, sub-family G (WHITE), member 2"	1	9429	"NM_004827.2,NM_001257386.1"	62526032;383792175	"NP_004818.2,NP_001244315.1"	ENSG00000118777	"ENST00000237612,ENST00000515655"	"ENSP00000237612,ENSP00000426917"
PH_hs_0042691	0.669648	0.0223408	0.536953	1.25778	SPEM1	91.4854	spermatid maturation 1	1	374768	NM_199339.2	116268094	NP_955371.2	ENSG00000181323	ENST00000323675	ENSP00000315554
PH_hs_0005610	0.603476	0.193684	0.261108	1.05478	BEAN1	1670.95	"brain expressed, associated with NEDD4, 1"	1	146227	"NM_001136106.4,NM_001178020.2"	363000014;362999962	"NP_001129578.1,NP_001171491.1"	ENSG00000166546	ENST00000562849	ENSP00000456822
PH_hs_0024793	-0.738274	-0.129378	-0.140728	-1.0539	THAP9	144.471	THAP domain containing 9	1	79725	NM_024672.4	198442881	NP_078948.3	ENSG00000168152	ENST00000505901	ENSP00000425966
PH_hs_0035574	-0.804347	-0.0676033	-0.133927	-1.05368	DNAJC21	117.54	"DnaJ (Hsp40) homolog, subfamily C, member 21"	1	134218	"NM_194283.3,NM_001012339.2"	68077167;68077165	"NP_919259.3,NP_001012339.2"	NA	NA	NA
PH_hs_0043738	0.608086	0.111381	0.335964	1.05273	IL9R	2939.48	interleukin 9 receptor	1	3581	"NM_176786.1,NM_002186.2"	29171683;29171681	"NP_789743.2,NP_002177.2"	ENSG00000124334	"ENST00000424344,ENST00000540897,ENST00000369423"	"ENSP00000388918,ENSP00000438112,ENSP00000358431"
PH_hs_0036111	-0.70357	-0.0460876	-0.255936	-1.05269	ZNF114	154.497	zinc finger protein 114	1	163071	NM_153608.1	23957699	NP_705836.1	ENSG00000178150	"ENST00000315849,ENST00000600687,ENST00000595607,ENST00000597695"	"ENSP00000318898,ENSP00000471727,ENSP00000469998,ENSP00000472747"
PH_hs_0040738	-0.366806	-0.15088	-0.454336	-1.05139	ZNF83	140.279	zinc finger protein 83	1	55769	"NM_018300.3,NM_001242531.1,NM_001105553.1,NM_001105551.1,NM_001242538.1,NM_001105554.1,NM_001105552.1,NM_001105550.1,NM_001105549.1"	157738650;335892862;157738660;157738656;335892883;157738662;157738658;157738654;157738652	"NP_060770.3,NP_001229460.1,NP_001099023.1,NP_001099021.1,NP_001229467.1,NP_001099024.1,NP_001099022.1,NP_001099020.1,NP_001099019.1"	NA	NA	NA
PH_hs_0042348	0.645535	0.131395	0.276526	1.05114	NPVF	1635.5	neuropeptide VF precursor	1	64111	NM_022150.3	93204874	NP_071433.3	ENSG00000105954	ENST00000222674	ENSP00000222674
PH_hs_0002992	-0.496794	-0.21164	-0.281103	-1.0511	CDK6	172.609	cyclin-dependent kinase 6	1	1021	"NM_001145306.1,NM_001259.6"	223718133;223718130	"NP_001138778.1,NP_001250.1"	ENSG00000105810	ENST00000424848	ENSP00000397087
PH_hs_0006562	0.654957	0.0749538	0.30358	1.05071	STX11	1431.24	syntaxin 11	1	8676	NM_003764.3	187423911	NP_003755.2	ENSG00000135604	ENST00000367568	ENSP00000356540
PH_hs_0043537	0.162841	0.303013	0.387613	1.02638	C20orf173	238.458	chromosome 20 open reading frame 173	1	140873	NR_026933.1	223972619	-	NA	NA	NA
PH_hs_0024920	0.677278	0.0698924	0.314054	1.0494	PADI1	2233.92	"peptidyl arginine deiminase, type I"	1	29943	NM_013358.2	122056684	NP_037490.2	ENSG00000142623	"ENST00000536552,ENST00000413717"	"ENSP00000444833,ENSP00000396697"
PH_hs_0035621	0.518815	0.330386	0.194476	1.0483	SCIMP	2367.92	SLP adaptor and CSK interacting membrane protein	1	388325	"NM_001271842.1,NM_207103.3"	427197600;427197599	"NP_001258771.1,NP_996986.1"	ENSG00000161929	ENST00000399600	ENSP00000382509
PH_hs_0045582	0.576281	0.250924	0.17293	1.04606	PARP9	500.298	"poly (ADP-ribose) polymerase family, member 9"	1	83666	NM_001146106.1	226371717	NP_001139578.1	ENSG00000138496	ENST00000462315	ENSP00000418894
PH_hs_0020650	0.610517	0.0666903	0.377571	1.04579	GGT5	4107.34	gamma-glutamyltransferase 5	1	2687	"NM_001099782.1,NM_001099781.1,NM_004121.2"	153266906;153266900;153266884	"NP_001093252.1,NP_001093251.1,NP_004112.2"	ENSG00000099998	"ENST00000398292,ENST00000425408,ENST00000327365,ENST00000263112"	"ENSP00000381340,ENSP00000402917,ENSP00000330080,ENSP00000263112"
PH_hs_0060519	0.728917	0.0117262	0.3066	1.045	TRIM16L	1550.52	tripartite motif containing 16-like	1	147166	NM_001037330.1	82617563	NP_001032407.1	ENSG00000108448|ENSG00000221926	"ENST00000424146,ENST00000414850,ENST00000571542|ENST00000580110,ENST00000579219"	"ENSP00000399959,ENSP00000403648,ENSP00000460537|ENSP00000464072,ENSP00000463639"
PH_hs_0045383	0.343103	0.323782	0.335627	1.04388	MSH5	859.965	mutS homolog 5 (E. coli)	1	4439	"NM_025259.5,NM_172165.3,NM_172166.3,NM_002441.4"	262231785;262231787;262231784;262231783	"NP_079535.4,NP_751897.1,NP_751898.1,NP_002432.1"	ENSG00000266442|ENSG00000227314|ENSG00000255419|ENSG00000237333|ENSG00000255152|ENSG00000204410|ENSG00000266027|ENSG00000230293|ENSG00000235222|ENSG00000254405|ENSG00000264619|ENSG00000233345	"ENST00000465533,ENST00000482009|ENST00000547775,ENST00000447504,ENST00000497253,ENST00000436004,ENST00000448617,ENST00000436192,ENST00000441401,ENST00000441395|ENST00000490634,ENST00000480622|ENST00000412630,ENST00000492052,ENST00000444225,ENST00000426512,ENST00000414514,ENST00000437726,ENST00000448169|ENST00000476085,ENST00000498473|ENST00000431848,ENST00000375742,ENST00000429846,ENST0000048430…	"ENSP00000463617,ENSP00000437010|ENSP00000448368,ENSP00000406211,ENSP00000431494,ENSP00000398373,ENSP00000387609,ENSP00000406868,ENSP00000406269,ENSP00000402659|ENSP00000463789,ENSP00000454400|ENSP00000406310,ENSP00000433922,ENSP00000389840,ENSP00000409866,ENSP00000408136,ENSP00000412179,ENSP00000400820|ENSP00000435414,ENSP00000419220|ENSP00000416784,ENSP00000364894,ENSP00000406849,ENSP0000042023…
PH_hs_0044472	-0.459802	-0.335807	-0.124624	-1.04645	NAA16	91.0611	"N(alpha)-acetyltransferase 16, NatA auxiliary subunit"	1	79612	"NM_018527.3,NM_001110798.1"	325120978;160707984	"NP_060997.2,NP_001104268.1"	ENSG00000172766	ENST00000403412	ENSP00000386103
PH_hs_0044646	0.668906	0.0908587	0.30021	1.1842	TACSTD2	183.111	tumor-associated calcium signal transducer 2	1	4070	NM_002353.2	166795235	NP_002344.2	ENSG00000184292	ENST00000371225	ENSP00000360269
PH_hs_0044677	-0.81022	-0.0777469	-0.143946	-1.07218	FOXP1	142.582	forkhead box P1	1	27086	NM_001012505.1	60498986	NP_001012523.1	ENSG00000114861	ENST00000318779	ENSP00000318721
PH_hs_0023916	0.640746	0.331795	0.0700129	1.04361	CCDC27	1821.14	coiled-coil domain containing 27	1	148870	NM_152492.2	217035163	NP_689705.2	ENSG00000162592	"ENST00000462521,ENST00000294600"	"ENSP00000463275,ENSP00000294600"
PH_hs_0035609	-0.0824289	-0.387424	-0.457161	-1.04235	ETV1	175.128	ets variant 1	1	2115	"NM_001163150.1,NM_001163152.1,NM_001163151.1,NM_001163149.1,NM_001163148.1,NM_001163147.1,NM_004956.4"	253683432;253683436;253683434;253683430;253683428;253683426;253683425	"NP_001156622.1,NP_001156624.1,NP_001156623.1,NP_001156621.1,NP_001156620.1,NP_001156619.1,NP_004947.2"	NA	NA	NA
PH_hs_0043272	-0.509629	-0.104355	-0.368121	-1.04194	DDTL	166.245	D-dopachrome tautomerase-like	1	100037417	NM_001084393.1	145386558	NP_001077862.1	ENSG00000099974	ENST00000215770	ENSP00000215770
PH_hs_0010921	-0.487845	-0.198316	-0.280863	-1.04146	KATNAL1	155.435	katanin p60 subunit A-like 1	1	84056	"NM_032116.4,NM_001014380.2"	387849031;387762674	"NP_115492.1,NP_001014402.1"	ENSG00000102781	ENST00000380617	ENSP00000369991
PH_hs_0045148	-0.361893	-0.018543	-0.681374	-1.12049	KIAA0825	47.6778	KIAA0825	1	285600	NM_173665.2	197100792	NP_775936.1	ENSG00000185261	ENST00000329378	ENSP00000331385
PH_hs_0023265	-0.765717	-0.0321016	-0.174523	-1.04129	ZCCHC2	97.3849	"zinc finger, CCHC domain containing 2"	1	54877	NM_017742.4	170016068	NP_060212.4	ENSG00000141664	"ENST00000586834,ENST00000269499"	"ENSP00000464791,ENSP00000269499"
PH_hs_0061673	0.605779	0.0420563	0.345656	1.0408	IPCEF1	661.143	interaction protein for cytohesin exchange factors 1	1	26034	"NM_001130700.1,NM_001130699.1,NM_015553.2"	194733752;194733746;195947410	"NP_001124172.1,NP_001124171.1,NP_056368.1"	ENSG00000074706	ENST00000422970	ENSP00000394751
PH_hs_0043701	-0.317122	-0.362386	-0.254864	-1.04006	PPP1R37	192.032	"protein phosphatase 1, regulatory subunit 37"	1	284352	NM_019121.1	338797735	NP_061994.1	ENSG00000104866	"ENST00000421905,ENST00000221462"	"ENSP00000390861,ENSP00000221462"
PH_hs_0042652	-0.612305	-0.0633954	-0.306209	-1.04	MBOAT4	131.628	membrane bound O-acyltransferase domain containing 4	1	619373	NM_001100916.1	189571628	NP_001094386.1	NA	NA	NA
PH_hs_0042913	0.432213	0.0381124	0.507871	1.03974	OR6C65	542.172	"olfactory receptor, family 6, subfamily C, member 65"	1	403282	NM_001005518.1	53933281	NP_001005518.1	ENSG00000205328	ENST00000379665	ENSP00000368986
PH_hs_0000089	0.450779	0.26046	0.302182	1.03867	GATA1	920.961	GATA binding protein 1 (globin transcription factor 1)	1	2623	NM_002049.3	183227689	NP_002040.1	ENSG00000267841|ENSG00000102145	"ENST00000599393,ENST00000596219,ENST00000596667|ENST00000447551,ENST00000376665,ENST00000376670"	"ENSP00000469331,ENSP00000472899,ENSP00000469059|ENSP00000404985,ENSP00000365853,ENSP00000365858"
PH_hs_0045585	-0.768482	-0.000478212	-0.247947	-1.08898	RPAIN	66.7277	RPA interacting protein	1	84268	"NR_027679.1,NM_001160243.1"	237858710;237858697	"-,NP_001153715.1"	NA	NA	NA
PH_hs_0038333	0.71713	0.111403	0.213783	1.0385	CD3D	6555.39	"CD3d molecule, delta (CD3-TCR complex)"	1	915	"NM_001040651.1,NM_000732.4"	98985800;98985799	"NP_001035741.1,NP_000723.1"	ENSG00000167286	ENST00000300692	ENSP00000300692
PH_hs_0005132	-0.570267	-0.115422	-0.302984	-1.03756	NF1	168.315	neurofibromin 1	1	4763	"NM_001042492.2,NM_000267.3"	270132520;270132515	"NP_001035957.1,NP_000258.1"	ENSG00000196712	"ENST00000456735,ENST00000579081"	"ENSP00000389907,ENSP00000462408"
PH_hs_0040357	0.625751	0.147483	0.259544	1.03731	SERPINC1	2153.43	"serpin peptidase inhibitor, clade C (antithrombin), member 1"	1	462	NM_000488.3	254588059	NP_000479.1	NA	NA	NA
PH_hs_0042860	0.722304	0.0311661	0.285822	1.03724	OR5B21	1543.72	"olfactory receptor, family 5, subfamily B, member 21"	1	219968	NM_001005218.1	57634529	NP_001005218.1	ENSG00000198283	ENST00000360374	ENSP00000353537
PH_hs_0046229	-0.651954	-0.150947	-0.21857	-1.08053	H2AFV	130.28	"H2A histone family, member V"	1	94239	"NM_012412.4,NM_201516.2,NM_201517.2,NM_201436.2"	149999596;149999600;149999598;149999599	"NP_036544.1,NP_958924.1,NP_958925.1,NP_958844.1"	NA	NA	NA
PH_hs_0013302	0.668726	0.135581	0.231146	1.03703	SLC22A7	2691.67	"solute carrier family 22 (organic anion transporter), member 7"	1	10864	"NM_153320.2,NM_006672.3"	90669190;90669131	"NP_696961.2,NP_006663.2"	ENSG00000137204	"ENST00000372585,ENST00000372589"	"ENSP00000361666,ENSP00000361670"
PH_hs_0030111	0.800905	0.00381296	0.260107	1.03576	ADAMTSL4	4557.63	ADAMTS-like 4	1	54507	NM_019032.4	83281433	NP_061905.2	ENSG00000143382	"ENST00000271643,ENST00000369038"	"ENSP00000271643,ENSP00000358034"
PH_hs_0006991	0.659616	0.183985	0.214678	1.03489	DEFB126	4735.09	"defensin, beta 126"	1	81623	NM_030931.2	30061484	NP_112193.1	ENSG00000125788	ENST00000382398	ENSP00000371835
PH_hs_0031081	-0.640094	-0.270911	-0.0247608	-1.03253	LIN28B	140.344	lin-28 homolog B (C. elegans)	1	389421	NM_001004317.3	392513692	NP_001004317.1	NA	NA	NA
PH_hs_0043498	0.479646	0.183908	0.341179	1.03113	SIRPB1	868.013	signal-regulatory protein beta 1	1	10326	"NM_006065.3,NM_001083910.2"	223941791;223941789	"NP_006056.2,NP_001077379.1"	ENSG00000101307	"ENST00000381603,ENST00000381605,ENST00000262929"	"ENSP00000371016,ENSP00000371018,ENSP00000262929"
PH_hs_0047196	0.802538	0.132525	0.0877892	1.12038	KRT19P2	199.858	keratin 19 pseudogene 2	1	160313	NR_036685.1	308736978	-	NA	NA	NA
PH_hs_0047329	-0.8321	-0.173267	-0.030686	-1.01416	INTS8	164.547	integrator complex subunit 8	1	55656	"NM_017864.3,NR_073445.1,NR_073444.1"	422398947;422399075;422399074	"NP_060334.2,-"	ENSG00000164941	"ENST00000447247,ENST00000523206,ENST00000343161"	"ENSP00000398203,ENSP00000429452,ENSP00000343274"
PH_hs_0047396	-0.4199	-0.156031	-0.403189	-1.09897	ZNF507	81.9861	zinc finger protein 507	1	22847	"NM_001136156.1,NM_014910.4"	209954810;209954809	"NP_001129628.1,NP_055725.2"	ENSG00000168813	ENST00000311921	ENSP00000312277
PH_hs_0025182	-0.634201	-0.279537	-0.0458921	-1.0296	SMC5	110.522	structural maintenance of chromosomes 5	1	23137	NM_015110.3	155722984	NP_055925.2	NA	NA	NA
PH_hs_0047700	0.267061	0.578923	0.133947	1.08576	LGI2	44.8889	"leucine-rich repeat LGI family, member 2"	1	55203	NM_018176.3	195539333	NP_060646.2	ENSG00000153012	ENST00000382114	ENSP00000371548
PH_hs_0003518	0.633447	0.28035	0.100545	1.02858	KLK5	1233.8	kallikrein-related peptidase 5	1	25818	"NM_001077492.1,NM_001077491.1,NM_012427.4"	117306175;117306171;117306170	"NP_001070960.1,NP_001070959.1,NP_036559.1"	ENSG00000167754	"ENST00000593428,ENST00000336334,ENST00000391809"	"ENSP00000471966,ENSP00000337733,ENSP00000375685"
PH_hs_0048705	0.56192	0.0663056	0.357621	1.14984	GLI3	200.358	GLI family zinc finger 3	1	2737	NM_000168.5	195947346	NP_000159.3	ENSG00000106571	ENST00000395925	ENSP00000379258
PH_hs_0017505	-0.25442	-0.0465588	-0.624936	-1.02743	MAN1A2	154.986	"mannosidase, alpha, class 1A, member 2"	1	10905	NM_006699.3	46852167	NP_006690.1	NA	NA	NA
PH_hs_0028471	0.404254	0.191624	0.355107	1.02472	FMOD	634.044	fibromodulin	1	2331	NM_002023.3	71040110	NP_002014.2	NA	NA	NA
PH_hs_0029550	-0.489881	-0.238768	-0.209645	-1.02399	KRR1	104.017	"KRR1, small subunit (SSU) processome component, homolog (yeast)"	1	11103	NM_007043.6	117676402	NP_008974.5	ENSG00000111615	ENST00000229214	ENSP00000229214
PH_hs_0030563	0.714475	0.0202013	0.28297	1.02245	MUC4	931.911	"mucin 4, cell surface associated"	1	4585	NM_018406.6	336285427	NP_060876.5	NA	NA	NA
PH_hs_0049347	0.177758	0.158527	0.815401	1.26553	GRIA1	102.822	"glutamate receptor, ionotropic, AMPA 1"	1	2890	"NM_001258023.1,NM_001258022.1,NM_001258021.1,NM_001258020.1,NM_001258019.1,NM_001114183.1,NM_000827.3,NR_047578.1"	384381491;384381489;384381487;384381485;384381483;167001483;167001418;384381493	"NP_001244952.1,NP_001244951.1,NP_001244950.1,NP_001244949.1,NP_001244948.1,NP_001107655.1,NP_000818.2,-"	NA	NA	NA
PH_hs_0049446	0.249604	0.26412	0.355813	1.02785	OVOL1	166.063	ovo-like 1(Drosophila)	1	5017	NM_004561.3	342349332	NP_004552.2	ENSG00000172818	ENST00000335987	ENSP00000337862
PH_hs_0049540	-0.608534	-0.13037	-0.193003	-1.00239	ASAH2B|ASAH2	57.9607	N-acylsphingosine amidohydrolase (non-lysosomal ceramidase) 2B|N-acylsphingosine amidohydrolase (non-lysosomal ceramidase) 2	4	653308|56624	"NM_001079516.1|NM_019893.2,NM_001143974.1"	118442844|221218980;221307474	"NP_001072984.1|NP_063946.2,NP_001137446.1"	ENSG00000072444|ENSG00000204147|ENSG00000188611	"ENST00000426610|ENST00000185907,ENST00000374006|ENST00000443575,ENST00000447815"	"ENSP00000399947|ENSP00000185907,ENSP00000363118|ENSP00000392766,ENSP00000388206"
PH_hs_0060025	0.322553	0.145066	0.42209	1.00354	NANOG	129.585	Nanog homeobox	1	79923	NM_024865.2	153945815	NP_079141.2	ENSG00000176654|ENSG00000111704	"ENST00000530989|ENST00000229307,ENST00000526286"	"ENSP00000432545|ENSP00000229307,ENSP00000435288"
PH_hs_0006308	0.468096	0.429728	0.112536	1.02229	CRLF1	1431.07	cytokine receptor-like factor 1	1	9244	NM_004750.4	260655997	NP_004741.1	ENSG00000006016	ENST00000392386	ENSP00000376188
PH_hs_0013181	0.614604	0.149838	0.269763	1.02114	KRT38	5006.57	keratin 38	1	8687	NM_006771.3	15431317	NP_006762.3	ENSG00000171360	ENST00000246646	ENSP00000246646
PH_hs_0007533	0.493216	0.278344	0.231979	1.02111	DAPK2	3219.61	death-associated protein kinase 2	1	23604	NM_014326.3	71774012	NP_055141.2	ENSG00000035664	"ENST00000261891,ENST00000559007"	"ENSP00000261891,ENSP00000453639"
PH_hs_0060100	0.789304	0.112541	0.583257	1.51246	GOLGA3	64.011	golgin A3	1	2802	NM_001172557.1	289191385	NP_001166028.1	ENSG00000090615	"ENST00000545875,ENST00000537452"	"ENSP00000442603,ENSP00000442143"
PH_hs_0024300	-0.575146	-0.241124	-0.171207	-1.02102	HOOK1	213.676	hook homolog 1 (Drosophila)	1	51361	NM_015888.4	95007031	NP_056972.1	ENSG00000134709	ENST00000395561	ENSP00000378928
PH_hs_0061429	0.658488	0.213769	0.144454	1.01917	CHST5	1411.87	carbohydrate (N-acetylglucosamine 6-O) sulfotransferase 5	1	23563	NM_024533.4	345091043	NP_078809.2	ENSG00000183196|ENSG00000135702|ENSG00000260092	ENST00000390664|ENST00000336257|ENST00000460606	ENSP00000375079|ENSP00000338783|ENSP00000457544
PH_hs_0061080	0.555547	0.1812	0.293875	1.01917	S100A3	1901.7	S100 calcium binding protein A3	1	6274	NM_002960.1	4506762	NP_002951.1	ENSG00000188015	"ENST00000368712,ENST00000368713"	"ENSP00000357701,ENSP00000357702"
PH_hs_0035551	-0.338299	-0.191508	-0.413542	-1.01745	TMEM249	145.973	transmembrane protein 249	1	340393	"NM_001252402.1,NM_001252404.1,NR_047684.1"	357394955;357394960;386268033	"NP_001239331.1,NP_001239333.1,-"	ENSG00000214597|ENSG00000261587	"ENST00000526263,ENST00000531225,ENST00000398633|ENST00000562477,ENST00000562628,ENST00000565365"	"ENSP00000435362,ENSP00000436572,ENSP00000381630|ENSP00000457580,ENSP00000454248,ENSP00000454468"
PH_hs_0060526	-0.653276	-0.196613	-0.177148	-1.01596	SYNJ2BP	397.013	synaptojanin 2 binding protein	1	55333	NM_018373.2	157388992	NP_060843.2	ENSG00000213463	ENST00000256366	ENSP00000256366
PH_hs_0031788	-0.407006	-0.0900074	-0.456759	-1.01586	FAM102B	194.099	"family with sequence similarity 102, member B"	1	284611	NM_001010883.2	162809335	NP_001010883.2	NA	NA	NA
PH_hs_0023746	-0.672331	-0.295901	-0.0188083	-1.01503	HEATR3	223.511	HEAT repeat containing 3	1	55027	NM_182922.2	90819240	NP_891552.1	ENSG00000155393	ENST00000285767	ENSP00000285767
PH_hs_0033336	-0.377562	-0.22033	-0.342874	-1.01494	ZNF33B|ZNF33A	163.031	zinc finger protein 33B|zinc finger protein 33A	4	7582|7581	"NM_006955.1|NM_006974.2,NM_006954.1"	24307874|110347444;110347445	"NP_008886.1|NP_008905.1,NP_008885.1"	ENSG00000196693|ENSG00000189180	"ENST00000359467|ENST00000374618,ENST00000458705"	"ENSP00000352444|ENSP00000363747,ENSP00000387713"
PH_hs_0060960	0.342355	0.462517	0.206816	1.01034	ERBB4	753.93	v-erb-a erythroblastic leukemia viral oncogene homolog 4 (avian)	1	2066	"NM_001042599.1,NM_005235.2"	110825957;110825959	"NP_001036064.1,NP_005226.1"	ENSG00000178568	ENST00000402597	ENSP00000385565
PH_hs_0060961	0.61619	0.0627784	0.404286	1.16674	MAF	599.209	v-maf musculoaponeurotic fibrosarcoma oncogene homolog (avian)	1	4094	NM_001031804.2	197313769	NP_001026974.1	ENSG00000178573	ENST00000393350	ENSP00000377019
PH_hs_0036686	0.563143	0.158112	0.290199	1.01476	VCY1B|VCY	1498.17	"variable charge, Y-linked 1B|variable charge, Y-linked"	4	353513|9084	NM_181880.1|NM_004679.2	49355827|49355825	NP_870996.1|NP_004670.1	ENSG00000129862|ENSG00000129864	ENST00000250823|ENST00000250825	ENSP00000250823|ENSP00000250825
PH_hs_0045072	-0.230014	-0.263125	-0.37878	-1.0129	DNMT3A	95.8416	DNA (cytosine-5-)-methyltransferase 3 alpha	1	1788	NM_175630.1	28559070	NP_783329.1	ENSG00000119772	ENST00000406659	ENSP00000384852
PH_hs_0001780	-0.524442	-0.0792977	-0.396586	-1.01191	MRE11A	375.164	MRE11 meiotic recombination 11 homolog A (S. cerevisiae)	1	4361	"NM_005590.3,NM_005591.3"	56550106;56550105	"NP_005581.2,NP_005582.1"	NA	NA	NA
PH_hs_0027688	-0.388551	-0.160041	-0.397304	-1.01086	WASF1	222.662	"WAS protein family, member 1"	1	8936	"NM_001024936.1,NM_001024935.1,NM_001024934.1,NM_003931.2"	68161503;68161501;68161499;68161486	"NP_001020107.1,NP_001020106.1,NP_001020105.1,NP_003922.1"	ENSG00000112290	"ENST00000368938,ENST00000265601,ENST00000444391"	"ENSP00000357934,ENSP00000265601,ENSP00000407041"
PH_hs_0010594	0.662784	0.101544	0.200523	1.01044	BRDT	444.123	"bromodomain, testis-specific"	1	676	"NM_001242810.1,NM_001242808.1,NM_001242807.1,NM_001242806.1,NM_001242805.1,NM_207189.2,NM_001726.3"	338797767;338797760;338797762;338797756;338797754;168229154;168229153	"NP_001229739.1,NP_001229737.1,NP_001229736.1,NP_001229735.1,NP_001229734.1,NP_997072.1,NP_001717.2"	ENSG00000137948	"ENST00000394530,ENST00000399546,ENST00000402388,ENST00000370389,ENST00000362005"	"ENSP00000378038,ENSP00000387822,ENSP00000384051,ENSP00000359416,ENSP00000354568"
PH_hs_0022144	0.686261	0.207252	0.107764	1.00998	NME9	2364.15	NME/NM23 family member 9	1	347736	NM_178130.2	31342394	NP_835231.1	ENSG00000181322	"ENST00000317876,ENST00000492993,ENST00000383180"	"ENSP00000321929,ENSP00000419355,ENSP00000372667"
PH_hs_0045632	0.726519	0.0756404	0.206892	1.00961	MYO7A	2526.2	myosin VIIA	1	4647	NM_001127179.2	256355178	NP_001120651.2	ENSG00000261910|ENSG00000137474	ENST00000576665|ENST00000409893	ENSP00000459383|ENSP00000386689
PH_hs_0061391	0.227265	0.0753755	0.676946	1.05349	CCBE1	534.155	collagen and calcium binding EGF domains 1	1	147372	NM_133459.3	290562712	NP_597716.1	ENSG00000183287	ENST00000398179	ENSP00000381241
PH_hs_0061204	0.686139	0.0996488	0.227444	1.0075	GRIA1	3747.74	"glutamate receptor, ionotropic, AMPA 1"	1	2890	"NM_001258023.1,NM_001258022.1,NM_001258021.1,NM_001258020.1,NM_001258019.1,NM_001114183.1,NM_000827.3,NR_047578.1"	384381491;384381489;384381487;384381485;384381483;167001483;167001418;384381493	"NP_001244952.1,NP_001244951.1,NP_001244950.1,NP_001244949.1,NP_001244948.1,NP_001107655.1,NP_000818.2,-"	ENSG00000155511	"ENST00000518783,ENST00000285900"	"ENSP00000428994,ENSP00000285900"
PH_hs_0029833	-0.446426	-0.310313	-0.175747	-1.0071	SOCS4	170.796	suppressor of cytokine signaling 4	1	122809	"NM_199421.1,NM_080867.2"	40807479;40807478	"NP_955453.1,NP_543143.1"	NA	NA	NA
PH_hs_0042620	0.39395	0.241053	0.350054	1.00702	OR4D11	1304.14	"olfactory receptor, family 4, subfamily D, member 11"	1	219986	NM_001004706.1	52317240	NP_001004706.1	ENSG00000176200	ENST00000313253	ENSP00000320077
PH_hs_0027873	-0.61576	-0.0650018	-0.294441	-1.00609	PRKX	194.099	"protein kinase, X-linked"	1	5613	NM_005044.4	290648026	NP_005035.1	NA	NA	NA
PH_hs_0040664	-0.391972	-0.109119	-0.456317	-1.00521	GNPTAB	282.717	"N-acetylglucosamine-1-phosphate transferase, alpha and beta subunits"	1	79158	NM_024312.4	296010928	NP_077288.2	ENSG00000111670	"ENST00000550718,ENST00000549738"	"ENSP00000449557,ENSP00000450161"
PH_hs_0005436	0.466446	0.298461	0.234361	1.00507	ILDR1	1584.18	immunoglobulin-like domain containing receptor 1	1	286676	"NM_001199799.1,NM_001199800.1,NM_175924.3"	315259077;315259079;315259076	"NP_001186728.1,NP_001186729.1,NP_787120.1"	ENSG00000145103	ENST00000273691	ENSP00000273691
PH_hs_0032091	0.579633	0.257075	0.164779	1.00448	UTS2R	1278.19	urotensin 2 receptor	1	2837	NM_018949.1	9506744	NP_061822.1	ENSG00000181408	ENST00000313135	ENSP00000323516
PH_hs_0040978	-0.40455	-0.174851	-0.357698	-1.00433	SPG20	244.453	spastic paraplegia 20 (Troyer syndrome)	1	23111	"NM_015087.4,NM_001142296.1,NM_001142295.1,NM_001142294.1"	214830219;214830186;214830108;214830078	"NP_055902.1,NP_001135768.1,NP_001135767.1,NP_001135766.1"	NA	NA	NA
PH_hs_0038690	0.902451	0.00141929	0.109064	1.00345	RPL35	80724.2	ribosomal protein L35	1	11224	NM_007209.3	78190471	NP_009140.1	ENSG00000136942	"ENST00000348462,ENST00000493018,ENST00000373570"	"ENSP00000259469,ENSP00000437215,ENSP00000362671"
PH_hs_0002618	-0.24687	-0.253324	-0.447491	-1.00316	LONRF2	137.887	LON peptidase N-terminal domain and ring finger 2	1	164832	NM_198461.3	148528974	NP_940863.3	ENSG00000170500	ENST00000409647	ENSP00000386823
PH_hs_0025063	-0.294837	-0.33154	-0.218711	-1.00173	RERG	86.8044	"RAS-like, estrogen-regulated, growth inhibitor"	1	85004	"NM_001190726.1,NM_032918.2"	299758438;299758437	"NP_001177655.1,NP_116307.1"	ENSG00000134533	"ENST00000536465,ENST00000538313,ENST00000256953"	"ENSP00000438280,ENSP00000441505,ENSP00000256953"
PH_hs_0036396	0.623402	0.0216698	0.324124	1.00123	LCE2A	769.615	late cornified envelope 2A	1	353139	NM_178428.3	57242769	NP_848515.1	ENSG00000187173	ENST00000368779	ENSP00000357768
