# Supplementary material for: Profiling transcriptomes of human SH-SY5Y neuroblastoma cells exposed to maleic acid
Source: PeerJ. 2017 Apr 5;5:e3175. doi: 10.7717/peerj.3175 (PMC5384566; doi:10.7717/peerj.3175)
Supplement: Supplemental Information 5 [file peerj-05-3175-s005.xlsx]

## Sheet: ChemDIS_protein
Gene Symbol	Gene ID	Gene name
TMEM185A	84548	transmembrane protein 185A
ZDBF2	57683	zinc finger, DBF-type containing 2
EXOC3L2	90332	exocyst complex component 3-like 2
IGF1	3479	insulin-like growth factor 1 (somatomedin C)
INHBB	3625	inhibin, beta B
FCGR1B	2210|2209	Fc fragment of IgG receptor Ib
FAM92A1P2	403315|137392	family with sequence similarity 92 member A1 pseudogene 2
EOGT	285203	EGF domain-specific O-linked N-acetylglucosamine (GlcNAc) transferase
PIK3R1	5295	phosphoinositide-3-kinase, regulatory subunit 1 (alpha)
BANK1	55024	B-cell scaffold protein with ankyrin repeats 1
NOP10	55505	NOP10 ribonucleoprotein
FAM86B3P	286042	family with sequence similarity 86, member A pseudogene
PBLD	64081	phenazine biosynthesis-like protein domain containing
ZNF121	7675	zinc finger protein 121
BTNL10	100129094	butyrophilin-like 10
OR10A4	283297	olfactory receptor, family 10, subfamily A, member 4
TNF	7124	tumor necrosis factor
CLDN25	644672	claudin 25
FOXN3	1112	forkhead box N3
PIK3C2A	5286	phosphatidylinositol-4-phosphate 3-kinase, catalytic subunit type 2 alpha
CHM	1121	choroideremia (Rab escort protein 1)
PDCL	5082	phosducin-like
CNOT6L	246175	CCR4-NOT transcription complex, subunit 6-like
SP4	6671	Sp4 transcription factor
CR1	1378	complement component (3b/4b) receptor 1 (Knops blood group)
RSPH6A	81492	radial spoke head 6 homolog A (Chlamydomonas)
HIST1H2BG	8339	histone cluster 1, H2bg
PCDHAC1	56135	protocadherin alpha subfamily C, 1
CSAD	51380	cysteine sulfinic acid decarboxylase
ERCC6L2	375748	excision repair cross-complementation group 6-like 2
GTF2I	2969	general transcription factor IIi
OR11G2	390439	olfactory receptor, family 11, subfamily G, member 2
MREG	55686	melanoregulin
DBT	1629	dihydrolipoamide branched chain transacylase E2
MPP5	64398	membrane protein, palmitoylated 5 (MAGUK p55 subfamily member 5)
ZNF800	168850	zinc finger protein 800
ZNF326	284695	zinc finger protein 326
NR1D2	9975	nuclear receptor subfamily 1, group D, member 2
FBXO40	51725	F-box protein 40
FAM153A	285596|202134	family with sequence similarity 153 member A
KCTD12	115207	potassium channel tetramerization domain containing 12
ARFIP1	27236	ADP-ribosylation factor interacting protein 1
RABL3	285282	RAB, member of RAS oncogene family-like 3
GIGYF2	26058	GRB10 interacting GYF protein 2
TRIM52	84851	tripartite motif containing 52
HEATR1	55127	HEAT repeat containing 1
LOC101060541	101060541	RNA-binding protein 8A-like
STX17	55014	syntaxin 17
LPAR4	2846	lysophosphatidic acid receptor 4
FAM71F2	346653	family with sequence similarity 71, member F2
PDPK1	5170	3-phosphoinositide dependent protein kinase 1
POLK	51426	polymerase (DNA directed) kappa
PKD1L1	168507	polycystic kidney disease 1 like 1
VWA7	80737	von Willebrand factor A domain containing 7
SUV39H2	79723	suppressor of variegation 3-9 homolog 2 (Drosophila)
MAP2	4133	microtubule-associated protein 2
KIAA1377	57562	KIAA1377
ZNF528	84436	zinc finger protein 528
SCRN3	79634	secernin 3
CLEC4G	339390	C-type lectin domain family 4, member G
KIAA0825	285600	KIAA0825
TCEANC2	127428	transcription elongation factor A (SII) N-terminal and central domain containing 2
KIF1B	23095	kinesin family member 1B
FAM200A	221786	family with sequence similarity 200, member A
PEG3	5178	paternally expressed 3
SMAD1	4086	SMAD family member 1
PRSS36	146547	protease, serine, 36
ADAMTS8	11095	ADAM metallopeptidase with thrombospondin type 1 motif, 8
SGOL1	151648	shugoshin-like 1 (S. pombe)
SPANXD	64648|728695|100133171|171489|64663|171490|728712|30014	SPANX family member D
GTPBP10	85865	GTP-binding protein 10 (putative)
PHF6	84295	PHD finger protein 6
HDAC9	9734	histone deacetylase 9
SOX6	55553	SRY (sex determining region Y)-box 6
MYLK3	91807	myosin light chain kinase 3
FAM115C	285966	family with sequence similarity 115, member C
RAD18	56852	RAD18 E3 ubiquitin protein ligase
AKT2	208	v-akt murine thymoma viral oncogene homolog 2
ZNF850	342892	zinc finger protein 850
ZNF396	252884	zinc finger protein 396
TCIRG1	10312	T-cell, immune regulator 1, ATPase, H+ transporting, lysosomal V0 subunit A3
ZNF208	7757	zinc finger protein 208
REST	5978	RE1-silencing transcription factor
KCNC1	3746	potassium voltage-gated channel, Shaw-related subfamily, member 1
CEP19	84984	centrosomal protein 19kDa
EPS8L3	79574	EPS8-like 3
SIKE1	80143	suppressor of IKBKE 1
CDH23	64072	cadherin-related 23
SOX17	64321	SRY (sex determining region Y)-box 17
GAB3	139716	GRB2-associated binding protein 3
ANKK1	255239	ankyrin repeat and kinase domain containing 1
PRKCE	5581	protein kinase C, epsilon
ZNF773	374928	zinc finger protein 773
SETD7	80854	SET domain containing (lysine methyltransferase) 7
INTS6	26512	integrator complex subunit 6
ADM2	79924	adrenomedullin 2
ZNF277	11179	zinc finger protein 277
GNRHR	2798	gonadotropin-releasing hormone receptor
B4GALNT4	338707	beta-1,4-N-acetyl-galactosaminyl transferase 4
TMX4	56255	thioredoxin-related transmembrane protein 4
WDR17	116966	WD repeat domain 17
MSH3	4437	mutS homolog 3
BOD1L1	259282	biorientation of chromosomes in cell division 1-like 1
CCND2	894	cyclin D2
LOC100652741	100652741	protein capicua homolog
N4BP2	55728	NEDD4 binding protein 2
LOC541473	541473	FK506 binding protein 6, 36kDa pseudogene
CD68	968	CD68 molecule
ZNF655	79027	zinc finger protein 655
ZNF271	10778	zinc finger protein 271
SKAP1	8631	src kinase associated phosphoprotein 1
NFAT5	10725	nuclear factor of activated T-cells 5, tonicity-responsive
ZNF268	10795	zinc finger protein 268
SLC25A48	153328	solute carrier family 25, member 48
FAM91A1	157769	family with sequence similarity 91, member A1
TRAPPC3L	100128327	trafficking protein particle complex 3-like
SLC16A7	9194	solute carrier family 16 (monocarboxylate transporter), member 7
ACBD4	79777	acyl-CoA binding domain containing 4
CARF	79800	calcium responsive transcription factor
ADAMTS5	11096	ADAM metallopeptidase with thrombospondin type 1 motif, 5
ZGRF1	55345	zinc finger, GRF-type containing 1
NEK2	4751	NIMA-related kinase 2
LIMS1	3987	LIM and senescent cell antigen-like domains 1
SDCCAG8	10806	serologically defined colon cancer antigen 8
RNF183	138065	ring finger protein 183
DNAJB3	414061|100286922	DnaJ heat shock protein family (Hsp40) member B3
TNFRSF10B	8795	tumor necrosis factor receptor superfamily, member 10b
FAM111B	374393	family with sequence similarity 111, member B
SPIN4	139886	spindlin family, member 4
ABCA7	10347	ATP-binding cassette, sub-family A (ABC1), member 7
BRWD1	54014	bromodomain and WD repeat domain containing 1
FIGNL1	63979	fidgetin-like 1
PRELID2	153768	PRELI domain containing 2
CD55	1604	CD55 molecule, decay accelerating factor for complement (Cromer blood group)
TRIM14	9830	tripartite motif containing 14
CCDC88A	55704	coiled-coil domain containing 88A
CDH8	1006	cadherin 8, type 2
DLX1	1745	distal-less homeobox 1
ZNF345	25850	zinc finger protein 345
FRMPD4	9758	FERM and PDZ domain containing 4
FMO1	2326	flavin containing monooxygenase 1
ZNF765	91661	zinc finger protein 765
ZNF268	10795	zinc finger protein 268
FAM177A1	283635	family with sequence similarity 177, member A1
APOC4	346	apolipoprotein C-IV
RAB27A	5873	RAB27A, member RAS oncogene family
GPALPP1	55425	GPALPP motifs containing 1
ZFP62	643836	ZFP62 zinc finger protein
SCAF1	58506	SR-related CTD-associated factor 1
TBXA2R	6915	thromboxane A2 receptor
ZNF566	84924	zinc finger protein 566
STAU2-AS1	100128126	STAU2 antisense RNA 1
ZBTB33	10009	zinc finger and BTB domain containing 33
ZNF836	162962	zinc finger protein 836
USP45	85015	ubiquitin specific peptidase 45
ELAC1	55520	elaC ribonuclease Z 1
BNC2	54796	basonuclin 2
FIP1L1	81608	factor interacting with PAPOLA and CPSF1
GINS4	84296	GINS complex subunit 4 (Sld5 homolog)
ALPI	248	alkaline phosphatase, intestinal
LGALS16	148003|56891|29124	galectin 16
FCGR1A	2209|2210	Fc fragment of IgG receptor Ia
PNPT1	87178	polyribonucleotide nucleotidyltransferase 1
ZNF671	79891	zinc finger protein 671
MUC7	4589	mucin 7, secreted
GXYLT1	283464	glucoside xylosyltransferase 1
SPATA1	100505741	spermatogenesis associated 1
AGAP1	116987	ArfGAP with GTPase domain, ankyrin repeat and PH domain 1
CACYBP	27101	calcyclin binding protein
WDR37	22884	WD repeat domain 37
ZGRF1	55345	zinc finger, GRF-type containing 1
LZTFL1	54585	leucine zipper transcription factor-like 1
NIPAL1	152519	NIPA-like domain containing 1
ACTR2	10097	ARP2 actin-related protein 2 homolog (yeast)
RAMP2-AS1	100190938	RAMP2 antisense RNA 1
ZNF33A	7581	zinc finger protein 33A
RUFY2	55680	RUN and FYVE domain containing 2
NEGR1	257194	neuronal growth regulator 1
KRTAP5-7	440050	keratin associated protein 5-7
ZNF426	79088	zinc finger protein 426
IL1RL1	9173	interleukin 1 receptor-like 1
TEAD1	7003	TEA domain family member 1 (SV40 transcriptional enhancer factor)
CARF	79800	calcium responsive transcription factor
ZNF354B	117608	zinc finger protein 354B
GABRA4	2557	gamma-aminobutyric acid (GABA) A receptor, alpha 4
ITGAV	3685	integrin, alpha V
OR5AN1	390195	olfactory receptor, family 5, subfamily AN, member 1
ARSH	347527	arylsulfatase family, member H
KRTAP5-2	440021|440051|387273	keratin associated protein 5-2
C17orf104	284071	chromosome 17 open reading frame 104
ITIH2	3698	inter-alpha-trypsin inhibitor heavy chain 2
ZNF326	284695	zinc finger protein 326
KIF27	55582	kinesin family member 27
TNFAIP8L1	126282	tumor necrosis factor, alpha-induced protein 8-like 1
NXPH2	11249	neurexophilin 2
ANGPTL4	51129	angiopoietin-like 4
NOM1	64434	nucleolar protein with MIF4G domain 1
PABPC5	140886	poly(A) binding protein, cytoplasmic 5
DBNDD2	55861	dysbindin (dystrobrevin binding protein 1) domain containing 2
RGS5	8490	regulator of G-protein signaling 5
FLRT3	23767	fibronectin leucine rich transmembrane protein 3
KIAA1841	84542	KIAA1841
CRACR2B	283229	calcium release activated channel regulator 2B
TCF23	150921	transcription factor 23
TMEM67	91147	transmembrane protein 67
FGD4	121512	FYVE, RhoGEF and PH domain containing 4
FBXW8	26259	F-box and WD repeat domain containing 8
ZNF175	7728	zinc finger protein 175
DMTF1	9988	cyclin D binding myb-like transcription factor 1
ACHE	43	acetylcholinesterase (Yt blood group)
LINC00837	100507605	long intergenic non-protein coding RNA 837
KIAA1598	57698	KIAA1598
MIR4500HG	642345	MIR4500 host gene (non-protein coding)
LOC100653052	100653052	killer cell immunoglobulin-like receptor 2DL5A-like
DHFRL1	200895	dihydrofolate reductase-like 1
MACC1	346389	metastasis associated in colon cancer 1
ZNF470	388566	zinc finger protein 470
PGAP1	80055	post-GPI attachment to proteins 1
C1orf68	100129271	chromosome 1 open reading frame 68
VGLL1	51442	vestigial-like family member 1
ZNF880	400713	zinc finger protein 880
GUSBP2	387036	glucuronidase, beta pseudogene 2
ANKRD11	29123	ankyrin repeat domain 11
ABCG2	9429	ATP-binding cassette, sub-family G (WHITE), member 2 (Junior blood group)
SPEM1	374768	spermatid maturation 1
BEAN1	146227	brain expressed, associated with NEDD4, 1
THAP9	79725	THAP domain containing 9
DNAJC21	134218	DnaJ (Hsp40) homolog, subfamily C, member 21
IL9R	3581	interleukin 9 receptor
ZNF114	163071	zinc finger protein 114
ZNF83	55769	zinc finger protein 83
NPVF	64111	neuropeptide VF precursor
CDK6	1021	cyclin-dependent kinase 6
STX11	8676	syntaxin 11
C20orf173	140873	chromosome 20 open reading frame 173
PADI1	29943	peptidyl arginine deiminase, type I
SCIMP	388325	SLP adaptor and CSK interacting membrane protein
PARP9	83666	poly (ADP-ribose) polymerase family, member 9
GGT5	2687	gamma-glutamyltransferase 5
TRIM16L	147166	tripartite motif containing 16-like
MSH5	4439	mutS homolog 5
NAA16	79612	N(alpha)-acetyltransferase 16, NatA auxiliary subunit
TACSTD2	4070	tumor-associated calcium signal transducer 2
FOXP1	27086	forkhead box P1
CCDC27	148870	coiled-coil domain containing 27
ETV1	2115	ets variant 1
DDTL	100037417	D-dopachrome tautomerase-like
KATNAL1	84056	katanin p60 subunit A-like 1
KIAA0825	285600	KIAA0825
ZCCHC2	54877	zinc finger, CCHC domain containing 2
IPCEF1	26034	interaction protein for cytohesin exchange factors 1
PPP1R37	284352	protein phosphatase 1, regulatory subunit 37
MBOAT4	619373	membrane bound O-acyltransferase domain containing 4
OR6C65	403282	olfactory receptor, family 6, subfamily C, member 65
GATA1	2623	GATA binding protein 1 (globin transcription factor 1)
RPAIN	84268	RPA interacting protein
CD3D	915	CD3d molecule, delta (CD3-TCR complex)
NF1	4763	neurofibromin 1
SERPINC1	462	serpin peptidase inhibitor, clade C (antithrombin), member 1
OR5B21	219968	olfactory receptor, family 5, subfamily B, member 21
H2AFV	94239	H2A histone family, member V
SLC22A7	10864	solute carrier family 22 (organic anion transporter), member 7
ADAMTSL4	54507	ADAMTS-like 4
DEFB126	81623	defensin, beta 126
LIN28B	389421	lin-28 homolog B (C. elegans)
SIRPB1	10326	signal-regulatory protein beta 1
KRT19P2	160313	keratin 19 pseudogene 2
INTS8	55656	integrator complex subunit 8
ZNF507	22847	zinc finger protein 507
SMC5	23137	structural maintenance of chromosomes 5
LGI2	55203	leucine-rich repeat LGI family, member 2
KLK5	25818	kallikrein-related peptidase 5
GLI3	2737	GLI family zinc finger 3
MAN1A2	10905	mannosidase, alpha, class 1A, member 2
FMOD	2331	fibromodulin
KRR1	11103	KRR1, small subunit (SSU) processome component, homolog (yeast)
MUC4	4585	mucin 4, cell surface associated
GRIA1	2890	glutamate receptor, ionotropic, AMPA 1
OVOL1	5017	ovo-like zinc finger 1
ASAH2B	653308|56624	N-acylsphingosine amidohydrolase 2B
NANOG	79923	Nanog homeobox
CRLF1	9244	cytokine receptor-like factor 1
KRT38	8687	keratin 38
DAPK2	23604	death-associated protein kinase 2
GOLGA3	2802	golgin A3
HOOK1	51361	hook microtubule-tethering protein 1
CHST5	23563	carbohydrate (N-acetylglucosamine 6-O) sulfotransferase 5
S100A3	6274	S100 calcium binding protein A3
TMEM249	340393	transmembrane protein 249
SYNJ2BP	55333	synaptojanin 2 binding protein
FAM102B	284611	family with sequence similarity 102, member B
HEATR3	55027	HEAT repeat containing 3
ZNF33B	7582|7581	zinc finger protein 33B
ERBB4	2066	v-erb-b2 avian erythroblastic leukemia viral oncogene homolog 4
MAF	4094	v-maf avian musculoaponeurotic fibrosarcoma oncogene homolog
VCY1B	353513|9084	variable charge, Y-linked 1B
DNMT3A	1788	DNA (cytosine-5-)-methyltransferase 3 alpha
MRE11A	4361	MRE11 meiotic recombination 11 homolog A (S. cerevisiae)
WASF1	8936	WAS protein family, member 1
BRDT	676	bromodomain, testis-specific
NME9	347736	NME/NM23 family member 9
MYO7A	4647	myosin VIIA
CCBE1	147372	collagen and calcium binding EGF domains 1
GRIA1	2890	glutamate receptor, ionotropic, AMPA 1
SOCS4	122809	suppressor of cytokine signaling 4
OR4D11	219986	olfactory receptor, family 4, subfamily D, member 11
PRKX	5613	protein kinase, X-linked
GNPTAB	79158	N-acetylglucosamine-1-phosphate transferase, alpha and beta subunits
ILDR1	286676	immunoglobulin-like domain containing receptor 1
UTS2R	2837	urotensin 2 receptor
SPG20	23111	spastic paraplegia 20 (Troyer syndrome)
RPL35	11224	ribosomal protein L35
LONRF2	164832	LON peptidase N-terminal domain and ring finger 2
RERG	85004	RAS-like, estrogen-regulated, growth inhibitor
LCE2A	353139	late cornified envelope 2A
SEMA5A	9037	sema domain, seven thrombospondin repeats (type 1 and type 1-like), transmembrane domain (TM) and short cytoplasmic domain, (semaphorin) 5A

## Sheet: ChemDIS_go
Type	ID	Description	GeneRatio	Bg Ratio	P	Adj. P	Q	Genes
BP	GO:0006725	cellular aromatic compound metabolic process	120/ 248	6267/ 18229	3.28462e-06	0.000182423	0.00012819315747016	ZBTB33/ABCA7/NFAT5/ZNF268/KRR1/FOXN3/ZNF277/CHM/RPL35/AGAP1/ZNF354B/FGD4/TCEANC2/ZNF836/ZNF114/LONRF2/ZNF800/DLX1/DNMT3A/DHFRL1/ERBB4/AKT2/ETV1/ZNF507/KIF1B/SMC5/FMO1/CNOT6L/ZNF396/ZNF345/IPCEF1/GATA1/INTS6/FOXP1/CACYBP/GLI3/ZNF326/GTF2I/ZNF850/MACC1/NME9/IGF1/ZNF773/ERCC6L2/ZNF470/LIN28B/LIMS1/ZNF880/SMAD1/MAF/ACHE/MRE11A/MSH3/MSH5/MYO7A/NF1/OVOL1/POLK/VGLL1/PDPK1/PEG3/PIK3R1/BRWD1/BNC2/HEATR1/N…
BP	GO:0071704	organic substance metabolic process	174/ 248	10337/ 18229	7.91727e-06	0.00033529	0.00023561740575224	ZBTB33/CDK6/ABCA7/NFAT5/ZNF268/MAN1A2/ADAMTS8/ADAMTS5/KRR1/FOXN3/ZNF277/CHM/RPL35/AGAP1/ZNF354B/FGD4/SOCS4/TCEANC2/DNAJC21/CR1/PRSS36/CCBE1/CD55/DBT/ZNF836/ZNF114/LONRF2/ZNF800/DLX1/DNMT3A/DHFRL1/ERBB4/AKT2/ETV1/ZNF507/KIF1B/SMC5/FMO1/FMOD/CHST5/DAPK2/CNOT6L/ZNF396/ANKK1/KLK5/ZNF345/IPCEF1/GIGYF2/GATA1/FBXW8/INTS6/GGT5/FOXP1/CACYBP/GLI3/GXYLT1/ZNF326/EOGT/GRIA1/GTF2I/PADI1/ZNF850/APOC4/MACC1/ARSH…
BP	GO:0044237	cellular metabolic process	166/ 248	9816/ 18229	1.68496e-05	0.000579306	0.00040709328464365	ZBTB33/CDK6/ABCA7/NFAT5/ZNF268/MAN1A2/KRR1/FOXN3/ZNF277/CHM/RPL35/AGAP1/ZNF354B/FGD4/SOCS4/TCEANC2/DNAJC21/DBT/ZNF836/ZNF114/LONRF2/ZNF800/DLX1/DNMT3A/DHFRL1/ERBB4/AKT2/ETV1/ZNF507/KIF1B/SMC5/FMO1/FMOD/CHST5/DAPK2/CNOT6L/ALPI/ZNF396/ANKK1/ZNF345/IPCEF1/GIGYF2/GATA1/FBXW8/INTS6/GGT5/FOXP1/CACYBP/GLI3/GXYLT1/PPP1R37/ZNF326/EOGT/GRIA1/GTF2I/PADI1/ZNF850/MACC1/ARSH/NME9/IGF1/INHBB/ITGAV/ZNF773/ERCC6L…
BP	GO:0050794	regulation of cellular process	158/ 248	9385/ 18229	6.13228e-05	0.00134167	0.00094282525423016	ZBTB33/ACTR2/CDK6/TCIRG1/SIRPB1/ABCA7/NFAT5/ZNF268/ADAMTS8/FOXN3/ZNF277/CHM/NXPH2/KCTD12/AGAP1/ZNF354B/FGD4/SOCS4/TNFAIP8L1/CR1/CCBE1/CD55/ZNF836/ZNF114/ZNF800/DLX1/DNMT3A/ERBB4/AKT2/ETV1/OR5B21/OR4D11/ZNF507/SPG20/SMC5/FMOD/DAPK2/FLRT3/CNOT6L/ZNF396/GABRA4/NEGR1/KLK5/ZNF345/IPCEF1/GIGYF2/GATA1/FBXW8/INTS6/FOXP1/CACYBP/ARFIP1/GLI3/GNRHR/OR10A4/UTS2R/PPP1R37/LPAR4/ZNF326/RABL3/ILDR1/GRIA1/GTF2I/ZN…
BP	GO:0008152	metabolic process	181/ 248	11207/ 18229	8.32771e-05	0.00176841	0.0012427102172127	DDTL/ZBTB33/CDK6/ABCA7/NFAT5/ZNF268/MAN1A2/ADAMTS8/ADAMTS5/KRR1/FOXN3/ZNF277/CHM/RPL35/AGAP1/ZNF354B/FGD4/SOCS4/TCEANC2/DNAJC21/CR1/PRSS36/CCBE1/CD55/DBT/ZNF836/ZNF114/LONRF2/ZNF800/DLX1/DNMT3A/DHFRL1/ERBB4/AKT2/ETV1/ZNF507/KIF1B/SMC5/FMO1/FMOD/CHST5/DAPK2/CNOT6L/ALPI/ZNF396/ANKK1/KLK5/ZNF345/IPCEF1/GIGYF2/GATA1/FBXW8/INTS6/GGT5/FOXP1/CACYBP/GLI3/GXYLT1/PPP1R37/ZNF326/EOGT/GRIA1/GTF2I/PADI1/B4GAL…
BP	GO:0050789	regulation of biological process	163/ 248	9882/ 18229	0.000137917	0.00269125	0.0018912102403071	ZBTB33/ACTR2/CDK6/TCIRG1/SIRPB1/ABCA7/NFAT5/ZNF268/ADAMTS8/FOXN3/ZNF277/CHM/NXPH2/KCTD12/AGAP1/ZNF354B/FGD4/SOCS4/TNFAIP8L1/CR1/CCBE1/CD55/ZNF836/ZNF114/ZNF800/DLX1/DNMT3A/ERBB4/AKT2/ETV1/OR5B21/OR4D11/ZNF507/SPG20/SMC5/FMOD/DAPK2/FLRT3/CNOT6L/ZNF396/GABRA4/NEGR1/KLK5/ZNF345/IPCEF1/GIGYF2/GATA1/FBXW8/INTS6/FOXP1/CACYBP/ARFIP1/GLI3/GNRHR/CRACR2B/OR10A4/UTS2R/PPP1R37/LPAR4/ZNF326/RABL3/ILDR1/GRIA1/…
BP	GO:0065007	biological regulation	168/ 248	10361/ 18229	0.000259441	0.00416259	0.0029251616765646	ZBTB33/ACTR2/CDK6/TCIRG1/SIRPB1/ABCA7/NFAT5/ZNF268/ADAMTS8/FOXN3/ZNF277/CHM/NXPH2/KCTD12/AGAP1/ZNF354B/FGD4/SOCS4/TNFAIP8L1/CR1/CCBE1/SGOL1/CD55/ZNF836/ZNF114/ZNF800/DLX1/DNMT3A/ERBB4/AKT2/ETV1/OR5B21/OR4D11/ZNF507/SPG20/SMC5/FMOD/DAPK2/FLRT3/CNOT6L/ZNF396/GABRA4/NEGR1/KLK5/ZNF345/IPCEF1/GIGYF2/GATA1/FBXW8/INTS6/FOXP1/CACYBP/ARFIP1/GLI3/GNRHR/CRACR2B/OR10A4/UTS2R/PPP1R37/LPAR4/ZNF326/RABL3/ILDR1/…
BP	GO:0048519	negative regulation of biological process	68/ 248	3685/ 18229	0.00370445	0.0293914	0.020654102651996	ZBTB33/CDK6/ABCA7/ZNF268/ADAMTS8/FOXN3/SOCS4/TNFAIP8L1/CR1/CD55/DLX1/DNMT3A/ERBB4/AKT2/SPG20/CNOT6L/ZNF345/GIGYF2/GATA1/FOXP1/CACYBP/GLI3/UTS2R/GTF2I/IGF1/INHBB/ITGAV/LIN28B/LIMS1/TACSTD2/SMAD1/MAF/ACHE/MRE11A/MSH3/SERPINC1/NEK2/NF1/OVOL1/PDCL/ANGPTL4/PDPK1/PIK3R1/SYNJ2BP/SOX6/PRKCE/DBNDD2/RAD18/REST/FIGNL1/PBLD/NPVF/SOX17/TNF/ZNF655/NAA16/SUV39H2/NANOG/RGS5/RERG/PNPT1/SEMA5A/TMEM67/IL1RL1/CRLF1/…
BP	GO:0044767	single-organism developmental process	89/ 248	5109/ 18229	0.00403581	0.0309984	0.021783427077266	C1orf68/ACTR2/CDK6/ZNF268/SDCCAG8/MAN1A2/ZNF277/CHM/FGD4/GAB3/CCBE1/TCF23/PKD1L1/DLX1/DNMT3A/ERBB4/AKT2/ETV1/SPG20/SMC5/FLRT3/GABRA4/NEGR1/KLK5/GIGYF2/GATA1/FBXW8/CACYBP/GLI3/GNRHR/OR10A4/UTS2R/FAM115C/ANKRD11/GTF2I/IGF1/LCE2A/INHBB/ITGAV/SPEM1/LIMS1/TACSTD2/SMAD1/MAF/MAP2/ACHE/MSH3/MYO7A/NEK2/NF1/OVOL1/ANGPTL4/HOOK1/PDPK1/FBXO40/PEG3/PIK3R1/BRWD1/BNC2/SOX6/KIF27/CCDC88A/PRKX/PCDHAC1/KIAA1598/RAB…
BP	GO:0007166	cell surface receptor signaling pathway	61/ 248	3252/ 18229	0.00438386	0.032845	0.023081077406228	ZBTB33/ACTR2/CDK6/TCIRG1/SIRPB1/ABCA7/NXPH2/KCTD12/FGD4/SOCS4/CR1/CCBE1/CD55/DLX1/ERBB4/AKT2/OR5B21/OR4D11/SPG20/FMOD/GABRA4/KLK5/GIGYF2/GATA1/GLI3/GNRHR/OR10A4/UTS2R/LPAR4/GRIA1/IGF1/IL9R/INHBB/ITGAV/OR5AN1/OR11G2/LIMS1/OR6C65/TACSTD2/SMAD1/NF1/PDCL/PDPK1/PIK3C2A/PIK3R1/SYNJ2BP/KIF27/PRKCE/PBLD/NPVF/SOX17/TBXA2R/TNF/NANOG/ADM2/RGS5/SKAP1/TNFRSF10B/CD3D/IL1RL1/HDAC9
BP	GO:0009653	anatomical structure morphogenesis	46/ 248	2317/ 18229	0.00517838	0.0362989	0.025508222565377	ACTR2/SDCCAG8/FGD4/CCBE1/DLX1/ERBB4/ETV1/SPG20/FLRT3/GATA1/FBXW8/GLI3/OR10A4/UTS2R/ANKRD11/GTF2I/IGF1/ITGAV/SPEM1/LIMS1/TACSTD2/SMAD1/MAP2/ACHE/MYO7A/NF1/ANGPTL4/BRWD1/BNC2/SOX6/KIF27/PRKX/KIAA1598/PBLD/SOX17/MPP5/TBXA2R/TNF/NANOG/ADM2/PNPT1/WASF1/SEMA5A/TMEM67/MYLK3/HDAC9
BP	GO:0032502	developmental process	89/ 248	5161/ 18229	0.00544973	0.0371198	0.026085094446609	C1orf68/ACTR2/CDK6/ZNF268/SDCCAG8/MAN1A2/ZNF277/CHM/FGD4/GAB3/CCBE1/TCF23/PKD1L1/DLX1/DNMT3A/ERBB4/AKT2/ETV1/SPG20/SMC5/FLRT3/GABRA4/NEGR1/KLK5/GIGYF2/GATA1/FBXW8/CACYBP/GLI3/GNRHR/OR10A4/UTS2R/FAM115C/ANKRD11/GTF2I/IGF1/LCE2A/INHBB/ITGAV/SPEM1/LIMS1/TACSTD2/SMAD1/MAF/MAP2/ACHE/MSH3/MYO7A/NEK2/NF1/OVOL1/ANGPTL4/HOOK1/PDPK1/FBXO40/PEG3/PIK3R1/BRWD1/BNC2/SOX6/KIF27/CCDC88A/PRKX/PCDHAC1/KIAA1598/RAB…
BP	GO:0048856	anatomical structure development	80/ 248	4564/ 18229	0.00601302	0.0398294	0.027989154698215	C1orf68/ACTR2/CDK6/SDCCAG8/MAN1A2/CHM/FGD4/GAB3/CCBE1/TCF23/DLX1/DNMT3A/ERBB4/AKT2/ETV1/SPG20/FLRT3/GABRA4/NEGR1/KLK5/GIGYF2/GATA1/FBXW8/CACYBP/GLI3/OR10A4/UTS2R/FAM115C/ANKRD11/GTF2I/IGF1/LCE2A/INHBB/ITGAV/SPEM1/LIMS1/TACSTD2/SMAD1/MAF/MAP2/ACHE/MSH3/MYO7A/NEK2/NF1/OVOL1/ANGPTL4/HOOK1/PDPK1/FBXO40/PEG3/PIK3R1/BRWD1/BNC2/SOX6/KIF27/CCDC88A/PRKX/PCDHAC1/KIAA1598/RAB27A/REST/PBLD/SOX17/MPP5/TBXA2R/…
BP	GO:0048869	cellular developmental process	63/ 248	3470/ 18229	0.00781761	0.0478332	0.03361361612767	ACTR2/CDK6/ZNF268/FGD4/GAB3/TCF23/DLX1/ERBB4/AKT2/ETV1/SPG20/FLRT3/NEGR1/GIGYF2/GATA1/FBXW8/CACYBP/GLI3/OR10A4/FAM115C/IGF1/LCE2A/INHBB/ITGAV/SPEM1/TACSTD2/SMAD1/MAF/MAP2/ACHE/MYO7A/NF1/OVOL1/ANGPTL4/HOOK1/PDPK1/FBXO40/PIK3R1/BRWD1/SOX6/KIF27/CCDC88A/PRKX/KIAA1598/RAB27A/REST/FIGNL1/PBLD/SOX17/MPP5/BRDT/TNF/GNPTAB/SUV39H2/NANOG/PNPT1/WASF1/SEMA5A/TMEM67/CD3D/MYLK3/HDAC9/NR1D2
BP	GO:0051239	regulation of multicellular organismal process	42/ 248	2123/ 18229	0.00808245	0.0486294	0.034173155259554	CDK6/ABCA7/CCBE1/DLX1/ERBB4/SPG20/NEGR1/GATA1/FBXW8/GLI3/UTS2R/GTF2I/IGF1/INHBB/LIMS1/TACSTD2/SMAD1/MAF/ACHE/MRE11A/SERPINC1/NF1/ANGPTL4/PDPK1/PIK3R1/SOX6/CCDC88A/PRKCE/PRKX/KIAA1598/REST/PBLD/NPVF/SOX17/SP4/TBXA2R/TNF/ADM2/SEMA5A/IL1RL1/HDAC9/NR1D2
BP	GO:0051716	cellular response to stimulus	103/ 248	6216/ 18229	0.00842415	0.0498544	0.035033984152622	ZBTB33/ACTR2/CDK6/TCIRG1/SIRPB1/ABCA7/NFAT5/ZNF268/FOXN3/ZNF277/NXPH2/KCTD12/AGAP1/FGD4/SOCS4/TNFAIP8L1/CR1/CCBE1/CD55/DLX1/DNMT3A/ERBB4/AKT2/OR5B21/OR4D11/SPG20/SMC5/FMO1/FMOD/DAPK2/FLRT3/GABRA4/KLK5/GIGYF2/GATA1/INTS6/CACYBP/GLI3/GNRHR/OR10A4/UTS2R/LPAR4/RABL3/GRIA1/GTF2I/IGF1/IL9R/INHBB/ITGAV/ERCC6L2/SCIMP/LIN28B/OR5AN1/OR11G2/LIMS1/OR6C65/TACSTD2/SMAD1/MAP2/MRE11A/MSH3/NF1/PDCL/POLK/PDPK1/PIK…
MF	GO:0003674	molecular_function	247/ 247	15711/ 18229	8.64522e-17	8.55877e-15	6.8251758958857e-15	DDTL/ZBTB33/C1orf68/CDH8/ACTR2/CDK6/TCIRG1/SIRPB1/ABCA7/NFAT5/ZNF268/SDCCAG8/SLC22A7/MAN1A2/ADAMTS8/ADAMTS5/KRR1/FOXN3/ZNF277/CHM/RPL35/NXPH2/KCTD12/AGAP1/ZNF354B/FGD4/TCEANC2/DNAJC21/CR1/RNF183/PABPC5/PRSS36/CCBE1/TCF23/SGOL1/NIPAL1/PRELID2/CD55/DBT/ZNF836/ZNF114/LONRF2/PKD1L1/ZNF800/DLX1/DNMT3A/DHFRL1/ERBB4/AKT2/ETV1/OR5B21/OR4D11/FAM200A/ZNF507/KIF1B/SPG20/SMC5/FMO1/CHST5/DAPK2/FLRT3/CNOT6L/AL…
MF	GO:0005488	binding	207/ 247	12580/ 18229	6.45049e-08	3.19299e-06	0.0000025462469845714	ZBTB33/CDH8/ACTR2/CDK6/SIRPB1/ABCA7/NFAT5/ZNF268/SDCCAG8/MAN1A2/ADAMTS8/ADAMTS5/KRR1/FOXN3/ZNF277/CHM/RPL35/KCTD12/AGAP1/ZNF354B/FGD4/TCEANC2/DNAJC21/CR1/RNF183/PABPC5/CCBE1/TCF23/SGOL1/CD55/ZNF836/ZNF114/LONRF2/PKD1L1/ZNF800/DLX1/DNMT3A/DHFRL1/ERBB4/AKT2/ETV1/FAM200A/ZNF507/KIF1B/SPG20/SMC5/FMO1/DAPK2/FLRT3/CNOT6L/ALPI/ZNF396/ANKK1/NEGR1/KLK5/ZNF345/BOD1L1/IPCEF1/GIGYF2/GATA1/FBXW8/INTS6/FOXP1/C…
MF	GO:0003677	DNA binding	62/ 247	2363/ 18229	1.54664e-07	5.10392e-06	0.0000040701088938501	ZBTB33/NFAT5/ZNF268/FOXN3/ZNF277/ZNF354B/TCEANC2/ZNF836/ZNF114/ZNF800/DLX1/DNMT3A/ERBB4/ETV1/ZNF507/ZNF396/ZNF345/BOD1L1/GATA1/FOXP1/GLI3/ZNF326/GTF2I/ZNF850/ZNF773/ERCC6L2/ZNF470/LIN28B/SMAD1/MAF/MRE11A/MSH3/MSH5/OVOL1/POLK/BNC2/SOX6/ZNF83/RAD18/REST/SOX17/SP4/TEAD1/TNF/ZNF33A/ZNF121/ZNF175/ZNF208/ZNF655/ZNF426/SUV39H2/THAP9/CARF/ZNF671/NANOG/PHF6/ZNF528/ZNF566/ZNF765/H2AFV/NR1D2/DMTF1
MF	GO:0043167	ion binding	115/ 247	5932/ 18229	2.74887e-06	6.80345e-05	0.000054253956385806	ZBTB33/CDH8/ACTR2/CDK6/ABCA7/ZNF268/MAN1A2/ADAMTS8/ADAMTS5/ZNF277/AGAP1/ZNF354B/FGD4/DNAJC21/RNF183/CCBE1/ZNF836/ZNF114/LONRF2/ZNF800/DNMT3A/ERBB4/AKT2/ZNF507/KIF1B/SMC5/FMO1/DAPK2/CNOT6L/ALPI/ZNF396/ANKK1/ZNF345/GATA1/FOXP1/GLI3/CRACR2B/ZNF326/RABL3/PADI1/ZNF850/ARSH/NME9/ITGAV/ZNF773/ERCC6L2/ZNF470/LIN28B/LIMS1/ZNF880/SMAD1/ACHE/MRE11A/MSH3/MSH5/SERPINC1/MYO7A/NEK2/NF1/OVOL1/CSAD/POLK/PDPK1/FBX…
MF	GO:0003700	sequence-specific DNA binding transcription factor activity	33/ 247	1045/ 18229	5.17297e-06	7.70179e-05	0.000061417784987536	NFAT5/ZNF268/FOXN3/ZNF354B/ZNF836/ETV1/ZNF396/ZNF345/GATA1/FOXP1/GLI3/GTF2I/ZNF470/ZNF880/SMAD1/MAF/OVOL1/PEG3/SOX6/ZNF83/REST/SOX17/SP4/TEAD1/ZNF33A/ZNF121/ZNF175/ZNF655/CARF/NANOG/ZNF528/NR1D2/DMTF1
MF	GO:0001071	nucleic acid binding transcription factor activity	33/ 247	1046/ 18229	5.2781e-06	7.70179e-05	0.000061417784987536	NFAT5/ZNF268/FOXN3/ZNF354B/ZNF836/ETV1/ZNF396/ZNF345/GATA1/FOXP1/GLI3/GTF2I/ZNF470/ZNF880/SMAD1/MAF/OVOL1/PEG3/SOX6/ZNF83/REST/SOX17/SP4/TEAD1/ZNF33A/ZNF121/ZNF175/ZNF655/CARF/NANOG/ZNF528/NR1D2/DMTF1
MF	GO:0003676	nucleic acid binding	82/ 247	3838/ 18229	5.44571e-06	7.70179e-05	0.000061417784987536	ZBTB33/NFAT5/ZNF268/KRR1/FOXN3/ZNF277/RPL35/KCTD12/ZNF354B/TCEANC2/DNAJC21/PABPC5/ZNF836/ZNF114/ZNF800/DLX1/DNMT3A/DHFRL1/ERBB4/ETV1/FAM200A/ZNF507/ZNF396/ZNF345/BOD1L1/GIGYF2/GATA1/FOXP1/GLI3/ZNF326/GTF2I/ZNF850/ZNF773/ERCC6L2/ZNF470/LIN28B/ZNF880/SMAD1/MAF/MRE11A/MSH3/MSH5/OVOL1/POLK/PEG3/BNC2/ZCCHC2/HEATR1/NOP10/SOX6/ZNF83/RAD18/ZDBF2/SCAF1/REST/SOX17/ZFP62/NOM1/SP4/TEAD1/TNF/ZNF33A/ZNF121/ZNF…
MF	GO:1901363	heterocyclic compound binding	109/ 247	5702/ 18229	1.32411e-05	0.000163859	0.00013066868787311	ZBTB33/ACTR2/CDK6/ABCA7/NFAT5/ZNF268/KRR1/FOXN3/ZNF277/RPL35/KCTD12/AGAP1/ZNF354B/TCEANC2/DNAJC21/PABPC5/ZNF836/ZNF114/ZNF800/DLX1/DNMT3A/DHFRL1/ERBB4/AKT2/ETV1/FAM200A/ZNF507/KIF1B/SMC5/FMO1/DAPK2/ZNF396/ANKK1/ZNF345/BOD1L1/GIGYF2/GATA1/FOXP1/GLI3/ZNF326/RABL3/GTF2I/ZNF850/NME9/ZNF773/ERCC6L2/ZNF470/LIN28B/ZNF880/SMAD1/MAF/MRE11A/MSH3/MSH5/MYO7A/NEK2/OVOL1/CSAD/POLK/PDPK1/PEG3/PIK3C2A/BNC2/ZCCHC…
MF	GO:0097159	organic cyclic compound binding	109/ 247	5771/ 18229	2.36248e-05	0.000259873	0.00020723538372054	ZBTB33/ACTR2/CDK6/ABCA7/NFAT5/ZNF268/KRR1/FOXN3/ZNF277/RPL35/KCTD12/AGAP1/ZNF354B/TCEANC2/DNAJC21/PABPC5/ZNF836/ZNF114/ZNF800/DLX1/DNMT3A/DHFRL1/ERBB4/AKT2/ETV1/FAM200A/ZNF507/KIF1B/SMC5/FMO1/DAPK2/ZNF396/ANKK1/ZNF345/BOD1L1/GIGYF2/GATA1/FOXP1/GLI3/ZNF326/RABL3/GTF2I/ZNF850/NME9/ZNF773/ERCC6L2/ZNF470/LIN28B/ZNF880/SMAD1/MAF/MRE11A/MSH3/MSH5/MYO7A/NEK2/OVOL1/CSAD/POLK/PDPK1/PEG3/PIK3C2A/BNC2/ZCCHC…
MF	GO:0043169	cation binding	83/ 247	4086/ 18229	3.32339e-05	0.000329016	0.0002623728947571	ZBTB33/CDH8/ZNF268/MAN1A2/ADAMTS8/ADAMTS5/ZNF277/AGAP1/ZNF354B/FGD4/DNAJC21/RNF183/CCBE1/ZNF836/ZNF114/LONRF2/ZNF800/DNMT3A/ZNF507/CNOT6L/ALPI/ZNF396/ZNF345/GATA1/FOXP1/GLI3/CRACR2B/ZNF326/PADI1/ZNF850/ARSH/ITGAV/ZNF773/ZNF470/LIN28B/LIMS1/ZNF880/SMAD1/ACHE/MRE11A/NEK2/NF1/OVOL1/POLK/FBXO40/PEG3/BNC2/ZCCHC2/ZGRF1/ELAC1/RUFY2/ZNF83/PRKCE/PCDHAC1/RAD18/ZDBF2/REST/S100A3/FIGNL1/CDH23/ZFP62/SP4/ZNF33…
MF	GO:0046872	metal ion binding	81/ 247	4016/ 18229	5.67455e-05	0.000510709	0.00040726405187243	ZBTB33/CDH8/ZNF268/MAN1A2/ADAMTS8/ADAMTS5/ZNF277/AGAP1/ZNF354B/FGD4/DNAJC21/RNF183/CCBE1/ZNF836/ZNF114/LONRF2/ZNF800/DNMT3A/ZNF507/CNOT6L/ALPI/ZNF396/ZNF345/GATA1/FOXP1/GLI3/CRACR2B/ZNF326/PADI1/ZNF850/ARSH/ITGAV/ZNF773/ZNF470/LIN28B/LIMS1/ZNF880/SMAD1/MRE11A/NEK2/OVOL1/POLK/FBXO40/PEG3/BNC2/ZCCHC2/ZGRF1/ELAC1/RUFY2/ZNF83/PRKCE/PCDHAC1/RAD18/ZDBF2/REST/S100A3/FIGNL1/CDH23/ZFP62/SP4/ZNF33A/ZNF121/…
MF	GO:0002020	protease binding	6/ 247	76/ 18229	0.000576702	0.00475779	0.0037940896378277	CCBE1/ALPI/ITGAV/SERPINC1/ADAMTSL4/TNF
MF	GO:0043565	sequence-specific DNA binding	21/ 247	750/ 18229	0.00138527	0.0105494	0.0084125719524763	ZBTB33/FOXN3/ZNF277/DLX1/DNMT3A/ETV1/GATA1/FOXP1/GLI3/SMAD1/MAF/MSH3/OVOL1/SOX6/REST/SOX17/SUV39H2/THAP9/CARF/NANOG/NR1D2
MF	GO:0044212	transcription regulatory region DNA binding	15/ 247	505/ 18229	0.00384367	0.0269793	0.021514610314158	ZNF277/ERBB4/ETV1/GATA1/GLI3/SMAD1/OVOL1/SOX6/REST/SOX17/TNF/SUV39H2/CARF/NANOG/NR1D2
MF	GO:0000975	regulatory region DNA binding	15/ 247	512/ 18229	0.00436029	0.0269793	0.021514610314158	ZNF277/ERBB4/ETV1/GATA1/GLI3/SMAD1/OVOL1/SOX6/REST/SOX17/TNF/SUV39H2/CARF/NANOG/NR1D2
MF	GO:0001067	regulatory region nucleic acid binding	15/ 247	512/ 18229	0.00436029	0.0269793	0.021514610314158	ZNF277/ERBB4/ETV1/GATA1/GLI3/SMAD1/OVOL1/SOX6/REST/SOX17/TNF/SUV39H2/CARF/NANOG/NR1D2
MF	GO:0032403	protein complex binding	20/ 247	787/ 18229	0.00534361	0.0311187	0.024815538088838	ACTR2/ADAMTS8/ADAMTS5/CCBE1/KIF1B/ZNF326/IGF1/MAP2/ACHE/MYO7A/PDCL/PDPK1/PIK3R1/KIF27/CCDC88A/ADM2/KATNAL1/RPAIN/SKAP1/WASF1
MF	GO:0000976	transcription regulatory region sequence-specific DNA binding	11/ 247	332/ 18229	0.00577911	0.0317851	0.025346990641131	ZNF277/ETV1/GATA1/GLI3/SMAD1/OVOL1/REST/SUV39H2/CARF/NANOG/NR1D2
CC	GO:0005575	cellular_component	255/ 255	17280/ 18229	1.08729e-06	0.000107642	0.000093850268987168	DDTL/ZBTB33/TRAPPC3L/BTNL10/C1orf68/CDH8/ACTR2/CDK6/TCIRG1/SIRPB1/ABCA7/NFAT5/ZNF268/SDCCAG8/SLC22A7/MAN1A2/ADAMTS8/ADAMTS5/KRR1/FOXN3/ZNF277/CHM/RPL35/NXPH2/KCTD12/AGAP1/ZNF354B/FGD4/TNFAIP8L1/TCEANC2/DNAJC21/CR1/RNF183/PABPC5/BEAN1/PRSS36/TRIM16L/CCBE1/TCF23/SGOL1/NIPAL1/SLC25A48/PRELID2/CD55/DBT/ZNF836/ZNF114/PKD1L1/ZNF800/DLX1/DNMT3A/DHFRL1/ERBB4/AKT2/ETV1/OR5B21/OR4D11/FAM200A/ZNF507/KIF1B/S…
CC	GO:0044464	cell part	232/ 255	15044/ 18229	8.67497e-05	0.00288742	0.0025174733366118	DDTL/ZBTB33/TRAPPC3L/CDH8/ACTR2/CDK6/TCIRG1/SIRPB1/ABCA7/NFAT5/ZNF268/SDCCAG8/SLC22A7/MAN1A2/KRR1/FOXN3/ZNF277/CHM/RPL35/KCTD12/AGAP1/ZNF354B/FGD4/TNFAIP8L1/TCEANC2/DNAJC21/CR1/PABPC5/PRSS36/TRIM16L/TCF23/SGOL1/SLC25A48/PRELID2/CD55/DBT/ZNF836/ZNF114/PKD1L1/ZNF800/DLX1/DNMT3A/DHFRL1/ERBB4/AKT2/ETV1/OR5B21/OR4D11/ZNF507/KIF1B/SPG20/SMC5/FMO1/FMOD/CHST5/DAPK2/FLRT3/CNOT6L/ALPI/ZNF396/GABRA4/NEGR1/K…
CC	GO:0005623	cell	232/ 255	15045/ 18229	8.74975e-05	0.00288742	0.0025174733366118	DDTL/ZBTB33/TRAPPC3L/CDH8/ACTR2/CDK6/TCIRG1/SIRPB1/ABCA7/NFAT5/ZNF268/SDCCAG8/SLC22A7/MAN1A2/KRR1/FOXN3/ZNF277/CHM/RPL35/KCTD12/AGAP1/ZNF354B/FGD4/TNFAIP8L1/TCEANC2/DNAJC21/CR1/PABPC5/PRSS36/TRIM16L/TCF23/SGOL1/SLC25A48/PRELID2/CD55/DBT/ZNF836/ZNF114/PKD1L1/ZNF800/DLX1/DNMT3A/DHFRL1/ERBB4/AKT2/ETV1/OR5B21/OR4D11/ZNF507/KIF1B/SPG20/SMC5/FMO1/FMOD/CHST5/DAPK2/FLRT3/CNOT6L/ALPI/ZNF396/GABRA4/NEGR1/K…
BP	GO:0008150	biological_process	248/ 248	16119/ 18229	4.51038e-14	3.25649e-11	2.2884234746267e-11	DDTL/ZBTB33/TRAPPC3L/C1orf68/CDH8/ACTR2/CDK6/TCIRG1/SIRPB1/ABCA7/NFAT5/ZNF268/SDCCAG8/SLC22A7/MAN1A2/ADAMTS8/ADAMTS5/KRR1/FOXN3/ZNF277/CHM/RPL35/NXPH2/KCTD12/AGAP1/ZNF354B/FGD4/SOCS4/TNFAIP8L1/TCEANC2/DNAJC21/CR1/GAB3/SPIN4/BEAN1/PRSS36/CCBE1/TCF23/SGOL1/NIPAL1/SLC25A48/PRELID2/CD55/DBT/ZNF836/ZNF114/LONRF2/PKD1L1/ZNF800/DLX1/DNMT3A/DHFRL1/ERBB4/AKT2/ETV1/OR5B21/OR4D11/ZNF507/KIF1B/SPG20/SMC5/FMO…
BP	GO:0009987	cellular process	225/ 248	14171/ 18229	5.03433e-08	1.81739e-05	0.000012771302989639	ZBTB33/CDH8/ACTR2/CDK6/TCIRG1/SIRPB1/ABCA7/NFAT5/ZNF268/SDCCAG8/SLC22A7/MAN1A2/ADAMTS8/ADAMTS5/KRR1/FOXN3/ZNF277/CHM/RPL35/NXPH2/KCTD12/AGAP1/ZNF354B/FGD4/SOCS4/TNFAIP8L1/TCEANC2/DNAJC21/CR1/GAB3/BEAN1/CCBE1/TCF23/SGOL1/SLC25A48/CD55/DBT/ZNF836/ZNF114/LONRF2/PKD1L1/ZNF800/DLX1/DNMT3A/DHFRL1/ERBB4/AKT2/ETV1/OR5B21/OR4D11/ZNF507/KIF1B/SPG20/SMC5/FMO1/FMOD/CHST5/DAPK2/FLRT3/CNOT6L/ALPI/ZNF396/ANKK1/…
BP	GO:0043170	macromolecule metabolic process	153/ 248	8206/ 18229	7.95776e-08	1.91517e-05	0.000013458387640898	ZBTB33/CDK6/ABCA7/NFAT5/ZNF268/MAN1A2/ADAMTS8/ADAMTS5/KRR1/FOXN3/ZNF277/CHM/RPL35/ZNF354B/SOCS4/TCEANC2/DNAJC21/CR1/PRSS36/CCBE1/CD55/ZNF836/ZNF114/LONRF2/ZNF800/DLX1/DNMT3A/ERBB4/AKT2/ETV1/ZNF507/SMC5/FMOD/CHST5/DAPK2/CNOT6L/ZNF396/ANKK1/KLK5/ZNF345/GIGYF2/GATA1/FBXW8/INTS6/GGT5/FOXP1/CACYBP/GLI3/GXYLT1/ZNF326/EOGT/GRIA1/GTF2I/PADI1/ZNF850/MACC1/ARSH/IGF1/INHBB/ITGAV/ITIH2/ZNF773/ERCC6L2/ZNF470/…
BP	GO:0006139	nucleobase-containing compound metabolic process	120/ 248	6088/ 18229	6.31928e-07	9.72335e-05	0.000068328546722054	ZBTB33/ABCA7/NFAT5/ZNF268/KRR1/FOXN3/ZNF277/CHM/RPL35/AGAP1/ZNF354B/FGD4/TCEANC2/ZNF836/ZNF114/LONRF2/ZNF800/DLX1/DNMT3A/DHFRL1/ERBB4/AKT2/ETV1/ZNF507/KIF1B/SMC5/FMO1/CNOT6L/ZNF396/ZNF345/IPCEF1/GATA1/INTS6/FOXP1/CACYBP/GLI3/ZNF326/GTF2I/ZNF850/MACC1/NME9/IGF1/ZNF773/ERCC6L2/ZNF470/LIN28B/LIMS1/ZNF880/SMAD1/MAF/ACHE/MRE11A/MSH3/MSH5/MYO7A/NF1/OVOL1/POLK/VGLL1/PDPK1/PEG3/PIK3R1/BRWD1/BNC2/HEATR1/N…
BP	GO:0090304	nucleic acid metabolic process	99/ 248	4705/ 18229	7.00438e-07	9.72335e-05	0.000068328546722054	ZBTB33/NFAT5/ZNF268/KRR1/FOXN3/ZNF277/RPL35/ZNF354B/TCEANC2/ZNF836/ZNF114/ZNF800/DLX1/DNMT3A/ERBB4/ETV1/ZNF507/SMC5/CNOT6L/ZNF396/ZNF345/GATA1/INTS6/FOXP1/CACYBP/GLI3/ZNF326/GTF2I/ZNF850/MACC1/IGF1/ZNF773/ERCC6L2/ZNF470/LIN28B/LIMS1/ZNF880/SMAD1/MAF/ACHE/MRE11A/MSH3/MSH5/OVOL1/POLK/VGLL1/PDPK1/PEG3/PIK3R1/BRWD1/BNC2/HEATR1/NOP10/ELAC1/SOX6/INTS8/CCDC88A/N4BP2/ZNF83/RAD18/SCAF1/REST/FIGNL1/SOX17/Z…
BP	GO:0044260	cellular macromolecule metabolic process	137/ 248	7299/ 18229	8.08035e-07	9.72335e-05	0.000068328546722054	ZBTB33/CDK6/ABCA7/NFAT5/ZNF268/MAN1A2/KRR1/FOXN3/ZNF277/CHM/RPL35/ZNF354B/SOCS4/TCEANC2/DNAJC21/ZNF836/ZNF114/ZNF800/DLX1/DNMT3A/ERBB4/AKT2/ETV1/ZNF507/SMC5/CHST5/DAPK2/CNOT6L/ZNF396/ANKK1/ZNF345/GIGYF2/GATA1/FBXW8/INTS6/FOXP1/CACYBP/GLI3/GXYLT1/ZNF326/EOGT/GRIA1/GTF2I/PADI1/ZNF850/MACC1/ARSH/IGF1/ITGAV/ZNF773/ERCC6L2/ZNF470/LIN28B/LIMS1/ZNF880/SMAD1/MAF/ACHE/MRE11A/MSH3/MSH5/MUC4/MUC7/NEK2/NF1/O…
BP	GO:0060255	regulation of macromolecule metabolic process	103/ 248	5062/ 18229	1.86035e-06	0.000182423	0.00012819315747016	ZBTB33/CDK6/ABCA7/NFAT5/ZNF268/FOXN3/ZNF277/ZNF354B/SOCS4/CR1/CCBE1/CD55/ZNF836/ZNF114/ZNF800/DLX1/DNMT3A/ERBB4/AKT2/ETV1/ZNF507/SPG20/CNOT6L/ZNF396/ZNF345/GIGYF2/GATA1/FOXP1/CACYBP/GLI3/ZNF326/GTF2I/ZNF850/MACC1/IGF1/INHBB/ITGAV/ITIH2/ZNF773/ZNF470/LIN28B/LIMS1/ZNF880/SMAD1/MAF/ACHE/MRE11A/MSH3/SERPINC1/NF1/OVOL1/PDCL/VGLL1/PDPK1/PEG3/PIK3R1/BRWD1/BNC2/SYNJ2BP/SOX6/CCDC88A/ZNF83/PRKCE/DBNDD2/RAD…
BP	GO:0006807	nitrogen compound metabolic process	129/ 248	6850/ 18229	2.26566e-06	0.000182423	0.00012819315747016	ZBTB33/ABCA7/NFAT5/ZNF268/KRR1/FOXN3/ZNF277/CHM/RPL35/AGAP1/ZNF354B/FGD4/TCEANC2/DBT/ZNF836/ZNF114/LONRF2/ZNF800/DLX1/DNMT3A/DHFRL1/ERBB4/AKT2/ETV1/ZNF507/KIF1B/SMC5/FMO1/FMOD/CHST5/CNOT6L/ZNF396/ZNF345/IPCEF1/GATA1/INTS6/GGT5/FOXP1/CACYBP/GLI3/GXYLT1/ZNF326/GTF2I/PADI1/ZNF850/MACC1/ARSH/NME9/IGF1/ITIH2/ZNF773/ERCC6L2/ZNF470/LIN28B/LIMS1/ZNF880/SMAD1/MAF/ACHE/MRE11A/MSH3/MSH5/MYO7A/NF1/OVOL1/CSAD…
BP	GO:0009059	macromolecule biosynthetic process	95/ 248	4575/ 18229	2.60026e-06	0.000182423	0.00012819315747016	ZBTB33/ABCA7/NFAT5/ZNF268/MAN1A2/FOXN3/ZNF277/RPL35/ZNF354B/TCEANC2/ZNF836/ZNF114/ZNF800/DLX1/DNMT3A/ERBB4/AKT2/ETV1/ZNF507/FMOD/CHST5/CNOT6L/ZNF396/ZNF345/GIGYF2/GATA1/FOXP1/CACYBP/GLI3/GXYLT1/ZNF326/EOGT/GTF2I/ZNF850/MACC1/IGF1/INHBB/ITGAV/ZNF773/ZNF470/LIN28B/LIMS1/ZNF880/SMAD1/MAF/ACHE/MRE11A/MUC4/MUC7/OVOL1/POLK/VGLL1/PDPK1/PEG3/PIK3R1/BRWD1/BNC2/SOX6/CCDC88A/ZNF83/SCAF1/REST/MBOAT4/SOX17/ZF…
BP	GO:0044238	primary metabolic process	172/ 248	10042/ 18229	2.60658e-06	0.000182423	0.00012819315747016	ZBTB33/CDK6/ABCA7/NFAT5/ZNF268/MAN1A2/ADAMTS8/ADAMTS5/KRR1/FOXN3/ZNF277/CHM/RPL35/AGAP1/ZNF354B/FGD4/SOCS4/TCEANC2/DNAJC21/CR1/PRSS36/CCBE1/CD55/DBT/ZNF836/ZNF114/LONRF2/ZNF800/DLX1/DNMT3A/DHFRL1/ERBB4/AKT2/ETV1/ZNF507/KIF1B/SMC5/FMO1/FMOD/CHST5/DAPK2/CNOT6L/ZNF396/ANKK1/KLK5/ZNF345/IPCEF1/GIGYF2/GATA1/FBXW8/INTS6/GGT5/FOXP1/CACYBP/GLI3/GXYLT1/ZNF326/EOGT/GTF2I/PADI1/ZNF850/APOC4/MACC1/ARSH/NME9/…
BP	GO:0046483	heterocycle metabolic process	120/ 248	6252/ 18229	2.87487e-06	0.000182423	0.00012819315747016	ZBTB33/ABCA7/NFAT5/ZNF268/KRR1/FOXN3/ZNF277/CHM/RPL35/AGAP1/ZNF354B/FGD4/TCEANC2/ZNF836/ZNF114/LONRF2/ZNF800/DLX1/DNMT3A/DHFRL1/ERBB4/AKT2/ETV1/ZNF507/KIF1B/SMC5/FMO1/CNOT6L/ZNF396/ZNF345/IPCEF1/GATA1/INTS6/FOXP1/CACYBP/GLI3/ZNF326/GTF2I/ZNF850/MACC1/NME9/IGF1/ZNF773/ERCC6L2/ZNF470/LIN28B/LIMS1/ZNF880/SMAD1/MAF/ACHE/MRE11A/MSH3/MSH5/MYO7A/NF1/OVOL1/POLK/VGLL1/PDPK1/PEG3/PIK3R1/BRWD1/BNC2/HEATR1/N…
BP	GO:0034641	cellular nitrogen compound metabolic process	123/ 248	6474/ 18229	3.28087e-06	0.000182423	0.00012819315747016	ZBTB33/ABCA7/NFAT5/ZNF268/KRR1/FOXN3/ZNF277/CHM/RPL35/AGAP1/ZNF354B/FGD4/TCEANC2/DBT/ZNF836/ZNF114/LONRF2/ZNF800/DLX1/DNMT3A/DHFRL1/ERBB4/AKT2/ETV1/ZNF507/KIF1B/SMC5/FMO1/CNOT6L/ZNF396/ZNF345/IPCEF1/GATA1/INTS6/GGT5/FOXP1/CACYBP/GLI3/ZNF326/GTF2I/ZNF850/MACC1/NME9/IGF1/ZNF773/ERCC6L2/ZNF470/LIN28B/LIMS1/ZNF880/SMAD1/MAF/ACHE/MRE11A/MSH3/MSH5/MYO7A/NF1/OVOL1/CSAD/POLK/VGLL1/PDPK1/PEG3/PIK3R1/BRWD1…
BP	GO:0019219	regulation of nucleobase-containing compound metabolic process	88/ 248	4180/ 18229	4.44515e-06	0.000229243	0.00016109504248193	ZBTB33/ABCA7/NFAT5/ZNF268/FOXN3/ZNF277/CHM/AGAP1/ZNF354B/FGD4/ZNF836/ZNF114/ZNF800/DLX1/DNMT3A/ERBB4/AKT2/ETV1/ZNF507/SPG20/CNOT6L/ZNF396/ZNF345/IPCEF1/GATA1/FOXP1/CACYBP/GLI3/ZNF326/GTF2I/ZNF850/MACC1/IGF1/ZNF773/ZNF470/LIN28B/LIMS1/ZNF880/SMAD1/MAF/MRE11A/MSH3/NF1/OVOL1/VGLL1/PDPK1/PEG3/PIK3R1/BRWD1/BNC2/SOX6/CCDC88A/ZNF83/RAD18/REST/FIGNL1/SOX17/ZFP62/SP4/BRDT/TBXA2R/TEAD1/TNF/ZNF33A/ZNF121/ZN…
BP	GO:0010556	regulation of macromolecule biosynthetic process	80/ 248	3696/ 18229	5.41452e-06	0.000260619	0.00018314376733867	ZBTB33/ABCA7/NFAT5/ZNF268/FOXN3/ZNF277/ZNF354B/ZNF836/ZNF114/ZNF800/DLX1/DNMT3A/ERBB4/AKT2/ETV1/ZNF507/SPG20/CNOT6L/ZNF396/ZNF345/GIGYF2/GATA1/FOXP1/CACYBP/GLI3/ZNF326/GTF2I/ZNF850/MACC1/IGF1/INHBB/ITGAV/ZNF773/ZNF470/LIN28B/LIMS1/ZNF880/SMAD1/MAF/MRE11A/OVOL1/VGLL1/PDPK1/PEG3/PIK3R1/BRWD1/BNC2/SOX6/CCDC88A/ZNF83/REST/SOX17/ZFP62/SP4/BRDT/TEAD1/TNF/ZNF33A/ZNF121/ZNF175/ZNF208/ZNF655/ZNF426/NAA16/…
BP	GO:2000112	regulation of cellular macromolecule biosynthetic process	78/ 248	3584/ 18229	6.15737e-06	0.000277851	0.00019525340009859	ZBTB33/ABCA7/NFAT5/ZNF268/FOXN3/ZNF277/ZNF354B/ZNF836/ZNF114/ZNF800/DLX1/DNMT3A/ERBB4/AKT2/ETV1/ZNF507/SPG20/CNOT6L/ZNF396/ZNF345/GIGYF2/GATA1/FOXP1/CACYBP/GLI3/ZNF326/GTF2I/ZNF850/MACC1/IGF1/ZNF773/ZNF470/LIN28B/LIMS1/ZNF880/SMAD1/MAF/MRE11A/OVOL1/VGLL1/PDPK1/PEG3/PIK3R1/BRWD1/BNC2/SOX6/CCDC88A/ZNF83/REST/SOX17/ZFP62/SP4/BRDT/TEAD1/TNF/ZNF33A/ZNF121/ZNF175/ZNF208/ZNF655/ZNF426/NAA16/SUV39H2/CARF…
BP	GO:0034645	cellular macromolecule biosynthetic process	91/ 248	4436/ 18229	8.35904e-06	0.00033529	0.00023561740575224	ZBTB33/ABCA7/NFAT5/ZNF268/MAN1A2/FOXN3/ZNF277/RPL35/ZNF354B/TCEANC2/ZNF836/ZNF114/ZNF800/DLX1/DNMT3A/ERBB4/AKT2/ETV1/ZNF507/CNOT6L/ZNF396/ZNF345/GIGYF2/GATA1/FOXP1/CACYBP/GLI3/GXYLT1/ZNF326/EOGT/GTF2I/ZNF850/MACC1/IGF1/ZNF773/ZNF470/LIN28B/LIMS1/ZNF880/SMAD1/MAF/ACHE/MRE11A/MUC4/MUC7/OVOL1/POLK/VGLL1/PDPK1/PEG3/PIK3R1/BRWD1/BNC2/SOX6/CCDC88A/ZNF83/SCAF1/REST/MBOAT4/SOX17/ZFP62/SP4/BRDT/TEAD1/TNF/…
BP	GO:0051171	regulation of nitrogen compound metabolic process	88/ 248	4274/ 18229	1.12543e-05	0.000427663	0.00030053037343706	ZBTB33/ABCA7/NFAT5/ZNF268/FOXN3/ZNF277/CHM/AGAP1/ZNF354B/FGD4/ZNF836/ZNF114/ZNF800/DLX1/DNMT3A/ERBB4/AKT2/ETV1/ZNF507/SPG20/CNOT6L/ZNF396/ZNF345/IPCEF1/GATA1/FOXP1/CACYBP/GLI3/ZNF326/GTF2I/ZNF850/MACC1/IGF1/ZNF773/ZNF470/LIN28B/LIMS1/ZNF880/SMAD1/MAF/MRE11A/MSH3/NF1/OVOL1/VGLL1/PDPK1/PEG3/PIK3R1/BRWD1/BNC2/SOX6/CCDC88A/ZNF83/RAD18/REST/FIGNL1/SOX17/ZFP62/SP4/BRDT/TBXA2R/TEAD1/TNF/ZNF33A/ZNF121/ZN…
BP	GO:0006355	regulation of transcription, DNA-templated	72/ 248	3287/ 18229	1.33594e-05	0.000482274	0.00033890634692136	ZBTB33/NFAT5/ZNF268/FOXN3/ZNF277/ZNF354B/ZNF836/ZNF114/ZNF800/DLX1/DNMT3A/ERBB4/ETV1/ZNF507/SPG20/CNOT6L/ZNF396/ZNF345/GATA1/FOXP1/GLI3/ZNF326/GTF2I/ZNF850/MACC1/IGF1/ZNF773/ZNF470/LIN28B/LIMS1/ZNF880/SMAD1/MAF/OVOL1/VGLL1/PDPK1/PEG3/PIK3R1/BRWD1/BNC2/SOX6/ZNF83/REST/SOX17/ZFP62/SP4/BRDT/TEAD1/TNF/ZNF33A/ZNF121/ZNF175/ZNF208/ZNF655/ZNF426/NAA16/SUV39H2/CARF/ZNF671/NANOG/SETD7/PHF6/ZNF528/TRIM52/Z…
BP	GO:1901360	organic cyclic compound metabolic process	120/ 248	6471/ 18229	1.8457e-05	0.000595863	0.0004187283248408	ZBTB33/ABCA7/NFAT5/ZNF268/KRR1/FOXN3/ZNF277/CHM/RPL35/AGAP1/ZNF354B/FGD4/TCEANC2/ZNF836/ZNF114/LONRF2/ZNF800/DLX1/DNMT3A/DHFRL1/ERBB4/AKT2/ETV1/ZNF507/KIF1B/SMC5/FMO1/CNOT6L/ZNF396/ZNF345/IPCEF1/GATA1/INTS6/FOXP1/CACYBP/GLI3/ZNF326/GTF2I/ZNF850/MACC1/NME9/IGF1/ZNF773/ERCC6L2/ZNF470/LIN28B/LIMS1/ZNF880/SMAD1/MAF/ACHE/MRE11A/MSH3/MSH5/MYO7A/NF1/OVOL1/POLK/VGLL1/PDPK1/PEG3/PIK3R1/BRWD1/BNC2/HEATR1/N…
BP	GO:0009889	regulation of biosynthetic process	81/ 248	3889/ 18229	2.03004e-05	0.000595863	0.0004187283248408	ZBTB33/ABCA7/NFAT5/ZNF268/FOXN3/ZNF277/ZNF354B/ZNF836/ZNF114/ZNF800/DLX1/DNMT3A/ERBB4/AKT2/ETV1/ZNF507/SPG20/CNOT6L/ZNF396/ZNF345/GIGYF2/GATA1/FOXP1/CACYBP/GLI3/ZNF326/GTF2I/ZNF850/MACC1/IGF1/INHBB/ITGAV/ZNF773/ZNF470/LIN28B/LIMS1/ZNF880/SMAD1/MAF/MRE11A/NF1/OVOL1/VGLL1/PDPK1/PEG3/PIK3R1/BRWD1/BNC2/SOX6/CCDC88A/ZNF83/REST/SOX17/ZFP62/SP4/BRDT/TEAD1/TNF/ZNF33A/ZNF121/ZNF175/ZNF208/ZNF655/ZNF426/NA…
BP	GO:2001141	regulation of RNA biosynthetic process	72/ 248	3327/ 18229	2.03617e-05	0.000595863	0.0004187283248408	ZBTB33/NFAT5/ZNF268/FOXN3/ZNF277/ZNF354B/ZNF836/ZNF114/ZNF800/DLX1/DNMT3A/ERBB4/ETV1/ZNF507/SPG20/CNOT6L/ZNF396/ZNF345/GATA1/FOXP1/GLI3/ZNF326/GTF2I/ZNF850/MACC1/IGF1/ZNF773/ZNF470/LIN28B/LIMS1/ZNF880/SMAD1/MAF/OVOL1/VGLL1/PDPK1/PEG3/PIK3R1/BRWD1/BNC2/SOX6/ZNF83/REST/SOX17/ZFP62/SP4/BRDT/TEAD1/TNF/ZNF33A/ZNF121/ZNF175/ZNF208/ZNF655/ZNF426/NAA16/SUV39H2/CARF/ZNF671/NANOG/SETD7/PHF6/ZNF528/TRIM52/Z…
BP	GO:0006351	transcription, DNA-templated	73/ 248	3390/ 18229	2.06324e-05	0.000595863	0.0004187283248408	ZBTB33/NFAT5/ZNF268/FOXN3/ZNF277/ZNF354B/TCEANC2/ZNF836/ZNF114/ZNF800/DLX1/DNMT3A/ERBB4/ETV1/ZNF507/CNOT6L/ZNF396/ZNF345/GATA1/FOXP1/GLI3/ZNF326/GTF2I/ZNF850/MACC1/IGF1/ZNF773/ZNF470/LIN28B/LIMS1/ZNF880/SMAD1/MAF/OVOL1/VGLL1/PDPK1/PEG3/PIK3R1/BRWD1/BNC2/SOX6/ZNF83/SCAF1/REST/SOX17/ZFP62/SP4/BRDT/TEAD1/TNF/ZNF33A/ZNF121/ZNF175/ZNF208/ZNF655/ZNF426/NAA16/SUV39H2/CARF/ZNF671/NANOG/SETD7/PHF6/ZNF528/…
BP	GO:0031323	regulation of cellular metabolic process	104/ 248	5404/ 18229	2.29029e-05	0.000635996	0.00044693137318023	ZBTB33/ABCA7/NFAT5/ZNF268/FOXN3/ZNF277/CHM/AGAP1/ZNF354B/FGD4/SOCS4/ZNF836/ZNF114/ZNF800/DLX1/DNMT3A/ERBB4/AKT2/ETV1/ZNF507/SPG20/DAPK2/CNOT6L/ZNF396/ZNF345/IPCEF1/GIGYF2/GATA1/FOXP1/CACYBP/GLI3/PPP1R37/ZNF326/GTF2I/ZNF850/MACC1/IGF1/INHBB/ITGAV/ZNF773/SCIMP/ZNF470/LIN28B/LIMS1/ZNF880/SMAD1/MAF/ACHE/MRE11A/MSH3/NF1/OVOL1/PDCL/VGLL1/PDPK1/PEG3/PIK3R1/BRWD1/BNC2/SYNJ2BP/SOX6/CCDC88A/ZNF83/PRKCE/DBN…
BP	GO:0031326	regulation of cellular biosynthetic process	80/ 248	3844/ 18229	2.42306e-05	0.00063665	0.0004473908389067	ZBTB33/ABCA7/NFAT5/ZNF268/FOXN3/ZNF277/ZNF354B/ZNF836/ZNF114/ZNF800/DLX1/DNMT3A/ERBB4/AKT2/ETV1/ZNF507/SPG20/CNOT6L/ZNF396/ZNF345/GIGYF2/GATA1/FOXP1/CACYBP/GLI3/ZNF326/GTF2I/ZNF850/MACC1/IGF1/INHBB/ZNF773/ZNF470/LIN28B/LIMS1/ZNF880/SMAD1/MAF/MRE11A/NF1/OVOL1/VGLL1/PDPK1/PEG3/PIK3R1/BRWD1/BNC2/SOX6/CCDC88A/ZNF83/REST/SOX17/ZFP62/SP4/BRDT/TEAD1/TNF/ZNF33A/ZNF121/ZNF175/ZNF208/ZNF655/ZNF426/NAA16/SU…
BP	GO:0019222	regulation of metabolic process	113/ 248	6025/ 18229	2.49269e-05	0.00063665	0.0004473908389067	ZBTB33/CDK6/ABCA7/NFAT5/ZNF268/FOXN3/ZNF277/CHM/AGAP1/ZNF354B/FGD4/SOCS4/CR1/CCBE1/CD55/ZNF836/ZNF114/ZNF800/DLX1/DNMT3A/ERBB4/AKT2/ETV1/ZNF507/SPG20/DAPK2/CNOT6L/ZNF396/ZNF345/IPCEF1/GIGYF2/GATA1/FOXP1/CACYBP/GLI3/PPP1R37/ZNF326/GTF2I/ZNF850/MACC1/IGF1/INHBB/ITGAV/ITIH2/ZNF773/SCIMP/ZNF470/LIN28B/LIMS1/ZNF880/SMAD1/MAF/ACHE/MRE11A/MSH3/SERPINC1/NF1/OVOL1/PDCL/ANGPTL4/VGLL1/PDPK1/PEG3/PIK3R1/BRWD…
BP	GO:0051252	regulation of RNA metabolic process	73/ 248	3411/ 18229	2.55718e-05	0.00063665	0.0004473908389067	ZBTB33/NFAT5/ZNF268/FOXN3/ZNF277/ZNF354B/ZNF836/ZNF114/ZNF800/DLX1/DNMT3A/ERBB4/ETV1/ZNF507/SPG20/CNOT6L/ZNF396/ZNF345/GATA1/FOXP1/GLI3/ZNF326/GTF2I/ZNF850/MACC1/IGF1/ZNF773/ZNF470/LIN28B/LIMS1/ZNF880/SMAD1/MAF/OVOL1/VGLL1/PDPK1/PEG3/PIK3R1/BRWD1/BNC2/SOX6/ZNF83/REST/SOX17/ZFP62/SP4/BRDT/TEAD1/TNF/ZNF33A/ZNF121/ZNF175/ZNF208/ZNF655/ZNF426/NAA16/SUV39H2/CARF/ZNF671/NANOG/SETD7/PHF6/ZNF528/TRIM52/Z…
BP	GO:0080090	regulation of primary metabolic process	104/ 248	5434/ 18229	2.94695e-05	0.000709233	0.00049839705640253	ZBTB33/ABCA7/NFAT5/ZNF268/FOXN3/ZNF277/CHM/AGAP1/ZNF354B/FGD4/SOCS4/CR1/CCBE1/CD55/ZNF836/ZNF114/ZNF800/DLX1/DNMT3A/ERBB4/AKT2/ETV1/ZNF507/SPG20/CNOT6L/ZNF396/ZNF345/IPCEF1/GIGYF2/GATA1/FOXP1/CACYBP/GLI3/ZNF326/GTF2I/ZNF850/MACC1/IGF1/INHBB/ITGAV/ITIH2/ZNF773/ZNF470/LIN28B/LIMS1/ZNF880/SMAD1/MAF/MRE11A/MSH3/SERPINC1/NF1/OVOL1/PDCL/VGLL1/PDPK1/PEG3/PIK3R1/BRWD1/BNC2/SOX6/CCDC88A/ZNF83/PRKCE/DBNDD2…
BP	GO:0032774	RNA biosynthetic process	74/ 248	3505/ 18229	3.51332e-05	0.000818264	0.00057501575787746	ZBTB33/NFAT5/ZNF268/FOXN3/ZNF277/RPL35/ZNF354B/TCEANC2/ZNF836/ZNF114/ZNF800/DLX1/DNMT3A/ERBB4/ETV1/ZNF507/CNOT6L/ZNF396/ZNF345/GATA1/FOXP1/GLI3/ZNF326/GTF2I/ZNF850/MACC1/IGF1/ZNF773/ZNF470/LIN28B/LIMS1/ZNF880/SMAD1/MAF/OVOL1/VGLL1/PDPK1/PEG3/PIK3R1/BRWD1/BNC2/SOX6/ZNF83/SCAF1/REST/SOX17/ZFP62/SP4/BRDT/TEAD1/TNF/ZNF33A/ZNF121/ZNF175/ZNF208/ZNF655/ZNF426/NAA16/SUV39H2/CARF/ZNF671/NANOG/SETD7/PHF6/Z…
BP	GO:0010468	regulation of gene expression	81/ 248	3966/ 18229	4.20881e-05	0.000949613	0.00066731831240327	ZBTB33/CDK6/NFAT5/ZNF268/FOXN3/ZNF277/ZNF354B/SOCS4/CR1/CCBE1/CD55/ZNF836/ZNF114/ZNF800/DLX1/DNMT3A/ERBB4/AKT2/ETV1/ZNF507/SPG20/CNOT6L/ZNF396/ZNF345/GIGYF2/GATA1/FOXP1/GLI3/ZNF326/GTF2I/ZNF850/MACC1/IGF1/ZNF773/ZNF470/LIN28B/LIMS1/ZNF880/SMAD1/MAF/OVOL1/VGLL1/PDPK1/PEG3/PIK3R1/BRWD1/BNC2/SOX6/ZNF83/RAB27A/REST/SOX17/ZFP62/SP4/BRDT/TEAD1/TNF/ZNF33A/ZNF121/ZNF175/ZNF208/ZNF655/ZNF426/NAA16/SUV39H2…
BP	GO:0044249	cellular biosynthetic process	101/ 248	5402/ 18229	0.000115597	0.00238461	0.0016757286605677	ZBTB33/ABCA7/NFAT5/ZNF268/MAN1A2/FOXN3/ZNF277/RPL35/ZNF354B/TCEANC2/ZNF836/ZNF114/ZNF800/DLX1/DNMT3A/DHFRL1/ERBB4/AKT2/ETV1/ZNF507/FMOD/CHST5/CNOT6L/ZNF396/ZNF345/GIGYF2/GATA1/GGT5/FOXP1/CACYBP/GLI3/GXYLT1/ZNF326/EOGT/GTF2I/PADI1/ZNF850/MACC1/NME9/IGF1/INHBB/ZNF773/ZNF470/LIN28B/LIMS1/ZNF880/SMAD1/MAF/ACHE/MRE11A/MUC4/MUC7/NF1/OVOL1/CSAD/POLK/VGLL1/PDPK1/PEG3/PIK3C2A/PIK3R1/BRWD1/BNC2/SOX6/CCDC88…
BP	GO:0034654	nucleobase-containing compound biosynthetic process	77/ 248	3834/ 18229	0.000128075	0.00256861	0.001805031577493	ZBTB33/NFAT5/ZNF268/FOXN3/ZNF277/RPL35/ZNF354B/TCEANC2/ZNF836/ZNF114/ZNF800/DLX1/DNMT3A/DHFRL1/ERBB4/ETV1/ZNF507/CNOT6L/ZNF396/ZNF345/GATA1/FOXP1/GLI3/ZNF326/GTF2I/ZNF850/MACC1/NME9/IGF1/ZNF773/ZNF470/LIN28B/LIMS1/ZNF880/SMAD1/MAF/NF1/OVOL1/VGLL1/PDPK1/PEG3/PIK3R1/BRWD1/BNC2/SOX6/ZNF83/SCAF1/REST/SOX17/ZFP62/SP4/BRDT/TEAD1/TNF/ZNF33A/ZNF121/ZNF175/ZNF208/ZNF655/ZNF426/NAA16/SUV39H2/CARF/ZNF671/NA…
BP	GO:0016070	RNA metabolic process	82/ 248	4169/ 18229	0.000142749	0.00271224	0.0019059612669105	ZBTB33/NFAT5/ZNF268/KRR1/FOXN3/ZNF277/RPL35/ZNF354B/TCEANC2/ZNF836/ZNF114/ZNF800/DLX1/DNMT3A/ERBB4/ETV1/ZNF507/CNOT6L/ZNF396/ZNF345/GATA1/INTS6/FOXP1/GLI3/ZNF326/GTF2I/ZNF850/MACC1/IGF1/ZNF773/ZNF470/LIN28B/LIMS1/ZNF880/SMAD1/MAF/OVOL1/VGLL1/PDPK1/PEG3/PIK3R1/BRWD1/BNC2/HEATR1/NOP10/ELAC1/SOX6/INTS8/ZNF83/SCAF1/REST/SOX17/ZFP62/SP4/BRDT/TEAD1/TNF/ZNF33A/ZNF121/ZNF175/ZNF208/ZNF655/ZNF426/NAA16/SU…
BP	GO:1901576	organic substance biosynthetic process	102/ 248	5504/ 18229	0.000150091	0.0027786	0.0019525967635854	ZBTB33/ABCA7/NFAT5/ZNF268/MAN1A2/FOXN3/ZNF277/RPL35/ZNF354B/TCEANC2/ZNF836/ZNF114/ZNF800/DLX1/DNMT3A/DHFRL1/ERBB4/AKT2/ETV1/ZNF507/FMOD/CHST5/CNOT6L/ZNF396/ZNF345/GIGYF2/GATA1/GGT5/FOXP1/CACYBP/GLI3/GXYLT1/ZNF326/EOGT/GTF2I/PADI1/ZNF850/MACC1/NME9/IGF1/INHBB/ITGAV/ZNF773/ZNF470/LIN28B/LIMS1/ZNF880/SMAD1/MAF/ACHE/MRE11A/MUC4/MUC7/NF1/OVOL1/CSAD/POLK/VGLL1/PDPK1/PEG3/PIK3C2A/PIK3R1/BRWD1/BNC2/SOX6/…
BP	GO:0009058	biosynthetic process	103/ 248	5583/ 18229	0.00016302	0.00294251	0.0020677777758834	ZBTB33/ABCA7/NFAT5/ZNF268/MAN1A2/FOXN3/ZNF277/RPL35/ZNF354B/TCEANC2/ZNF836/ZNF114/ZNF800/DLX1/DNMT3A/DHFRL1/ERBB4/AKT2/ETV1/ZNF507/FMOD/CHST5/CNOT6L/ZNF396/ZNF345/GIGYF2/GATA1/GGT5/FOXP1/CACYBP/GLI3/GXYLT1/ZNF326/EOGT/GTF2I/PADI1/ZNF850/MACC1/NME9/IGF1/INHBB/ITGAV/ZNF773/ZNF470/LIN28B/LIMS1/ZNF880/SMAD1/MAF/ACHE/MRE11A/MUC4/MUC7/NF1/OVOL1/CSAD/POLK/VGLL1/PDPK1/PEG3/PIK3C2A/PIK3R1/BRWD1/BNC2/SOX6/…
BP	GO:0010467	gene expression	92/ 248	4868/ 18229	0.000198551	0.00349643	0.0024570358917525	ZBTB33/CDK6/NFAT5/ZNF268/KRR1/FOXN3/ZNF277/RPL35/ZNF354B/SOCS4/TCEANC2/CR1/CCBE1/CD55/ZNF836/ZNF114/ZNF800/DLX1/DNMT3A/ERBB4/AKT2/ETV1/ZNF507/CNOT6L/ZNF396/ZNF345/GIGYF2/GATA1/INTS6/FOXP1/GLI3/ZNF326/GTF2I/ZNF850/MACC1/IGF1/ZNF773/ZNF470/LIN28B/LIMS1/ZNF880/SMAD1/MAF/OVOL1/VGLL1/PDPK1/PEG3/PIK3R1/BRWD1/BNC2/HEATR1/NOP10/ELAC1/SOX6/INTS8/ZNF83/SCAF1/RAB27A/REST/SOX17/ZFP62/SP4/BRDT/TEAD1/TNF/ZNF33…
BP	GO:0044271	cellular nitrogen compound biosynthetic process	78/ 248	3962/ 18229	0.000220574	0.00379178	0.0026645813903708	ZBTB33/NFAT5/ZNF268/FOXN3/ZNF277/RPL35/ZNF354B/TCEANC2/ZNF836/ZNF114/ZNF800/DLX1/DNMT3A/DHFRL1/ERBB4/ETV1/ZNF507/CNOT6L/ZNF396/ZNF345/GATA1/GGT5/FOXP1/GLI3/ZNF326/GTF2I/ZNF850/MACC1/NME9/IGF1/ZNF773/ZNF470/LIN28B/LIMS1/ZNF880/SMAD1/MAF/NF1/OVOL1/VGLL1/PDPK1/PEG3/PIK3R1/BRWD1/BNC2/SOX6/ZNF83/SCAF1/REST/SOX17/ZFP62/SP4/BRDT/TEAD1/TNF/ZNF33A/ZNF121/ZNF175/ZNF208/ZNF655/ZNF426/NAA16/SUV39H2/CARF/ZNF6…
BP	GO:0018130	heterocycle biosynthetic process	77/ 248	3901/ 18229	0.000227205	0.00381493	0.0026808484972966	ZBTB33/NFAT5/ZNF268/FOXN3/ZNF277/RPL35/ZNF354B/TCEANC2/ZNF836/ZNF114/ZNF800/DLX1/DNMT3A/DHFRL1/ERBB4/ETV1/ZNF507/CNOT6L/ZNF396/ZNF345/GATA1/FOXP1/GLI3/ZNF326/GTF2I/ZNF850/MACC1/NME9/IGF1/ZNF773/ZNF470/LIN28B/LIMS1/ZNF880/SMAD1/MAF/NF1/OVOL1/VGLL1/PDPK1/PEG3/PIK3R1/BRWD1/BNC2/SOX6/ZNF83/SCAF1/REST/SOX17/ZFP62/SP4/BRDT/TEAD1/TNF/ZNF33A/ZNF121/ZNF175/ZNF208/ZNF655/ZNF426/NAA16/SUV39H2/CARF/ZNF671/NA…
BP	GO:0019438	aromatic compound biosynthetic process	77/ 248	3906/ 18229	0.000236886	0.00388708	0.0027315554126958	ZBTB33/NFAT5/ZNF268/FOXN3/ZNF277/RPL35/ZNF354B/TCEANC2/ZNF836/ZNF114/ZNF800/DLX1/DNMT3A/DHFRL1/ERBB4/ETV1/ZNF507/CNOT6L/ZNF396/ZNF345/GATA1/FOXP1/GLI3/ZNF326/GTF2I/ZNF850/MACC1/NME9/IGF1/ZNF773/ZNF470/LIN28B/LIMS1/ZNF880/SMAD1/MAF/NF1/OVOL1/VGLL1/PDPK1/PEG3/PIK3R1/BRWD1/BNC2/SOX6/ZNF83/SCAF1/REST/SOX17/ZFP62/SP4/BRDT/TEAD1/TNF/ZNF33A/ZNF121/ZNF175/ZNF208/ZNF655/ZNF426/NAA16/SUV39H2/CARF/ZNF671/NA…
BP	GO:0010605	negative regulation of macromolecule metabolic process	39/ 248	1622/ 18229	0.000333213	0.00518774	0.0036455650495839	ZBTB33/ABCA7/ZNF268/FOXN3/SOCS4/CR1/CD55/DLX1/DNMT3A/CNOT6L/ZNF345/GIGYF2/GATA1/FOXP1/GLI3/INHBB/ITGAV/LIN28B/LIMS1/SMAD1/MAF/MRE11A/MSH3/NF1/OVOL1/PDCL/PDPK1/SOX6/DBNDD2/RAD18/REST/PBLD/SOX17/TNF/SUV39H2/NANOG/HDAC9/TRIM14/NR1D2
BP	GO:1903046	meiotic cell cycle process	7/ 248	96/ 18229	0.000337706	0.00518774	0.0036455650495839	ACTR2/SGOL1/MRE11A/MSH3/MSH5/OVOL1/BRDT
BP	GO:0010632	regulation of epithelial cell migration	8/ 248	128/ 18229	0.000368324	0.00554021	0.0038932533458222	CCBE1/TACSTD2/NF1/PDPK1/PRKCE/PBLD/SEMA5A/HDAC9
BP	GO:2000145	regulation of cell motility	18/ 248	537/ 18229	0.000420681	0.00619861	0.0043559280823486	CDK6/ZNF268/CCBE1/ERBB4/AKT2/IGF1/ITGAV/TACSTD2/NF1/PDPK1/PIK3R1/PRKCE/PRKX/KIAA1598/PBLD/TNF/SEMA5A/HDAC9
BP	GO:0050793	regulation of developmental process	41/ 248	1763/ 18229	0.000457534	0.00651427	0.0045777508290891	CDK6/ZNF268/ZNF277/FGD4/CCBE1/DLX1/ERBB4/SPG20/NEGR1/GATA1/FBXW8/GLI3/UTS2R/GTF2I/IGF1/ITGAV/LIMS1/TACSTD2/SMAD1/MAF/ACHE/NF1/ANGPTL4/PIK3R1/BRWD1/SOX6/CCDC88A/PRKX/KIAA1598/REST/PBLD/SOX17/TBXA2R/TNF/NANOG/ADM2/PNPT1/SEMA5A/MYLK3/HDAC9/NR1D2
BP	GO:0045766	positive regulation of angiogenesis	7/ 248	101/ 18229	0.000460149	0.00651427	0.0045777508290891	CCBE1/UTS2R/ANGPTL4/TBXA2R/ADM2/SEMA5A/HDAC9
BP	GO:2000026	regulation of multicellular organismal development	33/ 248	1331/ 18229	0.000590901	0.00816474	0.0057375799941617	CDK6/CCBE1/DLX1/ERBB4/SPG20/NEGR1/GATA1/FBXW8/GLI3/UTS2R/GTF2I/IGF1/LIMS1/TACSTD2/SMAD1/MAF/ACHE/NF1/ANGPTL4/PIK3R1/SOX6/CCDC88A/PRKX/KIAA1598/REST/PBLD/SOX17/TBXA2R/TNF/ADM2/SEMA5A/HDAC9/NR1D2
BP	GO:1901362	organic cyclic compound biosynthetic process	77/ 248	4022/ 18229	0.000599351	0.00816474	0.0057375799941617	ZBTB33/NFAT5/ZNF268/FOXN3/ZNF277/RPL35/ZNF354B/TCEANC2/ZNF836/ZNF114/ZNF800/DLX1/DNMT3A/DHFRL1/ERBB4/ETV1/ZNF507/CNOT6L/ZNF396/ZNF345/GATA1/FOXP1/GLI3/ZNF326/GTF2I/ZNF850/MACC1/NME9/IGF1/ZNF773/ZNF470/LIN28B/LIMS1/ZNF880/SMAD1/MAF/NF1/OVOL1/VGLL1/PDPK1/PEG3/PIK3R1/BRWD1/BNC2/SOX6/ZNF83/SCAF1/REST/SOX17/ZFP62/SP4/BRDT/TEAD1/TNF/ZNF33A/ZNF121/ZNF175/ZNF208/ZNF655/ZNF426/NAA16/SUV39H2/CARF/ZNF671/NA…
BP	GO:0030334	regulation of cell migration	17/ 248	510/ 18229	0.000645403	0.00857999	0.0060293833672292	ZNF268/CCBE1/ERBB4/AKT2/IGF1/ITGAV/TACSTD2/NF1/PDPK1/PIK3R1/PRKCE/PRKX/KIAA1598/PBLD/TNF/SEMA5A/HDAC9
BP	GO:0001667	ameboidal cell migration	11/ 248	250/ 18229	0.0006536	0.00857999	0.0060293833672292	CCBE1/ERBB4/TACSTD2/NF1/PDPK1/PRKCE/PRKX/PBLD/SOX17/SEMA5A/HDAC9
BP	GO:0010631	epithelial cell migration	9/ 248	176/ 18229	0.000699281	0.00885756	0.0062244402623661	CCBE1/TACSTD2/NF1/PDPK1/PRKCE/PRKX/PBLD/SEMA5A/HDAC9
BP	GO:0090132	epithelium migration	9/ 248	176/ 18229	0.000699281	0.00885756	0.0062244402623661	CCBE1/TACSTD2/NF1/PDPK1/PRKCE/PRKX/PBLD/SEMA5A/HDAC9
BP	GO:0045765	regulation of angiogenesis	9/ 248	177/ 18229	0.000728181	0.00906459	0.0063699296216702	CCBE1/UTS2R/GTF2I/NF1/ANGPTL4/TBXA2R/ADM2/SEMA5A/HDAC9
BP	GO:0042306	regulation of protein import into nucleus	8/ 248	143/ 18229	0.000769218	0.00941315	0.0066148666434414	ZNF268/ERBB4/GLI3/IGF1/NF1/PBLD/TNF/SEMA5A
BP	GO:0090130	tissue migration	9/ 248	181/ 18229	0.000853696	0.0102728	0.0072189739800296	CCBE1/TACSTD2/NF1/PDPK1/PRKCE/PRKX/PBLD/SEMA5A/HDAC9
BP	GO:0051321	meiotic cell cycle	9/ 248	182/ 18229	0.000887677	0.0105066	0.0073832706100788	ACTR2/SGOL1/MRE11A/MSH3/MSH5/NEK2/OVOL1/BRDT/SUV39H2
BP	GO:0022603	regulation of anatomical structure morphogenesis	21/ 248	725/ 18229	0.000957277	0.0111172	0.0078123468799036	FGD4/CCBE1/SPG20/FBXW8/UTS2R/GTF2I/LIMS1/TACSTD2/SMAD1/ACHE/NF1/ANGPTL4/BRWD1/PBLD/SOX17/TBXA2R/TNF/ADM2/SEMA5A/MYLK3/HDAC9
BP	GO:0009892	negative regulation of metabolic process	40/ 248	1773/ 18229	0.000976587	0.0111172	0.0078123468799036	ZBTB33/ABCA7/ZNF268/FOXN3/SOCS4/CR1/CD55/DLX1/DNMT3A/CNOT6L/ZNF345/GIGYF2/GATA1/FOXP1/GLI3/IGF1/INHBB/ITGAV/LIN28B/LIMS1/SMAD1/MAF/MRE11A/MSH3/NF1/OVOL1/PDCL/PDPK1/SOX6/DBNDD2/RAD18/REST/PBLD/SOX17/TNF/SUV39H2/NANOG/HDAC9/TRIM14/NR1D2
BP	GO:0038034	signal transduction in absence of ligand	6/ 248	84/ 18229	0.00100086	0.0111172	0.0078123468799036	GATA1/IGF1/ITGAV/NF1/TNF/TNFRSF10B
BP	GO:0097192	extrinsic apoptotic signaling pathway in absence of ligand	6/ 248	84/ 18229	0.00100086	0.0111172	0.0078123468799036	GATA1/IGF1/ITGAV/NF1/TNF/TNFRSF10B
BP	GO:0006606	protein import into nucleus	10/ 248	226/ 18229	0.00109381	0.0116136	0.0081612133624057	ZNF268/ERBB4/GLI3/IGF1/NF1/PIK3R1/PBLD/TNF/RPAIN/SEMA5A
BP	GO:0044744	protein targeting to nucleus	10/ 248	226/ 18229	0.00109381	0.0116136	0.0081612133624057	ZNF268/ERBB4/GLI3/IGF1/NF1/PIK3R1/PBLD/TNF/RPAIN/SEMA5A
BP	GO:1902593	single-organism nuclear import	10/ 248	226/ 18229	0.00109381	0.0116136	0.0081612133624057	ZNF268/ERBB4/GLI3/IGF1/NF1/PIK3R1/PBLD/TNF/RPAIN/SEMA5A
BP	GO:0051170	nuclear import	10/ 248	230/ 18229	0.00124814	0.0130419	0.0091648771360431	ZNF268/ERBB4/GLI3/IGF1/NF1/PIK3R1/PBLD/TNF/RPAIN/SEMA5A
BP	GO:0040012	regulation of locomotion	18/ 248	591/ 18229	0.00126445	0.0130419	0.0091648771360431	CDK6/ZNF268/CCBE1/ERBB4/AKT2/IGF1/ITGAV/TACSTD2/NF1/PDPK1/PIK3R1/PRKCE/PRKX/KIAA1598/PBLD/TNF/SEMA5A/HDAC9
BP	GO:1901342	regulation of vasculature development	9/ 248	193/ 18229	0.00133941	0.0135384	0.0095137764117688	CCBE1/UTS2R/GTF2I/NF1/ANGPTL4/TBXA2R/ADM2/SEMA5A/HDAC9
BP	GO:1900180	regulation of protein localization to nucleus	8/ 248	156/ 18229	0.00135009	0.0135384	0.0095137764117688	ZNF268/ERBB4/GLI3/IGF1/NF1/PBLD/TNF/SEMA5A
BP	GO:0034504	protein localization to nucleus	9/ 248	194/ 18229	0.00138828	0.0137307	0.0096488932655961	ABCA7/ZNF268/ERBB4/GLI3/IGF1/NF1/PBLD/TNF/SEMA5A
BP	GO:0010001	glial cell differentiation	8/ 248	160/ 18229	0.00158585	0.0154728	0.010873135560201	CDK6/DLX1/AKT2/GLI3/IGF1/NF1/SOX6/MPP5
BP	GO:0051270	regulation of cellular component movement	18/ 248	604/ 18229	0.00160868	0.0154862	0.010882557689841	CDK6/ZNF268/CCBE1/ERBB4/AKT2/IGF1/ITGAV/TACSTD2/NF1/PDPK1/PIK3R1/PRKCE/PRKX/KIAA1598/PBLD/TNF/SEMA5A/HDAC9
BP	GO:0009896	positive regulation of catabolic process	9/ 248	204/ 18229	0.00196055	0.0186253	0.01308846572199	ZNF268/SOCS4/AKT2/IPCEF1/IGF1/PRKCE/SOX17/TNF/PNPT1
BP	GO:0090316	positive regulation of intracellular protein transport	7/ 248	130/ 18229	0.00202848	0.0190203	0.013366039543698	ZNF268/ERBB4/AKT2/GLI3/IGF1/TNF/SEMA5A
BP	GO:0032880	regulation of protein localization	16/ 248	524/ 18229	0.00227233	0.0210336	0.014780893646366	ZNF268/ERBB4/AKT2/ARFIP1/GLI3/IGF1/ACHE/NEK2/NF1/PDPK1/PIK3R1/SYNJ2BP/PBLD/TNF/SEMA5A/IL1RL1
BP	GO:0051050	positive regulation of transport	18/ 248	631/ 18229	0.00258222	0.0235995	0.016583995184109	ABCA7/ZNF268/ERBB4/AKT2/GLI3/ILDR1/IGF1/INHBB/ITGAV/ACHE/PDPK1/PIK3R1/SYNJ2BP/PRKCE/RAB27A/TNF/SEMA5A/IL1RL1
BP	GO:0007126	meiotic nuclear division	8/ 248	174/ 18229	0.0026782	0.0241707	0.016985395665439	ACTR2/SGOL1/MRE11A/MSH3/MSH5/NEK2/BRDT/SUV39H2
BP	GO:0017038	protein import	10/ 248	258/ 18229	0.0028972	0.0250909	0.017632029429744	ZNF268/ERBB4/GLI3/IGF1/NF1/PIK3R1/PBLD/TNF/RPAIN/SEMA5A
BP	GO:0072358	cardiovascular system development	22/ 248	848/ 18229	0.00290521	0.0250909	0.017632029429744	CHM/CCBE1/ERBB4/FBXW8/CACYBP/GLI3/UTS2R/GTF2I/IGF1/ITGAV/SMAD1/NF1/ANGPTL4/SOX6/PRKX/REST/SOX17/TBXA2R/ADM2/SEMA5A/MYLK3/HDAC9
BP	GO:0072359	circulatory system development	22/ 248	848/ 18229	0.00290521	0.0250909	0.017632029429744	CHM/CCBE1/ERBB4/FBXW8/CACYBP/GLI3/UTS2R/GTF2I/IGF1/ITGAV/SMAD1/NF1/ANGPTL4/SOX6/PRKX/REST/SOX17/TBXA2R/ADM2/SEMA5A/MYLK3/HDAC9
BP	GO:0070201	regulation of establishment of protein localization	14/ 248	440/ 18229	0.00291916	0.0250909	0.017632029429744	ZNF268/ERBB4/AKT2/ARFIP1/GLI3/IGF1/ACHE/NF1/PDPK1/PIK3R1/PBLD/TNF/SEMA5A/IL1RL1
BP	GO:0033157	regulation of intracellular protein transport	9/ 248	218/ 18229	0.0030628	0.0255521	0.01795613919946	ZNF268/ERBB4/AKT2/GLI3/IGF1/NF1/PBLD/TNF/SEMA5A
BP	GO:0010721	negative regulation of cell development	7/ 248	140/ 18229	0.00307728	0.0255521	0.01795613919946	DLX1/SPG20/TACSTD2/NF1/REST/PBLD/SEMA5A
BP	GO:0046822	regulation of nucleocytoplasmic transport	8/ 248	178/ 18229	0.00307899	0.0255521	0.01795613919946	ZNF268/ERBB4/GLI3/IGF1/NF1/PBLD/TNF/SEMA5A
BP	GO:0051130	positive regulation of cellular component organization	19/ 248	694/ 18229	0.00311536	0.0255601	0.017961771368083	ACTR2/ABCA7/AKT2/SMC5/CNOT6L/NEGR1/FBXW8/IGF1/ITGAV/SMAD1/PDPK1/PIK3R1/SYNJ2BP/PRKCE/TNF/WASF1/SEMA5A/MYLK3/FRMPD4
BP	GO:0009888	tissue development	36/ 248	1654/ 18229	0.00326577	0.0264931	0.018617387228518	C1orf68/CDK6/ERBB4/AKT2/SPG20/KLK5/GATA1/FBXW8/CACYBP/GLI3/IGF1/LCE2A/ITGAV/TACSTD2/SMAD1/MAF/ACHE/MYO7A/NF1/OVOL1/PDPK1/BNC2/SOX6/PRKX/RAB27A/REST/PBLD/SOX17/MPP5/TNF/NANOG/SEMA5A/MYLK3/CRLF1/HDAC9/NR1D2
BP	GO:0042063	gliogenesis	8/ 248	183/ 18229	0.00364398	0.0292328	0.020542684716549	CDK6/DLX1/AKT2/GLI3/IGF1/NF1/SOX6/MPP5
BP	GO:0032388	positive regulation of intracellular transport	8/ 248	184/ 18229	0.00376603	0.0295551	0.02076918031067	ZNF268/ERBB4/AKT2/GLI3/IGF1/PDPK1/TNF/SEMA5A
BP	GO:0010558	negative regulation of macromolecule biosynthetic process	26/ 248	1092/ 18229	0.00395691	0.0307193	0.021587243702004	ZBTB33/ABCA7/ZNF268/FOXN3/DLX1/DNMT3A/ZNF345/GIGYF2/GATA1/FOXP1/GLI3/INHBB/ITGAV/LIMS1/MAF/MRE11A/OVOL1/SOX6/REST/SOX17/TNF/SUV39H2/NANOG/HDAC9/TRIM14/NR1D2
BP	GO:0051222	positive regulation of protein transport	9/ 248	228/ 18229	0.00411335	0.0312614	0.021968227528903	ZNF268/ERBB4/AKT2/GLI3/IGF1/ACHE/TNF/SEMA5A/IL1RL1
BP	GO:0001944	vasculature development	16/ 248	561/ 18229	0.0044127	0.032845	0.023081077406228	CHM/CCBE1/FBXW8/GLI3/UTS2R/GTF2I/IGF1/ITGAV/NF1/ANGPTL4/PRKX/SOX17/TBXA2R/ADM2/SEMA5A/HDAC9
BP	GO:0045595	regulation of cell differentiation	29/ 248	1274/ 18229	0.00447485	0.0329678	0.023167344940447	CDK6/ZNF268/DLX1/SPG20/NEGR1/GATA1/FBXW8/GLI3/IGF1/ITGAV/TACSTD2/SMAD1/MAF/ACHE/NF1/PIK3R1/SOX6/CCDC88A/PRKX/KIAA1598/REST/PBLD/SOX17/TNF/NANOG/SEMA5A/MYLK3/HDAC9/NR1D2
BP	GO:0031589	cell-substrate adhesion	10/ 248	275/ 18229	0.00454469	0.0331441	0.023291256771174	CDK6/ITGAV/LIMS1/TACSTD2/MUC4/NF1/PDPK1/PIK3R1/PRKCE/PRKX
BP	GO:0031324	negative regulation of cellular metabolic process	35/ 248	1630/ 18229	0.00461895	0.0333489	0.023435116221768	ZBTB33/ABCA7/ZNF268/FOXN3/SOCS4/DLX1/DNMT3A/ZNF345/GIGYF2/GATA1/FOXP1/GLI3/IGF1/INHBB/ITGAV/LIMS1/MAF/MRE11A/MSH3/NF1/OVOL1/PDCL/PDPK1/SOX6/DBNDD2/RAD18/REST/PBLD/SOX17/TNF/SUV39H2/NANOG/HDAC9/TRIM14/NR1D2
BP	GO:0034613	cellular protein localization	27/ 248	1169/ 18229	0.0050021	0.0357576	0.025127773917171	ABCA7/ZNF268/CHM/RPL35/SGOL1/ERBB4/AKT2/ARFIP1/GLI3/CRACR2B/IGF1/MYO7A/NEK2/NF1/PDPK1/PIK3R1/LZTFL1/STX17/SYNJ2BP/RAB27A/PBLD/MPP5/TNF/PGAP1/RPAIN/STX11/SEMA5A
BP	GO:0001649	osteoblast differentiation	8/ 248	194/ 18229	0.00516803	0.0362989	0.025508222565377	CDK6/GLI3/IGF1/SMAD1/ACHE/NF1/FIGNL1/TNF
BP	GO:0070727	cellular macromolecule localization	27/ 248	1174/ 18229	0.00529016	0.0366508	0.025755474232507	ABCA7/ZNF268/CHM/RPL35/SGOL1/ERBB4/AKT2/ARFIP1/GLI3/CRACR2B/IGF1/MYO7A/NEK2/NF1/PDPK1/PIK3R1/LZTFL1/STX17/SYNJ2BP/RAB27A/PBLD/MPP5/TNF/PGAP1/RPAIN/STX11/SEMA5A
BP	GO:2000147	positive regulation of cell motility	10/ 248	284/ 18229	0.00567538	0.0379438	0.026664105787209	ZNF268/CCBE1/AKT2/IGF1/ITGAV/PIK3R1/PRKCE/TNF/SEMA5A/HDAC9
BP	GO:0051223	regulation of protein transport	12/ 248	377/ 18229	0.0056758	0.0379438	0.026664105787209	ZNF268/ERBB4/AKT2/ARFIP1/GLI3/IGF1/ACHE/NF1/PBLD/TNF/SEMA5A/IL1RL1
BP	GO:0032989	cellular component morphogenesis	27/ 248	1187/ 18229	0.00610493	0.0399141	0.028048680707404	ACTR2/FGD4/ETV1/SPG20/FLRT3/GATA1/FBXW8/GLI3/OR10A4/ITGAV/TACSTD2/SMAD1/MAP2/ACHE/MYO7A/BRWD1/SOX6/KIF27/KIAA1598/PBLD/SOX17/MPP5/PNPT1/WASF1/SEMA5A/TMEM67/MYLK3
BP	GO:0060341	regulation of cellular localization	22/ 248	904/ 18229	0.00613638	0.0399141	0.028048680707404	ZNF268/ERBB4/AKT2/ARFIP1/GLI3/ILDR1/IGF1/INHBB/ACHE/NEK2/NF1/PDPK1/PIK3R1/SYNJ2BP/PRKCE/RAB27A/REST/PBLD/NPVF/TNF/SEMA5A/IL1RL1
BP	GO:0045787	positive regulation of cell cycle	6/ 248	121/ 18229	0.00625186	0.0401046	0.02818256553989	SMC5/IGF1/OVOL1/TNF/NANOG/CCND2
BP	GO:0001568	blood vessel development	15/ 248	531/ 18229	0.00627676	0.0401046	0.02818256553989	CHM/CCBE1/FBXW8/GLI3/UTS2R/GTF2I/ITGAV/NF1/ANGPTL4/PRKX/SOX17/TBXA2R/ADM2/SEMA5A/HDAC9
BP	GO:0001525	angiogenesis	12/ 248	384/ 18229	0.00653781	0.0414061	0.029097184696724	CCBE1/UTS2R/GTF2I/ITGAV/NF1/ANGPTL4/PRKX/SOX17/TBXA2R/ADM2/SEMA5A/HDAC9
BP	GO:0051272	positive regulation of cellular component movement	10/ 248	291/ 18229	0.00669804	0.0420521	0.029551088575239	ZNF268/CCBE1/AKT2/IGF1/ITGAV/PIK3R1/PRKCE/TNF/SEMA5A/HDAC9
BP	GO:0043542	endothelial cell migration	6/ 248	125/ 18229	0.00729754	0.0454209	0.031918456879264	CCBE1/NF1/PDPK1/PRKX/SEMA5A/HDAC9
BP	GO:0048646	anatomical structure formation involved in morphogenesis	23/ 248	977/ 18229	0.00753624	0.0465057	0.03268076185658	ACTR2/SDCCAG8/CCBE1/GATA1/GLI3/UTS2R/GTF2I/ITGAV/SPEM1/SMAD1/NF1/ANGPTL4/KIF27/PRKX/SOX17/MPP5/TBXA2R/NANOG/ADM2/SEMA5A/TMEM67/MYLK3/HDAC9
BP	GO:0051172	negative regulation of nitrogen compound metabolic process	25/ 248	1097/ 18229	0.00804946	0.0486294	0.034173155259554	ZBTB33/ABCA7/ZNF268/FOXN3/DLX1/DNMT3A/ZNF345/GATA1/FOXP1/GLI3/LIMS1/MAF/MRE11A/MSH3/OVOL1/SOX6/RAD18/REST/SOX17/TNF/SUV39H2/NANOG/HDAC9/TRIM14/NR1D2
BP	GO:0040017	positive regulation of locomotion	10/ 248	300/ 18229	0.00821695	0.0490301	0.034454715490797	ZNF268/CCBE1/AKT2/IGF1/ITGAV/PIK3R1/PRKCE/TNF/SEMA5A/HDAC9
BP	GO:0044763	single-organism cellular process	177/ 248	11581/ 18229	0.0053301	0.0366508	0.025755474232507	ZBTB33/CDH8/ACTR2/CDK6/TCIRG1/SIRPB1/ABCA7/NFAT5/ZNF268/SDCCAG8/SLC22A7/MAN1A2/ADAMTS8/ADAMTS5/FOXN3/ZNF277/CHM/RPL35/NXPH2/KCTD12/AGAP1/FGD4/SOCS4/TNFAIP8L1/CR1/GAB3/BEAN1/CCBE1/TCF23/SGOL1/SLC25A48/CD55/DBT/LONRF2/PKD1L1/DLX1/DNMT3A/DHFRL1/ERBB4/AKT2/ETV1/OR5B21/OR4D11/KIF1B/SPG20/SMC5/FMO1/FMOD/CHST5/DAPK2/FLRT3/CNOT6L/GABRA4/NEGR1/KLK5/IPCEF1/GIGYF2/GATA1/FBXW8/INTS6/GGT5/CACYBP/ARFIP1/GLI3/G…

## Sheet: ChemDIS_pathway
Type	ID	Description	GeneRatio	Bg Ratio	P	Adj. P	Q	Genes
Reactome	212436	Generic Transcription Pathway	15/ 96	430/ 6958	0.00073179654170769	0.018294913542692	0.014635930834154	NR1D2/ZNF528/PEG3/ZNF208/ZNF773/ZNF655/ZNF566/ZNF671/ZNF33A/ZNF426/TEAD1/ZNF354B/ZNF175/ZNF470/ZNF114
Reactome	5173105	O-linked glycosylation	6/ 96	95/ 6958	0.0019083507950993	0.023854384938741	0.019083507950993	ADAMTS8/SEMA5A/ADAMTS5/MUC7/ADAMTSL4/MUC4

## Sheet: CTD_GO_MF
Ontology	Highest GO Level	GO Term Name	GO Term ID	P-value	Corrected P-value	Annotated Genes Quantity	Annotated Genes	Genome Frequency
Molecular Function	1	binding	GO:0005488	6.9e-46	3.57e-42	227	ABCA7|ABCG2|ACBD4|ACHE|ACTR2|ADAMTS5|ADAMTS8|ADAMTSL4|ADM2|AGAP1|AKT2|ALPI|ANGPTL4|ANKK1|ARFIP1|ARSH|BNC2|BRDT|CACYBP|CARF|CCBE1|CCDC88A|CCND2|CD3D|CD55|CDH23|CDH8|CDK6|CEP126|CEP19|CHM|CLEC4G|CNOT6L|CR1|CRACR2B|CRLF1|CSAD|DAPK2|DBNDD2|DBT|DHFR2|DLX1|DNAJC21|DNMT3A|ELAC1|ERBB4|ERCC6L2|ETV1|FAM111B|FAM200A|FAM92A|FBXO40|FBXW8|FCGR1A|FCGR1B|FGD4|FIGNL1|FIP1L1|FLRT3|FMO1|FOXN3|FOXP1|FRMPD4|GATA1|GIG…	13631/41905 genes: 32.53%
Molecular Function	2	protein binding	GO:0005515	2.56e-27	1.33e-23	170	ABCG2|ACHE|ACTR2|ADAMTS5|ADAMTS8|ADAMTSL4|ADM2|AKT2|ALPI|ANGPTL4|ARFIP1|BRDT|CACYBP|CCBE1|CCDC88A|CCND2|CD3D|CD55|CDH23|CDK6|CEP126|CEP19|CHM|CLEC4G|CNOT6L|CR1|CRACR2B|CRLF1|DAPK2|DBNDD2|DBT|DNAJC21|DNMT3A|ERBB4|ETV1|FAM111B|FAM200A|FAM92A|FBXW8|FCGR1A|FCGR1B|FGD4|FIGNL1|FIP1L1|FLRT3|FOXN3|FOXP1|FRMPD4|GATA1|GIGYF2|GINS4|GLI3|GNPTAB|GOLGA3|GRIA1|GTF2I|GTPBP10|H2AFV|HDAC9|HEATR1|HIST1H2BG|HOOK1|IG…	10532/41905 genes: 25.13%
Molecular Function	2	ion binding	GO:0043167	2.64e-24	1.36e-20	117	ABCA7|ABCG2|ACBD4|ACHE|ACTR2|ADAMTS5|ADAMTS8|AGAP1|AKT2|ALPI|ANKK1|ARFIP1|ARSH|BNC2|CCBE1|CCDC88A|CDH23|CDH8|CDK6|CNOT6L|CRACR2B|CSAD|DAPK2|DNAJC21|DNMT3A|ELAC1|ERBB4|ERCC6L2|FBXO40|FGD4|FIGNL1|FMO1|FOXP1|FRMPD4|GATA1|GLI3|GNPTAB|GTPBP10|HDAC9|ITGAV|KATNAL1|KIF1B|KIF27|LIMS1|LIN28B|LONRF2|LPAR4|MAN1A2|MRE11|MSH3|MSH5|MYLK3|MYO7A|N4BP2|NEK2|NF1|NR1D2|OVOL1|PADI1|PCDHAC1|PDPK1|PEG3|PHF6|PIK3C2A|POL…	5876/41905 genes: 14.02%
Molecular Function	3	cation binding	GO:0043169	5.73e-18	2.97e-14	84	ACHE|ADAMTS5|ADAMTS8|AGAP1|ALPI|ARSH|BNC2|CCBE1|CDH23|CDH8|CNOT6L|CRACR2B|DNAJC21|DNMT3A|ELAC1|FBXO40|FGD4|FIGNL1|FOXP1|GATA1|GLI3|GNPTAB|GTPBP10|HDAC9|ITGAV|LIMS1|LIN28B|LONRF2|MAN1A2|MRE11|NEK2|NF1|NR1D2|OVOL1|PADI1|PCDHAC1|PEG3|PHF6|POLK|PRKCE|RAD18|REST|RNF183|RPAIN|RUFY2|S100A3|SMAD1|SP4|SUV39H2|THAP9|TRIM14|TRIM52|USP45|ZBTB33|ZCCHC2|ZDBF2|ZFP62|ZGRF1|ZNF114|ZNF121|ZNF175|ZNF208|ZNF268|ZNF2…	4036/41905 genes: 9.63%
Molecular Function	4	metal ion binding	GO:0046872	2.76e-17	1.43e-13	82	ADAMTS5|ADAMTS8|AGAP1|ALPI|ARSH|BNC2|CCBE1|CDH23|CDH8|CNOT6L|CRACR2B|DNAJC21|DNMT3A|ELAC1|FBXO40|FGD4|FIGNL1|FOXP1|GATA1|GLI3|GNPTAB|GTPBP10|HDAC9|ITGAV|LIMS1|LIN28B|LONRF2|MAN1A2|MRE11|NEK2|NR1D2|OVOL1|PADI1|PCDHAC1|PEG3|PHF6|POLK|PRKCE|RAD18|REST|RNF183|RPAIN|RUFY2|S100A3|SMAD1|SP4|SUV39H2|THAP9|TRIM14|TRIM52|USP45|ZBTB33|ZCCHC2|ZDBF2|ZFP62|ZGRF1|ZNF114|ZNF121|ZNF175|ZNF208|ZNF268|ZNF277|ZNF326…	3976/41905 genes: 9.49%
Molecular Function	2	heterocyclic compound binding	GO:1901363	1.28e-16	6.62e-13	92	ABCA7|ABCG2|ACTR2|AGAP1|AKT2|ANKK1|BNC2|CARF|CDK6|CSAD|DAPK2|DHFR2|DLX1|DNMT3A|ERBB4|ERCC6L2|ETV1|FIGNL1|FMO1|FOXP1|GATA1|GLI3|GTPBP10|HIST1H2BG|KATNAL1|KIF1B|KIF27|LIN28B|MAF|MRE11|MSH3|MSH5|MYLK3|MYO7A|N4BP2|NANOG|NEK2|NFAT5|NOP10|NR1D2|OVOL1|PABPC5|PDPK1|PEG3|PHF6|PIK3C2A|PNPT1|POLK|PRKCE|PRKX|RAB27A|RABL3|RAD18|RERG|REST|RPL35|SCAF1|SMAD1|SMC5|SOX17|SOX6|SP4|SUV39H2|TEAD1|THAP9|TNF|ZBTB33|ZCC…	4950/41905 genes: 11.81%
Molecular Function	2	organic cyclic compound binding	GO:0097159	2.94e-16	1.52e-12	92	ABCA7|ABCG2|ACTR2|AGAP1|AKT2|ANKK1|BNC2|CARF|CDK6|CSAD|DAPK2|DHFR2|DLX1|DNMT3A|ERBB4|ERCC6L2|ETV1|FIGNL1|FMO1|FOXP1|GATA1|GLI3|GTPBP10|HIST1H2BG|KATNAL1|KIF1B|KIF27|LIN28B|MAF|MRE11|MSH3|MSH5|MYLK3|MYO7A|N4BP2|NANOG|NEK2|NFAT5|NOP10|NR1D2|OVOL1|PABPC5|PDPK1|PEG3|PHF6|PIK3C2A|PNPT1|POLK|PRKCE|PRKX|RAB27A|RABL3|RAD18|RERG|REST|RPL35|SCAF1|SMAD1|SMC5|SOX17|SOX6|SP4|SUV39H2|TEAD1|THAP9|TNF|ZBTB33|ZCC…	5016/41905 genes: 11.97%
Molecular Function	3	nucleic acid binding	GO:0003676	1.58e-14	8.17e-11	64	BNC2|CARF|DHFR2|DLX1|DNMT3A|ERBB4|ERCC6L2|ETV1|FOXP1|GATA1|GLI3|HIST1H2BG|LIN28B|MAF|MRE11|MSH3|NANOG|NFAT5|NOP10|NR1D2|OVOL1|PABPC5|PEG3|PHF6|PNPT1|POLK|RAD18|REST|RPL35|SCAF1|SMAD1|SOX17|SOX6|SP4|SUV39H2|TEAD1|THAP9|TNF|ZBTB33|ZCCHC2|ZDBF2|ZFP62|ZNF121|ZNF175|ZNF208|ZNF268|ZNF326|ZNF33A|ZNF33B|ZNF345|ZNF354B|ZNF426|ZNF470|ZNF507|ZNF528|ZNF566|ZNF655|ZNF671|ZNF765|ZNF800|ZNF83|ZNF836|ZNF850|ZNF8…	2935/41905 genes: 7.00%
Molecular Function	4	DNA binding	GO:0003677	5.98e-14	3.1e-10	53	BNC2|CARF|DLX1|DNMT3A|ERBB4|ERCC6L2|ETV1|FOXP1|GATA1|GLI3|HIST1H2BG|LIN28B|MAF|MRE11|MSH3|NANOG|NFAT5|NR1D2|OVOL1|PHF6|POLK|RAD18|REST|SMAD1|SOX17|SOX6|SP4|SUV39H2|TEAD1|THAP9|TNF|ZBTB33|ZNF121|ZNF175|ZNF208|ZNF268|ZNF326|ZNF33A|ZNF33B|ZNF345|ZNF354B|ZNF426|ZNF470|ZNF507|ZNF528|ZNF566|ZNF655|ZNF671|ZNF765|ZNF800|ZNF83|ZNF836|ZNF850	2176/41905 genes: 5.19%
Molecular Function	3	protein complex binding	GO:0032403	1.15e-07	0.000594	20	ACHE|ACTR2|ADAMTS5|ADAMTS8|ADM2|CCBE1|FCGR1A|FCGR1B|IGF1|LZTFL1|MYO7A|PDCL|PDPK1|PIK3R1|RAD18|RPAIN|SHTN1|SKAP1|WASF1|ZNF326	635/41905 genes: 1.52%
Molecular Function	2	macromolecular complex binding	GO:0044877	2.02e-07	0.00105	22	ACHE|ACTR2|ADAMTS5|ADAMTS8|ADM2|CCBE1|FCGR1A|FCGR1B|IGF1|LZTFL1|MYO7A|NAA16|PDCL|PDPK1|PHF6|PIK3R1|RAD18|RPAIN|SHTN1|SKAP1|WASF1|ZNF326	786/41905 genes: 1.88%

## Sheet: CTD_GO_CC
Ontology	Highest GO Level	GO Term Name	GO Term ID	P-value	Corrected P-value	Annotated Genes Quantity	Annotated Genes	Genome Frequency
Cellular Component	1	cell part	GO:0044464	1.26e-49	6.53e-46	246	ABCA7|ABCG2|ACHE|ACTR2|ADAMTS5|ADAMTSL4|AGAP1|AKT2|ALPI|ANKRD11|ARFIP1|ARSH|ASAH2|B4GALNT4|BNC2|BOD1L1|BRDT|BRWD1|CACYBP|CARF|CCDC88A|CCND2|CD3D|CD55|CD68|CDH23|CDH8|CDK6|CEP126|CEP19|CHM|CHST5|CLDN25|CLEC4G|CNOT6L|CR1|CRACR2B|DAPK2|DBNDD2|DBT|DDTL|DHFR2|DLX1|DMTF1|DNAJC21|DNMT3A|ELAC1|EOGT|EPS8L3|ERBB4|ERCC6L2|FAM92A|FBXO40|FBXW8|FCGR1A|FCGR1B|FGD4|FIGNL1|FIP1L1|FLRT3|FMO1|FMOD|FOXN3|FOXP1|FRMPD…	15411/41905 genes: 36.78%
Cellular Component	1	cell	GO:0005623	1.79e-49	9.25e-46	246	ABCA7|ABCG2|ACHE|ACTR2|ADAMTS5|ADAMTSL4|AGAP1|AKT2|ALPI|ANKRD11|ARFIP1|ARSH|ASAH2|B4GALNT4|BNC2|BOD1L1|BRDT|BRWD1|CACYBP|CARF|CCDC88A|CCND2|CD3D|CD55|CD68|CDH23|CDH8|CDK6|CEP126|CEP19|CHM|CHST5|CLDN25|CLEC4G|CNOT6L|CR1|CRACR2B|DAPK2|DBNDD2|DBT|DDTL|DHFR2|DLX1|DMTF1|DNAJC21|DNMT3A|ELAC1|EOGT|EPS8L3|ERBB4|ERCC6L2|FAM92A|FBXO40|FBXW8|FCGR1A|FCGR1B|FGD4|FIGNL1|FIP1L1|FLRT3|FMO1|FMOD|FOXN3|FOXP1|FRMPD…	15437/41905 genes: 36.84%
Cellular Component	2	intracellular	GO:0005622	1.78e-40	9.24e-37	217	ABCA7|ABCG2|ACHE|ACTR2|ADAMTS5|ADAMTSL4|AGAP1|AKT2|ANKRD11|ARFIP1|ARSH|ASAH2|B4GALNT4|BNC2|BOD1L1|BRDT|BRWD1|CACYBP|CARF|CCDC88A|CCND2|CD3D|CD55|CD68|CDK6|CEP126|CEP19|CHM|CHST5|CNOT6L|CR1|CRACR2B|DAPK2|DBNDD2|DBT|DDTL|DHFR2|DLX1|DMTF1|DNAJC21|DNMT3A|ELAC1|EOGT|EPS8L3|ERBB4|ERCC6L2|FAM92A|FBXO40|FBXW8|FCGR1A|FCGR1B|FGD4|FIGNL1|FIP1L1|FLRT3|FMO1|FMOD|FOXN3|FOXP1|FRMPD4|GATA1|GIGYF2|GINS4|GLI3|GNPT…	13366/41905 genes: 31.90%
Cellular Component	2	intracellular part	GO:0044424	1.75e-37	9.06e-34	210	ABCA7|ABCG2|ACHE|ACTR2|ADAMTS5|ADAMTSL4|AGAP1|AKT2|ANKRD11|ARFIP1|ARSH|ASAH2|B4GALNT4|BNC2|BOD1L1|BRDT|BRWD1|CACYBP|CARF|CCDC88A|CCND2|CD3D|CD55|CD68|CDK6|CEP126|CEP19|CHM|CHST5|CNOT6L|CR1|CRACR2B|DAPK2|DBNDD2|DBT|DDTL|DHFR2|DLX1|DMTF1|DNAJC21|DNMT3A|ELAC1|EOGT|EPS8L3|ERBB4|ERCC6L2|FAM92A|FBXO40|FBXW8|FCGR1A|FCGR1B|FGD4|FIGNL1|FIP1L1|FLRT3|FMO1|FMOD|FOXN3|FOXP1|FRMPD4|GATA1|GIGYF2|GINS4|GLI3|GNPT…	13079/41905 genes: 31.21%
Cellular Component	1	organelle	GO:0043226	1.81e-33	9.39e-30	198	ABCA7|ABCG2|ACHE|ACTR2|ADAMTS5|ADAMTSL4|AKT2|ANKRD11|ARFIP1|ARSH|ASAH2|B4GALNT4|BNC2|BOD1L1|BRDT|BRWD1|C1ORF68|CACYBP|CARF|CCDC88A|CCND2|CD3D|CD55|CD68|CDH23|CDK6|CEP126|CEP19|CHST5|CNOT6L|CR1|DAPK2|DBT|DDTL|DHFR2|DLX1|DMTF1|DNAJB3|DNAJC21|DNMT3A|ELAC1|EOGT|ERBB4|ERCC6L2|FAM92A|FBXW8|FCGR1A|FCGR1B|FGD4|FIGNL1|FIP1L1|FLRT3|FMO1|FMOD|FOXN3|FOXP1|FRMPD4|GATA1|GIGYF2|GINS4|GLI3|GNPTAB|GOLGA3|GRIA1|GT…	12439/41905 genes: 29.68%
Cellular Component	2	intracellular organelle	GO:0043229	1.12e-30	5.82e-27	184	ABCA7|ABCG2|ACHE|ACTR2|ADAMTS5|ADAMTSL4|AKT2|ANKRD11|ARFIP1|ARSH|ASAH2|B4GALNT4|BNC2|BOD1L1|BRDT|BRWD1|CACYBP|CARF|CCDC88A|CCND2|CD3D|CD55|CD68|CDK6|CEP126|CEP19|CHST5|CNOT6L|CR1|DAPK2|DBT|DHFR2|DLX1|DMTF1|DNAJC21|DNMT3A|ELAC1|EOGT|ERBB4|ERCC6L2|FAM92A|FBXW8|FCGR1A|FCGR1B|FGD4|FIGNL1|FIP1L1|FLRT3|FMO1|FMOD|FOXN3|FOXP1|FRMPD4|GATA1|GIGYF2|GINS4|GLI3|GNPTAB|GOLGA3|GRIA1|GTF2I|GTPBP10|H2AFV|HDAC9|HE…	11400/41905 genes: 27.20%
Cellular Component	2	membrane-bounded organelle	GO:0043227	7.27e-29	3.77e-25	182	ABCA7|ABCG2|ACHE|ACTR2|ADAMTS5|ADAMTSL4|AKT2|ANKRD11|ARFIP1|ARSH|ASAH2|B4GALNT4|BNC2|BOD1L1|BRDT|BRWD1|C1ORF68|CACYBP|CARF|CCDC88A|CCND2|CD3D|CD55|CD68|CDK6|CHST5|CNOT6L|CR1|DAPK2|DBT|DDTL|DHFR2|DLX1|DMTF1|DNAJB3|DNAJC21|DNMT3A|ELAC1|EOGT|ERBB4|ERCC6L2|FBXW8|FCGR1A|FCGR1B|FGD4|FIGNL1|FIP1L1|FLRT3|FMO1|FMOD|FOXN3|FOXP1|GATA1|GIGYF2|GINS4|GLI3|GNPTAB|GOLGA3|GRIA1|GTF2I|GTPBP10|H2AFV|HDAC9|HEATR1|HI…	11535/41905 genes: 27.53%
Cellular Component	3	intracellular membrane-bounded organelle	GO:0043231	8.54e-24	4.42e-20	156	ABCA7|ABCG2|ACHE|ACTR2|ADAMTS5|ADAMTSL4|AKT2|ANKRD11|ARFIP1|ARSH|ASAH2|B4GALNT4|BNC2|BOD1L1|BRDT|BRWD1|CACYBP|CARF|CCDC88A|CCND2|CD55|CD68|CDK6|CHST5|CNOT6L|DAPK2|DBT|DHFR2|DLX1|DMTF1|DNAJC21|DNMT3A|ELAC1|EOGT|ERBB4|ERCC6L2|FBXW8|FGD4|FIGNL1|FIP1L1|FLRT3|FMO1|FMOD|FOXN3|FOXP1|GATA1|GIGYF2|GINS4|GLI3|GNPTAB|GOLGA3|GRIA1|GTF2I|GTPBP10|H2AFV|HDAC9|HEATR1|HIST1H2BG|INTS6|INTS8|KIF1B|KRR1|LGALS14|LIN2…	9757/41905 genes: 23.28%
Cellular Component	3	cytoplasm	GO:0005737	1.21e-21	6.25e-18	158	ABCA7|ABCG2|ACHE|ACTR2|ADAMTS5|ADAMTSL4|AGAP1|AKT2|ANKRD11|ARFIP1|ARSH|ASAH2|B4GALNT4|BNC2|BRWD1|CACYBP|CCDC88A|CCND2|CD3D|CD55|CD68|CDK6|CEP126|CEP19|CHM|CHST5|CNOT6L|CR1|CRACR2B|DAPK2|DBNDD2|DBT|DDTL|DHFR2|DMTF1|DNAJC21|DNMT3A|ELAC1|EOGT|EPS8L3|ERBB4|ERCC6L2|FAM92A|FBXO40|FBXW8|FCGR1A|FCGR1B|FGD4|FIGNL1|FLRT3|FMO1|FMOD|GIGYF2|GINS4|GLI3|GNPTAB|GOLGA3|GRIA1|GTPBP10|HDAC9|HEATR1|HIST1H2BG|HOOK1|I…	10435/41905 genes: 24.90%
Cellular Component	4	nucleus	GO:0005634	2.48e-19	1.28e-15	114	ABCG2|ACHE|AKT2|ANKRD11|BNC2|BOD1L1|BRDT|BRWD1|CACYBP|CARF|CCND2|CDK6|CNOT6L|DLX1|DMTF1|DNAJC21|DNMT3A|ELAC1|ERBB4|ERCC6L2|FIGNL1|FIP1L1|FOXN3|FOXP1|GATA1|GINS4|GLI3|GOLGA3|GTF2I|GTPBP10|H2AFV|HDAC9|HEATR1|HIST1H2BG|INTS6|INTS8|KRR1|LGALS14|LIN28B|MACC1|MAP2|MRE11|MSH3|NAA16|NANOG|NEK2|NF1|NFAT5|NOM1|NOP10|NR1D2|PADI1|PARP9|PDPK1|PHF6|PIK3C2A|PIK3R1|PNPT1|POLK|PRKCE|PRKX|RAD18|RERG|REST|RPAIN|RPL…	6462/41905 genes: 15.42%
Cellular Component	1	organelle part	GO:0044422	3.72e-16	1.93e-12	128	ABCA7|ABCG2|ACTR2|ADAMTS5|ADAMTSL4|AKT2|ANKRD11|ARFIP1|ARSH|B4GALNT4|BOD1L1|BRWD1|CACYBP|CARF|CCDC88A|CCND2|CD3D|CD55|CD68|CDH23|CDK6|CEP126|CEP19|CHST5|CR1|DAPK2|DBT|DHFR2|DMTF1|DNAJC21|DNMT3A|EOGT|ERBB4|ERCC6L2|FAM92A|FCGR1A|FCGR1B|FIGNL1|FIP1L1|FLRT3|FMO1|FMOD|FOXP1|GATA1|GINS4|GLI3|GNPTAB|GOLGA3|GRIA1|GTF2I|GTPBP10|H2AFV|HDAC9|HEATR1|HIST1H2BG|HOOK1|IGF1|INTS6|INTS8|ITGAV|KATNAL1|KIF1B|KIF27|…	8535/41905 genes: 20.37%
Cellular Component	2	intracellular organelle part	GO:0044446	3.84e-16	1.99e-12	126	ABCA7|ABCG2|ACTR2|ADAMTS5|ADAMTSL4|AKT2|ANKRD11|ARFIP1|ARSH|B4GALNT4|BOD1L1|BRWD1|CACYBP|CARF|CCDC88A|CCND2|CD3D|CD55|CD68|CDK6|CEP126|CEP19|CHST5|CR1|DAPK2|DBT|DHFR2|DMTF1|DNAJC21|DNMT3A|EOGT|ERBB4|ERCC6L2|FAM92A|FCGR1A|FCGR1B|FIGNL1|FIP1L1|FLRT3|FMO1|FMOD|FOXP1|GATA1|GINS4|GLI3|GNPTAB|GOLGA3|GRIA1|GTF2I|GTPBP10|H2AFV|HDAC9|HEATR1|HIST1H2BG|HOOK1|IGF1|INTS6|INTS8|ITGAV|KATNAL1|KIF1B|KIF27|KRR1|K…	8331/41905 genes: 19.88%
Cellular Component	3	cytoplasmic part	GO:0044444	6.68e-14	3.46e-10	125	ABCA7|ABCG2|ACHE|ACTR2|ADAMTS5|ADAMTSL4|AKT2|ANKRD11|ARFIP1|ARSH|ASAH2|B4GALNT4|BNC2|BRWD1|CACYBP|CCDC88A|CCND2|CD3D|CD55|CD68|CDK6|CEP19|CHM|CHST5|CNOT6L|CR1|DAPK2|DBT|DHFR2|DMTF1|DNAJC21|ELAC1|EOGT|ERBB4|ERCC6L2|FAM92A|FBXO40|FBXW8|FCGR1A|FCGR1B|FGD4|FLRT3|FMO1|FMOD|GIGYF2|GLI3|GNPTAB|GOLGA3|GRIA1|GTPBP10|HEATR1|HIST1H2BG|HOOK1|IGF1|ILDR1|INHBB|IPCEF1|ITGAV|KIF1B|KLK5|KRT38|KRTAP5-10|KRTAP5-11|…	8795/41905 genes: 20.99%
Cellular Component	3	intracellular organelle lumen	GO:0070013	2.31e-12	1.2e-08	81	ACTR2|ADAMTS5|ADAMTSL4|AKT2|ANKRD11|ARSH|BOD1L1|BRWD1|CACYBP|CARF|CCND2|CDK6|DAPK2|DBT|DHFR2|DMTF1|DNAJC21|DNMT3A|EOGT|ERBB4|FIGNL1|FIP1L1|FMO1|FMOD|FOXP1|GATA1|GINS4|GLI3|GOLGA3|GTF2I|GTPBP10|HDAC9|HEATR1|HIST1H2BG|IGF1|INTS6|INTS8|KRR1|LIN28B|MAP2|MRE11|MSH3|MUC4|MUC7|NANOG|NEK2|NF1|NFAT5|NOM1|NOP10|NR1D2|PABPC5|PADI1|PARP9|PDPK1|PHF6|PNPT1|POLK|RAB27A|RAD18|REST|RPAIN|RPL35|S100A3|SETD7|SGO1|S…	4785/41905 genes: 11.42%
Cellular Component	1	membrane-enclosed lumen	GO:0031974	2.31e-12	1.2e-08	81	ACTR2|ADAMTS5|ADAMTSL4|AKT2|ANKRD11|ARSH|BOD1L1|BRWD1|CACYBP|CARF|CCND2|CDK6|DAPK2|DBT|DHFR2|DMTF1|DNAJC21|DNMT3A|EOGT|ERBB4|FIGNL1|FIP1L1|FMO1|FMOD|FOXP1|GATA1|GINS4|GLI3|GOLGA3|GTF2I|GTPBP10|HDAC9|HEATR1|HIST1H2BG|IGF1|INTS6|INTS8|KRR1|LIN28B|MAP2|MRE11|MSH3|MUC4|MUC7|NANOG|NEK2|NF1|NFAT5|NOM1|NOP10|NR1D2|PABPC5|PADI1|PARP9|PDPK1|PHF6|PNPT1|POLK|RAB27A|RAD18|REST|RPAIN|RPL35|S100A3|SETD7|SGO1|S…	4785/41905 genes: 11.42%
Cellular Component	2	organelle lumen	GO:0043233	2.31e-12	1.2e-08	81	ACTR2|ADAMTS5|ADAMTSL4|AKT2|ANKRD11|ARSH|BOD1L1|BRWD1|CACYBP|CARF|CCND2|CDK6|DAPK2|DBT|DHFR2|DMTF1|DNAJC21|DNMT3A|EOGT|ERBB4|FIGNL1|FIP1L1|FMO1|FMOD|FOXP1|GATA1|GINS4|GLI3|GOLGA3|GTF2I|GTPBP10|HDAC9|HEATR1|HIST1H2BG|IGF1|INTS6|INTS8|KRR1|LIN28B|MAP2|MRE11|MSH3|MUC4|MUC7|NANOG|NEK2|NF1|NFAT5|NOM1|NOP10|NR1D2|PABPC5|PADI1|PARP9|PDPK1|PHF6|PNPT1|POLK|RAB27A|RAD18|REST|RPAIN|RPL35|S100A3|SETD7|SGO1|S…	4785/41905 genes: 11.42%
Cellular Component	3	intracellular non-membrane-bounded organelle	GO:0043232	2.02e-11	1.05e-07	67	ACTR2|BOD1L1|BRWD1|CARF|CCDC88A|CCND2|CDK6|CEP126|CEP19|DBT|DNAJC21|DNMT3A|ERCC6L2|FAM92A|FGD4|FIGNL1|FRMPD4|GIGYF2|GLI3|GOLGA3|GTPBP10|H2AFV|HEATR1|HIST1H2BG|HOOK1|INTS6|KATNAL1|KIF1B|KIF27|KRR1|KRT38|KRTAP5-10|KRTAP5-11|KRTAP5-2|KRTAP5-7|LIN28B|MAF|MAP2|MRE11|MYLK3|MYO7A|NANOG|NEK2|NF1|NME9|NOM1|NOP10|PHF6|PNPT1|PRKCE|RAD18|RPAIN|RPL35|S100A3|SDCCAG8|SETD7|SGO1|SHTN1|SMC5|SPG20|SUV39H2|TMEM67|W…	3713/41905 genes: 8.86%
Cellular Component	2	non-membrane-bounded organelle	GO:0043228	2.02e-11	1.05e-07	67	ACTR2|BOD1L1|BRWD1|CARF|CCDC88A|CCND2|CDK6|CEP126|CEP19|DBT|DNAJC21|DNMT3A|ERCC6L2|FAM92A|FGD4|FIGNL1|FRMPD4|GIGYF2|GLI3|GOLGA3|GTPBP10|H2AFV|HEATR1|HIST1H2BG|HOOK1|INTS6|KATNAL1|KIF1B|KIF27|KRR1|KRT38|KRTAP5-10|KRTAP5-11|KRTAP5-2|KRTAP5-7|LIN28B|MAF|MAP2|MRE11|MYLK3|MYO7A|NANOG|NEK2|NF1|NME9|NOM1|NOP10|PHF6|PNPT1|PRKCE|RAD18|RPAIN|RPL35|S100A3|SDCCAG8|SETD7|SGO1|SHTN1|SMC5|SPG20|SUV39H2|TMEM67|W…	3713/41905 genes: 8.86%
Cellular Component	4	nuclear lumen	GO:0031981	3.27e-10	1.7e-06	65	AKT2|ANKRD11|BOD1L1|BRWD1|CACYBP|CARF|CCND2|CDK6|DMTF1|DNAJC21|DNMT3A|ERBB4|FIGNL1|FIP1L1|FOXP1|GATA1|GINS4|GLI3|GOLGA3|GTF2I|GTPBP10|HDAC9|HEATR1|HIST1H2BG|INTS6|INTS8|KRR1|LIN28B|MAP2|MRE11|MSH3|NANOG|NEK2|NF1|NFAT5|NOM1|NOP10|NR1D2|PADI1|PARP9|PDPK1|PHF6|POLK|RAD18|REST|RPAIN|RPL35|S100A3|SETD7|SGO1|SMAD1|SMC5|SOX17|SOX6|SP4|SPG20|SUV39H2|TBXA2R|TEAD1|USP45|ZBTB33|ZNF175|ZNF326|ZNF470|ZNF655	3781/41905 genes: 9.02%
Cellular Component	1	membrane	GO:0016020	1.48e-09	7.68e-06	113	ABCA7|ABCG2|ACHE|ACTR2|AKT2|ALPI|ANKRD11|ARFIP1|ARSH|ASAH2|B4GALNT4|BEAN1|BNC2|BTNL10|CCDC88A|CCND2|CD3D|CD55|CD68|CDH23|CDH8|CHST5|CLDN25|CLEC4G|CR1|DHFR2|ERBB4|FAM200A|FCGR1A|FCGR1B|FLRT3|FMO1|GABRA4|GGT5|GIGYF2|GNPTAB|GNRHR|GOLGA3|GRIA1|GTF2I|GXYLT1|HEATR1|HOOK1|IGF1|IL1RL1|IL9R|ILDR1|IPCEF1|ITGAV|KCNC1|KCTD12|KIF1B|KRR1|LIMS1|LPAR4|MAN1A2|MBOAT4|MPP5|MREG|MSH3|MUC4|MUC7|MYO7A|NEGR1|NF1|NIPAL1…	8801/41905 genes: 21.00%
Cellular Component	3	nuclear part	GO:0044428	7.06e-09	3.65e-05	65	AKT2|ANKRD11|BOD1L1|BRWD1|CACYBP|CARF|CCND2|CDK6|DMTF1|DNAJC21|DNMT3A|ERBB4|FIGNL1|FIP1L1|FOXP1|GATA1|GINS4|GLI3|GOLGA3|GTF2I|GTPBP10|HDAC9|HEATR1|HIST1H2BG|INTS6|INTS8|KRR1|LIN28B|MAP2|MRE11|MSH3|NANOG|NEK2|NF1|NFAT5|NOM1|NOP10|NR1D2|PADI1|PARP9|PDPK1|PHF6|POLK|RAD18|REST|RPAIN|RPL35|S100A3|SETD7|SGO1|SMAD1|SMC5|SOX17|SOX6|SP4|SPG20|SUV39H2|TBXA2R|TEAD1|USP45|ZBTB33|ZNF175|ZNF326|ZNF470|ZNF655	4083/41905 genes: 9.74%
Cellular Component	4	cytosol	GO:0005829	7.43e-09	3.85e-05	71	ACTR2|AKT2|ANKRD11|ARFIP1|BNC2|BRWD1|CACYBP|CCDC88A|CCND2|CDK6|CHM|CNOT6L|DMTF1|ELAC1|ERBB4|FBXO40|FBXW8|FGD4|GIGYF2|GLI3|GOLGA3|HIST1H2BG|HOOK1|ILDR1|IPCEF1|ITGAV|KLK5|KRT38|KRTAP5-10|KRTAP5-11|KRTAP5-2|KRTAP5-7|LIMS1|LIN28B|LZTFL1|MAP2|MRE11|MYLK3|MYO7A|N4BP2|NAA16|NEK2|NF1|NFAT5|PADI1|PARP9|PDCL|PDPK1|PIK3C2A|PIK3R1|PNPT1|PRKCE|RAB27A|RERG|REST|RGS5|RPL35|S100A3|SDCCAG8|SGO1|SIKE1|SKAP1|SMAD1|…	4661/41905 genes: 11.12%
Cellular Component	2	cell periphery	GO:0071944	9.67e-09	5.01e-05	74	ABCA7|ABCG2|ACHE|ACTR2|AKT2|ALPI|ANKRD11|ASAH2|BNC2|CCDC88A|CD3D|CD55|CD68|CDH23|CDH8|CLDN25|CLEC4G|CR1|ERBB4|FCGR1A|FCGR1B|FLRT3|GABRA4|GGT5|GNRHR|GRIA1|IGF1|IL1RL1|IL9R|ILDR1|INHBB|IPCEF1|ITGAV|KCNC1|KCTD12|LIMS1|LPAR4|MPP5|MREG|MUC4|MUC7|MYO7A|NEGR1|OR10A4|OR11G2|OR4D11|OR5AN1|OR5B21|OR6C65|PCDHAC1|PDPK1|PIK3C2A|PIK3R1|PKD1L1|PRKCE|RAB27A|SCIMP|SEMA5A|SERPINC1|SIRPB1|SKAP1|SLC16A7|SLC22A7|SPG2…	4984/41905 genes: 11.89%
Cellular Component	2	plasma membrane	GO:0005886	2.36e-08	0.000122	72	ABCA7|ABCG2|ACHE|AKT2|ALPI|ANKRD11|ASAH2|BNC2|CCDC88A|CD3D|CD55|CD68|CDH23|CDH8|CLDN25|CLEC4G|CR1|ERBB4|FCGR1A|FCGR1B|FLRT3|GABRA4|GGT5|GNRHR|GRIA1|IGF1|IL1RL1|IL9R|ILDR1|IPCEF1|ITGAV|KCNC1|KCTD12|LIMS1|LPAR4|MPP5|MREG|MUC4|MUC7|MYO7A|NEGR1|OR10A4|OR11G2|OR4D11|OR5AN1|OR5B21|OR6C65|PCDHAC1|PDPK1|PIK3C2A|PIK3R1|PKD1L1|PRKCE|RAB27A|SCIMP|SEMA5A|SERPINC1|SIRPB1|SKAP1|SLC16A7|SLC22A7|SPG20|TACSTD2|TB…	4893/41905 genes: 11.68%
Cellular Component	4	nucleoplasm	GO:0005654	3.82e-08	0.000198	54	AKT2|ANKRD11|BOD1L1|BRWD1|CACYBP|CARF|CCND2|CDK6|DMTF1|DNMT3A|ERBB4|FIP1L1|FOXP1|GATA1|GINS4|GLI3|GOLGA3|GTF2I|HDAC9|HEATR1|HIST1H2BG|INTS6|INTS8|KRR1|MRE11|MSH3|NANOG|NEK2|NFAT5|NOP10|NR1D2|PADI1|PARP9|PDPK1|PHF6|POLK|RAD18|REST|RPAIN|SETD7|SMAD1|SMC5|SOX17|SOX6|SP4|SPG20|SUV39H2|TBXA2R|TEAD1|USP45|ZBTB33|ZNF175|ZNF326|ZNF470	3238/41905 genes: 7.73%
Cellular Component	1	membrane part	GO:0044425	4.35e-07	0.00225	78	ABCA7|ABCG2|ACHE|AKT2|ALPI|ARSH|ASAH2|B4GALNT4|BEAN1|BTNL10|CD3D|CD55|CD68|CDH23|CDH8|CHST5|CLDN25|CLEC4G|CR1|ERBB4|FAM200A|FCGR1A|FCGR1B|FLRT3|FMO1|GABRA4|GGT5|GIGYF2|GNPTAB|GNRHR|GOLGA3|GRIA1|GXYLT1|HOOK1|IGF1|IL1RL1|IL9R|ILDR1|ITGAV|KCNC1|KCTD12|MAN1A2|MBOAT4|MREG|MUC4|MYO7A|NEGR1|NIPAL1|OR5AN1|OR5B21|OR6C65|PCDHAC1|PGAP1|PIK3R1|PKD1L1|PNPT1|RAB27A|RNF183|SCIMP|SIRPB1|SKAP1|SLC16A7|SLC22A7|SLC…	5889/41905 genes: 14.05%
Cellular Component	4	nucleolus	GO:0005730	9.42e-07	0.00487	22	BRWD1|CARF|CCND2|DNAJC21|GOLGA3|GTPBP10|HEATR1|KRR1|LIN28B|MAP2|NANOG|NEK2|NF1|NOM1|NOP10|PHF6|RPAIN|RPL35|S100A3|SETD7|ZBTB33|ZNF655	862/41905 genes: 2.06%
Cellular Component	2	intrinsic component of membrane	GO:0031224	1e-06	0.00519	66	ABCA7|ABCG2|ACHE|ALPI|ARSH|ASAH2|B4GALNT4|BEAN1|BTNL10|CD3D|CD55|CD68|CDH23|CDH8|CHST5|CLDN25|CLEC4G|CR1|ERBB4|FAM200A|FCGR1A|FCGR1B|FLRT3|FMO1|GABRA4|GGT5|GIGYF2|GNPTAB|GNRHR|GRIA1|GXYLT1|IL1RL1|IL9R|ILDR1|ITGAV|KCNC1|MAN1A2|MBOAT4|MUC4|NEGR1|NIPAL1|OR5AN1|OR5B21|OR6C65|PCDHAC1|PGAP1|PKD1L1|RNF183|SCIMP|SIRPB1|SLC16A7|SLC22A7|SLC25A48|SMAD1|SPEM1|SYNJ2BP|TACSTD2|TBXA2R|TCIRG1|TMEM185A|TMEM249|TM…	4773/41905 genes: 11.39%
Cellular Component	3	integral component of membrane	GO:0016021	1.81e-06	0.00938	64	ABCA7|ABCG2|ALPI|ARSH|ASAH2|B4GALNT4|BEAN1|BTNL10|CD3D|CD55|CD68|CDH23|CDH8|CHST5|CLDN25|CLEC4G|CR1|ERBB4|FAM200A|FCGR1A|FCGR1B|FLRT3|FMO1|GABRA4|GGT5|GIGYF2|GNPTAB|GNRHR|GRIA1|GXYLT1|IL1RL1|IL9R|ILDR1|ITGAV|KCNC1|MAN1A2|MBOAT4|MUC4|NIPAL1|OR5AN1|OR5B21|OR6C65|PCDHAC1|PGAP1|PKD1L1|RNF183|SCIMP|SIRPB1|SLC16A7|SLC22A7|SLC25A48|SMAD1|SPEM1|SYNJ2BP|TACSTD2|TBXA2R|TCIRG1|TMEM185A|TMEM249|TMEM67|TMX4|T…	4652/41905 genes: 11.10%

## Sheet: CTD_GO_BP
Ontology	Highest GO Level	GO Term Name	GO Term ID	P-value	Corrected P-value	Annotated Genes Quantity	Annotated Genes	Genome Frequency
Biological Process	1	cellular process	GO:0009987	1.18e-46	6.09e-43	233	ABCA7|ABCG2|ACHE|ACTR2|ADAMTS5|ADAMTS8|ADAMTSL4|ADM2|AGAP1|AKT2|ALPI|ANGPTL4|ANKK1|ARFIP1|ARSH|ASAH2|BANK1|BNC2|BOD1L1|BRDT|BRWD1|CACYBP|CARF|CCBE1|CCDC88A|CCND2|CD3D|CD55|CD68|CDH23|CDH8|CDK6|CEP126|CHM|CHST5|CLEC4G|CNOT6L|CR1|CRLF1|CSAD|DAPK2|DBNDD2|DBT|DHFR2|DLX1|DMTF1|DNAJC21|DNMT3A|ELAC1|EOGT|ERBB4|ERCC6L2|ETV1|FAM200A|FAM92A|FBXO40|FBXW8|FCGR1A|FCGR1B|FGD4|FIGNL1|FIP1L1|FLRT3|FMO1|FMOD|FOXN…	14242/41905 genes: 33.99%
Biological Process	3	macromolecule metabolic process	GO:0043170	7.61e-33	3.94e-29	160	ABCA7|ACHE|ADAMTS5|ADAMTS8|ADAMTSL4|ADM2|AKT2|ALPI|ANKK1|APOC4|ARSH|BANK1|BNC2|BOD1L1|BRDT|BRWD1|C20ORF173|CACYBP|CARF|CCBE1|CCDC88A|CCND2|CD3D|CD55|CDK6|CHM|CHST5|CNOT6L|CR1|CRLF1|DAPK2|DBNDD2|DLX1|DMTF1|DNMT3A|ELAC1|EOGT|ERBB4|ERCC6L2|ETV1|FAM200A|FBXO40|FBXW8|FIGNL1|FIP1L1|FMOD|FOXN3|FOXP1|GATA1|GGT5|GIGYF2|GINS4|GLI3|GNPTAB|GRIA1|GTF2I|GXYLT1|HDAC9|HEATR1|HIST1H2BG|IGF1|INHBB|INTS6|INTS8|ITGA…	8514/41905 genes: 20.32%
Biological Process	3	cellular macromolecule metabolic process	GO:0044260	1.28e-30	6.62e-27	149	ABCA7|ACHE|ADAMTS5|ADAMTSL4|ADM2|AKT2|ALPI|ANKK1|ARSH|BANK1|BNC2|BOD1L1|BRDT|BRWD1|CACYBP|CARF|CCBE1|CCDC88A|CCND2|CD3D|CD55|CDK6|CHM|CHST5|CNOT6L|CR1|CRLF1|DAPK2|DBNDD2|DLX1|DMTF1|DNMT3A|ELAC1|EOGT|ERBB4|ERCC6L2|ETV1|FAM200A|FBXO40|FBXW8|FIGNL1|FIP1L1|FOXN3|FOXP1|GATA1|GIGYF2|GINS4|GLI3|GNPTAB|GRIA1|GTF2I|GXYLT1|HDAC9|HEATR1|HIST1H2BG|IGF1|INTS6|INTS8|ITGAV|ITIH2|KRR1|LIMS1|LIN28B|MACC1|MAF|MAN1…	7810/41905 genes: 18.64%
Biological Process	2	organic substance metabolic process	GO:0071704	3.5e-29	1.81e-25	169	ABCA7|ABCG2|ACHE|ADAMTS5|ADAMTS8|ADAMTSL4|ADM2|AKT2|ALPI|ANKK1|APOC4|ARSH|ASAH2|BANK1|BNC2|BOD1L1|BRDT|BRWD1|C20ORF173|CACYBP|CARF|CCBE1|CCDC88A|CCND2|CD3D|CD55|CDK6|CHM|CHST5|CNOT6L|CR1|CRLF1|CSAD|DAPK2|DBNDD2|DBT|DHFR2|DLX1|DMTF1|DNMT3A|ELAC1|EOGT|ERBB4|ERCC6L2|ETV1|FAM200A|FBXO40|FBXW8|FIGNL1|FIP1L1|FMO1|FMOD|FOXN3|FOXP1|GATA1|GGT5|GIGYF2|GINS4|GLI3|GNPTAB|GRIA1|GTF2I|GXYLT1|HDAC9|HEATR1|HIST1…	10066/41905 genes: 24.02%
Biological Process	1	single-organism process	GO:0044699	4.19e-29	2.17e-25	189	ABCA7|ABCG2|ACHE|ACTR2|ADAMTS5|ADAMTS8|ADAMTSL4|ADM2|AGAP1|AKT2|ALPI|ANGPTL4|ANKRD11|APOC4|ARFIP1|ARSH|ASAH2|BANK1|BNC2|BRDT|BRWD1|CACYBP|CCBE1|CCDC88A|CCND2|CD3D|CD55|CD68|CDH23|CDH8|CDK6|CEP126|CHM|CHST5|CLEC4G|CNOT6L|CR1|CRLF1|CSAD|DAPK2|DBT|DEFB126|DHFR2|DLX1|DMTF1|DNMT3A|EOGT|ERBB4|ETV1|FAM92A|FBXO40|FBXW8|FCGR1A|FCGR1B|FGD4|FIGNL1|FLRT3|FMO1|FMOD|FOXN3|FOXP1|FRMPD4|GAB3|GABRA4|GATA1|GGT5|GI…	12275/41905 genes: 29.29%
Biological Process	2	cellular metabolic process	GO:0044237	4.86e-29	2.52e-25	164	ABCA7|ABCG2|ACHE|ADAMTS5|ADAMTSL4|ADM2|AKT2|ALPI|ANKK1|ARSH|ASAH2|BANK1|BNC2|BOD1L1|BRDT|BRWD1|CACYBP|CARF|CCBE1|CCDC88A|CCND2|CD3D|CD55|CDK6|CHM|CHST5|CNOT6L|CR1|CRLF1|CSAD|DAPK2|DBNDD2|DBT|DHFR2|DLX1|DMTF1|DNMT3A|ELAC1|EOGT|ERBB4|ERCC6L2|ETV1|FAM200A|FBXO40|FBXW8|FIGNL1|FIP1L1|FMO1|FMOD|FOXN3|FOXP1|GATA1|GGT5|GIGYF2|GINS4|GLI3|GNPTAB|GRIA1|GTF2I|GXYLT1|HDAC9|HEATR1|HIST1H2BG|IGF1|INHBB|INTS6|IN…	9571/41905 genes: 22.84%
Biological Process	1	metabolic process	GO:0008152	2.02e-28	1.04e-24	171	ABCA7|ABCG2|ACHE|ADAMTS5|ADAMTS8|ADAMTSL4|ADM2|AKT2|ALPI|ANKK1|APOC4|ARSH|ASAH2|BANK1|BNC2|BOD1L1|BRDT|BRWD1|C20ORF173|CACYBP|CARF|CCBE1|CCDC88A|CCND2|CD3D|CD55|CDK6|CHM|CHST5|CNOT6L|CR1|CRLF1|CSAD|DAPK2|DBNDD2|DBT|DHFR2|DLX1|DMTF1|DNMT3A|ELAC1|EOGT|ERBB4|ERCC6L2|ETV1|FAM200A|FBXO40|FBXW8|FIGNL1|FIP1L1|FMO1|FMOD|FOXN3|FOXP1|GATA1|GGT5|GIGYF2|GINS4|GLI3|GNPTAB|GRIA1|GTF2I|GXYLT1|HDAC9|HEATR1|HIST1…	10423/41905 genes: 24.87%
Biological Process	2	primary metabolic process	GO:0044238	7.28e-28	3.77e-24	163	ABCA7|ACHE|ADAMTS5|ADAMTS8|ADAMTSL4|ADM2|AKT2|ALPI|ANKK1|APOC4|ARSH|ASAH2|BANK1|BNC2|BOD1L1|BRDT|BRWD1|CACYBP|CARF|CCBE1|CCDC88A|CCND2|CD3D|CD55|CDK6|CHM|CHST5|CNOT6L|CR1|CRLF1|DAPK2|DBNDD2|DBT|DHFR2|DLX1|DMTF1|DNMT3A|ELAC1|EOGT|ERBB4|ERCC6L2|ETV1|FAM200A|FBXO40|FBXW8|FIGNL1|FIP1L1|FMO1|FOXN3|FOXP1|GATA1|GGT5|GIGYF2|GINS4|GLI3|GNPTAB|GTF2I|GXYLT1|HDAC9|HEATR1|HIST1H2BG|IGF1|INHBB|INTS6|INTS8|ITGA…	9686/41905 genes: 23.11%
Biological Process	4	macromolecule biosynthetic process	GO:0009059	1.97e-26	1.02e-22	110	ABCA7|ACHE|ADAMTS5|ADAMTSL4|AKT2|ALPI|BANK1|BNC2|BOD1L1|BRDT|BRWD1|CACYBP|CARF|CCDC88A|CD3D|CDK6|CHST5|CNOT6L|DLX1|DMTF1|DNMT3A|EOGT|ERBB4|ETV1|FAM200A|FIP1L1|FMOD|FOXN3|FOXP1|GATA1|GIGYF2|GINS4|GLI3|GNPTAB|GTF2I|GXYLT1|HDAC9|IGF1|INHBB|INTS6|INTS8|ITGAV|LIMS1|LIN28B|MACC1|MAF|MAN1A2|MBOAT4|MRE11|MUC4|MUC7|NAA16|NANOG|NEGR1|NEK2|NFAT5|NOP10|NR1D2|OVOL1|PDPK1|PEG3|PGAP1|PHF6|PIK3R1|POLK|REST|RPAIN…	4963/41905 genes: 11.84%
Biological Process	4	cellular macromolecule biosynthetic process	GO:0034645	3.04e-25	1.58e-21	106	ABCA7|ACHE|ADAMTS5|ADAMTSL4|AKT2|ALPI|BANK1|BNC2|BOD1L1|BRDT|BRWD1|CACYBP|CARF|CCDC88A|CD3D|CDK6|CNOT6L|DLX1|DMTF1|DNMT3A|EOGT|ERBB4|ETV1|FAM200A|FIP1L1|FOXN3|FOXP1|GATA1|GIGYF2|GINS4|GLI3|GNPTAB|GTF2I|GXYLT1|HDAC9|IGF1|INTS6|INTS8|LIMS1|LIN28B|MACC1|MAF|MAN1A2|MBOAT4|MRE11|MUC4|MUC7|NAA16|NANOG|NEGR1|NEK2|NFAT5|NOP10|NR1D2|OVOL1|PDPK1|PEG3|PGAP1|PHF6|PIK3R1|POLK|REST|RPAIN|RPL35|SCAF1|SETD7|SKAP…	4796/41905 genes: 11.44%
Biological Process	1	regulation of biological process	GO:0050789	3.13e-25	1.62e-21	159	ABCA7|ACHE|ACTR2|ADAMTS8|ADAMTSL4|ADM2|AGAP1|AKT2|ANGPTL4|APOC4|ARFIP1|ASAH2|BANK1|BNC2|BRDT|BRWD1|CACYBP|CARF|CCBE1|CCDC88A|CCND2|CD3D|CD55|CDK6|CHM|CLEC4G|CNOT6L|CR1|CRACR2B|CRLF1|DAPK2|DBNDD2|DLX1|DMTF1|DNMT3A|ERBB4|ETV1|FAM200A|FBXW8|FCGR1A|FCGR1B|FGD4|FIGNL1|FLRT3|FMOD|FOXN3|FOXP1|FRMPD4|GABRA4|GATA1|GIGYF2|GLI3|GNRHR|GRIA1|GTF2I|HDAC9|IGF1|IL1RL1|IL9R|ILDR1|INHBB|INTS6|ITGAV|ITIH2|KCNC1|KLK…	9780/41905 genes: 23.34%
Biological Process	2	regulation of cellular process	GO:0050794	9.76e-25	5.05e-21	153	ABCA7|ACHE|ACTR2|ADAMTS8|ADAMTSL4|ADM2|AGAP1|AKT2|ANGPTL4|ARFIP1|ASAH2|BANK1|BNC2|BRDT|BRWD1|CACYBP|CARF|CCBE1|CCDC88A|CCND2|CD3D|CD55|CDK6|CHM|CLEC4G|CNOT6L|CR1|CRLF1|DAPK2|DBNDD2|DLX1|DMTF1|DNMT3A|ERBB4|ETV1|FAM200A|FBXW8|FCGR1A|FCGR1B|FGD4|FIGNL1|FLRT3|FMOD|FOXN3|FOXP1|FRMPD4|GABRA4|GATA1|GIGYF2|GLI3|GNRHR|GRIA1|GTF2I|HDAC9|IGF1|IL1RL1|IL9R|ILDR1|INHBB|INTS6|ITGAV|ITIH2|KCNC1|KLK5|LGALS13|LGAL…	9254/41905 genes: 22.08%
Biological Process	2	biosynthetic process	GO:0009058	3.35e-24	1.74e-20	119	ABCA7|ACHE|ADAMTS5|ADAMTSL4|AKT2|ALPI|BANK1|BNC2|BOD1L1|BRDT|BRWD1|CACYBP|CARF|CCDC88A|CD3D|CDK6|CHST5|CNOT6L|CSAD|DHFR2|DLX1|DMTF1|DNMT3A|EOGT|ERBB4|ETV1|FAM200A|FIP1L1|FMOD|FOXN3|FOXP1|GATA1|GGT5|GIGYF2|GINS4|GLI3|GNPTAB|GTF2I|GXYLT1|HDAC9|IGF1|INHBB|INTS6|INTS8|ITGAV|LIMS1|LIN28B|MACC1|MAF|MAN1A2|MBOAT4|MRE11|MUC4|MUC7|NAA16|NANOG|NEGR1|NEK2|NF1|NFAT5|NME9|NOP10|NR1D2|OVOL1|PARP9|PBLD|PDPK1|PE…	6071/41905 genes: 14.49%
Biological Process	1	biological regulation	GO:0065007	5.08e-24	2.63e-20	162	ABCA7|ABCG2|ACHE|ACTR2|ADAMTS8|ADAMTSL4|ADM2|AGAP1|AKT2|ANGPTL4|ANKRD11|APOC4|ARFIP1|ASAH2|BANK1|BNC2|BRDT|BRWD1|CACYBP|CARF|CCBE1|CCDC88A|CCND2|CD3D|CD55|CDH23|CDK6|CHM|CLEC4G|CNOT6L|CR1|CRACR2B|CRLF1|DAPK2|DBNDD2|DLX1|DMTF1|DNMT3A|ERBB4|ETV1|FAM200A|FBXW8|FCGR1A|FCGR1B|FGD4|FIGNL1|FLRT3|FMOD|FOXN3|FOXP1|FRMPD4|GABRA4|GATA1|GIGYF2|GLI3|GNRHR|GRIA1|GTF2I|HDAC9|IGF1|IL1RL1|IL9R|ILDR1|INHBB|INTS6|I…	10348/41905 genes: 24.69%
Biological Process	4	nucleic acid metabolic process	GO:0090304	6.46e-24	3.35e-20	105	ACHE|BNC2|BOD1L1|BRDT|BRWD1|CACYBP|CARF|CCDC88A|CD3D|CDK6|CNOT6L|DLX1|DMTF1|DNMT3A|ELAC1|ERBB4|ERCC6L2|ETV1|FAM200A|FIGNL1|FIP1L1|FOXN3|FOXP1|GATA1|GINS4|GLI3|GTF2I|HDAC9|HEATR1|IGF1|INTS6|INTS8|KRR1|LIMS1|LIN28B|MACC1|MAF|MEIOC|MRE11|MSH3|N4BP2|NAA16|NANOG|NEK2|NFAT5|NOP10|NR1D2|OVOL1|PARP9|PDPK1|PEG3|PGAP1|PHF6|PIK3R1|PNPT1|POLK|RAD18|REST|RPAIN|RPL35|SCAF1|SETD7|SKAP1|SMAD1|SMC5|SOX17|SOX6|SP4…	4900/41905 genes: 11.69%
Biological Process	3	organic substance biosynthetic process	GO:1901576	1.46e-23	7.56e-20	117	ABCA7|ACHE|ADAMTS5|ADAMTSL4|AKT2|ALPI|BANK1|BNC2|BOD1L1|BRDT|BRWD1|CACYBP|CARF|CCDC88A|CD3D|CDK6|CHST5|CNOT6L|CSAD|DHFR2|DLX1|DMTF1|DNMT3A|EOGT|ERBB4|ETV1|FAM200A|FIP1L1|FMOD|FOXN3|FOXP1|GATA1|GGT5|GIGYF2|GINS4|GLI3|GNPTAB|GTF2I|GXYLT1|HDAC9|IGF1|INHBB|INTS6|INTS8|ITGAV|LIMS1|LIN28B|MACC1|MAF|MAN1A2|MBOAT4|MRE11|MUC4|MUC7|NAA16|NANOG|NEGR1|NEK2|NF1|NFAT5|NME9|NOP10|NR1D2|OVOL1|PARP9|PDPK1|PEG3|PG…	5995/41905 genes: 14.31%
Biological Process	3	cellular biosynthetic process	GO:0044249	1.62e-23	8.4e-20	116	ABCA7|ACHE|ADAMTS5|ADAMTSL4|AKT2|ALPI|BANK1|BNC2|BOD1L1|BRDT|BRWD1|CACYBP|CARF|CCDC88A|CD3D|CDK6|CHST5|CNOT6L|CSAD|DHFR2|DLX1|DMTF1|DNMT3A|EOGT|ERBB4|ETV1|FAM200A|FIP1L1|FMOD|FOXN3|FOXP1|GATA1|GGT5|GIGYF2|GINS4|GLI3|GNPTAB|GTF2I|GXYLT1|HDAC9|IGF1|INHBB|INTS6|INTS8|LIMS1|LIN28B|MACC1|MAF|MAN1A2|MBOAT4|MRE11|MUC4|MUC7|NAA16|NANOG|NEGR1|NEK2|NF1|NFAT5|NME9|NOP10|NR1D2|OVOL1|PARP9|PDPK1|PEG3|PGAP1|PH…	5913/41905 genes: 14.11%
Biological Process	2	nitrogen compound metabolic process	GO:0006807	4.1e-23	2.12e-19	122	ABCA7|ABCG2|ACHE|AKT2|ARSH|ASAH2|BANK1|BNC2|BOD1L1|BRDT|BRWD1|CACYBP|CARF|CCDC88A|CD3D|CDK6|CHST5|CNOT6L|CSAD|DBT|DHFR2|DLX1|DMTF1|DNMT3A|ELAC1|ERBB4|ERCC6L2|ETV1|FAM200A|FIGNL1|FIP1L1|FMO1|FMOD|FOXN3|FOXP1|GATA1|GGT5|GIGYF2|GINS4|GLI3|GTF2I|HDAC9|HEATR1|IGF1|INTS6|INTS8|ITIH2|KRR1|LIMS1|LIN28B|MACC1|MAF|MEIOC|MRE11|MSH3|N4BP2|NAA16|NANOG|NEK2|NF1|NFAT5|NME9|NOP10|NR1D2|OVOL1|PARP9|PDPK1|PEG3|PGA…	6525/41905 genes: 15.57%
Biological Process	3	cellular nitrogen compound metabolic process	GO:0034641	1.42e-22	7.34e-19	116	ABCA7|ABCG2|ACHE|AKT2|ASAH2|BANK1|BNC2|BOD1L1|BRDT|BRWD1|CACYBP|CARF|CCDC88A|CD3D|CDK6|CNOT6L|DHFR2|DLX1|DMTF1|DNMT3A|ELAC1|ERBB4|ERCC6L2|ETV1|FAM200A|FIGNL1|FIP1L1|FMO1|FOXN3|FOXP1|GATA1|GGT5|GIGYF2|GINS4|GLI3|GTF2I|HDAC9|HEATR1|IGF1|INTS6|INTS8|KRR1|LIMS1|LIN28B|MACC1|MAF|MEIOC|MRE11|MSH3|N4BP2|NAA16|NANOG|NEK2|NF1|NFAT5|NME9|NOP10|NR1D2|OVOL1|PARP9|PDPK1|PEG3|PGAP1|PHF6|PIK3R1|PNPT1|POLK|RAD18…	6068/41905 genes: 14.48%
Biological Process	3	nucleobase-containing compound metabolic process	GO:0006139	2.22e-22	1.15e-18	109	ACHE|BNC2|BOD1L1|BRDT|BRWD1|CACYBP|CARF|CCDC88A|CD3D|CDK6|CNOT6L|DHFR2|DLX1|DMTF1|DNMT3A|ELAC1|ERBB4|ERCC6L2|ETV1|FAM200A|FIGNL1|FIP1L1|FMO1|FOXN3|FOXP1|GATA1|GINS4|GLI3|GTF2I|HDAC9|HEATR1|IGF1|INTS6|INTS8|KRR1|LIMS1|LIN28B|MACC1|MAF|MEIOC|MRE11|MSH3|N4BP2|NAA16|NANOG|NEK2|NF1|NFAT5|NME9|NOP10|NR1D2|OVOL1|PARP9|PDPK1|PEG3|PGAP1|PHF6|PIK3R1|PNPT1|POLK|RAD18|REST|RPAIN|RPL35|SCAF1|SETD7|SKAP1|SMAD1…	5476/41905 genes: 13.07%
Biological Process	3	heterocycle metabolic process	GO:0046483	6.7e-22	3.47e-18	110	ABCG2|ACHE|BNC2|BOD1L1|BRDT|BRWD1|CACYBP|CARF|CCDC88A|CD3D|CDK6|CNOT6L|DHFR2|DLX1|DMTF1|DNMT3A|ELAC1|ERBB4|ERCC6L2|ETV1|FAM200A|FIGNL1|FIP1L1|FMO1|FOXN3|FOXP1|GATA1|GINS4|GLI3|GTF2I|HDAC9|HEATR1|IGF1|INTS6|INTS8|KRR1|LIMS1|LIN28B|MACC1|MAF|MEIOC|MRE11|MSH3|N4BP2|NAA16|NANOG|NEK2|NF1|NFAT5|NME9|NOP10|NR1D2|OVOL1|PARP9|PDPK1|PEG3|PGAP1|PHF6|PIK3R1|PNPT1|POLK|RAD18|REST|RPAIN|RPL35|SCAF1|SETD7|SKAP1…	5642/41905 genes: 13.46%
Biological Process	3	cellular aromatic compound metabolic process	GO:0006725	1.12e-21	5.81e-18	110	ABCG2|ACHE|BNC2|BOD1L1|BRDT|BRWD1|CACYBP|CARF|CCDC88A|CD3D|CDK6|CNOT6L|DHFR2|DLX1|DMTF1|DNMT3A|ELAC1|ERBB4|ERCC6L2|ETV1|FAM200A|FIGNL1|FIP1L1|FMO1|FOXN3|FOXP1|GATA1|GINS4|GLI3|GTF2I|HDAC9|HEATR1|IGF1|INTS6|INTS8|KRR1|LIMS1|LIN28B|MACC1|MAF|MEIOC|MRE11|MSH3|N4BP2|NAA16|NANOG|NEK2|NF1|NFAT5|NME9|NOP10|NR1D2|OVOL1|PARP9|PDPK1|PEG3|PGAP1|PHF6|PIK3R1|PNPT1|POLK|RAD18|REST|RPAIN|RPL35|SCAF1|SETD7|SKAP1…	5679/41905 genes: 13.55%
Biological Process	2	single-organism cellular process	GO:0044763	1.29e-21	6.65e-18	153	ABCA7|ABCG2|ACHE|ACTR2|ADAMTS5|ADAMTSL4|AKT2|ALPI|ANGPTL4|ARFIP1|ARSH|ASAH2|BANK1|BRDT|BRWD1|CACYBP|CCBE1|CCDC88A|CCND2|CD3D|CD55|CD68|CDH23|CDH8|CDK6|CEP126|CHM|CHST5|CLEC4G|CNOT6L|CR1|CRLF1|CSAD|DAPK2|DBT|DHFR2|DLX1|DMTF1|DNMT3A|EOGT|ERBB4|ETV1|FAM92A|FBXO40|FBXW8|FGD4|FIGNL1|FLRT3|FMO1|FMOD|FOXN3|FOXP1|FRMPD4|GAB3|GATA1|GGT5|GIGYF2|GLI3|GNPTAB|GRIA1|GTF2I|GXYLT1|HDAC9|HOOK1|IGF1|IL1RL1|IL9R|IL…	9904/41905 genes: 23.63%
Biological Process	3	organic cyclic compound metabolic process	GO:1901360	1.62e-20	8.36e-17	110	ABCG2|ACHE|BNC2|BOD1L1|BRDT|BRWD1|CACYBP|CARF|CCDC88A|CD3D|CDK6|CNOT6L|DHFR2|DLX1|DMTF1|DNMT3A|ELAC1|ERBB4|ERCC6L2|ETV1|FAM200A|FIGNL1|FIP1L1|FMO1|FOXN3|FOXP1|GATA1|GINS4|GLI3|GTF2I|HDAC9|HEATR1|IGF1|INTS6|INTS8|KRR1|LIMS1|LIN28B|MACC1|MAF|MEIOC|MRE11|MSH3|N4BP2|NAA16|NANOG|NEK2|NF1|NFAT5|NME9|NOP10|NR1D2|OVOL1|PARP9|PDPK1|PEG3|PGAP1|PHF6|PIK3R1|PNPT1|POLK|RAD18|REST|RPAIN|RPL35|SCAF1|SETD7|SKAP1…	5876/41905 genes: 14.02%
Biological Process	4	nucleobase-containing compound biosynthetic process	GO:0034654	5.92e-19	3.06e-15	88	BNC2|BRDT|BRWD1|CARF|CD3D|CDK6|CNOT6L|DHFR2|DLX1|DMTF1|DNMT3A|ERBB4|ETV1|FAM200A|FIP1L1|FOXN3|FOXP1|GATA1|GLI3|GTF2I|HDAC9|IGF1|INTS6|INTS8|LIMS1|LIN28B|MACC1|MAF|MRE11|NAA16|NANOG|NEK2|NF1|NFAT5|NME9|NOP10|NR1D2|OVOL1|PARP9|PDPK1|PEG3|PHF6|PIK3R1|POLK|REST|RPL35|SCAF1|SETD7|SKAP1|SMAD1|SOX17|SOX6|SP4|SPG20|SUV39H2|TCEANC2|TEAD1|TNF|TRIM14|TRIM52|VGLL1|ZBTB33|ZFP62|ZNF114|ZNF121|ZNF175|ZNF208|ZNF…	4217/41905 genes: 10.06%
Biological Process	4	heterocycle biosynthetic process	GO:0018130	1.49e-18	7.72e-15	88	BNC2|BRDT|BRWD1|CARF|CD3D|CDK6|CNOT6L|DHFR2|DLX1|DMTF1|DNMT3A|ERBB4|ETV1|FAM200A|FIP1L1|FOXN3|FOXP1|GATA1|GLI3|GTF2I|HDAC9|IGF1|INTS6|INTS8|LIMS1|LIN28B|MACC1|MAF|MRE11|NAA16|NANOG|NEK2|NF1|NFAT5|NME9|NOP10|NR1D2|OVOL1|PARP9|PDPK1|PEG3|PHF6|PIK3R1|POLK|REST|RPL35|SCAF1|SETD7|SKAP1|SMAD1|SOX17|SOX6|SP4|SPG20|SUV39H2|TCEANC2|TEAD1|TNF|TRIM14|TRIM52|VGLL1|ZBTB33|ZFP62|ZNF114|ZNF121|ZNF175|ZNF208|ZNF…	4279/41905 genes: 10.21%
Biological Process	4	aromatic compound biosynthetic process	GO:0019438	1.58e-18	8.19e-15	88	BNC2|BRDT|BRWD1|CARF|CD3D|CDK6|CNOT6L|DHFR2|DLX1|DMTF1|DNMT3A|ERBB4|ETV1|FAM200A|FIP1L1|FOXN3|FOXP1|GATA1|GLI3|GTF2I|HDAC9|IGF1|INTS6|INTS8|LIMS1|LIN28B|MACC1|MAF|MRE11|NAA16|NANOG|NEK2|NF1|NFAT5|NME9|NOP10|NR1D2|OVOL1|PARP9|PDPK1|PEG3|PHF6|PIK3R1|POLK|REST|RPL35|SCAF1|SETD7|SKAP1|SMAD1|SOX17|SOX6|SP4|SPG20|SUV39H2|TCEANC2|TEAD1|TNF|TRIM14|TRIM52|VGLL1|ZBTB33|ZFP62|ZNF114|ZNF121|ZNF175|ZNF208|ZNF…	4283/41905 genes: 10.22%
Biological Process	1	response to stimulus	GO:0050896	4.03e-18	2.09e-14	128	ABCA7|ABCG2|ACHE|ACTR2|ADAMTS5|ADM2|AGAP1|AKT2|ANGPTL4|ASAH2|BANK1|BOD1L1|CACYBP|CARF|CCBE1|CCDC88A|CCND2|CD3D|CD55|CD68|CDH23|CDH8|CDK6|CHM|CLEC4G|CNOT6L|CR1|CRLF1|DAPK2|DLX1|DNMT3A|ERBB4|ERCC6L2|ETV1|FCGR1A|FCGR1B|FGD4|FIGNL1|FLRT3|FMO1|FMOD|FOXN3|FOXP1|GABRA4|GATA1|GGT5|GIGYF2|GLI3|GNRHR|GRIA1|GTF2I|HDAC9|HIST1H2BG|IGF1|IL1RL1|IL9R|INHBB|INTS6|IPCEF1|ITGAV|KCNC1|KLK5|LIMS1|LIN28B|MEIOC|MRE11|M…	8080/41905 genes: 19.28%
Biological Process	4	gene expression	GO:0010467	5.85e-18	3.03e-14	95	ADM2|AKT2|BANK1|BNC2|BRDT|BRWD1|CARF|CCBE1|CD3D|CD55|CDK6|CNOT6L|CR1|DLX1|DMTF1|DNMT3A|ELAC1|ERBB4|ETV1|FAM200A|FIP1L1|FOXN3|FOXP1|GATA1|GIGYF2|GLI3|GTF2I|HDAC9|HEATR1|IGF1|INTS6|INTS8|KRR1|LIMS1|LIN28B|MACC1|MAF|MEIOC|NAA16|NANOG|NF1|NFAT5|NOP10|NR1D2|OVOL1|PDPK1|PEG3|PHF6|PIK3R1|PNPT1|RAB27A|REST|RPL35|SCAF1|SETD7|SKAP1|SMAD1|SOX17|SOX6|SP4|SPG20|SUV39H2|TCEANC2|TEAD1|TNF|TRIM14|TRIM52|VGLL1|ZB…	4979/41905 genes: 11.88%
Biological Process	4	cellular nitrogen compound biosynthetic process	GO:0044271	6.84e-18	3.54e-14	92	AKT2|BANK1|BNC2|BRDT|BRWD1|CARF|CD3D|CDK6|CNOT6L|DHFR2|DLX1|DMTF1|DNMT3A|ERBB4|ETV1|FAM200A|FIP1L1|FOXN3|FOXP1|GATA1|GGT5|GIGYF2|GLI3|GTF2I|HDAC9|IGF1|INTS6|INTS8|LIMS1|LIN28B|MACC1|MAF|MRE11|NAA16|NANOG|NEK2|NF1|NFAT5|NME9|NOP10|NR1D2|OVOL1|PARP9|PDPK1|PEG3|PHF6|PIK3R1|POLK|REST|RPL35|SCAF1|SETD7|SKAP1|SMAD1|SOX17|SOX6|SP4|SPG20|SUV39H2|TCEANC2|TEAD1|TNF|TRIM14|TRIM52|VGLL1|ZBTB33|ZFP62|ZNF114|Z…	4728/41905 genes: 11.28%
Biological Process	5	transcription, DNA-templated	GO:0006351	8.69e-18	4.5e-14	79	BNC2|BRDT|BRWD1|CARF|CD3D|CDK6|CNOT6L|DLX1|DMTF1|DNMT3A|ERBB4|ETV1|FAM200A|FIP1L1|FOXN3|FOXP1|GATA1|GLI3|GTF2I|HDAC9|IGF1|INTS6|INTS8|LIMS1|LIN28B|MACC1|MAF|NAA16|NANOG|NFAT5|NR1D2|OVOL1|PDPK1|PEG3|PHF6|PIK3R1|REST|SCAF1|SETD7|SKAP1|SMAD1|SOX17|SOX6|SP4|SPG20|SUV39H2|TCEANC2|TEAD1|TNF|TRIM14|TRIM52|VGLL1|ZBTB33|ZFP62|ZNF114|ZNF121|ZNF175|ZNF208|ZNF268|ZNF277|ZNF326|ZNF33A|ZNF33B|ZNF345|ZNF354B|ZN…	3654/41905 genes: 8.72%
Biological Process	4	organic cyclic compound biosynthetic process	GO:1901362	9.33e-18	4.83e-14	88	BNC2|BRDT|BRWD1|CARF|CD3D|CDK6|CNOT6L|DHFR2|DLX1|DMTF1|DNMT3A|ERBB4|ETV1|FAM200A|FIP1L1|FOXN3|FOXP1|GATA1|GLI3|GTF2I|HDAC9|IGF1|INTS6|INTS8|LIMS1|LIN28B|MACC1|MAF|MRE11|NAA16|NANOG|NEK2|NF1|NFAT5|NME9|NOP10|NR1D2|OVOL1|PARP9|PDPK1|PEG3|PHF6|PIK3R1|POLK|REST|RPL35|SCAF1|SETD7|SKAP1|SMAD1|SOX17|SOX6|SP4|SPG20|SUV39H2|TCEANC2|TEAD1|TNF|TRIM14|TRIM52|VGLL1|ZBTB33|ZFP62|ZNF114|ZNF121|ZNF175|ZNF208|ZNF…	4406/41905 genes: 10.51%
Biological Process	6	nucleic acid-templated transcription	GO:0097659	1.17e-17	6.06e-14	79	BNC2|BRDT|BRWD1|CARF|CD3D|CDK6|CNOT6L|DLX1|DMTF1|DNMT3A|ERBB4|ETV1|FAM200A|FIP1L1|FOXN3|FOXP1|GATA1|GLI3|GTF2I|HDAC9|IGF1|INTS6|INTS8|LIMS1|LIN28B|MACC1|MAF|NAA16|NANOG|NFAT5|NR1D2|OVOL1|PDPK1|PEG3|PHF6|PIK3R1|REST|SCAF1|SETD7|SKAP1|SMAD1|SOX17|SOX6|SP4|SPG20|SUV39H2|TCEANC2|TEAD1|TNF|TRIM14|TRIM52|VGLL1|ZBTB33|ZFP62|ZNF114|ZNF121|ZNF175|ZNF208|ZNF268|ZNF277|ZNF326|ZNF33A|ZNF33B|ZNF345|ZNF354B|ZN…	3673/41905 genes: 8.77%
Biological Process	2	cellular response to stimulus	GO:0051716	1.38e-17	7.16e-14	108	ABCA7|ACTR2|ADM2|AGAP1|AKT2|ASAH2|BANK1|BOD1L1|CACYBP|CARF|CCBE1|CCDC88A|CCND2|CD3D|CD55|CD68|CDK6|CHM|CNOT6L|CR1|CRLF1|DAPK2|DLX1|DNMT3A|ERBB4|ERCC6L2|FCGR1A|FCGR1B|FGD4|FIGNL1|FLRT3|FMO1|FMOD|FOXN3|FOXP1|GABRA4|GATA1|GIGYF2|GLI3|GNRHR|GRIA1|GTF2I|HDAC9|IGF1|IL1RL1|IL9R|INHBB|INTS6|ITGAV|KCNC1|KLK5|LIMS1|LIN28B|MEIOC|MRE11|MSH3|MUC4|MUC7|MYLK3|NF1|NFAT5|NPVF|NR1D2|NXPH2|OR6C65|PARP9|PBLD|PDCL|PD…	6235/41905 genes: 14.88%
Biological Process	1	developmental process	GO:0032502	2.01e-17	1.04e-13	100	ACHE|ACTR2|ADAMTS5|ADAMTSL4|ADM2|AKT2|ANGPTL4|ANKRD11|BNC2|BRDT|BRWD1|C1ORF68|CACYBP|CCBE1|CCDC88A|CD3D|CDH23|CDK6|CRLF1|DLX1|DNMT3A|ERBB4|ETV1|FBXO40|FBXW8|FGD4|FIGNL1|FLRT3|FOXN3|FOXP1|GAB3|GABRA4|GATA1|GIGYF2|GINS4|GLI3|GNRHR|GTF2I|HDAC9|HOOK1|IGF1|INHBB|ITGAV|KCNC1|KIF27|KLK5|KRT38|KRTAP5-10|KRTAP5-11|KRTAP5-2|KRTAP5-7|LCE2A|LIMS1|MAF|MAN1A2|MAP2|MEIOC|MPP5|MREG|MYLK3|MYO7A|NANOG|NEGR1|NEK2|N…	5524/41905 genes: 13.18%
Biological Process	5	RNA biosynthetic process	GO:0032774	2.15e-17	1.11e-13	80	BNC2|BRDT|BRWD1|CARF|CD3D|CDK6|CNOT6L|DLX1|DMTF1|DNMT3A|ERBB4|ETV1|FAM200A|FIP1L1|FOXN3|FOXP1|GATA1|GLI3|GTF2I|HDAC9|IGF1|INTS6|INTS8|LIMS1|LIN28B|MACC1|MAF|NAA16|NANOG|NFAT5|NR1D2|OVOL1|PDPK1|PEG3|PHF6|PIK3R1|REST|RPL35|SCAF1|SETD7|SKAP1|SMAD1|SOX17|SOX6|SP4|SPG20|SUV39H2|TCEANC2|TEAD1|TNF|TRIM14|TRIM52|VGLL1|ZBTB33|ZFP62|ZNF114|ZNF121|ZNF175|ZNF208|ZNF268|ZNF277|ZNF326|ZNF33A|ZNF33B|ZNF345|ZNF3…	3794/41905 genes: 9.05%
Biological Process	2	single-organism developmental process	GO:0044767	2.52e-17	1.3e-13	99	ACHE|ACTR2|ADAMTS5|ADAMTSL4|ADM2|AKT2|ANGPTL4|ANKRD11|BNC2|BRDT|BRWD1|CACYBP|CCBE1|CCDC88A|CD3D|CDH23|CDK6|CRLF1|DLX1|DNMT3A|ERBB4|ETV1|FBXO40|FBXW8|FGD4|FIGNL1|FLRT3|FOXN3|FOXP1|GAB3|GABRA4|GATA1|GIGYF2|GINS4|GLI3|GNRHR|GTF2I|HDAC9|HOOK1|IGF1|INHBB|ITGAV|KCNC1|KIF27|KLK5|KRT38|KRTAP5-10|KRTAP5-11|KRTAP5-2|KRTAP5-7|LCE2A|LIMS1|MAF|MAN1A2|MAP2|MEIOC|MPP5|MREG|MYLK3|MYO7A|NANOG|NEGR1|NEK2|NF1|NOM1|…	5451/41905 genes: 13.01%
Biological Process	1	multicellular organismal process	GO:0032501	5.54e-17	2.87e-13	113	ABCA7|ACHE|ACTR2|ADAMTS5|ADM2|AKT2|ALPI|ANGPTL4|ANKRD11|BANK1|BNC2|BRDT|CACYBP|CCBE1|CCDC88A|CCND2|CD3D|CD55|CDH23|CDK6|CHM|CRLF1|DLX1|DNMT3A|ERBB4|ETV1|FBXW8|FIGNL1|FLRT3|FOXN3|FOXP1|GAB3|GABRA4|GATA1|GIGYF2|GINS4|GLI3|GNRHR|GOLGA3|GRIA1|GTF2I|HDAC9|HOOK1|IGF1|IL1RL1|INHBB|ITGAV|KATNAL1|KCNC1|KIF27|KLK5|KRT38|KRTAP5-10|KRTAP5-11|KRTAP5-2|KRTAP5-7|LCE2A|MAF|MAN1A2|MAP2|MEIOC|MPP5|MRE11|MUC4|MYLK3…	6837/41905 genes: 16.32%
Biological Process	3	regulation of macromolecule metabolic process	GO:0060255	2.65e-16	1.37e-12	94	ABCA7|ACHE|ADM2|AKT2|BANK1|BNC2|BRDT|CACYBP|CARF|CCBE1|CCDC88A|CCND2|CD3D|CD55|CDK6|CNOT6L|CR1|CRLF1|DBNDD2|DLX1|DMTF1|DNMT3A|ERBB4|ETV1|FAM200A|FIGNL1|FOXN3|FOXP1|GATA1|GIGYF2|GLI3|GTF2I|HDAC9|IGF1|INHBB|ITGAV|ITIH2|LIMS1|LIN28B|MACC1|MAF|MEIOC|MRE11|MSH3|NAA16|NANOG|NEK2|NF1|NFAT5|NR1D2|OVOL1|PBLD|PDPK1|PEG3|PHF6|PIK3R1|PNPT1|PRKCE|RAB27A|REST|SCIMP|SERPINC1|SETD7|SKAP1|SMAD1|SOCS4|SOX17|SOX6|S…	5188/41905 genes: 12.38%
Biological Process	4	RNA metabolic process	GO:0016070	3.64e-16	1.88e-12	85	BNC2|BRDT|BRWD1|CARF|CD3D|CDK6|CNOT6L|DLX1|DMTF1|DNMT3A|ELAC1|ERBB4|ETV1|FAM200A|FIP1L1|FOXN3|FOXP1|GATA1|GLI3|GTF2I|HDAC9|HEATR1|IGF1|INTS6|INTS8|KRR1|LIMS1|LIN28B|MACC1|MAF|NAA16|NANOG|NFAT5|NOP10|NR1D2|OVOL1|PDPK1|PEG3|PHF6|PIK3R1|PNPT1|REST|RPL35|SCAF1|SETD7|SKAP1|SMAD1|SOX17|SOX6|SP4|SPG20|SUV39H2|TCEANC2|TEAD1|TNF|TRIM14|TRIM52|VGLL1|ZBTB33|ZFP62|ZNF114|ZNF121|ZNF175|ZNF208|ZNF268|ZNF277|ZN…	4415/41905 genes: 10.54%
Biological Process	3	regulation of cellular metabolic process	GO:0031323	1.29e-15	6.68e-12	93	ABCA7|ACHE|AKT2|BANK1|BNC2|BRDT|CACYBP|CARF|CCBE1|CCDC88A|CCND2|CD3D|CD55|CDK6|CNOT6L|CR1|CRLF1|DBNDD2|DLX1|DMTF1|DNMT3A|ERBB4|ETV1|FAM200A|FIGNL1|FOXN3|FOXP1|GATA1|GIGYF2|GLI3|GTF2I|HDAC9|IGF1|INHBB|ITGAV|ITIH2|LIMS1|LIN28B|MACC1|MAF|MRE11|MSH3|NAA16|NANOG|NEK2|NF1|NFAT5|NR1D2|OVOL1|PBLD|PDPK1|PEG3|PHF6|PIK3R1|PNPT1|PPP1R37|PRKCE|RAB27A|REST|SCIMP|SERPINC1|SETD7|SKAP1|SMAD1|SOCS4|SOX17|SOX6|SP4|…	5228/41905 genes: 12.48%
Biological Process	2	anatomical structure development	GO:0048856	1.83e-15	9.46e-12	92	ACHE|ACTR2|ADAMTS5|ADAMTSL4|ADM2|AKT2|ANGPTL4|ANKRD11|BNC2|BRWD1|C1ORF68|CACYBP|CCBE1|CCDC88A|CD3D|CDH23|CDK6|CRLF1|DLX1|DNMT3A|ERBB4|ETV1|FBXO40|FBXW8|FGD4|FLRT3|FOXN3|FOXP1|GAB3|GABRA4|GATA1|GIGYF2|GINS4|GLI3|GNRHR|GTF2I|HDAC9|HOOK1|IGF1|INHBB|ITGAV|KCNC1|KIF27|KLK5|KRT38|KRTAP5-10|KRTAP5-11|KRTAP5-2|KRTAP5-7|LCE2A|LIMS1|MAF|MAN1A2|MAP2|MEIOC|MPP5|MYLK3|MYO7A|NANOG|NEGR1|NEK2|NF1|NOM1|NR1D2|OR1…	5166/41905 genes: 12.33%
Biological Process	3	cellular developmental process	GO:0048869	2.73e-15	1.41e-11	75	ACHE|ACTR2|ADAMTSL4|AKT2|ANGPTL4|BRDT|BRWD1|CACYBP|CCDC88A|CD3D|CDH23|CDK6|DLX1|DNMT3A|ERBB4|ETV1|FBXO40|FBXW8|FGD4|FIGNL1|FLRT3|FOXP1|GAB3|GATA1|GIGYF2|GLI3|HDAC9|HOOK1|IGF1|INHBB|ITGAV|KLK5|KRT38|KRTAP5-10|KRTAP5-11|KRTAP5-2|KRTAP5-7|LCE2A|LIMS1|MAF|MAP2|MEIOC|MPP5|MREG|MYLK3|MYO7A|NANOG|NEGR1|NF1|NR1D2|OR10A4|PBLD|PDPK1|PIK3R1|PNPT1|PRKX|RAB27A|REST|SDCCAG8|SEMA5A|SHTN1|SMAD1|SMC5|SOX17|SOX6|S…	3711/41905 genes: 8.86%
Biological Process	1	positive regulation of biological process	GO:0048518	3.05e-15	1.58e-11	90	ABCA7|ACHE|ACTR2|ADAMTSL4|ADM2|AKT2|ANGPTL4|APOC4|BANK1|BRDT|CACYBP|CARF|CCBE1|CCDC88A|CCND2|CD3D|CD55|CDK6|CNOT6L|CR1|CRLF1|DAPK2|DNMT3A|ERBB4|ETV1|FBXW8|FCGR1A|FGD4|FLRT3|FOXP1|FRMPD4|GATA1|GLI3|HDAC9|IGF1|IL1RL1|IL9R|ILDR1|INHBB|ITGAV|KCNC1|KLK5|LGALS13|LGALS14|LGALS16|LIMS1|MACC1|MAF|MRE11|MUC4|MUC7|MYLK3|NAA16|NANOG|NEGR1|NEK2|NF1|NFAT5|NOP10|NR1D2|OVOL1|PDPK1|PEG3|PIK3R1|PNPT1|PRKCE|RAB27A|…	5027/41905 genes: 12.00%
Biological Process	2	regulation of metabolic process	GO:0019222	5.15e-15	2.67e-11	95	ABCA7|ACHE|ADM2|AKT2|BANK1|BNC2|BRDT|CACYBP|CARF|CCBE1|CCDC88A|CCND2|CD3D|CD55|CDK6|CNOT6L|CR1|CRLF1|DBNDD2|DLX1|DMTF1|DNMT3A|ERBB4|ETV1|FAM200A|FIGNL1|FOXN3|FOXP1|GATA1|GIGYF2|GLI3|GTF2I|HDAC9|IGF1|INHBB|ITGAV|ITIH2|LIMS1|LIN28B|MACC1|MAF|MEIOC|MRE11|MSH3|NAA16|NANOG|NEK2|NF1|NFAT5|NR1D2|OVOL1|PBLD|PDPK1|PEG3|PHF6|PIK3R1|PNPT1|PPP1R37|PRKCE|RAB27A|REST|SCIMP|SERPINC1|SETD7|SKAP1|SMAD1|SOCS4|SOX1…	5532/41905 genes: 13.20%
Biological Process	3	regulation of primary metabolic process	GO:0080090	1.72e-14	8.92e-11	90	ABCA7|AKT2|BANK1|BNC2|BRDT|CACYBP|CARF|CCBE1|CCDC88A|CCND2|CD3D|CD55|CDK6|CNOT6L|CR1|CRLF1|DBNDD2|DLX1|DMTF1|DNMT3A|ERBB4|ETV1|FAM200A|FIGNL1|FOXN3|FOXP1|GATA1|GIGYF2|GLI3|GTF2I|HDAC9|IGF1|INHBB|ITGAV|ITIH2|LIMS1|LIN28B|MACC1|MAF|MRE11|MSH3|NAA16|NANOG|NEK2|NF1|NFAT5|NR1D2|OVOL1|PBLD|PDPK1|PEG3|PHF6|PIK3R1|PNPT1|PRKCE|REST|SCIMP|SERPINC1|SETD7|SKAP1|SMAD1|SOCS4|SOX17|SOX6|SP4|SPG20|SUV39H2|SYNJ2B…	5175/41905 genes: 12.35%
Biological Process	2	single-multicellular organism process	GO:0044707	1.84e-14	9.51e-11	97	ABCA7|ACHE|ACTR2|ADAMTS5|ADM2|AKT2|ALPI|ANGPTL4|ANKRD11|BANK1|BNC2|CACYBP|CCBE1|CCDC88A|CCND2|CD3D|CD55|CDH23|CDK6|CRLF1|DLX1|DNMT3A|ERBB4|ETV1|FBXW8|FIGNL1|FLRT3|FOXN3|FOXP1|GAB3|GABRA4|GATA1|GIGYF2|GINS4|GLI3|GNRHR|GRIA1|GTF2I|HDAC9|HOOK1|IGF1|IL1RL1|INHBB|ITGAV|KCNC1|KIF27|KLK5|KRT38|KRTAP5-10|KRTAP5-11|KRTAP5-2|KRTAP5-7|LCE2A|MAF|MAN1A2|MAP2|MPP5|MRE11|MUC4|MYLK3|MYO7A|NANOG|NEGR1|NEK2|NF1|NF…	5836/41905 genes: 13.93%
Biological Process	4	regulation of macromolecule biosynthetic process	GO:0010556	6.18e-14	3.2e-10	72	ABCA7|AKT2|BANK1|BNC2|BRDT|CACYBP|CARF|CCDC88A|CD3D|CDK6|CNOT6L|DLX1|DMTF1|DNMT3A|ERBB4|ETV1|FAM200A|FOXN3|FOXP1|GATA1|GIGYF2|GLI3|GTF2I|HDAC9|IGF1|INHBB|ITGAV|LIMS1|LIN28B|MACC1|MAF|MRE11|NAA16|NANOG|NEK2|NFAT5|NR1D2|OVOL1|PDPK1|PEG3|PHF6|PIK3R1|REST|SETD7|SKAP1|SMAD1|SOX17|SOX6|SP4|SPG20|SUV39H2|TEAD1|TNF|TRIM14|TRIM52|VGLL1|ZBTB33|ZFP62|ZNF175|ZNF208|ZNF268|ZNF277|ZNF326|ZNF33A|ZNF345|ZNF354B|…	3685/41905 genes: 8.79%
Biological Process	5	regulation of cellular macromolecule biosynthetic process	GO:2000112	1.18e-13	6.11e-10	70	ABCA7|AKT2|BANK1|BNC2|BRDT|CACYBP|CARF|CCDC88A|CD3D|CDK6|CNOT6L|DLX1|DMTF1|DNMT3A|ERBB4|ETV1|FAM200A|FOXN3|FOXP1|GATA1|GIGYF2|GLI3|GTF2I|HDAC9|IGF1|LIMS1|LIN28B|MACC1|MAF|MRE11|NAA16|NANOG|NEK2|NFAT5|NR1D2|OVOL1|PDPK1|PEG3|PHF6|PIK3R1|REST|SETD7|SKAP1|SMAD1|SOX17|SOX6|SP4|SPG20|SUV39H2|TEAD1|TNF|TRIM14|TRIM52|VGLL1|ZBTB33|ZFP62|ZNF175|ZNF208|ZNF268|ZNF277|ZNF326|ZNF33A|ZNF345|ZNF354B|ZNF426|ZNF50…	3564/41905 genes: 8.50%
Biological Process	3	regulation of biosynthetic process	GO:0009889	1.25e-13	6.48e-10	74	ABCA7|AKT2|BANK1|BNC2|BRDT|CACYBP|CARF|CCDC88A|CD3D|CDK6|CNOT6L|DLX1|DMTF1|DNMT3A|ERBB4|ETV1|FAM200A|FOXN3|FOXP1|GATA1|GIGYF2|GLI3|GTF2I|HDAC9|IGF1|INHBB|ITGAV|LIMS1|LIN28B|MACC1|MAF|MRE11|NAA16|NANOG|NEK2|NF1|NFAT5|NR1D2|OVOL1|PDPK1|PEG3|PHF6|PIK3R1|RAB27A|REST|SETD7|SKAP1|SMAD1|SOX17|SOX6|SP4|SPG20|SUV39H2|TEAD1|TNF|TRIM14|TRIM52|VGLL1|ZBTB33|ZFP62|ZNF175|ZNF208|ZNF268|ZNF277|ZNF326|ZNF33A|ZNF3…	3910/41905 genes: 9.33%
Biological Process	2	positive regulation of cellular process	GO:0048522	1.26e-13	6.52e-10	80	ABCA7|ACHE|ACTR2|ADAMTSL4|AKT2|BANK1|BRDT|CACYBP|CARF|CCBE1|CCDC88A|CCND2|CD3D|CD55|CDK6|CNOT6L|CR1|CRLF1|DAPK2|DNMT3A|ERBB4|ETV1|FBXW8|FGD4|FLRT3|FOXP1|FRMPD4|GATA1|GLI3|HDAC9|IGF1|IL1RL1|IL9R|ILDR1|INHBB|ITGAV|KCNC1|KLK5|LGALS13|LGALS14|LGALS16|LIMS1|MACC1|MAF|MRE11|MYLK3|NAA16|NANOG|NEGR1|NEK2|NF1|NFAT5|NR1D2|OVOL1|PDPK1|PEG3|PIK3R1|PNPT1|PRKCE|RAB27A|RAD18|REST|SCIMP|SEMA5A|SETD7|SHTN1|SKAP1|…	4438/41905 genes: 10.59%
Biological Process	1	negative regulation of biological process	GO:0048519	1.66e-13	8.61e-10	79	ABCA7|ACHE|ADAMTS8|AKT2|ANGPTL4|BANK1|CACYBP|CCND2|CD55|CDK6|CLEC4G|CNOT6L|CR1|CRLF1|DBNDD2|DLX1|DNMT3A|ERBB4|FIGNL1|FOXN3|FOXP1|GATA1|GIGYF2|GLI3|GRIA1|GTF2I|HDAC9|IGF1|IL1RL1|INHBB|ITGAV|ITIH2|LIMS1|LIN28B|LZTFL1|MAF|MRE11|MSH3|NAA16|NANOG|NEK2|NF1|NPVF|NR1D2|OVOL1|PBLD|PDCL|PDPK1|PEG3|PIK3R1|PNPT1|PPP1R37|PRKCE|RAD18|RERG|REST|RGS5|SEMA5A|SERPINC1|SMAD1|SOCS4|SOX17|SOX6|SPG20|SUV39H2|SYNJ2BP|T…	4372/41905 genes: 10.43%
Biological Process	3	regulation of nitrogen compound metabolic process	GO:0051171	1.86e-13	9.61e-10	74	ABCA7|AKT2|BANK1|BNC2|BRDT|CACYBP|CARF|CCDC88A|CD3D|CDK6|CNOT6L|DLX1|DMTF1|DNMT3A|ERBB4|ETV1|FAM200A|FIGNL1|FOXN3|FOXP1|GATA1|GIGYF2|GLI3|GTF2I|HDAC9|IGF1|LIMS1|LIN28B|MACC1|MAF|MRE11|MSH3|NAA16|NANOG|NEK2|NF1|NFAT5|NR1D2|OVOL1|PDPK1|PEG3|PHF6|PIK3R1|PNPT1|REST|SETD7|SKAP1|SMAD1|SOX17|SOX6|SP4|SPG20|SUV39H2|TEAD1|TNF|TRIM14|TRIM52|VGLL1|ZBTB33|ZFP62|ZNF175|ZNF208|ZNF268|ZNF277|ZNF326|ZNF33A|ZNF34…	3941/41905 genes: 9.40%
Biological Process	3	multicellular organism development	GO:0007275	2.09e-13	1.08e-09	83	ACHE|ACTR2|ADAMTS5|ADM2|AKT2|ANGPTL4|ANKRD11|BNC2|CACYBP|CCBE1|CCDC88A|CD3D|CDH23|CDK6|CRLF1|DLX1|DNMT3A|ERBB4|ETV1|FBXW8|FLRT3|FOXN3|FOXP1|GAB3|GABRA4|GATA1|GIGYF2|GINS4|GLI3|GNRHR|GTF2I|HDAC9|HOOK1|IGF1|INHBB|ITGAV|KCNC1|KIF27|KLK5|KRT38|KRTAP5-10|KRTAP5-11|KRTAP5-2|KRTAP5-7|LCE2A|MAF|MAN1A2|MAP2|MPP5|MYLK3|MYO7A|NANOG|NEGR1|NEK2|NF1|NOM1|NR1D2|OR10A4|OVOL1|PBLD|PCDHAC1|PDPK1|PGAP1|PIK3R1|PKD1L…	4752/41905 genes: 11.34%
Biological Process	2	negative regulation of cellular process	GO:0048523	2.21e-13	1.14e-09	75	ABCA7|ACHE|ADAMTS8|AKT2|ANGPTL4|BANK1|CACYBP|CCND2|CD55|CDK6|CLEC4G|CNOT6L|CR1|CRLF1|DBNDD2|DLX1|DNMT3A|ERBB4|FIGNL1|FOXN3|FOXP1|GATA1|GIGYF2|GLI3|GRIA1|HDAC9|IGF1|IL1RL1|INHBB|ITGAV|ITIH2|LIMS1|LIN28B|MAF|MRE11|MSH3|NAA16|NANOG|NEK2|NF1|NPVF|NR1D2|OVOL1|PBLD|PDCL|PDPK1|PEG3|PIK3R1|PNPT1|PPP1R37|PRKCE|RAD18|RERG|REST|RGS5|SEMA5A|SERPINC1|SMAD1|SOCS4|SOX17|SOX6|SPG20|SUV39H2|SYNJ2BP|TACSTD2|TMEM67…	4042/41905 genes: 9.65%
Biological Process	4	cell differentiation	GO:0030154	3.07e-13	1.59e-09	69	ACHE|ACTR2|ADAMTSL4|AKT2|ANGPTL4|BRDT|CACYBP|CCDC88A|CD3D|CDH23|CDK6|DLX1|DNMT3A|ERBB4|ETV1|FBXO40|FBXW8|FIGNL1|FLRT3|FOXP1|GAB3|GATA1|GIGYF2|GLI3|HDAC9|HOOK1|IGF1|INHBB|ITGAV|KLK5|KRT38|KRTAP5-10|KRTAP5-11|KRTAP5-2|KRTAP5-7|LCE2A|LIMS1|MAF|MAP2|MEIOC|MPP5|MREG|MYLK3|MYO7A|NANOG|NEGR1|NF1|NR1D2|OR10A4|PBLD|PDPK1|PIK3R1|PRKX|RAB27A|REST|SDCCAG8|SEMA5A|SHTN1|SMAD1|SOX17|SOX6|SPANXB1|SPEM1|SPG20|SUV…	3551/41905 genes: 8.47%
Biological Process	4	regulation of cellular biosynthetic process	GO:0031326	6.11e-13	3.16e-09	72	ABCA7|AKT2|BANK1|BNC2|BRDT|CACYBP|CARF|CCDC88A|CD3D|CDK6|CNOT6L|DLX1|DMTF1|DNMT3A|ERBB4|ETV1|FAM200A|FOXN3|FOXP1|GATA1|GIGYF2|GLI3|GTF2I|HDAC9|IGF1|INHBB|LIMS1|LIN28B|MACC1|MAF|MRE11|NAA16|NANOG|NEK2|NF1|NFAT5|NR1D2|OVOL1|PDPK1|PEG3|PHF6|PIK3R1|REST|SETD7|SKAP1|SMAD1|SOX17|SOX6|SP4|SPG20|SUV39H2|TEAD1|TNF|TRIM14|TRIM52|VGLL1|ZBTB33|ZFP62|ZNF175|ZNF208|ZNF268|ZNF277|ZNF326|ZNF33A|ZNF345|ZNF354B|ZN…	3862/41905 genes: 9.22%
Biological Process	3	system development	GO:0048731	6.41e-13	3.32e-09	76	ACHE|ACTR2|ADAMTS5|ADM2|AKT2|ANGPTL4|ANKRD11|BNC2|CACYBP|CCBE1|CCDC88A|CD3D|CDH23|CDK6|CRLF1|DLX1|DNMT3A|ERBB4|ETV1|FBXW8|FLRT3|FOXN3|FOXP1|GAB3|GABRA4|GATA1|GIGYF2|GLI3|GTF2I|HDAC9|IGF1|INHBB|ITGAV|KCNC1|KIF27|KLK5|KRT38|KRTAP5-10|KRTAP5-11|KRTAP5-2|KRTAP5-7|LCE2A|MAF|MAN1A2|MAP2|MPP5|MYLK3|MYO7A|NEGR1|NF1|NOM1|NR1D2|OR10A4|OVOL1|PBLD|PCDHAC1|PDPK1|PGAP1|PIK3R1|PNPT1|PRKX|REST|SDCCAG8|SEMA5A|SER…	4218/41905 genes: 10.07%
Biological Process	4	regulation of gene expression	GO:0010468	6.5e-13	3.36e-09	72	ADM2|AKT2|BANK1|BNC2|BRDT|CARF|CCBE1|CD3D|CD55|CDK6|CNOT6L|CR1|DLX1|DMTF1|DNMT3A|ERBB4|ETV1|FAM200A|FOXN3|FOXP1|GATA1|GIGYF2|GLI3|GTF2I|HDAC9|IGF1|LIMS1|LIN28B|MACC1|MAF|MEIOC|NAA16|NANOG|NF1|NFAT5|NR1D2|OVOL1|PDPK1|PEG3|PHF6|PIK3R1|RAB27A|REST|SETD7|SKAP1|SMAD1|SOX17|SOX6|SP4|SPG20|SUV39H2|TEAD1|TNF|TRIM14|TRIM52|VGLL1|ZBTB33|ZFP62|ZNF175|ZNF208|ZNF268|ZNF277|ZNF326|ZNF33A|ZNF345|ZNF354B|ZNF426|…	3867/41905 genes: 9.23%
Biological Process	4	regulation of nucleobase-containing compound metabolic process	GO:0019219	6.84e-13	3.54e-09	70	BNC2|BRDT|CACYBP|CARF|CCDC88A|CD3D|CDK6|CNOT6L|DLX1|DMTF1|DNMT3A|ERBB4|ETV1|FAM200A|FIGNL1|FOXN3|FOXP1|GATA1|GLI3|GTF2I|HDAC9|IGF1|LIMS1|LIN28B|MACC1|MAF|MRE11|MSH3|NAA16|NANOG|NEK2|NF1|NFAT5|NR1D2|OVOL1|PDPK1|PEG3|PHF6|PIK3R1|PNPT1|REST|SETD7|SKAP1|SMAD1|SOX17|SOX6|SP4|SPG20|SUV39H2|TEAD1|TNF|TRIM14|TRIM52|VGLL1|ZBTB33|ZFP62|ZNF175|ZNF208|ZNF268|ZNF277|ZNF326|ZNF33A|ZNF345|ZNF354B|ZNF426|ZNF507|…	3698/41905 genes: 8.82%
Biological Process	5	regulation of transcription, DNA-templated	GO:0006355	7.4e-12	3.83e-08	62	BNC2|BRDT|CARF|CD3D|CDK6|CNOT6L|DLX1|DMTF1|DNMT3A|ERBB4|ETV1|FAM200A|FOXN3|FOXP1|GATA1|GLI3|GTF2I|HDAC9|IGF1|LIMS1|LIN28B|MACC1|MAF|NAA16|NANOG|NFAT5|NR1D2|OVOL1|PDPK1|PEG3|PHF6|PIK3R1|REST|SETD7|SKAP1|SMAD1|SOX17|SOX6|SP4|SPG20|SUV39H2|TEAD1|TNF|TRIM14|TRIM52|VGLL1|ZBTB33|ZFP62|ZNF175|ZNF208|ZNF268|ZNF277|ZNF326|ZNF33A|ZNF345|ZNF354B|ZNF426|ZNF507|ZNF566|ZNF765|ZNF800|ZNF850	3201/41905 genes: 7.64%
Biological Process	6	regulation of nucleic acid-templated transcription	GO:1903506	1.05e-11	5.44e-08	62	BNC2|BRDT|CARF|CD3D|CDK6|CNOT6L|DLX1|DMTF1|DNMT3A|ERBB4|ETV1|FAM200A|FOXN3|FOXP1|GATA1|GLI3|GTF2I|HDAC9|IGF1|LIMS1|LIN28B|MACC1|MAF|NAA16|NANOG|NFAT5|NR1D2|OVOL1|PDPK1|PEG3|PHF6|PIK3R1|REST|SETD7|SKAP1|SMAD1|SOX17|SOX6|SP4|SPG20|SUV39H2|TEAD1|TNF|TRIM14|TRIM52|VGLL1|ZBTB33|ZFP62|ZNF175|ZNF208|ZNF268|ZNF277|ZNF326|ZNF33A|ZNF345|ZNF354B|ZNF426|ZNF507|ZNF566|ZNF765|ZNF800|ZNF850	3228/41905 genes: 7.70%
Biological Process	1	cellular component organization or biogenesis	GO:0071840	1.3e-11	6.74e-08	88	ABCA7|ACHE|ACTR2|ADAMTS5|ADAMTSL4|AKT2|ANGPTL4|BRDT|BRWD1|CCDC88A|CD3D|CDH23|CDH8|CEP126|CHM|CNOT6L|DNMT3A|ERBB4|ETV1|FAM92A|FBXW8|FCGR1A|FGD4|FLRT3|FMOD|FRMPD4|GATA1|GINS4|GLI3|GNPTAB|GRIA1|GTPBP10|HDAC9|HEATR1|HIST1H2BG|HOOK1|IGF1|IL9R|ITGAV|KCNC1|KCTD12|KIF27|KRR1|LIMS1|MAP2|MEIOC|MPP5|MRE11|MSH3|MYLK3|MYO7A|NEGR1|NEK2|NF1|NOP10|OR10A4|PADI1|PDCL|PDPK1|PIK3C2A|PIK3R1|PNPT1|PRKCE|RAB27A|RERG|RE…	5619/41905 genes: 13.41%
Biological Process	5	regulation of RNA biosynthetic process	GO:2001141	1.4e-11	7.22e-08	62	BNC2|BRDT|CARF|CD3D|CDK6|CNOT6L|DLX1|DMTF1|DNMT3A|ERBB4|ETV1|FAM200A|FOXN3|FOXP1|GATA1|GLI3|GTF2I|HDAC9|IGF1|LIMS1|LIN28B|MACC1|MAF|NAA16|NANOG|NFAT5|NR1D2|OVOL1|PDPK1|PEG3|PHF6|PIK3R1|REST|SETD7|SKAP1|SMAD1|SOX17|SOX6|SP4|SPG20|SUV39H2|TEAD1|TNF|TRIM14|TRIM52|VGLL1|ZBTB33|ZFP62|ZNF175|ZNF208|ZNF268|ZNF277|ZNF326|ZNF33A|ZNF345|ZNF354B|ZNF426|ZNF507|ZNF566|ZNF765|ZNF800|ZNF850	3250/41905 genes: 7.76%
Biological Process	2	response to stress	GO:0006950	1.43e-11	7.4e-08	64	ACHE|ACTR2|ADAMTS5|ANGPTL4|BOD1L1|CD55|CDH8|CDK6|CNOT6L|CR1|DNMT3A|ERBB4|ERCC6L2|FCGR1A|FCGR1B|FIGNL1|FLRT3|FMO1|FOXN3|FOXP1|GATA1|GGT5|GIGYF2|GLI3|HDAC9|HIST1H2BG|IGF1|IL1RL1|INHBB|IPCEF1|KLK5|MEIOC|MRE11|MSH3|MUC4|MUC7|MYLK3|NF1|NFAT5|NR1D2|PARP9|PDPK1|PIK3R1|PNPT1|POLK|PRKCE|RAB27A|RAD18|RPAIN|SERPINC1|SETD7|SIRPB1|SMAD1|SMC5|SUV39H2|TBXA2R|TCIRG1|TMEM67|TNF|TNFRSF10B|TRIM14|USP45|ZNF175|ZNF277	3423/41905 genes: 8.17%
Biological Process	4	regulation of RNA metabolic process	GO:0051252	1.95e-11	1.01e-07	63	BNC2|BRDT|CARF|CD3D|CDK6|CNOT6L|DLX1|DMTF1|DNMT3A|ERBB4|ETV1|FAM200A|FOXN3|FOXP1|GATA1|GLI3|GTF2I|HDAC9|IGF1|LIMS1|LIN28B|MACC1|MAF|NAA16|NANOG|NFAT5|NR1D2|OVOL1|PDPK1|PEG3|PHF6|PIK3R1|PNPT1|REST|SETD7|SKAP1|SMAD1|SOX17|SOX6|SP4|SPG20|SUV39H2|TEAD1|TNF|TRIM14|TRIM52|VGLL1|ZBTB33|ZFP62|ZNF175|ZNF208|ZNF268|ZNF277|ZNF326|ZNF33A|ZNF345|ZNF354B|ZNF426|ZNF507|ZNF566|ZNF765|ZNF800|ZNF850	3362/41905 genes: 8.02%
Biological Process	3	cell development	GO:0048468	6.11e-11	3.17e-07	42	ACHE|ACTR2|ADAMTSL4|AKT2|CCDC88A|CDH23|CDK6|DLX1|ERBB4|ETV1|FBXW8|FLRT3|FOXP1|GATA1|GLI3|HDAC9|HOOK1|IGF1|INHBB|ITGAV|LIMS1|MAF|MAP2|MEIOC|MPP5|MYLK3|MYO7A|NEGR1|NF1|OR10A4|PDPK1|PIK3R1|REST|SEMA5A|SHTN1|SOX17|SOX6|SPANXB1|SPEM1|SPG20|TACSTD2|TNF	1759/41905 genes: 4.20%
Biological Process	1	localization	GO:0051179	6.57e-11	3.4e-07	88	ABCA7|ABCG2|ACHE|ACTR2|ADAMTS8|AGAP1|AKT2|APOC4|ARFIP1|BANK1|CCBE1|CCDC88A|CD55|CD68|CDH23|CDK6|CHM|CR1|CRACR2B|DAPK2|ERBB4|FCGR1A|FCGR1B|FIP1L1|FLRT3|FOXP1|GABRA4|GLI3|GNPTAB|GOLGA3|GRIA1|HDAC9|HOOK1|IGF1|IL1RL1|IL9R|ILDR1|INHBB|IPCEF1|ITGAV|KCNC1|KIF1B|LIMS1|LZTFL1|MEIOC|MPP5|MREG|MYO7A|NF1|NIPAL1|NOP10|NPVF|PARP9|PBLD|PDPK1|PGAP1|PIK3C2A|PIK3R1|PKD1L1|PNPT1|PRELID2|PRKCE|PRKX|RAB27A|REST|RPAIN…	5793/41905 genes: 13.82%
Biological Process	2	cellular component organization	GO:0016043	9.29e-11	4.81e-07	84	ABCA7|ACHE|ACTR2|ADAMTS5|ADAMTSL4|AKT2|ANGPTL4|BRDT|BRWD1|CCDC88A|CD3D|CDH23|CDH8|CEP126|CHM|CNOT6L|DNMT3A|ERBB4|ETV1|FAM92A|FBXW8|FCGR1A|FGD4|FLRT3|FMOD|FRMPD4|GATA1|GINS4|GLI3|GNPTAB|GRIA1|HDAC9|HIST1H2BG|HOOK1|IGF1|IL9R|ITGAV|KCNC1|KCTD12|KIF27|LIMS1|MAP2|MEIOC|MPP5|MRE11|MSH3|MYLK3|MYO7A|NEGR1|NEK2|NF1|NOP10|OR10A4|PADI1|PDCL|PDPK1|PIK3C2A|PIK3R1|PNPT1|PRKCE|RAB27A|RERG|REST|SDCCAG8|SEMA5A|SE…	5439/41905 genes: 12.98%
Biological Process	2	single organism signaling	GO:0044700	1.98e-10	1.03e-06	84	ABCA7|ACHE|ACTR2|ADM2|AGAP1|AKT2|ASAH2|BANK1|CCBE1|CCDC88A|CD3D|CD55|CDH8|CDK6|CHM|CNOT6L|CR1|CRLF1|DAPK2|DLX1|ERBB4|FCGR1A|FCGR1B|FGD4|FIGNL1|FLRT3|FMOD|FOXP1|GABRA4|GATA1|GIGYF2|GLI3|GNRHR|GRIA1|GTF2I|IGF1|IL1RL1|IL9R|ILDR1|INHBB|INTS6|ITGAV|KIF1B|KLK5|MRE11|MUC4|MUC7|NF1|NFAT5|NPVF|NR1D2|NXPH2|OR6C65|PBLD|PDCL|PDPK1|PIK3C2A|PIK3R1|PRKCE|RAB27A|RABL3|RERG|REST|RGS5|SCIMP|SEMA5A|SHTN1|SIRPB1|SKA…	5522/41905 genes: 13.18%
Biological Process	1	signaling	GO:0023052	2.17e-10	1.12e-06	84	ABCA7|ACHE|ACTR2|ADM2|AGAP1|AKT2|ASAH2|BANK1|CCBE1|CCDC88A|CD3D|CD55|CDH8|CDK6|CHM|CNOT6L|CR1|CRLF1|DAPK2|DLX1|ERBB4|FCGR1A|FCGR1B|FGD4|FIGNL1|FLRT3|FMOD|FOXP1|GABRA4|GATA1|GIGYF2|GLI3|GNRHR|GRIA1|GTF2I|IGF1|IL1RL1|IL9R|ILDR1|INHBB|INTS6|ITGAV|KIF1B|KLK5|MRE11|MUC4|MUC7|NF1|NFAT5|NPVF|NR1D2|NXPH2|OR6C65|PBLD|PDCL|PDPK1|PIK3C2A|PIK3R1|PRKCE|RAB27A|RABL3|RERG|REST|RGS5|SCIMP|SEMA5A|SHTN1|SIRPB1|SKA…	5532/41905 genes: 13.20%
Biological Process	2	cell communication	GO:0007154	2.33e-10	1.21e-06	84	ABCA7|ACHE|ACTR2|ADM2|AGAP1|AKT2|ASAH2|BANK1|CCBE1|CCDC88A|CD3D|CD55|CDH8|CDK6|CHM|CNOT6L|CR1|CRLF1|DAPK2|DLX1|ERBB4|FCGR1A|FCGR1B|FGD4|FIGNL1|FLRT3|FMOD|FOXP1|GABRA4|GATA1|GIGYF2|GLI3|GNRHR|GRIA1|GTF2I|IGF1|IL1RL1|IL9R|ILDR1|INHBB|INTS6|ITGAV|KIF1B|KLK5|MRE11|MUC4|MUC7|NF1|NFAT5|NPVF|NR1D2|NXPH2|OR6C65|PBLD|PDCL|PDPK1|PIK3C2A|PIK3R1|PRKCE|RAB27A|RABL3|RERG|REST|RGS5|SCIMP|SEMA5A|SHTN1|SIRPB1|SKA…	5540/41905 genes: 13.22%
Biological Process	3	animal organ development	GO:0048513	2.48e-10	1.28e-06	58	ACHE|ADAMTS5|AKT2|ANKRD11|BNC2|CACYBP|CCBE1|CD3D|CDH23|CDK6|CRLF1|DLX1|ERBB4|ETV1|FBXW8|FLRT3|FOXN3|FOXP1|GAB3|GATA1|GIGYF2|GLI3|HDAC9|IGF1|INHBB|KCNC1|KIF27|KLK5|KRT38|KRTAP5-10|KRTAP5-11|KRTAP5-2|KRTAP5-7|LCE2A|MAF|MAN1A2|MYLK3|MYO7A|NF1|NOM1|NR1D2|OVOL1|PBLD|PDPK1|PGAP1|PIK3R1|PNPT1|PRKX|REST|SEMA5A|SERPINC1|SMAD1|SOX17|SOX6|SPG20|TACSTD2|TCF23|TNF	3139/41905 genes: 7.49%
Biological Process	3	negative regulation of cellular metabolic process	GO:0031324	2.86e-10	1.48e-06	46	ABCA7|BANK1|CD55|CDK6|CNOT6L|CR1|DBNDD2|DLX1|DNMT3A|FOXN3|FOXP1|GATA1|GIGYF2|GLI3|HDAC9|INHBB|ITGAV|ITIH2|LIMS1|LIN28B|MAF|MRE11|MSH3|NANOG|NF1|NR1D2|OVOL1|PBLD|PDPK1|PEG3|PPP1R37|PRKCE|REST|SERPINC1|SMAD1|SOCS4|SOX17|SOX6|SUV39H2|SYNJ2BP|TNF|TRIM14|ZBTB33|ZNF268|ZNF345|ZNF354B	2159/41905 genes: 5.15%
Biological Process	2	signal transduction	GO:0007165	4.2e-10	2.17e-06	79	ABCA7|ACTR2|ADM2|AGAP1|AKT2|ASAH2|BANK1|CCBE1|CCDC88A|CD3D|CD55|CDK6|CHM|CNOT6L|CR1|CRLF1|DAPK2|DLX1|ERBB4|FCGR1A|FCGR1B|FGD4|FIGNL1|FLRT3|FMOD|FOXP1|GABRA4|GATA1|GIGYF2|GLI3|GNRHR|GRIA1|GTF2I|IGF1|IL1RL1|IL9R|INHBB|INTS6|ITGAV|KLK5|MRE11|MUC4|MUC7|NF1|NFAT5|NPVF|NR1D2|NXPH2|OR6C65|PBLD|PDCL|PDPK1|PIK3C2A|PIK3R1|PRKCE|RAB27A|RABL3|RERG|RGS5|SCIMP|SEMA5A|SHTN1|SIRPB1|SKAP1|SMAD1|SOCS4|SOX17|SPG20|…	5117/41905 genes: 12.21%
Biological Process	3	tissue development	GO:0009888	6.04e-10	3.13e-06	41	ADAMTSL4|AKT2|BNC2|C1ORF68|CACYBP|CDK6|CRLF1|ERBB4|FBXW8|FLRT3|FOXP1|GATA1|GLI3|HDAC9|IGF1|ITGAV|KLK5|KRT38|KRTAP5-10|KRTAP5-11|KRTAP5-2|KRTAP5-7|LCE2A|MAF|MPP5|MYLK3|MYO7A|NANOG|NF1|NOM1|NR1D2|OVOL1|PBLD|PDPK1|PRKX|SMAD1|SOX17|SOX6|SPG20|TACSTD2|TNF	1821/41905 genes: 4.35%
Biological Process	3	negative regulation of macromolecule metabolic process	GO:0010605	7.13e-10	3.69e-06	45	ABCA7|BANK1|CD55|CDK6|CNOT6L|CR1|DBNDD2|DLX1|DNMT3A|FOXN3|FOXP1|GATA1|GIGYF2|GLI3|HDAC9|INHBB|ITGAV|ITIH2|LIMS1|LIN28B|MAF|MRE11|MSH3|NANOG|NF1|NR1D2|OVOL1|PBLD|PDPK1|PEG3|PRKCE|REST|SERPINC1|SMAD1|SOCS4|SOX17|SOX6|SUV39H2|SYNJ2BP|TNF|TRIM14|ZBTB33|ZNF268|ZNF345|ZNF354B	2142/41905 genes: 5.11%
Biological Process	4	negative regulation of macromolecule biosynthetic process	GO:0010558	1.7e-09	8.78e-06	33	ABCA7|BANK1|CDK6|CNOT6L|DLX1|DNMT3A|FOXN3|FOXP1|GATA1|GIGYF2|GLI3|HDAC9|INHBB|ITGAV|LIMS1|LIN28B|MAF|MRE11|NANOG|NR1D2|OVOL1|PEG3|REST|SMAD1|SOX17|SOX6|SUV39H2|TNF|TRIM14|ZBTB33|ZNF268|ZNF345|ZNF354B	1296/41905 genes: 3.09%
Biological Process	2	regulation of biological quality	GO:0065008	1.79e-09	9.27e-06	57	ABCA7|ABCG2|ACHE|ACTR2|ADM2|ANGPTL4|ANKRD11|APOC4|BRWD1|CD55|CDH23|CDK6|CNOT6L|ERBB4|FGD4|FLRT3|FRMPD4|GATA1|GIGYF2|GRIA1|GTF2I|IGF1|ILDR1|INHBB|ITGAV|MEIOC|MRE11|MUC4|MYLK3|NAA16|NEK2|NF1|NME9|NOP10|NPVF|NR1D2|PBLD|PDPK1|PIK3C2A|PIK3R1|PRKCE|RAB27A|REST|SEMA5A|SERPINC1|SHTN1|SMAD1|SMC5|SOX17|SOX6|SPG20|TBXA2R|TCIRG1|TMX4|TNF|UTS2R|WASF1	3221/41905 genes: 7.69%
Biological Process	2	regulation of developmental process	GO:0050793	2.56e-09	1.33e-05	44	ACTR2|ADM2|ANGPTL4|BRWD1|CCBE1|CCDC88A|CDK6|DLX1|ERBB4|FBXW8|FGD4|FLRT3|FOXP1|GATA1|GLI3|GTF2I|HDAC9|IGF1|ITGAV|LIMS1|MAF|MYLK3|NANOG|NEGR1|NF1|NR1D2|PBLD|PIK3R1|PNPT1|PRKX|REST|SEMA5A|SHTN1|SMAD1|SOX17|SOX6|SPG20|SYNJ2BP|TACSTD2|TBXA2R|TNF|UTS2R|ZNF268|ZNF277	2152/41905 genes: 5.14%
Biological Process	2	negative regulation of metabolic process	GO:0009892	3.43e-09	1.78e-05	46	ABCA7|BANK1|CD55|CDK6|CNOT6L|CR1|DBNDD2|DLX1|DNMT3A|FOXN3|FOXP1|GATA1|GIGYF2|GLI3|HDAC9|INHBB|ITGAV|ITIH2|LIMS1|LIN28B|MAF|MRE11|MSH3|NANOG|NF1|NR1D2|OVOL1|PBLD|PDPK1|PEG3|PPP1R37|PRKCE|REST|SERPINC1|SMAD1|SOCS4|SOX17|SOX6|SUV39H2|SYNJ2BP|TNF|TRIM14|ZBTB33|ZNF268|ZNF345|ZNF354B	2336/41905 genes: 5.57%
Biological Process	2	anatomical structure morphogenesis	GO:0009653	4.54e-09	2.35e-05	45	ACTR2|ADAMTS5|ADM2|ANGPTL4|ANKRD11|BRWD1|CCBE1|DLX1|ERBB4|ETV1|FBXW8|FGD4|FLRT3|FOXN3|FOXP1|GATA1|GLI3|GTF2I|HDAC9|ITGAV|LIMS1|MAP2|MPP5|MYLK3|MYO7A|NANOG|NF1|OR10A4|PIK3R1|PNPT1|PRKX|SDCCAG8|SEMA5A|SHTN1|SMAD1|SOX17|SOX6|SPEM1|SPG20|SYNJ2BP|TACSTD2|TBXA2R|TNF|UTS2R|WASF1	2275/41905 genes: 5.43%
Biological Process	3	protein metabolic process	GO:0019538	4.9e-09	2.54e-05	76	ABCA7|ACHE|ADAMTS5|ADAMTS8|ADAMTSL4|ADM2|AKT2|ALPI|ANKK1|APOC4|ARSH|BANK1|CCBE1|CCDC88A|CCND2|CD55|CDK6|CHM|CHST5|CNOT6L|CR1|CRLF1|DAPK2|DBNDD2|EOGT|ERBB4|FBXO40|FBXW8|GATA1|GGT5|GIGYF2|GLI3|GNPTAB|GXYLT1|HDAC9|HIST1H2BG|IGF1|INHBB|ITGAV|ITIH2|KLK5|LIN28B|MAN1A2|MBOAT4|MRE11|MUC4|MUC7|MYLK3|NAA16|NEGR1|NEK2|NF1|PBLD|PDPK1|PGAP1|PIK3R1|PRKCE|PRKX|PRSS36|RAD18|REST|RPL35|SCIMP|SCRN3|SERPINC1|SETD7|…	5101/41905 genes: 12.17%
Biological Process	3	negative regulation of biosynthetic process	GO:0009890	8.24e-09	4.27e-05	33	ABCA7|BANK1|CDK6|CNOT6L|DLX1|DNMT3A|FOXN3|FOXP1|GATA1|GIGYF2|GLI3|HDAC9|INHBB|ITGAV|LIMS1|LIN28B|MAF|MRE11|NANOG|NR1D2|OVOL1|PEG3|REST|SMAD1|SOX17|SOX6|SUV39H2|TNF|TRIM14|ZBTB33|ZNF268|ZNF345|ZNF354B	1383/41905 genes: 3.30%
Biological Process	2	response to chemical	GO:0042221	8.92e-09	4.62e-05	63	ABCG2|ACTR2|AKT2|CACYBP|CARF|CCBE1|CD55|CD68|CDK6|DAPK2|DNMT3A|ERBB4|ETV1|FCGR1A|FCGR1B|FLRT3|FMO1|FMOD|FOXP1|GABRA4|GATA1|GLI3|GNRHR|HDAC9|IL1RL1|IL9R|INHBB|IPCEF1|ITGAV|KCNC1|LIMS1|LIN28B|MYLK3|NR1D2|OR10A4|OR11G2|OR4D11|OR5AN1|OR5B21|OR6C65|PARP9|PBLD|PDPK1|PIK3C2A|PIK3R1|PNPT1|PRKCE|RERG|REST|SEMA5A|SERPINC1|SETD7|SMAD1|SOX6|SPG20|SUV39H2|TBXA2R|TCIRG1|TMEM67|TNF|TNFRSF10B|UTS2R|ZNF277	3920/41905 genes: 9.35%
Biological Process	4	negative regulation of cellular biosynthetic process	GO:0031327	2.02e-08	0.000104	32	ABCA7|BANK1|CDK6|CNOT6L|DLX1|DNMT3A|FOXN3|FOXP1|GATA1|GIGYF2|GLI3|HDAC9|INHBB|LIMS1|LIN28B|MAF|MRE11|NANOG|NR1D2|OVOL1|PEG3|REST|SMAD1|SOX17|SOX6|SUV39H2|TNF|TRIM14|ZBTB33|ZNF268|ZNF345|ZNF354B	1362/41905 genes: 3.25%
Biological Process	3	regulation of cell motility	GO:2000145	2.12e-08	0.00011	22	AKT2|CCBE1|CDK6|DAPK2|ERBB4|FOXP1|HDAC9|IGF1|ITGAV|NF1|PBLD|PDPK1|PIK3R1|PRKCE|PRKX|SEMA5A|SHTN1|SYNJ2BP|TACSTD2|TCAF2|TNF|ZNF268	690/41905 genes: 1.65%
Biological Process	4	regulation of cell migration	GO:0030334	2.83e-08	0.000146	21	AKT2|CCBE1|DAPK2|ERBB4|FOXP1|HDAC9|IGF1|ITGAV|NF1|PBLD|PDPK1|PIK3R1|PRKCE|PRKX|SEMA5A|SHTN1|SYNJ2BP|TACSTD2|TCAF2|TNF|ZNF268	641/41905 genes: 1.53%
Biological Process	3	negative regulation of nitrogen compound metabolic process	GO:0051172	3.56e-08	0.000184	32	ABCA7|BANK1|CDK6|CNOT6L|DLX1|DNMT3A|FOXN3|FOXP1|GATA1|GIGYF2|GLI3|HDAC9|LIMS1|LIN28B|MAF|MRE11|MSH3|NANOG|NR1D2|OVOL1|PEG3|REST|SMAD1|SOX17|SOX6|SUV39H2|TNF|TRIM14|ZBTB33|ZNF268|ZNF345|ZNF354B	1396/41905 genes: 3.33%
Biological Process	3	movement of cell or subcellular component	GO:0006928	3.91e-08	0.000203	37	ACTR2|AKT2|CCBE1|CCDC88A|CDK6|DAPK2|ERBB4|ETV1|FLRT3|FOXP1|GLI3|HDAC9|IGF1|ITGAV|KIF1B|KIF27|MYO7A|NF1|OR10A4|PARP9|PBLD|PDPK1|PIK3R1|PRKCE|PRKX|SDCCAG8|SEMA5A|SHTN1|SOX17|SPEM1|SYNJ2BP|TACSTD2|TCAF2|TNF|TNFRSF10B|WASF1|ZNF268	1787/41905 genes: 4.26%
Biological Process	3	cell death	GO:0008219	4.4e-08	0.000228	39	ADAMTSL4|AKT2|ANGPTL4|ASAH2|CACYBP|CCND2|CHM|CRLF1|DAPK2|DLX1|DNMT3A|ERBB4|FGD4|FIGNL1|FOXP1|GATA1|GLI3|IGF1|INHBB|ITGAV|KIF1B|KLK5|KRT38|LGALS13|LGALS14|LGALS16|MRE11|NAA16|NF1|PDPK1|PEG3|PIK3R1|PRKCE|RAD18|REST|SEMA5A|TNF|TNFRSF10B|ZNF268	1956/41905 genes: 4.67%
Biological Process	3	regulation of multicellular organismal development	GO:2000026	4.74e-08	0.000245	35	ACTR2|ADM2|ANGPTL4|CCBE1|CCDC88A|CDK6|DLX1|ERBB4|FBXW8|FLRT3|FOXP1|GATA1|GLI3|GTF2I|HDAC9|IGF1|MAF|NEGR1|NF1|NR1D2|PBLD|PIK3R1|PRKX|REST|SEMA5A|SHTN1|SMAD1|SOX17|SOX6|SPG20|SYNJ2BP|TACSTD2|TBXA2R|TNF|UTS2R	1643/41905 genes: 3.92%
Biological Process	3	regulation of cell death	GO:0010941	5.42e-08	0.00028	32	ADAMTSL4|ANGPTL4|CACYBP|CCND2|CHM|CRLF1|DAPK2|DLX1|DNMT3A|ERBB4|FGD4|FIGNL1|FOXP1|GATA1|GLI3|IGF1|INHBB|ITGAV|LGALS13|LGALS14|LGALS16|MRE11|NAA16|NF1|PDPK1|PIK3R1|RAD18|REST|SEMA5A|TNF|TNFRSF10B|ZNF268	1422/41905 genes: 3.39%
Biological Process	2	establishment of localization	GO:0051234	6.62e-08	0.000343	70	ABCA7|ABCG2|ACHE|ACTR2|ADAMTS8|AGAP1|AKT2|APOC4|ARFIP1|BANK1|CD55|CD68|CDH23|CHM|CR1|CRACR2B|ERBB4|FCGR1A|FCGR1B|FIP1L1|FOXP1|GABRA4|GLI3|GNPTAB|GOLGA3|GRIA1|HOOK1|IGF1|IL1RL1|IL9R|ILDR1|INHBB|IPCEF1|ITGAV|KCNC1|KIF1B|LIMS1|MEIOC|MPP5|MREG|MYO7A|NF1|NIPAL1|NPVF|PBLD|PDPK1|PGAP1|PIK3C2A|PIK3R1|PKD1L1|PNPT1|PRELID2|PRKCE|RAB27A|REST|RPAIN|RPL35|SEMA5A|SERPINC1|SIRPB1|SLC16A7|SLC22A7|SLC25A48|STX17|…	4821/41905 genes: 11.50%
Biological Process	5	negative regulation of cellular macromolecule biosynthetic process	GO:2000113	7.29e-08	0.000378	29	ABCA7|BANK1|CDK6|CNOT6L|DLX1|DNMT3A|FOXN3|FOXP1|GATA1|GIGYF2|GLI3|HDAC9|LIMS1|LIN28B|MAF|MRE11|NR1D2|OVOL1|PEG3|REST|SMAD1|SOX17|SOX6|SUV39H2|TNF|ZBTB33|ZNF268|ZNF345|ZNF354B	1218/41905 genes: 2.91%
Biological Process	4	macromolecule modification	GO:0043412	8e-08	0.000414	59	ABCA7|ADAMTS5|ADAMTSL4|ADM2|AKT2|ALPI|ANKK1|ARSH|BANK1|BRDT|C20ORF173|CCDC88A|CCND2|CDK6|CHM|CHST5|CRLF1|DAPK2|DBNDD2|DNMT3A|EOGT|ERBB4|FBXO40|FBXW8|GATA1|GNPTAB|GXYLT1|HDAC9|HIST1H2BG|IGF1|ITGAV|MAN1A2|MBOAT4|MRE11|MUC4|MUC7|MYLK3|NAA16|NEGR1|NEK2|NF1|NOP10|PBLD|PDPK1|PGAP1|PIK3R1|PRKCE|PRKX|RAD18|REST|SCIMP|SETD7|SMAD1|SOCS4|SUV39H2|SYNJ2BP|TNF|TNFRSF10B|USP45	3778/41905 genes: 9.02%
Biological Process	3	cellular response to chemical stimulus	GO:0070887	8.65e-08	0.000448	45	ACTR2|AKT2|CACYBP|CARF|CCBE1|CD55|CD68|CDK6|DAPK2|DNMT3A|ERBB4|FCGR1A|FCGR1B|FLRT3|FMO1|FMOD|FOXP1|GATA1|GNRHR|HDAC9|IL1RL1|IL9R|INHBB|KCNC1|LIMS1|LIN28B|MYLK3|NR1D2|PBLD|PDPK1|PIK3C2A|PIK3R1|PNPT1|PRKCE|REST|SEMA5A|SMAD1|SOX6|SPG20|SUV39H2|TBXA2R|TCIRG1|TNF|TNFRSF10B|ZNF277	2515/41905 genes: 6.00%
Biological Process	2	regulation of locomotion	GO:0040012	9.5e-08	0.000492	22	AKT2|CCBE1|CDK6|DAPK2|ERBB4|FOXP1|HDAC9|IGF1|ITGAV|NF1|PBLD|PDPK1|PIK3R1|PRKCE|PRKX|SEMA5A|SHTN1|SYNJ2BP|TACSTD2|TCAF2|TNF|ZNF268	752/41905 genes: 1.79%
Biological Process	3	regulation of cell differentiation	GO:0045595	9.53e-08	0.000493	32	ACTR2|CCDC88A|CDK6|DLX1|ERBB4|FBXW8|FOXP1|GATA1|GLI3|HDAC9|IGF1|ITGAV|LIMS1|MAF|MYLK3|NANOG|NEGR1|NF1|NR1D2|PBLD|PIK3R1|PRKX|REST|SEMA5A|SHTN1|SMAD1|SOX17|SOX6|SPG20|TACSTD2|TNF|ZNF268	1458/41905 genes: 3.48%
Biological Process	4	programmed cell death	GO:0012501	9.59e-08	0.000496	37	ADAMTSL4|AKT2|ANGPTL4|ASAH2|CCND2|CHM|CRLF1|DAPK2|DLX1|DNMT3A|ERBB4|FGD4|FIGNL1|FOXP1|GATA1|GLI3|IGF1|INHBB|ITGAV|KIF1B|KLK5|KRT38|LGALS13|LGALS14|LGALS16|MRE11|NAA16|NF1|PDPK1|PEG3|PIK3R1|PRKCE|REST|SEMA5A|TNF|TNFRSF10B|ZNF268	1852/41905 genes: 4.42%
Biological Process	4	cellular protein metabolic process	GO:0044267	9.73e-08	0.000504	66	ABCA7|ADAMTS5|ADAMTSL4|ADM2|AKT2|ALPI|ANKK1|ARSH|BANK1|CCBE1|CCDC88A|CCND2|CD55|CDK6|CHM|CHST5|CNOT6L|CR1|CRLF1|DAPK2|DBNDD2|EOGT|ERBB4|FBXO40|FBXW8|GATA1|GIGYF2|GNPTAB|GXYLT1|HDAC9|HIST1H2BG|IGF1|ITGAV|ITIH2|LIN28B|MAN1A2|MBOAT4|MRE11|MUC4|MUC7|MYLK3|NAA16|NEGR1|NEK2|NF1|PBLD|PDPK1|PGAP1|PIK3R1|PRKCE|PRKX|RAD18|REST|RPL35|SCIMP|SERPINC1|SETD7|SMAD1|SOCS4|SUV39H2|SYNJ2BP|TCIRG1|TMEM67|TNF|TNFRSF1…	4474/41905 genes: 10.68%
Biological Process	3	regulation of cellular component movement	GO:0051270	9.95e-08	0.000515	22	AKT2|CCBE1|CDK6|DAPK2|ERBB4|FOXP1|HDAC9|IGF1|ITGAV|NF1|PBLD|PDPK1|PIK3R1|PRKCE|PRKX|SEMA5A|SHTN1|SYNJ2BP|TACSTD2|TCAF2|TNF|ZNF268	754/41905 genes: 1.80%
Biological Process	3	organelle organization	GO:0006996	1.22e-07	0.00063	53	ACTR2|AKT2|BRDT|BRWD1|CCDC88A|CEP126|CNOT6L|DNMT3A|ERBB4|FAM92A|FBXW8|FGD4|GATA1|GINS4|GNPTAB|GRIA1|HDAC9|HIST1H2BG|HOOK1|IGF1|IL9R|KIF27|MAP2|MEIOC|MRE11|MSH3|MYLK3|MYO7A|NEK2|NF1|NOP10|PADI1|PDPK1|PIK3R1|PNPT1|PRKCE|RAB27A|REST|SDCCAG8|SEMA5A|SETD7|SGO1|SHTN1|SMC5|SPG20|STX17|SUV39H2|SYNJ2BP|TACSTD2|TCIRG1|TMEM67|TNF|WASF1	3263/41905 genes: 7.79%
Biological Process	2	regulation of response to stimulus	GO:0048583	1.31e-07	0.000678	55	ABCA7|ACTR2|AKT2|BANK1|CCBE1|CD3D|CD55|CDK6|CLEC4G|CR1|CRLF1|DAPK2|DLX1|ERBB4|FCGR1A|FCGR1B|FGD4|FIGNL1|FOXP1|GABRA4|GATA1|GLI3|GTF2I|IGF1|IL1RL1|INHBB|ITGAV|KLK5|MRE11|MUC4|MUC7|NF1|NFAT5|NR1D2|PARP9|PBLD|PDCL|PDPK1|PIK3R1|PNPT1|PRKCE|RGS5|SCIMP|SEMA5A|SERPINC1|SKAP1|SOCS4|SOX17|SPG20|SYNJ2BP|TBXA2R|TNF|TNFAIP8L1|TNFRSF10B|ZNF277	3456/41905 genes: 8.25%
Biological Process	3	cell surface receptor signaling pathway	GO:0007166	1.36e-07	0.000702	44	ABCA7|ACTR2|AKT2|CCBE1|CD3D|CD55|CDK6|CR1|DLX1|ERBB4|FCGR1A|FCGR1B|FLRT3|FMOD|GATA1|GIGYF2|GLI3|GRIA1|IGF1|IL1RL1|IL9R|INHBB|ITGAV|MUC4|MUC7|NF1|PBLD|PDPK1|PIK3C2A|PIK3R1|PRKCE|SHTN1|SIRPB1|SKAP1|SMAD1|SOCS4|SOX17|SPG20|SYNJ2BP|TACSTD2|TCIRG1|TNF|TNFRSF10B|ZBTB33	2468/41905 genes: 5.89%
Biological Process	3	cellular component morphogenesis	GO:0032989	1.56e-07	0.000806	24	ACTR2|BRWD1|ETV1|FBXW8|FGD4|FLRT3|GATA1|GLI3|ITGAV|LIMS1|MAP2|MPP5|MYLK3|MYO7A|OR10A4|PIK3R1|PNPT1|SEMA5A|SHTN1|SOX17|SOX6|SPG20|TACSTD2|WASF1	907/41905 genes: 2.16%
Biological Process	5	apoptotic process	GO:0006915	1.61e-07	0.000832	35	ADAMTSL4|AKT2|ANGPTL4|ASAH2|CCND2|CHM|CRLF1|DAPK2|DLX1|DNMT3A|ERBB4|FGD4|FIGNL1|FOXP1|GATA1|GLI3|IGF1|INHBB|ITGAV|KIF1B|LGALS13|LGALS14|LGALS16|MRE11|NAA16|NF1|PDPK1|PEG3|PIK3R1|PRKCE|REST|SEMA5A|TNF|TNFRSF10B|ZNF268	1729/41905 genes: 4.13%
Biological Process	2	cell motility	GO:0048870	1.69e-07	0.000876	30	AKT2|CCBE1|CCDC88A|CDK6|DAPK2|ERBB4|FLRT3|FOXP1|GLI3|HDAC9|IGF1|ITGAV|NF1|PARP9|PBLD|PDPK1|PIK3R1|PRKCE|PRKX|SDCCAG8|SEMA5A|SHTN1|SOX17|SPEM1|SYNJ2BP|TACSTD2|TCAF2|TNF|TNFRSF10B|ZNF268	1343/41905 genes: 3.20%
Biological Process	2	localization of cell	GO:0051674	1.69e-07	0.000876	30	AKT2|CCBE1|CCDC88A|CDK6|DAPK2|ERBB4|FLRT3|FOXP1|GLI3|HDAC9|IGF1|ITGAV|NF1|PARP9|PBLD|PDPK1|PIK3R1|PRKCE|PRKX|SDCCAG8|SEMA5A|SHTN1|SOX17|SPEM1|SYNJ2BP|TACSTD2|TCAF2|TNF|TNFRSF10B|ZNF268	1343/41905 genes: 3.20%
Biological Process	3	positive regulation of macromolecule metabolic process	GO:0010604	1.72e-07	0.000891	46	ABCA7|ADM2|AKT2|BANK1|BRDT|CACYBP|CARF|CCBE1|CCDC88A|CCND2|CD3D|CDK6|CR1|CRLF1|ERBB4|ETV1|GATA1|GLI3|IGF1|ITGAV|LIMS1|MAF|MRE11|NAA16|NANOG|NEK2|NFAT5|NR1D2|PDPK1|PEG3|PIK3R1|PNPT1|PRKCE|RAB27A|REST|SCIMP|SETD7|SKAP1|SMAD1|SOCS4|SOX17|SOX6|TEAD1|TNF|TNFRSF10B|ZNF268	2665/41905 genes: 6.36%
Biological Process	2	cell proliferation	GO:0008283	2.43e-07	0.00126	36	ACHE|ADAMTS8|CCDC88A|CCND2|CD55|CDK6|CLEC4G|CNOT6L|CRLF1|ERBB4|FBXW8|FIGNL1|FOXP1|GATA1|GINS4|GLI3|IGF1|IL9R|ITGAV|MRE11|NANOG|NF1|OVOL1|PBLD|PRKX|RERG|REST|SEMA5A|SMAD1|SOX17|SYNJ2BP|TACSTD2|TCIRG1|TNF|UTS2R|ZNF268	1841/41905 genes: 4.39%
Biological Process	3	transport	GO:0006810	2.62e-07	0.00136	67	ABCA7|ABCG2|ACHE|ACTR2|ADAMTS8|AGAP1|AKT2|APOC4|ARFIP1|BANK1|CD55|CD68|CDH23|CHM|CR1|CRACR2B|ERBB4|FCGR1A|FCGR1B|FIP1L1|FOXP1|GABRA4|GLI3|GNPTAB|GOLGA3|GRIA1|HOOK1|IGF1|IL1RL1|IL9R|ILDR1|INHBB|IPCEF1|ITGAV|KCNC1|KIF1B|MREG|MYO7A|NF1|NIPAL1|NPVF|PBLD|PDPK1|PGAP1|PIK3C2A|PIK3R1|PKD1L1|PNPT1|PRELID2|PRKCE|RAB27A|REST|RPAIN|RPL35|SEMA5A|SERPINC1|SIRPB1|SLC16A7|SLC22A7|SLC25A48|STX17|SYNJ2BP|TCAF2|TCI…	4696/41905 genes: 11.21%
Biological Process	4	negative regulation of gene expression	GO:0010629	2.7e-07	0.0014	30	BANK1|CD55|CDK6|CNOT6L|CR1|DLX1|DNMT3A|FOXN3|FOXP1|GATA1|GIGYF2|GLI3|HDAC9|LIMS1|LIN28B|MAF|NR1D2|OVOL1|PEG3|REST|SMAD1|SOX17|SOX6|SUV39H2|TNF|TRIM14|ZBTB33|ZNF268|ZNF345|ZNF354B	1373/41905 genes: 3.28%
Biological Process	3	cell migration	GO:0016477	2.86e-07	0.00148	28	AKT2|CCBE1|CCDC88A|DAPK2|ERBB4|FLRT3|FOXP1|GLI3|HDAC9|IGF1|ITGAV|NF1|PARP9|PBLD|PDPK1|PIK3R1|PRKCE|PRKX|SDCCAG8|SEMA5A|SHTN1|SOX17|SYNJ2BP|TACSTD2|TCAF2|TNF|TNFRSF10B|ZNF268	1226/41905 genes: 2.93%
Biological Process	6	transcription from RNA polymerase II promoter	GO:0006366	2.96e-07	0.00153	37	CARF|CD3D|CDK6|DLX1|DNMT3A|ETV1|FAM200A|FIP1L1|FOXP1|GATA1|GLI3|GTF2I|HDAC9|IGF1|INTS6|INTS8|MAF|NANOG|NFAT5|NR1D2|OVOL1|PEG3|PIK3R1|REST|SCAF1|SKAP1|SMAD1|SOX17|SOX6|SP4|SPG20|SUV39H2|TEAD1|TNF|ZNF268|ZNF345|ZNF354B	1939/41905 genes: 4.63%
Biological Process	2	macromolecule localization	GO:0033036	3.11e-07	0.00161	45	ABCA7|ACHE|AGAP1|AKT2|APOC4|ARFIP1|BANK1|CCDC88A|CHM|CRACR2B|ERBB4|FIP1L1|FOXP1|GLI3|GNPTAB|HOOK1|IGF1|IL1RL1|IL9R|INHBB|ITGAV|LIMS1|LZTFL1|MPP5|MYO7A|NF1|NOP10|PBLD|PDPK1|PGAP1|PIK3R1|PNPT1|PRELID2|PRKCE|RAB27A|REST|RPAIN|RPL35|SEMA5A|SKAP1|STX17|SYNJ2BP|TCAF2|TCIRG1|TNF	2632/41905 genes: 6.28%
Biological Process	5	cellular protein modification process	GO:0006464	3.28e-07	0.0017	55	ABCA7|ADAMTS5|ADAMTSL4|ADM2|AKT2|ALPI|ANKK1|ARSH|BANK1|CCDC88A|CCND2|CDK6|CHM|CHST5|CRLF1|DAPK2|DBNDD2|EOGT|ERBB4|FBXO40|FBXW8|GATA1|GNPTAB|GXYLT1|HDAC9|HIST1H2BG|IGF1|ITGAV|MAN1A2|MBOAT4|MRE11|MUC4|MUC7|MYLK3|NAA16|NEGR1|NEK2|NF1|PBLD|PDPK1|PGAP1|PIK3R1|PRKCE|PRKX|RAD18|REST|SCIMP|SETD7|SMAD1|SOCS4|SUV39H2|SYNJ2BP|TNF|TNFRSF10B|USP45	3556/41905 genes: 8.49%
Biological Process	4	protein modification process	GO:0036211	3.28e-07	0.0017	55	ABCA7|ADAMTS5|ADAMTSL4|ADM2|AKT2|ALPI|ANKK1|ARSH|BANK1|CCDC88A|CCND2|CDK6|CHM|CHST5|CRLF1|DAPK2|DBNDD2|EOGT|ERBB4|FBXO40|FBXW8|GATA1|GNPTAB|GXYLT1|HDAC9|HIST1H2BG|IGF1|ITGAV|MAN1A2|MBOAT4|MRE11|MUC4|MUC7|MYLK3|NAA16|NEGR1|NEK2|NF1|PBLD|PDPK1|PGAP1|PIK3R1|PRKCE|PRKX|RAD18|REST|SCIMP|SETD7|SMAD1|SOCS4|SUV39H2|SYNJ2BP|TNF|TNFRSF10B|USP45	3556/41905 genes: 8.49%
Biological Process	2	regulation of localization	GO:0032879	3.57e-07	0.00185	41	ABCA7|ACHE|AKT2|APOC4|ARFIP1|BANK1|CCBE1|CCDC88A|CDK6|CRACR2B|DAPK2|ERBB4|FOXP1|GLI3|HDAC9|IGF1|IL1RL1|IL9R|ILDR1|INHBB|ITGAV|KCNC1|LZTFL1|NF1|NOP10|NPVF|PBLD|PDPK1|PIK3R1|PRKCE|PRKX|RAB27A|REST|SEMA5A|SHTN1|SYNJ2BP|TACSTD2|TCAF2|TNF|UTS2R|ZNF268	2294/41905 genes: 5.47%
Biological Process	2	regulation of multicellular organismal process	GO:0051239	3.67e-07	0.0019	44	ABCA7|ACTR2|ADM2|ANGPTL4|BANK1|CCBE1|CCDC88A|CDK6|DLX1|ERBB4|FBXW8|FLRT3|FOXP1|GATA1|GLI3|GTF2I|HDAC9|IGF1|IL1RL1|INHBB|MAF|MRE11|NEGR1|NF1|NPVF|NR1D2|PBLD|PDPK1|PIK3R1|PRKCE|PRKX|REST|SEMA5A|SERPINC1|SHTN1|SMAD1|SOX17|SOX6|SPG20|SYNJ2BP|TACSTD2|TBXA2R|TNF|UTS2R	2559/41905 genes: 6.11%
Biological Process	2	single-organism localization	GO:1902578	3.72e-07	0.00193	49	ABCA7|ABCG2|ACHE|ACTR2|AKT2|APOC4|ARFIP1|BANK1|CD55|CD68|CR1|ERBB4|FCGR1A|FOXP1|GLI3|GNPTAB|GRIA1|IGF1|IL1RL1|ILDR1|INHBB|IPCEF1|ITGAV|KCNC1|KIF1B|MPP5|MREG|MYO7A|NF1|NPVF|PBLD|PDPK1|PGAP1|PIK3C2A|PIK3R1|PNPT1|PRELID2|PRKCE|RAB27A|REST|RPAIN|SEMA5A|SERPINC1|SIRPB1|SKAP1|SLC16A7|TCIRG1|TNF|UTS2R	3011/41905 genes: 7.19%
Biological Process	5	regulation of apoptotic process	GO:0042981	3.74e-07	0.00193	29	ADAMTSL4|ANGPTL4|CCND2|CHM|CRLF1|DAPK2|DLX1|ERBB4|FGD4|FIGNL1|FOXP1|GATA1|GLI3|IGF1|INHBB|ITGAV|LGALS13|LGALS14|LGALS16|MRE11|NAA16|NF1|PDPK1|PIK3R1|REST|SEMA5A|TNF|TNFRSF10B|ZNF268	1318/41905 genes: 3.15%
Biological Process	4	regulation of programmed cell death	GO:0043067	4.42e-07	0.00229	29	ADAMTSL4|ANGPTL4|CCND2|CHM|CRLF1|DAPK2|DLX1|ERBB4|FGD4|FIGNL1|FOXP1|GATA1|GLI3|IGF1|INHBB|ITGAV|LGALS13|LGALS14|LGALS16|MRE11|NAA16|NF1|PDPK1|PIK3R1|REST|SEMA5A|TNF|TNFRSF10B|ZNF268	1329/41905 genes: 3.17%
Biological Process	2	positive regulation of metabolic process	GO:0009893	4.59e-07	0.00238	47	ABCA7|ADM2|AKT2|BANK1|BRDT|CACYBP|CARF|CCBE1|CCDC88A|CCND2|CD3D|CDK6|CR1|CRLF1|ERBB4|ETV1|GATA1|GLI3|IGF1|ITGAV|LIMS1|MAF|MRE11|NAA16|NANOG|NEK2|NF1|NFAT5|NR1D2|PDPK1|PEG3|PIK3R1|PNPT1|PRKCE|RAB27A|REST|SCIMP|SETD7|SKAP1|SMAD1|SOCS4|SOX17|SOX6|TEAD1|TNF|TNFRSF10B|ZNF268	2850/41905 genes: 6.80%
Biological Process	1	locomotion	GO:0040011	5.52e-07	0.00286	32	AKT2|CCBE1|CCDC88A|CDK6|DAPK2|ERBB4|ETV1|FLRT3|FOXP1|GLI3|HDAC9|IGF1|ITGAV|NF1|OR10A4|PARP9|PBLD|PDPK1|PIK3R1|PRKCE|PRKX|SDCCAG8|SEMA5A|SHTN1|SOX17|SPEM1|SYNJ2BP|TACSTD2|TCAF2|TNF|TNFRSF10B|ZNF268	1579/41905 genes: 3.77%
Biological Process	4	circulatory system development	GO:0072359	5.92e-07	0.00306	23	ADM2|ANGPTL4|CACYBP|CCBE1|ERBB4|FBXW8|FLRT3|GLI3|GTF2I|HDAC9|IGF1|ITGAV|MYLK3|NF1|PRKX|REST|SEMA5A|SMAD1|SOX17|SOX6|SYNJ2BP|TBXA2R|UTS2R	907/41905 genes: 2.16%
Biological Process	3	single-organism transport	GO:0044765	6.23e-07	0.00323	47	ABCA7|ABCG2|ACHE|ACTR2|AKT2|APOC4|ARFIP1|BANK1|CD55|CD68|CR1|ERBB4|FCGR1A|FOXP1|GLI3|GNPTAB|GRIA1|IGF1|IL1RL1|ILDR1|INHBB|IPCEF1|ITGAV|KCNC1|KIF1B|MREG|MYO7A|NF1|NPVF|PBLD|PDPK1|PGAP1|PIK3C2A|PIK3R1|PNPT1|PRELID2|PRKCE|RAB27A|REST|RPAIN|SEMA5A|SERPINC1|SIRPB1|SLC16A7|TCIRG1|TNF|UTS2R	2881/41905 genes: 6.88%
Biological Process	3	negative regulation of cell communication	GO:0010648	6.63e-07	0.00343	26	ACHE|BANK1|DLX1|ERBB4|FIGNL1|FOXP1|GATA1|GLI3|GRIA1|IGF1|IL1RL1|INHBB|ITGAV|NF1|NPVF|PBLD|PDPK1|REST|RGS5|SOCS4|SOX17|SPG20|SYNJ2BP|TNF|TNFAIP8L1|TNFRSF10B	1129/41905 genes: 2.69%
Biological Process	3	regulation of epithelial cell migration	GO:0010632	6.8e-07	0.00352	10	CCBE1|FOXP1|HDAC9|NF1|PBLD|PDPK1|PRKCE|SEMA5A|SYNJ2BP|TACSTD2	167/41905 genes: 0.40%
Biological Process	2	negative regulation of signaling	GO:0023057	7.09e-07	0.00367	26	ACHE|BANK1|DLX1|ERBB4|FIGNL1|FOXP1|GATA1|GLI3|GRIA1|IGF1|IL1RL1|INHBB|ITGAV|NF1|NPVF|PBLD|PDPK1|REST|RGS5|SOCS4|SOX17|SPG20|SYNJ2BP|TNF|TNFAIP8L1|TNFRSF10B	1133/41905 genes: 2.70%
Biological Process	4	ameboidal-type cell migration	GO:0001667	7.9e-07	0.00409	13	CCBE1|ERBB4|FOXP1|HDAC9|NF1|PBLD|PDPK1|PRKCE|PRKX|SEMA5A|SOX17|SYNJ2BP|TACSTD2	307/41905 genes: 0.73%
Biological Process	2	cell adhesion	GO:0007155	8.19e-07	0.00424	31	ACHE|ARFIP1|CD3D|CD55|CDH23|CDH8|CDK6|CLEC4G|FLRT3|GATA1|GIGYF2|GLI3|GOLGA3|IGF1|ITGAV|LIMS1|MRE11|MUC4|NEGR1|NF1|PCDHAC1|PDPK1|PIK3R1|PKD1L1|PRKCE|PRKX|SEMA5A|SHTN1|SKAP1|TACSTD2|TNF	1528/41905 genes: 3.65%
Biological Process	1	biological adhesion	GO:0022610	8.89e-07	0.0046	31	ACHE|ARFIP1|CD3D|CD55|CDH23|CDH8|CDK6|CLEC4G|FLRT3|GATA1|GIGYF2|GLI3|GOLGA3|IGF1|ITGAV|LIMS1|MRE11|MUC4|NEGR1|NF1|PCDHAC1|PDPK1|PIK3R1|PKD1L1|PRKCE|PRKX|SEMA5A|SHTN1|SKAP1|TACSTD2|TNF	1534/41905 genes: 3.66%
Biological Process	3	positive regulation of cellular metabolic process	GO:0031325	9e-07	0.00466	44	ABCA7|AKT2|BANK1|BRDT|CACYBP|CARF|CCBE1|CCDC88A|CCND2|CD3D|CR1|CRLF1|ERBB4|ETV1|GATA1|GLI3|IGF1|ITGAV|MAF|MRE11|NAA16|NANOG|NEK2|NF1|NFAT5|NR1D2|PDPK1|PEG3|PIK3R1|PNPT1|PRKCE|RAB27A|REST|SCIMP|SETD7|SKAP1|SMAD1|SOCS4|SOX17|SOX6|TEAD1|TNF|TNFRSF10B|ZNF268	2646/41905 genes: 6.31%
Biological Process	4	positive regulation of cell migration	GO:0030335	9.06e-07	0.00469	14	AKT2|CCBE1|DAPK2|FOXP1|HDAC9|IGF1|ITGAV|PIK3R1|PRKCE|SEMA5A|SHTN1|TCAF2|TNF|ZNF268	363/41905 genes: 0.87%
Biological Process	3	response to organic substance	GO:0010033	1.03e-06	0.00536	44	ACTR2|AKT2|CACYBP|CCBE1|CD55|CD68|CDK6|DNMT3A|ERBB4|FCGR1A|FCGR1B|FLRT3|FMO1|FMOD|FOXP1|GATA1|GNRHR|HDAC9|IL1RL1|IL9R|INHBB|KCNC1|LIMS1|LIN28B|MYLK3|NR1D2|PARP9|PBLD|PDPK1|PIK3C2A|PIK3R1|PNPT1|PRKCE|RERG|REST|SETD7|SMAD1|SOX6|SPG20|TBXA2R|TCIRG1|TMEM67|TNF|TNFRSF10B	2660/41905 genes: 6.35%
Biological Process	4	cellular response to organic substance	GO:0071310	1.14e-06	0.00591	37	ACTR2|AKT2|CCBE1|CD55|CD68|CDK6|DNMT3A|ERBB4|FCGR1A|FCGR1B|FLRT3|FMOD|FOXP1|GATA1|GNRHR|HDAC9|IL1RL1|IL9R|INHBB|LIMS1|LIN28B|MYLK3|NR1D2|PBLD|PDPK1|PIK3C2A|PIK3R1|PNPT1|PRKCE|REST|SMAD1|SOX6|SPG20|TBXA2R|TCIRG1|TNF|TNFRSF10B	2052/41905 genes: 4.90%
Biological Process	5	epithelial cell migration	GO:0010631	1.29e-06	0.00666	11	CCBE1|FOXP1|HDAC9|NF1|PBLD|PDPK1|PRKCE|PRKX|SEMA5A|SYNJ2BP|TACSTD2	223/41905 genes: 0.53%
Biological Process	3	homeostatic process	GO:0042592	1.41e-06	0.00731	30	ABCG2|ANGPTL4|ANKRD11|APOC4|CD55|CDH23|CDK6|GATA1|GIGYF2|GRIA1|GTF2I|ITGAV|MRE11|MUC4|NEK2|NF1|NME9|NOP10|NR1D2|PBLD|PDPK1|PIK3R1|PRKCE|SMAD1|SMC5|SOX6|TCIRG1|TMX4|TNF|UTS2R	1488/41905 genes: 3.55%
Biological Process	3	positive regulation of cell motility	GO:2000147	1.41e-06	0.00732	14	AKT2|CCBE1|DAPK2|FOXP1|HDAC9|IGF1|ITGAV|PIK3R1|PRKCE|SEMA5A|SHTN1|TCAF2|TNF|ZNF268	377/41905 genes: 0.90%
Biological Process	3	regulation of anatomical structure morphogenesis	GO:0022603	1.42e-06	0.00735	22	ACTR2|ADM2|ANGPTL4|BRWD1|CCBE1|FBXW8|FGD4|FOXP1|GTF2I|HDAC9|LIMS1|MYLK3|NF1|SEMA5A|SHTN1|SOX17|SPG20|SYNJ2BP|TACSTD2|TBXA2R|TNF|UTS2R	884/41905 genes: 2.11%
Biological Process	4	epithelium migration	GO:0090132	1.46e-06	0.00758	11	CCBE1|FOXP1|HDAC9|NF1|PBLD|PDPK1|PRKCE|PRKX|SEMA5A|SYNJ2BP|TACSTD2	226/41905 genes: 0.54%
Biological Process	3	positive regulation of cellular component organization	GO:0051130	1.53e-06	0.00791	25	ABCA7|ACTR2|AKT2|CCDC88A|CNOT6L|FBXW8|FLRT3|FRMPD4|IGF1|IL9R|ITGAV|LIMS1|MRE11|MYLK3|NEGR1|NEK2|PDPK1|PIK3R1|PRKCE|RAB27A|SEMA5A|SHTN1|SMC5|TNF|WASF1	1106/41905 genes: 2.64%
Biological Process	3	protein localization	GO:0008104	1.54e-06	0.00797	40	ABCA7|ACHE|AGAP1|AKT2|ARFIP1|BANK1|CCDC88A|CHM|CRACR2B|ERBB4|FIP1L1|FOXP1|GLI3|GNPTAB|HOOK1|IGF1|IL1RL1|IL9R|INHBB|LIMS1|LZTFL1|MPP5|MYO7A|NF1|PBLD|PDPK1|PGAP1|PIK3R1|PRKCE|RAB27A|REST|RPAIN|RPL35|SEMA5A|SKAP1|STX17|SYNJ2BP|TCAF2|TCIRG1|TNF	2341/41905 genes: 5.59%
Biological Process	2	cellular component biogenesis	GO:0044085	1.58e-06	0.00816	43	ABCA7|ACHE|ACTR2|ANGPTL4|CCDC88A|CEP126|CNOT6L|FAM92A|FGD4|FLRT3|FMOD|GRIA1|GTPBP10|HEATR1|HIST1H2BG|KCNC1|KCTD12|KIF27|KRR1|LIMS1|MEIOC|MPP5|MYLK3|MYO7A|NEK2|NOP10|PDCL|PDPK1|PIK3C2A|PIK3R1|PNPT1|PRKCE|RAB27A|REST|RPL35|SDCCAG8|SHTN1|SMAD1|STX17|TACSTD2|TMEM67|TNF|WASF1	2612/41905 genes: 6.23%
Biological Process	4	cell morphogenesis	GO:0000902	1.84e-06	0.00954	21	ACTR2|BRWD1|ETV1|FBXW8|FGD4|FLRT3|GATA1|GLI3|ITGAV|LIMS1|MAP2|MYO7A|OR10A4|PIK3R1|SEMA5A|SHTN1|SOX17|SOX6|SPG20|TACSTD2|WASF1	828/41905 genes: 1.98%
Biological Process	2	negative regulation of multicellular organismal process	GO:0051241	1.87e-06	0.00968	23	BANK1|CDK6|DLX1|ERBB4|GATA1|GLI3|GTF2I|IGF1|IL1RL1|INHBB|NF1|NPVF|PBLD|PIK3R1|REST|SEMA5A|SOX17|SOX6|SPG20|SYNJ2BP|TACSTD2|TNF|UTS2R	971/41905 genes: 2.32%
Biological Process	3	tissue migration	GO:0090130	1.89e-06	0.00978	11	CCBE1|FOXP1|HDAC9|NF1|PBLD|PDPK1|PRKCE|PRKX|SEMA5A|SYNJ2BP|TACSTD2	232/41905 genes: 0.55%
Biological Process	3	positive regulation of cellular component movement	GO:0051272	1.92e-06	0.00993	14	AKT2|CCBE1|DAPK2|FOXP1|HDAC9|IGF1|ITGAV|PIK3R1|PRKCE|SEMA5A|SHTN1|TCAF2|TNF|ZNF268	387/41905 genes: 0.92%

## Sheet: CTD_pathway
Pathway	Pathway ID	P-value	Corrected P-value	Annotated Genes Quantity	Annotated Genes	Genome Frequency
Hematopoietic cell lineage	KEGG:04640	1.8e-05	0.00293	6	CD3D|CD55|CR1|FCGR1A|IL9R|TNF	90/41309 genes: 0.22%

## Sheet: CTD_disease
Disease Name	Disease ID	Disease Categories	P-value	Corrected P-value	Annotated Genes Quantity	Annotated Genes	Genome Frequency
Nervous System Diseases	MESH:D009422	Nervous system disease	1.17e-07	9.42e-05	43	ABCA7|ABCG2|ACHE|ANKK1|BEAN1|CCBE1|CCND2|CD3D|CD68|CDH23|CDK6|CR1|CRLF1|DBT|DNMT3A|FGD4|FMO1|FOXP1|GABRA4|GATA1|GIGYF2|GLI3|GNPTAB|GRIA1|GTF2I|HDAC9|IGF1|IL9R|ILDR1|ITGAV|KCNC1|KIF1B|MRE11|MYO7A|NF1|PHF6|PRKCE|REST|SERPINC1|SGO1|SPG20|TMEM67|TNF	2369/41905 genes: 5.65%
Neoplasms	MESH:D009369	Cancer	9.39e-07	0.000754	49	ABCG2|ACHE|AKT2|ANGPTL4|BNC2|CCND2|CDK6|DNMT3A|EPS8L3|ERBB4|ETV1|FAM111B|FBXW8|FOXP1|GLI3|GNRHR|GTF2I|HIST1H2BG|IGF1|IPCEF1|KIF1B|KLK5|LIN28B|MSH3|MUC4|MYO7A|NANOG|NF1|NOM1|NXPH2|OVOL1|PBLD|PDPK1|PEG3|PHF6|PIK3R1|PNPT1|POLK|PRKCE|REST|SKAP1|SOX17|SPG20|STX17|TNF|TNFRSF10B|WDR17|ZDBF2|ZNF765	3109/41905 genes: 7.42%
Neoplasms by Histologic Type	MESH:D009370	Cancer	1.29e-06	0.00103	33	ABCG2|ACHE|ANGPTL4|CCND2|CDK6|DNMT3A|ERBB4|FAM111B|FOXP1|GTF2I|IGF1|IPCEF1|KIF1B|LIN28B|MSH3|MUC4|MYO7A|NANOG|NF1|NOM1|OVOL1|PDPK1|PEG3|PHF6|PIK3R1|PNPT1|POLK|REST|SPG20|STX17|TNF|TNFRSF10B|ZNF765	1725/41905 genes: 4.12%
Child Development Disorders, Pervasive	MESH:D002659	Mental disorder	3.07e-06	0.00246	12	AGAP1|ANKRD11|DLX1|DNMT3A|FBXO40|FOXP1|GABRA4|GRIA1|GTF2I|IGF1|NF1|SEMA5A	294/41905 genes: 0.70%
Immune System Diseases	MESH:D007154	Immune system disease	4.67e-06	0.00375	25	ABCG2|BANK1|CCBE1|CD3D|CDK6|DNMT3A|FCGR1A|FOXP1|GTF2I|HIST1H2BG|IGF1|IL1RL1|IPCEF1|KIF1B|MAP2|MRE11|MUC7|NOM1|OVOL1|PDPK1|PHF6|PIK3R1|RAB27A|TBXA2R|TNF	1179/41905 genes: 2.81%
Hemic and Lymphatic Diseases	MESH:D006425		9.08e-06	0.00729	18	ABCG2|CCBE1|CDK6|DNMT3A|FIP1L1|GATA1|GTF2I|IPCEF1|NF1|NOM1|PDPK1|PHF6|PIK3R1|RAB27A|SERPINC1|STX11|TBXA2R|TNF	704/41905 genes: 1.68%
